# Supplementary material for: Segmental Bronchial Allergen Challenge Elicits Distinct Metabolic Phenotypes in Allergic Asthma
Source: Metabolites. 2022 Apr 22;12(5):381. doi: 10.3390/metabo12050381 (PMC9145767; doi:10.3390/metabo12050381)
Supplement: Supplementary file 1 [file metabolites-12-00381-s001.zip]

Archive with 7 entries (7 files):
- BALF Metabolites On_Line_Supplement_Methods.pdf
- BALF Metabolites Supplemental Figures.pdf
- consent V13 clean 8-24-12 IRB approved.pdf
- Supplemental Table S1.xlsx
- Supplemental Table S2.xlsx
- Supplemental Table S3.xlsx
- Supplemental Table S4.xlsx
