# Supplementary material for: Segmental Bronchial Allergen Challenge Elicits Distinct Metabolic Phenotypes in Allergic Asthma
Source: Metabolites. 2022 Apr 22;12(5):381. doi: 10.3390/metabo12050381 (PMC9145767; doi:10.3390/metabo12050381)
Supplement: Supplementary file 1 [file metabolites-12-00381-s001.zip › Supplemental Table S1.xlsx]

## Sheet: Sheet1
Bucket label	RT	m/z	Name	Formula	-1	1	-2	2	-3	3	-4	4	-5	5	-6	6	-7	7	-8	8	-9	9	-10	10	-11	11	-12	12
225.94269 Da 120.91 s	2.02	226.95			87540	52634	109134	95980	94836	69490	26196	86430	82358	87688	98488	134022	104758	109964	109096	79710	108670	76214	85180	90618	75140	91628	88418	93182
157.95573 Da 120.95 s	2.02	158.963			83096	76090	104758	82232	85842	67640	59322	81788	79080	82242	98298	119714	74618	106886	68552	75196	98328	76532	87012	79012	77234	91654	83092	84666
89.96856 Da 121.02 s	2.02	90.9758			26788	18382	31084	32732	28822	24092	17182	27424	26344	27074	29110	36022	33460	31922	30032	26308	33208	21568	25846	24848	23700	29740	26006	27906
119.97873 Da 122.41 s	2.04	120.986			9186	8912	9280	9712	10714	7728	9242	8802	11456	10224	12022	12020	10522	9814	9542	12680	13736	8196	11218	11616	8828	10676	11232	11084
215.91396 Da 124.60 s	2.08	216.921			1672	1734	1918	1448	1194	1728	1410	1546	1282	1788	1706	2394	1756	2104	1778	1878	1984	1894	1946	1988	1448	2194	1638	2034
202.04399 Da 128.23 s	2.14	203.051			1390	2870	1740	2332	838	2198	900	1576	926	1320	1528	9590	1502	1476	806	1372	1476	5578	1020	800	1268	3594	1140	2584
139.99400 Da 128.93 s	2.15	141.001			1684	978	1498	0	1386	1752	1896	1712	1848	1288	1328	1386	880	1458	1054	1254	1546	1396	1564	1668	1454	0	1534	1328
151.93172 Da 133.99 s	2.23	152.939			2310	2278	2246	1964	2570	1968	2056	2594	1850	2124	1726	1698	2890	2098	1890	2268	1972	2116	1492	2394	1734	2538	2126	2218
117.97053 Da 184.08 s	3.07	118.978			3278	3160	2820	2640	3466	2248	3274	3048	2416	3498	2664	2826	3424	4088	3264	3248	4154	3760	2974	3058	2382	2444	2536	3328
161.96039 Da 185.72 s	3.1	162.968			4302	3238	3298	3750	4294	2428	3376	3624	2762	4022	2960	4244	3896	4720	3936	4394	3940	5186	3360	3324	3088	3268	3432	3580
151.93160 Da 185.81 s	3.1	152.939			2038	1358	1718	1648	2138	1238	1734	1796	1854	2520	1818	2310	2322	2284	2448	2328	2402	2302	2158	2140	1680	1976	1964	1866
175.97626 Da 186.22 s	3.1	176.984			3708	2122	2958	2046	3304	1788	3216	2850	2702	4134	2576	3328	3132	3890	3954	3752	3950	4292	3158	2982	2332	3060	3570	3764
191.97075 Da 186.30 s	3.11	192.978			1902	0	1224	1276	1906	1202	1708	1366	1434	1744	1232	1592	1698	2072	1784	1708	1750	1880	1670	1456	1312	0	1376	1704
177.99147 Da 186.88 s	3.11	178.999			4588	2328	2966	2650	3958	2538	3200	3530	2960	4816	2610	3556	3748	4636	3620	4122	4208	5192	3336	3676	2548	3196	3580	4232
290.06118 Da 470.88 s	7.85	291.068			6388	3226	674	6730	5090	2920	1522	2298	3730	1384	5080	5024	806	3014	148	1422	2058	906	0	476	682	4182	226	2518
151.04834 Da 472.05 s	7.87	152.056	Guanine	C5H5N5O	3584	1896	788	2582	3024	1710	1060	1366	1908	1340	0	2892	1090	2660	462	1424	1288	1460	614	618	782	2996	568	2122
136.03733 Da 473.11 s	7.89	137.045	Hypoxanthine	C5H4N4O	5054	3788	610	6452	5186	2924	1980	0	3902	1644	4534	3232	1180	2368	0	1352	1964	1034	0	440	784	3412	0	2716
145.10911 Da 486.08 s	8.1	146.116			3232	3500	5662	4116	3204	3326	5388	5428	3712	2178	1726	4706	8808	2810	4174	5254	4762	5220	1316	2810	3006	6742	4198	3644
636.33125 Da 492.24 s	8.2	319.173			0	0	0	2034	0	0	0	424	0	178	0	3072	0	342	0	1004	0	24388	0	0	0	82022	0	0
876.45147 Da 494.62 s	8.24	293.158			0	0	0	3118	0	0	0	246	0	0	0	4388	0	484	0	456	0	44458	0	0	0	30920	0	0
250.16665 Da 498.37 s	8.31	251.174	LID_251.1754_11.0	C14H22N2O2	5094	1202	2262	2302	2558	854	1376	710	6072	2260	0	1208	1956	652	1958	382	1648	246	1910	514	1510	492	1272	404
975.51964 Da 508.23 s	8.47	326.18			0	186	236	39180	0	0	0	3478	0	868	0	40474	0	4794	0	7060	0	162448	0	0	0	232546	0	0
246.13134 Da 510.80 s	8.51	247.139	Octopine	C9H18N4O4	194	1064	176	3838	244	660	158	558	174	326	0	8134	0	614	238	762	354	8450	154	224	176	41816	134	1662
238.16658 Da 512.52 s	8.54	239.174			7644	1720	2370	4222	1892	168	1630	1960	2132	1818	2136	680	4266	2040	2018	1422	2388	2292	2434	2396	1962	766	2232	3124
341.14703 Da 518.14 s	8.64	342.154			0	0	0	4176	0	0	0	1654	0	0	0	17260	0	0	0	0	0	41770	0	0	0	5224	0	0
168.08859 Da 518.62 s	8.64	169.096			1160	922	1582	2666	1268	684	1450	1664	1714	1042	1832	2344	1572	1016	2242	2020	1434	1544	682	756	1350	1258	526	762
231.14554 Da 520.85 s	8.68	232.153	Butyryl carnitine _isomer of 920_	C11H21NO4	3410	10584	1968	9802	3362	7768	1034	3920	1608	2984	2324	25188	2940	9662	3566	4648	2554	12016	2518	3496	2766	16394	1762	6386
172.07007 Da 521.53 s	8.69	173.077			2068	1900	1304	1758	1612	1240	1376	1608	880	1616	1278	1842	2244	1938	1740	1542	1756	1836	1338	1662	1190	1926	1458	1614
484.34842 Da 521.59 s	8.69	243.181			8190	6912	5538	15438	7784	5088	4994	11614	5986	7988	5304	13104	6268	8148	7260	7496	5694	6250	7920	8428	6210	7646	6398	7402
470.18955 Da 522.25 s	8.7	471.197			0	0	0	4294	0	0	0	1216	0	0	0	17062	0	0	0	0	0	28078	0	0	0	16102	0	0
262.18775 Da 527.90 s	8.8	263.195			26784	11726	18392	29184	16986	10272	10362	15840	16582	21326	13366	11330	10798	13300	11182	7832	11520	2334	13732	20430	24070	18598	20798	38330
173.14033 Da 528.72 s	8.81	174.148			2812	2004	2210	2672	1740	1476	1674	1632	1814	2314	1558	1534	1808	1656	1682	1480	2416	1844	1600	2404	2372	2486	3068	3976
977.47849 Da 529.51 s	8.83	326.833			0	0	0	21518	0	0	0	2056	0	0	0	36706	0	0	0	0	0	2682	0	0	0	304	0	0
301.18731 Da 531.21 s	8.85	302.195			13450	12542	11898	31904	13050	12296	9208	25476	10622	15564	8922	38478	13688	20066	17742	16598	14014	22330	10340	13564	10858	16288	12052	16538
498.36415 Da 533.97 s	8.9	250.189			3200	0	2302	3168	2730	2442	0	2404	2590	3824	0	2142	2724	2154	3714	0	3082	2276	0	2898	0	1984	0	0
584.36434 Da 537.75 s	8.96	293.189			0	1782	0	4292	2442	1284	2588	0	0	2758	1436	3130	0	0	0	1744	1650	1374	2256	2330	1036	2366	1614	1712
292.18207 Da 538.18 s	8.97	293.189			2272	0	1826	0	0	0	0	3216	2010	0	0	0	1540	2008	2864	0	0	0	0	0	1874	0	0	0
876.45184 Da 542.41 s	9.04	439.233			0	0	316	9518	0	0	0	1948	0	1000	0	10846	0	3886	0	4818	0	18510	0	0	0	38774	0	0
203.92759 Da 543.73 s	9.06	204.935			1284	1464	1140	1916	1106	1170	1630	1474	1586	1622	916	906	1980	1142	1480	1446	1592	1342	1228	1500	1578	0	1784	1532
201.94834 Da 545.04 s	9.08	202.956			1378	1016	1086	1374	1302	1360	2004	1462	1612	1596	1014	784	1662	1216	1582	1720	1316	1442	1156	1620	0	0	1598	1676
250.16654 Da 545.19 s	9.09	251.174	Lidocaine-N-Oxide	C14H22N2O2	11496	1160	2442	9228	4532	2740	2336	0	15832	2588	3886	0	1626	1180	1786	690	3540	0	1654	0	2182	846	1416	386
157.96915 Da 545.55 s	9.09	158.976			3078	2142	1700	2548	2462	2428	2878	2660	2732	3168	1426	1776	2978	2134	3038	2588	0	2442	2578	2728	1974	1460	2894	2864
795.34748 Da 549.50 s	9.16	398.681			0	0	0	4130	0	0	0	1562	0	460	0	8368	0	1482	0	4686	0	30858	0	0	0	0	0	0
230.07510 Da 551.09 s	9.18	231.082			2240	1154	1286	1652	1538	1266	1378	1694	2512	2248	1224	6960	1428	1476	2354	1918	2222	3966	1736	2054	1300	2172	2008	1706
299.17172 Da 551.24 s	9.19	300.179			5444	710	826	1892	1966	3464	6946	2116	6120	6478	2802	0	2814	1734	5004	2838	5850	1020	1182	4288	2034	0	5096	3692
403.13949 Da 555.83 s	9.26	404.147			0	0	0	0	0	278	1770	0	1140	748	3150	362	1684	838	5552	1728	4196	0	1596	1662	3114	0	4222	2704
598.37947 Da 556.72 s	9.28	300.197			3542	2238	2524	2792	2784	1914	3492	3192	3242	4880	444	2006	2180	3066	4340	0	2458	1028	3086	0	4238	3476	0	2322
154.14588 Da 557.74 s	9.3	155.153			5898	3794	4788	5166	4376	3112	5144	3340	4856	5270	4342	3852	4880	4720	4536	3676	3400	3648	6806	4638	4900	4380	5192	3848
252.10954 Da 557.74 s	9.3	253.117			1078	562	2174	6272	500	1028	0	1350	0	2704	370	1552	474	1032	374	658	628	4882	0	864	788	34368	264	382
264.01567 Da 558.56 s	9.31	265.023			464	0	1520	1952	1262	600	1256	730	1008	2326	3626	2180	1440	1222	404	212	3976	3510	1014	776	2532	996	378	514
142.09822 Da 564.89 s	9.41	143.105			9052	3988	8880	5360	7404	4186	12910	4282	12258	9270	7730	3474	8466	4634	9060	5214	6654	2606	17508	6968	12072	4402	10622	5174
159.12485 Da 565.09 s	9.42	160.132			62084	23460	59798	40438	52060	30648	101130	30134	83398	67772	57538	24826	66790	26276	67888	35284	45852	18908	129978	51340	90600	26194	73428	37184
113.08296 Da 565.35 s	9.42	114.09			5320	2264	4872	3054	4874	2814	7716	2638	6142	6220	4960	2266	5730	2202	5628	3312	3640	1450	11562	4748	7102	2238	6690	2792
315.20294 Da 565.66 s	9.43	316.21			28036	17446	21616	28468	24732	18046	24374	21348	28012	29000	18984	26544	26628	26874	30496	27224	26886	25124	23920	27866	24554	22292	31184	26754
186.08601 Da 568.58 s	9.48	187.093	Deoxyvasicinone	C11H10N2O	1560	1326	1888	2138	1770	1454	1736	1746	1734	1804	1774	2200	1988	1808	1742	2086	1946	1700	1900	1496	1680	1660	1978	1980
218.04513 Da 569.19 s	9.49	219.052			746	566	610	420	2480	506	844	964	676	732	4550	3944	848	670	0	882	982	984	7280	10054	668	540	1064	852
266.12490 Da 569.97 s	9.5	267.132			518	0	1238	3774	0	198	190	1032	0	710	1060	11654	0	1120	142	0	0	18690	0	0	602	38198	0	0
194.10618 Da 570.59 s	9.51	195.113			10212	5564	5302	8940	12744	3726	10362	10978	7000	5342	13832	12422	17158	8996	12540	9260	6172	3900	2410	1876	6760	3312	4638	2258
173.14031 Da 570.80 s	9.51	174.148			12572	5738	6294	5550	5762	3672	4666	3784	6060	5786	6276	4180	4300	5234	4818	3932	6126	624	5988	7262	7344	5512	6226	9054
1010.54711 Da 571.07 s	9.52	506.281			0	6272	0	14366	0	438	0	7888	0	16416	0	33846	0	10766	190	23402	1322	8406	0	6298	480	38650	0	2774
404.21872 Da 571.54 s	9.53	405.226			210	2250	206	3742	0	0	0	2144	0	5996	0	7574	0	2972	0	6140	404	2004	0	1368	0	15092	0	906
1240.37495 Da 571.54 s	9.53	621.195			0	990	6076	1118	1380	798	502	694	714	1202	1278	6222	584	3208	2254	682	916	324	1424	1248	1846	0	1632	1792
1010.04570 Da 572.19 s	9.54	506.03			0	6256	0	13416	0	0	0	7196	0	17552	0	30490	0	9264	0	22492	1614	8358	0	5246	446	35292	0	0
166.05997 Da 572.30 s	9.54	167.067			1202	0	0	842	1882	3084	3226	1214	5312	3648	8902	1522	3452	1186	4466	888	4510	0	3742	3558	4604	0	5270	2844
245.16111 Da 572.32 s	9.54	246.168			3098	4154	2960	10550	2658	3394	990	4098	2318	3744	1874	18544	2504	5090	3142	3374	2570	14110	3332	6358	2470	9510	2568	3972
129.15054 Da 572.90 s	9.55	130.158			3650	1130	2800	1346	2622	1218	5238	1230	4690	2270	2300	1286	1830	880	3110	1074	2536	1186	6464	2896	3166	1204	2436	1008
272.05570 Da 573.03 s	9.55	273.063			0	0	0	0	638	2038	1586	1786	1720	1610	1238	1612	1706	2300	2386	1670	2142	1144	1988	1946	2100	1542	2662	2768
1213.59085 Da 573.12 s	9.55	607.803			328	0	1696	41906	0	274	0	574	876	0	0	6416	0	962	0	1080	0	460126	228	0	0	843182	0	0
462.17646 Da 576.40 s	9.61	463.184			0	0	0	4140	0	0	0	546	0	0	0	2482	0	644	0	1726	0	49922	0	0	0	40774	0	0
274.10113 Da 577.80 s	9.63	275.108			3108	2090	1954	2132	2380	1764	1594	2366	3182	3370	1706	18712	1954	2292	2660	2800	2524	10098	1530	2700	2432	2958	3458	2994
297.08781 Da 580.01 s	9.67	298.095			3960	3910	2902	6770	2852	3404	1408	3428	2008	2668	1434	6494	1742	4292	4374	4530	2842	2452	1442	3818	2152	3386	2054	5564
204.08831 Da 580.18 s	9.67	205.096	L-Tryptophan	C11H12N2O2	1568	2780	1432	4238	982	3274	556	1358	742	960	844	14342	776	1852	828	1460	734	4328	0	484	1250	11316	988	3150
187.06196 Da 580.19 s	9.67	188.069			13004	27866	7802	38534	13476	35080	5728	16246	6628	7618	7172	132964	8210	24334	10116	19036	7800	43672	2906	5272	8830	88342	8106	36944
220.15610 Da 580.95 s	9.68	221.163	Prilocaine	C13H20N2O	2984	1336	2176	2170	2874	3748	3236	544	3620	4972	3322	434	2676	1322	2572	1194	1902	0	3540	2052	6030	1036	2212	2098
271.17673 Da 583.50 s	9.73	272.184	4-oxo-4-_3-oxodecan-2-ylamino_butanoic acid	C14H25NO4	4066	2262	4660	2440	5204	1774	3840	3200	3616	1722	1106	2772	4276	3490	5518	4558	4452	3578	774	4278	2604	2728	5322	3550
1713.84947 Da 588.10 s	9.8	572.29			236	194	134	3380	0	0	142	3048	0	866	382	73566	0	6550	0	3350	0	75242	0	0	208	67230	0	0
193.10875 Da 590.00 s	9.83	194.116	3,4-Methylenedioxy-N-methylamphetamine _MDMA_	C11H15NO2	3694	3266	2902	2990	3714	3338	3644	2172	4142	4082	3088	1908	3926	3686	3666	3160	3884	262	4288	4176	3494	2798	3996	3564
235.19398 Da 590.72 s	9.85	236.201			17882	4606	4302	12532	7606	5700	5710	1120	14892	36244	10372	994	11840	5690	10058	1196	7710	0	15792	9400	16028	2600	10340	5970
558.31408 Da 590.72 s	9.85	559.321			4376	2302	3268	3666	3582	2672	2818	1236	3894	4496	3536	962	3836	3798	3972	1626	3584	0	3504	3806	3844	1876	4022	3608
473.35150 Da 591.25 s	9.85	474.359			1824	1098	1160	1156	1328	1308	1748	856	1460	2028	1296	0	1246	1186	1300	980	1376	0	1386	1904	1438	386	1868	1380
548.28514 Da 591.28 s	9.85	549.292			13448	7018	11028	12806	9870	8086	6730	3948	12600	14652	15028	3858	10658	9906	11190	4438	10404	0	12582	11278	13280	0	10802	8570
314.11203 Da 591.32 s	9.86	315.119			8176	4876	7592	7608	7048	5472	4520	3030	7906	8738	9688	3262	6374	6390	8192	2936	6786	410	8146	6288	8150	2812	8002	5624
235.17480 Da 591.34 s	9.86	236.182			10046440	9212672	9341856	9894914	9545604	9480002	9469524	7495360	9912212	10059648	9728746	5895750	9884142	9305776	9839476	7285912	9742658	2979930	9895138	9794516	9963340	8691248	9879034	9396388
85.08842 Da 591.44 s	9.86	86.0957			1426688	993352	1043016	1203132	1181220	1056836	1064072	665728	1343480	0	1320504	600568	1091878	1102016	1300018	289466	1127260	264908	1259946	1262516	1221974	891940	1269034	1111440
324.14095 Da 591.52 s	9.86	325.148			4586	3538	3650	4420	3802	2970	2720	1730	4438	4556	3818	1070	3682	3466	4038	1970	3908	0	4310	4294	4112	1726	4422	2902
234.43418 Da 591.55 s	9.86	235.441			9200	7920	7366	9106	8226	8800	8500	6272	8890	9118	9284	0	8710	8246	8892	7188	9134	2256	9320	8992	9404	7288	9514	8078
234.36747 Da 591.71 s	9.86	235.375			178484	141370	146808	156634	152628	147824	145230	127322	156542	189552	123266	105876	142336	153098	161246	122658	154126	55784	154140	149040	162946	137410	154594	140310
233.98461 Da 591.80 s	9.86	234.992			0	0	6686	10598	0	9682	8956	1374	0	1382	8790	5658	9552	0	10266	4464	8778	0	0	10424	0	8600	10540	10596
702.44961 Da 591.83 s	9.86	235.157			42522	35364	35342	40566	36772	34744	35940	28412	37940	44578	31234	22192	27426	32860	38736	20200	38738	14408	37886	38294	39752	30786	38362	34112
234.60458 Da 592.20 s	9.87	235.612			4566	4128	3860	4302	0	4508	4224	3058	4496	4990	4208	2468	4082	3792	4396	2798	4742	1086	4664	4422	4174	3580	4034	4070
234.03181 Da 592.38 s	9.87	235.039			16060	11342	0	13698	14412	12818	12820	8718	0	17560	13920	0	14184	5350	12998	9098	13180	3204	11322	13298	13494	10152	14802	13168
234.65151 Da 592.58 s	9.88	235.659			288814	277500	296834	297076	295130	299856	296690	230910	289066	300486	252114	0	208740	283364	283868	230862	301916	99710	288776	287424	292304	264988	296776	286780
233.95694 Da 593.49 s	9.89	234.964			5854	7168	6370	5998	5288	7924	6162	6008	8112	10586	8936	0	8466	6146	8816	5292	5306	0	7658	8358	9716	6140	6492	7624
225.94270 Da 593.61 s	9.89	226.95			1846	1300	1744	1520	1710	1142	974	948	1432	1278	1972	804	1370	1582	1500	1254	1876	0	1388	1496	1558	914	1658	1388
234.05579 Da 594.25 s	9.9	235.063			18286	12536	12846	13610	16234	15416	15220	9062	15560	16712	17562	8512	14682	13406	16782	10342	15540	3866	14530	13528	17456	11760	12494	13562
318.12543 Da 594.30 s	9.9	319.133			2032	1928	1790	1768	1702	1922	2286	1820	1942	1972	1624	4432	2190	1856	2018	1654	1810	5468	1740	2008	2080	2062	2068	1858
233.90725 Da 595.52 s	9.93	234.915			5656	2200	3960	3634	4518	4444	4310	3226	3346	2852	5118	2832	5368	4452	4686	3408	3718	0	4404	3216	5730	3820	5860	4728
1757.77440 Da 595.84 s	9.93	586.932			0	0	0	1584	0	0	0	198	0	0	0	5170	0	0	0	518	0	45082	0	0	0	55948	0	0
234.00855 Da 596.27 s	9.94	235.016			12552	10604	4142	10802	8186	5206	11142	4926	7300	11384	12164	5950	7100	7346	12456	3098	13186	0	7686	9730	12166	9250	5536	5708
234.54302 Da 596.34 s	9.94	235.55			1924	1712	1600	1442	1600	1596	1618	1498	1526	0	1660	1392	1718	1604	1782	1484	1630	1010	1732	1592	1704	1364	1592	1408
234.13229 Da 596.97 s	9.95	235.14			38116	30300	31584	37640	36380	30850	31306	21192	37340	21384	25766	17348	32420	31352	11736	0	34470	6866	0	34672	36298	27260	35640	32402
1194.62236 Da 598.31 s	9.97	598.318			404	170	7436	0	0	0	552	0	0	358	0	954	5508	0	4030	0	464	0	1284	474	3118	1026	0	0
1195.12435 Da 598.52 s	9.98	598.569			0	212	7468	0	0	0	536	0	0	294	0	0	7302	336	5354	0	608	0	1272	836	2656	0	0	0
235.08411 Da 599.29 s	9.99	236.091			2130	2170	2006	2170	1894	2166	2142	2230	2286	2142	2134	2182	1996	2176	2156	2060	2038	1524	2366	1974	1974	2108	1924	1982
234.08488 Da 599.60 s	9.99	235.092			6706	5004	11666	0	11892	7114	7938	3300	18108	0	9318	3044	5134	8948	20432	5182	9126	0	6802	11278	17068	6260	0	18426
235.45523 Da 599.93 s	10	236.463			1898	822	1842	1704	1514	1884	1688	1776	1354	2106	1154	1088	1858	1710	1928	1378	1684	0	1268	1914	1854	1554	1808	1610
705.86216 Da 601.33 s	10.02	236.295			0	0	3210	2772	2762	0	3218	2986	3104	0	2814	3276	2996	2760	0	2852	2870	2114	3134	3010	2870	0	0	2712
234.31028 Da 603.80 s	10.06	235.318			0	1780	0	2060	1766	1986	0	1854	0	1690	0	1518	1842	1550	1826	1822	0	1696	0	0	1684	2118	1696	0
468.62057 Da 604.48 s	10.07	235.318			1702	0	1940	0	0	0	0	0	0	0	0	0	0	0	0	0	2098	0	1794	1810	0	0	0	1752
1026.03410 Da 607.93 s	10.13	514.024			0	752	0	5572	0	0	0	648	0	0	0	2060	0	954	0	406	0	4314	0	0	0	551654	0	0
211.10943 Da 608.42 s	10.14	212.117	1,3-Diphenylguanidine	C13H13N3	26256	20576	24454	5204	52536	219032	106836	392450	175350	90282	233974	120250	84376	104564	181946	74868	242370	64964	184816	52962	140438	85516	123956	244450
173.14026 Da 609.58 s	10.16	174.148			3700	1720	4132	2372	2674	1896	3844	2922	3348	3132	2522	2788	3370	2560	4426	3758	3362	3128	3132	3200	4196	3672	3308	2500
343.21884 Da 609.78 s	10.16	344.226			2576	2352	2458	2106	2432	2050	3104	2620	2712	2908	9176	14490	3636	2524	12480	3460	3078	17800	17294	6998	3532	2944	2252	2476
225.09837 Da 610.34 s	10.17	226.106			2226	1102	3044	1860	1884	1898	1526	2920	2668	2220	3562	1996	1962	2552	2604	2298	2758	2046	2370	2552	3456	2438	3380	3836
237.09123 Da 611.33 s	10.19	238.099			2042	1126	2368	1668	2736	1470	2694	1750	2098	2214	1986	1968	2478	1492	2534	2148	2394	2510	2418	2242	2880	1530	2030	2046
429.23427 Da 612.13 s	10.2	430.242			2038	892	2132	1424	1532	986	2748	1156	2086	1588	1284	414	1746	1354	2426	906	1220	0	2000	2052	2278	1628	1686	670
575.26073 Da 613.59 s	10.23	576.268			0	0	0	4434	0	160	0	890	0	350	0	2190	0	1566	0	2012	0	33936	0	0	0	48322	0	0
1251.16528 Da 613.70 s	10.23	626.59			318	0	9946	0	0	0	440	0	0	0	0	0	4130	0	2618	0	568	888	916	478	1936	514	0	0
1011.49857 Da 613.77 s	10.23	506.757			642	0	350	18256	294	686	0	454	0	616	252	4412	0	1922	0	368	0	19096	0	156	0	41252	0	0
224.06467 Da 614.56 s	10.24	225.072			1442	1180	1678	1214	1688	1338	1098	2034	1512	1596	1570	1910	1250	1900	1678	1502	1728	1504	1594	1646	1522	1100	1808	1446
1636.86359 Da 615.54 s	10.26	546.628			526	2034	1374	4630	0	718	0	2072	0	12426	0	14092	166	11190	550	5704	512	1916	176	2324	1166	10238	0	1670
157.10912 Da 616.43 s	10.27	158.116			444	318	308	0	796	1760	1618	2368	2138	1740	1642	2988	2532	2222	1918	1384	1818	1352	1630	1230	2702	1390	2412	1720
244.17707 Da 617.94 s	10.3	245.184	N-L-Leucyl-L-leucine	C12H24N2O3	2332	882	8612	23252	1036	854	1452	1402	1300	1414	1222	48418	600	280	846	0	790	133794	708	878	936	151686	916	826
232.97619 Da 618.33 s	10.31	233.983			3204	1756	818	5476	1120	0	2272	3586	942	2238	896	610	1546	1462	662	600	846	1348	878	1346	2292	2164	1394	1332
175.97767 Da 618.71 s	10.31	176.985			7596	2960	1186	8390	2910	3558	5852	5324	2628	5150	3006	2134	2908	4534	1544	1890	3010	4276	2644	3900	3986	2432	4466	4910
312.15304 Da 619.93 s	10.33	313.16	Pyrenophorol	C16H24O6	958	640	1066	896	2954	5144	5030	7754	7922	5628	15302	10060	5350	7182	9346	6212	8314	4814	7840	7612	9902	8804	9214	7144
286.09131 Da 620.94 s	10.35	287.099	_2R,3R_-3,7-dihydroxy-6-methoxy-2-phenyl-2,3-dihydrochromen-4-one	C16H14O5	1062	6574	1994	4816	1770	4456	676	3966	1330	2494	874	33348	1296	4610	640	2440	838	12284	504	1186	1700	14014	558	3312
387.24513 Da 622.03 s	10.37	388.252			6676	4004	4376	3726	5162	3906	5266	5152	4514	6846	25306	30702	6202	5700	38044	6024	5580	35012	47036	18642	7454	4766	5884	4776
330.21367 Da 623.85 s	10.4	331.221			2262	2550	1902	1844	2166	1966	2488	1990	2522	2552	1424	1760	2086	2116	2332	1820	2054	2272	1970	1966	1734	1478	2134	2012
195.04942 Da 624.59 s	10.41	196.057			588	4686	282	5272	0	3602	0	1562	0	318	578	32348	0	2036	0	1578	910	16492	0	0	0	12922	0	5588
137.05767 Da 624.77 s	10.41	138.065			5672	1568	234	2334	5158	6530	1032	3842	10588	5704	16874	6648	2294	2108	0	304	1984	1304	886	474	5308	5032	1228	750
250.16647 Da 625.12 s	10.42	251.174	LID_251.1754_11.0	C14H22N2O2	238866	130670	69996	2148322	288598	199610	215514	147938	2587898	354684	294370	173916	180524	584954	100980	128074	175194	486542	120396	144224	123184	368594	163456	99646
129.07775 Da 625.58 s	10.43	130.085			3146	1682	1124	24080	3276	3000	2382	1744	30692	3858	3776	2472	2240	8036	1326	1718	2142	7180	1760	1764	1530	6442	2158	1366
294.10635 Da 627.09 s	10.45	295.114			1488	1176	1254	0	1230	970	1172	1608	1480	1312	1468	1400	1450	1658	1664	1312	1428	1246	1540	1288	1468	1454	1328	1568
919.45170 Da 627.53 s	10.46	460.733			0	820	146	6730	0	1138	0	1494	0	1088	0	70040	0	3046	0	9256	0	55336	0	0	0	31830	0	390
256.09072 Da 628.32 s	10.47	257.098			1998	1594	1792	2174	2008	2474	2136	3192	2282	2760	2836	3272	2402	2438	2576	2430	2766	2472	2494	2542	1952	2112	2906	2540
244.12723 Da 629.71 s	10.5	245.135			3472	2824	3470	3364	4290	3568	3162	3252	3642	4056	2734	3308	3966	3402	3832	3418	3748	3876	3390	3362	3710	0	3564	3158
259.17679 Da 630.28 s	10.5	260.184	Hexanoyl-L-Carnitine	C13H25NO4	3068	13000	4158	18336	0	6254	1058	5726	2612	5012	5444	95578	2746	14536	3096	3374	5062	22628	4286	12480	2836	28440	2170	6846
424.26684 Da 631.53 s	10.53	425.274			2266	0	0	5024	1496	806	1032	2188	858	3342	842	27386	0	10286	0	2250	330	32554	0	0	0	18474	0	0
197.11893 Da 631.60 s	10.53	198.126	Dibenzylamine	C14H15N	38922	6894	104532	3200	44356	56982	690560	56904	268130	56746	172132	0	47054	22650	314036	12020	189590	2394	1045540	118358	392206	13524	218896	47648
90.04618 Da 631.73 s	10.53	91.0534			3246	408	7926	206	3454	3594	46140	4392	17448	3726	12394	812	3254	1776	24336	1606	13500	0	69924	9884	28528	1838	17946	3472
646.29754 Da 631.80 s	10.53	647.305			0	0	0	13294	0	278	0	1556	0	542	0	2354	0	1872	0	1618	0	43308	0	0	0	64332	0	0
212.06479 Da 631.82 s	10.53	213.072			3888	3016	4168	3396	4664	2844	3292	3160	4228	3966	3600	4778	4740	6104	4116	4114	5262	3806	3508	4098	3776	2698	4770	4702
180.09235 Da 632.04 s	10.53	181.1			2464	0	7894	0	3286	3490	47522	4182	18656	4172	11932	1194	3640	1996	23664	1448	14178	756	63710	8920	28636	1270	25274	3170
626.30443 Da 632.14 s	10.54	627.312			0	914	0	8774	0	202	0	1118	0	460	0	0	0	1712	0	1978	0	126784	0	398	152	219534	0	444
431.27130 Da 632.84 s	10.55	432.279			8622	5850	6578	5186	7980	4920	7644	7530	7620	10352	35234	48968	9194	8810	68072	10454	7244	47374	72062	28116	13300	8070	7676	7644
903.45697 Da 634.70 s	10.58	452.736			0	5694	0	80476	0	4750	0	4798	0	1858	432	267162	0	12562	0	12592	134	268076	0	0	0	432784	0	4448
925.43894 Da 635.41 s	10.59	463.727			0	1242	0	12376	0	890	0	572	0	416	0	41144	0	0	0	1974	0	24800	0	0	0	33488	0	582
301.22356 Da 636.91 s	10.62	302.231			2060	1228	2348	1334	1548	1252	1326	1524	1182	1310	1720	1214	1376	1386	1504	1160	1560	0	1462	1874	2442	1424	2698	2554
193.10776 Da 637.58 s	10.63	194.115	3,4-Methylenedioxy-N-methylamphetamine _MDMA_	C11H15NO2	4692	6540	7292	8350	3856	6052	5656	8126	5576	4768	3392	3572	9296	3820	3430	5274	5254	5280	2408	4520	7166	9562	5860	5058
154.09815 Da 638.14 s	10.64	155.105			2974	5020	4650	5096	3028	3904	4800	4532	3918	3848	2542	1968	7204	3284	3734	3336	4034	2430	2364	4506	5626	5270	3136	3154
254.19782 Da 638.58 s	10.64	255.205			68782	47298	61766	66124	61058	48566	61846	60350	60852	73178	49056	51148	63368	72924	64906	60426	72128	66082	59302	61874	71716	53854	65234	51846
278.16131 Da 639.84 s	10.66	279.169	Phenylalanylisoleucine _isomer of 1329_	C15H22N2O3	1146	880	6946	13678	642	958	954	1128	692	1162	646	4824	1048	994	1080	0	1034	51908	744	820	1300	160074	1234	1032
181.18171 Da 639.88 s	10.66	182.189	Dicyclohexylamine	C12H23N	100220	11274	99938	12514	87980	41432	102750	17240	85092	85986	67050	9942	108076	17054	114672	33326	84038	18696	105696	97480	134656	9620	116870	38106
147.03095 Da 639.98 s	10.67	148.038	1H-Isoindole-1,3_2H_-dione	C8H5NO2	3796	1616	3624	3282	5378	3172	1852	3308	6498	4358	2578	2482	4278	3110	2184	1674	3514	2606	1808	3130	3162	3732	2608	3590
941.45687 Da 640.52 s	10.68	471.736			0	236	0	6664	0	0	0	0	0	0	0	44630	0	0	0	138	0	84290	0	0	0	69050	0	0
210.12231 Da 640.88 s	10.68	211.13			670	610	0	1002	4936	1602	1192	1950	2774	0	0	0	1476	1192	0	0	3446	2280	2108	0	1674	1544	0	2374
182.05461 Da 640.95 s	10.68	183.062	methyl orsellinate	C9H10O4	1908	1566	2158	1766	1912	1924	1892	2632	2138	1754	1970	2702	3020	2024	2296	2670	2854	2666	2144	2288	2628	1686	2280	2108
475.29740 Da 641.88 s	10.7	476.305			4446	3220	4088	3462	3044	3054	4262	3914	3302	4734	18292	17174	4884	3970	39422	5134	3392	23534	37170	14616	7760	4938	4108	3816
331.20902 Da 642.71 s	10.71	332.216			316	0	0	9990	152	0	0	0	0	0	0	41708	0	0	0	0	166	16622	490	0	444	40922	0	0
399.13877 Da 643.37 s	10.72	400.146	Difloxacin	C21H19F2N3O3	0	0	0	2470	0	0	0	658	0	246	0	5712	0	1140	212	0	0	16524	0	182	0	43888	0	0
288.15349 Da 646.01 s	10.77	289.161			2472	1974	2198	1578	2114	1680	2130	2052	2082	2062	1900	2168	2206	2168	2442	1834	2596	1762	2170	2252	1864	1488	2146	2254
193.01578 Da 646.64 s	10.78	194.023			0	0	0	0	1048	3686	1696	3286	3718	1994	5038	6606	4116	3882	4584	3010	4236	924	3760	4188	4098	2784	3296	3332
270.10637 Da 649.06 s	10.82	271.114	Tolbutamide	C12H18N2O3S	7826	3862	7192	6194	7068	4902	6034	6206	10374	7370	11424	7318	6926	8330	8094	7072	8902	7200	7744	8814	9762	5268	9318	7238
519.32346 Da 649.50 s	10.83	520.331			3008	2312	2168	2528	2004	1470	3074	2434	2800	3310	12596	12820	2830	2922	21366	3112	2064	12860	20862	10930	4174	3460	2686	2422
546.25950 Da 649.80 s	10.83	274.137			3864	1670	3050	3152	3380	1518	0	2688	3054	2926	32460	21956	2970	4618	30630	2282	3474	7884	36884	10236	6904	2282	3974	2942
188.04171 Da 653.69 s	10.89	189.049			1162	946	1444	1110	1922	1388	0	1872	1830	1400	2648	2560	0	1744	1632	1288	1998	848	1484	1338	1774	0	1910	1544
341.25493 Da 654.40 s	10.91	342.262			3498	2824	2514	6324	4130	4246	2954	2066	3044	4890	2290	6396	2702	3498	5946	0	4136	2384	2492	3712	2378	4830	2386	2912
590.28834 Da 656.67 s	10.94	296.151			8136	3832	8252	5304	7384	4490	4842	4934	7494	6318	48206	35920	7930	7196	59418	6894	6986	15010	58508	20358	13696	3906	8384	5942
563.34970 Da 656.83 s	10.95	564.357			2618	1872	1932	1934	1906	1376	1766	2242	1874	2604	8446	9014	2728	2486	18566	2372	2288	8474	16020	7470	3084	1748	2204	2416
193.07081 Da 661.70 s	11.03	194.078	3-Methylhippuric acid	C10H11NO3	66548	24760	61726	42516	62656	37728	67118	38126	61798	61174	51502	12724	68784	34350	67412	45294	74766	20786	57650	60872	62880	17808	74324	39588
607.37592 Da 662.84 s	11.05	608.383			1806	1020	1300	1526	1042	882	1178	1526	1608	1464	4960	6932	1428	1844	10994	1754	1518	4260	9356	3750	2550	1096	1166	1048
634.31200 Da 662.94 s	11.05	318.163			8946	4150	8534	8846	7274	5060	5904	7004	9042	7086	47552	35804	7042	9182	56810	6524	8762	13922	62738	17418	14204	1808	9162	6410
148.08754 Da 663.00 s	11.05	149.095			1208	0	1464	0	1194	1206	0	1344	1836	0	1528	1312	2442	0	2966	1298	2580	0	3790	2524	2908	1434	4006	3432
412.11800 Da 666.26 s	11.1	413.125			1308	2048	1862	2056	1630	1376	2212	2910	2204	1022	1354	1316	2396	1860	1536	2516	2126	2578	608	1938	1650	1876	1788	1978
678.33883 Da 668.65 s	11.14	340.177			5450	4034	0	5448	3424	3358	3606	4868	4288	3464	22234	13582	3814	4866	21872	3996	4266	5504	31582	9070	7990	1276	4564	3040
240.05952 Da 668.95 s	11.15	241.067			30114	8146	37398	12848	29728	23388	29454	13334	28672	24796	24662	5710	26242	12344	51054	29864	31218	10156	30278	26312	29760	8600	32900	17306
180.03885 Da 669.34 s	11.16	181.046			2372	918	2904	962	2390	1704	2474	1066	2134	2540	1830	0	1934	968	3838	3126	2464	992	2202	1958	2334	794	3088	1304
231.04713 Da 670.46 s	11.17	232.054			428	2692	0	5866	352	2306	0	608	0	0	276	27996	326	1876	172	1704	736	12892	0	0	0	5430	398	3904
198.12184 Da 670.98 s	11.18	199.129			0	0	6212	0	4970	18494	9992	15122	22616	13722	11602	22512	12324	15142	12822	11550	9966	7950	17990	17462	31940	32984	29610	25700
159.06739 Da 672.36 s	11.21	160.075	2-methylquinolin-8-ol	C10H9NO	3016	774	1208	4078	1466	1648	1152	782	43002	2250	2210	2278	1994	2260	1156	1382	1194	2590	2294	1668	2990	2204	1894	1008
722.36432 Da 673.74 s	11.23	362.189			3914	2620	3780	3910	2484	2110	1796	3062	2328	2196	10386	8306	3058	2858	11808	2792	3706	0	12712	5198	5158	1630	2822	2376
142.10951 Da 675.05 s	11.25	143.117			2520	2858	3064	4512	2598	1422	2682	3488	2706	2746	2148	4542	3364	4350	3092	2350	2262	3364	2586	3176	3544	4980	3262	2038
177.02690 Da 675.76 s	11.26	178.034			6488	3232	6862	4202	5642	3410	4208	3308	3758	4258	3464	3416	5824	3894	5162	4314	4032	4250	3754	4642	6182	3846	6084	4458
287.14084 Da 675.95 s	11.27	288.148	C.I. Basic Red 9	C19H17N3	0	0	480	344	1834	3674	7616	14006	8706	3698	7592	2582	3996	4578	6036	1226	7950	0	17884	368	0	0	1606	0
1602.93017 Da 675.99 s	11.27	535.317			2102	0	0	22700	1738	2070	1014	13790	910	8444	2596	85674	0	66686	270	8634	0	23860	0	0	0	18632	0	0
766.39355 Da 678.01 s	11.3	384.204			3152	2590	5296	3932	4034	3150	4018	3944	5518	4270	38200	5290	4772	4906	9296	3366	4642	3202	8730	6170	4394	2342	4542	3794
744.41083 Da 678.05 s	11.3	373.213			1878	1260	2216	1816	1490	1308	0	1360	2030	1750	0	2046	1746	1406	4070	1890	1816	1896	0	1892	2038	976	0	2062
231.97584 Da 679.23 s	11.32	232.983			928	4936	1836	24694	1268	3086	920	10218	1630	6562	1242	46476	1336	8204	0	3660	2368	8874	0	0	2824	28016	1088	2024
302.16880 Da 679.25 s	11.32	303.176			4438	2920	4240	3448	3810	3072	4108	3466	3542	4604	3156	4092	4596	4868	4470	4120	5358	4032	3132	4284	4062	3166	3770	4212
155.12986 Da 681.42 s	11.36	156.137			0	0	3848	1554	350	758	0	0	29300	9556	8920	3138	812	334	342	0	1542	918	4546	2108	706	566	0	1494
325.07649 Da 681.53 s	11.36	326.084	Midazolam	C18H13ClFN3	12622	8340	54134	32522	20740	8340	23418	34914	26610	17766	34338	44516	32554	37342	23898	12860	10138	1746	21122	10674	12770	17066	21230	8780
810.41675 Da 682.50 s	11.38	406.216			6340	2748	5588	0	4950	0	4312	3208	5230	5350	6432	6448	4828	6348	10958	5296	6670	4318	7680	6080	3826	1976	5480	5060
805.46065 Da 682.52 s	11.38	403.738			1790	1224	0	1258	1780	1244	2244	1498	1762	2486	0	1554	2330	1962	3094	0	2808	1648	3268	2470	0	1048	2150	2026
720.09933 Da 682.99 s	11.38	241.04			3016	1536	3100	3200	3954	2304	1960	2070	0	2966	3300	4150	2686	3808	2624	2998	4388	2424	3240	2252	2788	1274	3530	0
270.14249 Da 683.25 s	11.39	271.15			11632	7768	12900	9062	10918	9620	10484	9200	11216	12890	9158	11670	13826	12576	11558	10522	14444	12454	10150	12772	9876	8460	13360	10968
264.17073 Da 684.90 s	11.42	265.178			0	0	0	0	528	1442	1304	1682	1608	1582	2346	1634	1820	1582	1920	1342	1728	896	1552	2034	1764	1972	2208	2034
854.44343 Da 686.79 s	11.45	428.229			4898	2168	4816	4190	3294	1966	2668	3418	3672	3688	0	4644	3904	3414	7230	3460	3646	2886	8362	5504	3742	1202	3452	2980
415.34306 Da 687.48 s	11.46	416.35			64382	10874	3666	2296	1264	0	1218	1070	115692	128598	1636	210	7442	21376	0	0	0	0	474	366	1770	436	1812	566
898.46914 Da 690.50 s	11.51	450.242			3220	1374	3742	2786	2492	1822	0	2146	2398	0	3248	3518	2152	2986	4160	2310	2654	1656	8402	0	0	0	2358	1854
328.14792 Da 690.51 s	11.51	329.155			6374	4314	5640	7132	6064	4790	6420	6584	5414	5686	5194	6072	5258	5804	5552	4960	6580	6626	5840	4758	5698	5076	6044	6466
167.03920 Da 691.15 s	11.52	168.046			0	0	0	0	0	3310	0	772	0	584	0	38256	0	3572	0	2698	0	16270	0	0	0	19900	0	0
270.13531 Da 695.98 s	11.6	271.143			21032	0	0	21552	0	1046	0	0	599496	7286	23810	0	0	69198	0	5186	0	14036	0	0	0	5544	0	0
287.20798 Da 696.16 s	11.6	288.215	Octanoyl-L-Carnitine	C15H29NO4	3898	16296	5008	51052	2850	6824	1984	17366	5622	13326	7554	109044	4860	32456	7370	8468	15864	49472	10798	34106	3316	60748	3286	13154
133.08799 Da 696.35 s	11.61	134.095			51256	3218	13850	9282	15982	3008	7316	9286	167630	18818	45830	11314	13780	8946	12314	3284	21806	4060	3048	3000	6338	6636	6526	2258
140.01367 Da 697.54 s	11.63	141.021			1940	1060	1832	1862	1282	1100	1958	2126	1430	1420	810	1072	1778	1600	1264	1450	1308	2568	1188	1260	1680	742	1756	1588
395.25543 Da 699.29 s	11.65	396.263			32396	19702	49612	26466	39484	40256	29834	22846	32034	74020	41284	22482	34826	42600	24402	9908	22074	5036	25458	23342	38394	10098	38794	17406
212.13772 Da 699.53 s	11.66	213.145			20684	11308	22956	18294	19040	12794	16574	14796	17014	17898	14454	18890	18096	17890	22982	19730	26122	20718	15078	18034	16538	13370	21700	18866
185.14027 Da 699.70 s	11.66	186.148			4566	4570	4516	4264	3238	3948	5220	5448	4406	4940	2414	2376	0	4564	3264	3226	3434	3054	2530	4324	4198	4458	4542	3744
194.05449 Da 701.97 s	11.7	195.062	Isoferulic acid	C10H10O4	3736	2750	5020	5188	4322	1276	1696	1842	1620	1946	1864	1816	1336	1692	1588	1568	1562	1682	2110	1556	1914	806	2166	1810
228.05162 Da 702.12 s	11.7	229.059			0	0	0	0	1324	4346	1440	2806	3126	2270	5046	4010	1800	3682	3532	2894	3650	1048	4608	3536	3896	2984	4060	6456
320.12170 Da 702.21 s	11.7	321.129			2028	1330	3080	2742	2128	1550	1376	1888	2486	1644	2132	2526	1556	1924	2144	1978	2776	1622	1800	14388	2574	1132	13450	1958
413.32743 Da 702.27 s	11.7	414.335			2674	676	1584	624	18188	5492	18156	22512	6306	5272	12778	2264	1714	3330	8332	0	1122	0	4318	3620	6424	446	8814	4718
392.19039 Da 703.04 s	11.72	393.198	Paramethasone	C22H29FO5	150338	43568	132150	72176	125280	78796	103500	58346	129162	146810	81660	17996	115958	49196	167658	104158	156190	31642	78736	143108	101352	20354	107586	111898
225.96968 Da 703.49 s	11.72	226.977			1810	1932	0	2036	1940	1424	1402	1530	1538	1906	810	778	2018	1540	1742	1186	1574	864	1294	1918	1400	682	1806	1452
283.92799 Da 703.71 s	11.73	284.935			2468	1714	0	2286	1440	1344	872	962	1564	1880	524	718	1920	1714	1600	920	1674	854	1114	1932	1946	568	1682	1390
218.94754 Da 704.01 s	11.73	219.955			1910	3638	0	2588	3738	4540	3442	3282	3200	4026	872	738	5076	3228	3418	1870	0	0	1064	4850	3684	768	4322	3876
501.94671 Da 704.09 s	11.73	251.981			5100	4826	0	3604	3674	4354	3850	2924	3568	4354	2134	1532	6226	3430	4254	2354	3748	2276	3332	4852	3884	2016	4810	4218
116.08260 Da 704.19 s	11.74	117.09			2754	1768	2214	2102	2252	2044	2638	2350	2082	2348	1992	2556	3056	2176	2406	2248	2626	2096	2390	2394	1880	1942	3310	2676
512.09694 Da 704.64 s	11.74	257.056			23728	38944	0	47202	27856	41664	9128	5970	15560	45582	6130	2580	30384	17888	12376	2102	9440	3430	18166	24520	14780	5340	20924	22114
106.04088 Da 704.81 s	11.75	107.048			2830	3588	138	4998	2512	5038	1818	1334	1966	4270	1514	940	2104	3132	2132	1224	1666	1192	3436	3226	1886	1384	3436	2970
93.03321 Da 704.91 s	11.75	94.0405			5240	7370	266	10266	7778	11170	3074	2632	4684	9976	3698	2656	5148	6336	4386	2082	3328	3118	6842	7398	4014	2456	6644	6332
311.20888 Da 704.92 s	11.75	312.216			672	2278	738	6934	1074	1430	562	4414	654	1630	750	6970	1048	5690	0	2570	1246	5512	1920	4108	532	8462	498	1558
222.01924 Da 704.95 s	11.75	223.027			1872	2708	0	3134	1634	1844	1546	2060	1780	3184	704	520	2846	1452	1528	702	1186	734	1646	2376	1908	828	1866	2362
120.01997 Da 704.98 s	11.75	121.027			110146	166010	2606	217278	146002	205774	63716	52738	97990	220414	70290	47006	129470	121334	82254	43800	76890	53718	131634	145946	83400	57170	134292	135928
80.06200 Da 704.99 s	11.75	81.0693			1864	1856	392	2772	1980	2904	1128	960	1526	3526	1366	864	2006	1544	1526	1020	1314	812	1608	1818	990	996	1836	2310
441.25837 Da 705.19 s	11.75	442.266			26716	22248	8460	39800	25234	38628	9626	4800	19018	56056	11434	3236	20324	18272	17436	4586	12448	1410	28516	23682	18878	1462	27276	21658
1162.62612 Da 707.88 s	11.8	582.32			1356	470	9696	838	394	0	600	1132	852	1272	2992	6042	1310	910	988	3598	1390	720	74652	1732	17280	0	942	1092
1118.66150 Da 707.97 s	11.8	560.338			562	250	5482	0	0	0	136	0	654	670	1768	3590	0	0	448	1590	770	0	40196	574	5784	762	0	198
137.04644 Da 707.98 s	11.8	138.054	Anthranilic acid	C7H7NO2	198	0	0	0	192	0	0	0	140	0	5066	11776	7882	16470	8384	5794	0	2724	20032	22160	4194	3760	3994	8170
165.07903 Da 708.23 s	11.8	166.086	Benzocaine	C9H11NO2	664	0	0	0	0	0	0	650	0	0	6372	14472	11502	19862	10760	7356	0	4386	23218	27564	5064	4726	5454	9974
165.99939 Da 708.49 s	11.81	167.007			4812	2210	6428	4082	5468	2458	2260	2214	3770	3666	3992	7376	3970	4808	4556	3260	4512	4874	2714	3090	3702	1012	4118	2966
256.12694 Da 708.64 s	11.81	257.134			11656	8948	12460	8260	14462	8732	10096	10004	9636	14186	9864	8132	11684	10984	13488	10170	12514	9432	10778	9836	13736	5666	13884	11844
159.98259 Da 709.84 s	11.83	160.99			5398	3316	9870	3208	3576	1930	8216	6656	4858	3558	2764	4864	6480	4216	5018	6306	6114	9328	3674	3828	5872	3296	4398	4180
1206.65253 Da 709.93 s	11.83	604.334			1002	476	16844	902	572	0	512	1266	720	1292	5430	0	1210	1282	784	4124	1832	0	103990	1106	18930	0	840	0
198.12167 Da 710.59 s	11.84	199.129			15380	3160	8964	1924	7250	11610	11122	0	12710	11874	5374	0	6106	3922	13444	9698	15566	7870	0	11228	6086	3246	10690	14142
1162.68791 Da 710.71 s	11.85	582.351			0	0	10274	0	0	0	0	396	0	462	2402	3952	326	0	0	2068	1002	0	66762	616	9138	0	0	0
574.16442 Da 711.16 s	11.85	575.172			0	0	0	0	1686	1736	1656	2084	4196	1874	5470	524	2422	2856	4156	1270	4456	0	3060	3034	4496	0	6018	4770
316.18454 Da 711.27 s	11.85	317.192			7706	4158	6880	4274	6054	4892	6028	6180	6136	6834	5824	4204	5906	6336	6070	6744	7264	5790	4724	7692	6154	2382	7374	6646
632.12290 Da 711.34 s	11.86	633.13			0	0	0	0	718	700	586	860	1888	692	2368	0	1116	1288	1682	692	1940	0	1630	1520	2210	0	2812	1776
1250.67819 Da 712.01 s	11.87	626.346			0	0	21942	900	520	328	0	524	798	1412	5244	3864	1004	872	810	3742	1848	624	114444	1238	19340	0	522	534
1272.65884 Da 712.16 s	11.87	425.227			1910	424	52450	0	0	0	0	1006	1648	1340	7914	4382	2150	1206	0	8398	3572	0	136456	2022	36962	0	902	936
251.06743 Da 712.25 s	11.87	252.075			4254	1884	4216	3006	4188	2644	3898	3086	4354	3512	3092	904	3562	3790	4426	4566	4820	524	1968	4632	2370	0	4592	3660
234.17159 Da 713.42 s	11.89	235.179	LID_235.1805_10.1	C14H22N2O	891316	401396	0	603256	571162	0	565854	222962	812086	1202560	0	0	800850	461106	695444	242958	573326	67880	0	767384	0	0	755076	506802
1250.73980 Da 713.99 s	11.9	417.921			330	0	15230	0	0	0	0	634	674	396	3494	2498	548	292	336	2994	1390	0	111720	454	14594	326	0	0
1316.68633 Da 714.27 s	11.9	439.903			1914	540	81086	532	852	428	1056	1058	1792	1900	13228	1524	3260	1328	978	11108	3670	886	0	1552	58216	0	774	806
1294.70481 Da 714.32 s	11.91	648.36			576	470	20002	0	0	0	264	464	786	546	4376	0	930	726	466	3556	1238	452	85304	590	20246	0	594	438
178.05924 Da 714.41 s	11.91	179.067	4-_Dimethylamino_phenylthiocyanate	C9H10N2S	3442	1882	1902	2018	1734	2106	3312	1516	2536	3302	1142	1700	2182	2652	3068	2638	5114	2604	0	2966	1436	0	1622	3432
643.34190 Da 714.46 s	11.91	644.349			0	2016	0	3260	0	0	0	550	0	0	982	0	0	2842	0	378	0	1732	1578	0	0	0	0	0
602.68195 Da 714.81 s	11.91	603.689			0	1378	0	3968	0	612	0	514	0	0	1618	242336	0	2760	0	0	0	2656	1486	0	0	65784	0	0
663.25182 Da 714.81 s	11.91	664.259			0	1666	0	4456	0	608	0	336	0	0	0	301724	0	2602	0	0	0	2802	1348	0	0	64336	0	0
663.05135 Da 714.99 s	11.92	664.059			0	2078	0	7038	0	974	0	452	0	0	1574	529140	0	4862	0	730	0	4912	1978	0	170	124086	0	0
1325.70310 Da 715.63 s	11.93	663.859			0	3100	0	6128	0	858	0	0	0	0	1988	452022	0	0	0	0	0	3024	1218	0	0	94406	0	0
602.77339 Da 715.68 s	11.93	603.781			0	2324	0	4130	0	0	0	676	0	0	1314	237548	0	2860	0	290	0	2690	1464	0	0	61904	0	0
384.13808 Da 715.94 s	11.93	385.145			2940	1818	2196	1662	3070	1522	3016	2568	2348	2574	1838	2056	2840	3394	2862	2450	3128	2474	1590	2274	2242	0	3226	2758
1360.71243 Da 716.65 s	11.94	454.578			1330	382	83886	350	654	274	0	1218	1640	1870	12160	2120	2182	1438	1230	13332	3750	794	210142	1850	61732	174	714	664
1294.76511 Da 716.66 s	11.94	432.596			726	0	30294	370	0	0	0	424	888	510	6632	5854	1036	780	436	6300	1532	258	224220	620	26542	802	422	392
1355.75669 Da 716.70 s	11.95	452.926			654	266	30668	290	338	0	0	680	1160	660	4434	1068	0	612	0	7606	2098	300	99084	674	26346	0	408	402
278.03044 Da 718.18 s	11.97	279.038			13970	7936	13412	11080	13416	7222	9602	11102	11636	12278	9006	6558	12698	16194	14648	11260	14088	11278	7268	12728	11172	2828	13006	9594
1404.73811 Da 718.35 s	11.97	469.253			1244	504	70660	0	876	0	0	0	1776	1026	14288	2544	2074	1542	1114	10262	3150	876	193854	1440	55676	0	892	0
124.08764 Da 718.42 s	11.97	125.095			3276	1404	2300	2600	2472	3196	4092	4524	3270	3844	3676	2348	3688	2724	3838	3434	3826	4172	2498	3152	4196	2040	3316	3368
312.00771 Da 718.46 s	11.97	313.015			5470	2104	5336	3588	6058	3596	2426	3164	5914	4852	6442	3866	4090	6056	6528	4394	7318	2776	3890	4476	5054	1160	5256	4286
360.21156 Da 718.52 s	11.98	361.219			1856	1502	1780	1204	2278	1968	2452	3098	2744	3354	7554	986	2314	2288	2842	2372	2216	2144	2276	2712	1958	918	0	2668
1382.75780 Da 718.55 s	11.98	692.386			0	0	12588	0	0	0	0	0	0	0	2618	1302	444	228	0	1828	722	356	34550	230	9280	0	0	0
1338.79158 Da 718.65 s	11.98	447.271			1014	288	42316	486	0	0	0	762	858	1216	6384	6756	1826	696	0	7804	2594	504	344574	794	38090	694	0	0
440.25939 Da 719.44 s	11.99	221.137			0	0	7764	240	0	0	0	162	0	0	1794	2206	634	0	0	1966	728	0	77040	440	7062	0	326	0
1443.80870 Da 719.98 s	12	482.277			520	182	24132	254	182	294	0	490	782	0	4026	1188	1094	250	450	3812	1510	372	93936	572	22126	0	0	0
1448.76473 Da 720.23 s	12	483.929			876	0	57138	490	386	0	0	580	824	1086	10072	2186	2266	1308	498	8876	2732	0	165864	998	42360	0	0	0
245.23392 Da 720.24 s	12	246.241			3790	4522	5268	4856	3600	3774	4818	6016	4468	3508	3038	3630	4064	4414	4300	3250	4656	4880	2638	4616	5182	2758	5054	4334
1382.81750 Da 720.67 s	12.01	461.946			656	462	43302	224	0	0	268	516	934	682	8256	7602	1644	730	200	7650	1666	638	426444	480	37438	628	458	296
274.03102 Da 721.82 s	12.03	275.038			2972	1208	2824	1658	2676	1100	1258	1258	1924	2096	1686	1586	2248	2440	2200	1634	2832	1482	1174	1964	1668	618	2284	2094
1426.84336 Da 721.86 s	12.03	476.622			504	326	37960	364	0	0	0	454	634	958	5970	5610	1192	352	0	6012	1070	304	431450	812	32906	356	0	0
210.05559 Da 722.07 s	12.03	211.063			2156	1664	1742	1286	2018	1626	3052	2298	1806	2394	642	958	2784	1684	2024	1894	2152	2372	1374	2448	1942	668	2498	2060
227.15294 Da 722.10 s	12.04	228.16			1820	1168	1554	1838	2088	1368	1858	1530	1944	2394	1194	1798	1868	1568	2016	1674	1962	1688	1672	2086	1896	844	2002	1780
652.46081 Da 722.22 s	12.04	653.468			596	3256	0	58258	0	3054	432	1762	632	310	2346	198196	0	19220	0	20686	0	21436	3432	360	0	16304	0	636
1492.79082 Da 722.35 s	12.04	498.604			460	586	45370	210	0	0	0	476	602	490	6292	1612	1192	484	438	6442	2410	286	143398	672	34642	0	0	222
653.12869 Da 722.44 s	12.04	654.136			176	2256	0	23286	0	1314	0	942	204	0	0	83580	0	7206	0	7942	0	9416	2136	0	0	5902	0	484
1468.53985 Da 722.65 s	12.04	735.277			556	2084	0	59112	0	1672	444	1768	0	0	1722	0	0	18330	0	16888	0	22264	0	156	0	25982	0	0
652.34861 Da 722.75 s	12.05	653.356			0	1304	0	19174	0	1114	562	996	0	0	0	63886	0	6856	0	7354	0	5746	1960	0	170	6554	0	396
1468.28831 Da 722.83 s	12.05	735.151			0	0	0	55260	436	0	562	1376	330	0	1588	318836	0	16670	0	13600	0	17924	2328	0	294	23164	178	628
88.06288 Da 723.03 s	12.05	89.0702			5782	4020	7316	5696	7120	3614	6474	3890	5196	7666	5114	4658	6714	5356	6650	6290	4782	7320	5244	5708	7476	3670	6280	4994
1531.86166 Da 723.17 s	12.05	511.628			0	352	16788	0	0	0	0	0	0	314	2168	980	598	0	0	3114	508	0	67420	488	12960	0	0	0
1509.88199 Da 723.38 s	12.06	504.301			0	192	7570	0	0	158	0	280	226	0	990	1280	0	0	0	1036	0	0	40160	0	7368	0	0	0
162.05208 Da 723.51 s	12.06	163.059			1690	1396	1488	1038	1428	1188	2062	1332	1596	1998	1090	958	1430	1322	2996	1218	2874	1384	1204	2166	1864	380	1724	1218
653.24018 Da 723.69 s	12.06	654.247			0	794	0	10268	256	670	0	578	170	0	304	38706	0	4208	0	3338	0	4174	1188	0	190	3252	0	182
1536.81616 Da 723.77 s	12.06	513.279			536	280	37820	0	0	0	0	0	880	0	5694	1602	1102	0	0	5484	1772	0	114862	0	29686	0	0	0
1470.86952 Da 723.78 s	12.06	491.297			226	0	30910	0	0	0	0	0	0	760	4786	4922	984	364	0	5544	1706	0	330240	0	25910	350	0	0
162.03052 Da 723.81 s	12.06	163.038	Umbelliferone	C9H6O3	2832	2032	1784	1444	1894	2608	2818	2420	2336	3128	1630	1716	2688	2614	2304	2528	3624	2666	1494	2638	2084	1150	1750	2956
838.87998 Da 724.54 s	12.08	839.887			0	0	0	20382	0	240	0	414	0	0	0	281996	0	4020	0	3934	0	6872	712	0	0	25678	0	282
1580.84257 Da 725.27 s	12.09	527.955			378	440	37512	0	0	0	0	0	594	564	5078	1648	1134	686	296	4372	920	226	95580	532	24568	0	0	0
1575.88781 Da 725.35 s	12.09	526.303			0	288	17364	0	126	180	246	0	552	486	2072	1316	786	218	0	2734	762	0	66548	366	13016	0	258	168
1514.89539 Da 725.55 s	12.09	505.972			390	0	29046	390	0	0	0	342	354	376	3866	6122	1024	0	0	5024	972	376	255860	348	23386	0	0	0
1624.86969 Da 726.78 s	12.11	542.631			0	274	36354	0	0	0	0	462	568	250	3990	1240	970	0	0	4580	1228	0	92176	286	22182	0	0	0
1558.92123 Da 726.82 s	12.11	520.648			0	360	25140	332	0	0	0	0	472	374	3144	4772	638	496	0	3796	1360	274	206622	320	17286	492	0	0
155.12987 Da 727.00 s	12.12	156.137			3250	1998	3288	2230	2680	2146	3046	2186	2846	2826	2240	1558	3522	2138	2820	2762	3384	3078	3126	2884	2326	1448	2770	3600
823.42520 Da 727.04 s	12.12	412.72			676	0	38024	0	0	0	0	0	664	352	4058	666	660	380	0	3314	1730	0	51038	0	16578	0	338	0
185.21298 Da 727.24 s	12.12	186.22			1552	1398	1300	854	1398	1116	1920	1446	1348	1438	1050	682	1780	1742	1806	1608	1908	1468	684	1986	1542	568	2022	1898
1602.94626 Da 728.31 s	12.14	535.323			0	0	19188	278	0	0	0	0	0	572	2696	5706	822	0	0	3748	830	0	158548	0	12474	580	0	236
332.13489 Da 728.67 s	12.14	333.142			0	2062	0	7228	0	1040	0	4060	0	882	0	27930	0	5662	0	7518	0	3668	0	0	0	14660	0	1060
1663.94027 Da 729.01 s	12.15	555.654			340	0	12808	0	0	0	0	0	254	0	1290	1264	374	0	0	2178	504	240	51316	0	8174	0	0	0
1712.92178 Da 729.44 s	12.16	571.981			0	0	22404	0	222	0	0	324	374	384	2952	1700	452	0	0	2214	822	0	77700	0	12610	0	0	0
1646.97321 Da 729.66 s	12.16	549.998			0	236	15742	0	0	0	0	0	418	0	1946	4706	548	328	0	2012	380	192	133162	0	9900	0	0	0
867.45109 Da 729.98 s	12.17	434.733			632	0	45604	194	0	0	0	0	754	608	3136	0	902	0	336	3490	1270	324	72064	0	20008	0	0	0
1707.96657 Da 729.98 s	12.17	570.329			0	0	10422	0	0	0	0	378	354	0	1170	714	508	436	0	1686	0	0	48680	0	7134	0	0	0
889.46437 Da 731.27 s	12.19	445.739			566	0	40376	0	340	0	0	152	418	380	0	0	766	628	406	2946	1040	542	66170	830	17088	0	0	0
171.08819 Da 731.29 s	12.19	172.095			1606	4206	1372	4446	1268	4354	866	2094	1106	1894	644	8074	1178	2546	1598	3814	3258	12972	640	1310	620	5800	1580	8744
1343.47263 Da 731.31 s	12.19	672.744			0	6162	0	20234	0	518	0	1764	172	0	302	46644	0	4938	0	7522	0	14772	472	0	528	81992	0	0
1791.30470 Da 731.39 s	12.19	896.66			0	2234	0	11624	0	0	0	778	0	0	0	138996	0	2764	0	2586	0	9878	288	0	0	334098	0	0
458.13360 Da 731.51 s	12.19	459.141			0	0	0	0	990	1596	1248	3348	1614	2550	0	0	1252	1642	1984	1876	1880	1644	1550	1644	2054	710	1858	1960
746.44007 Da 731.58 s	12.19	747.447			0	0	0	0	0	1716	1046	19970	2022	2972	2696	2104	482	4128	1690	3516	2006	3036	2360	1456	2164	2832	2534	3080
1343.72281 Da 731.59 s	12.19	672.869			344	6206	0	21850	0	484	602	2634	0	0	0	45908	0	5652	0	5800	0	16070	726	0	0	84294	0	0
379.25509 Da 732.49 s	12.21	380.262			0	0	0	0	0	5330	6828	19782	6578	9164	5560	2146	5284	5968	7762	7752	8172	7514	5236	7524	7046	3310	9628	8244
208.06992 Da 732.59 s	12.21	209.077			5230	2580	4402	4402	4252	2688	3032	3328	3530	4000	2458	2322	3324	3118	4710	3290	3588	2848	2318	3324	3284	0	4170	3504
219.18199 Da 733.67 s	12.23	220.189			0	0	0	0	534	3786	960	738	2102	1864	780	1564	4892	3534	3090	3214	2116	690	1490	1516	3000	854	3894	4662
290.18646 Da 734.53 s	12.24	291.194	h_92_oxabolone	C18H26O3	0	306	0	0	10926	34590	30674	99210	38592	44466	42192	37230	25286	50724	35048	54622	41700	38046	38328	34836	38566	0	43752	46640
95.07267 Da 736.07 s	12.27	96.0799			3496	1170	2204	2120	2250	2520	3864	1202	2930	3698	1938	1128	2498	972	4542	3278	3558	2620	2398	4018	1932	1254	2502	3768
157.07286 Da 736.34 s	12.27	158.08			14020	3686	10734	4472	8850	10620	15544	3352	13008	14604	6404	1372	11120	3230	14944	12950	14926	6648	9800	15394	8036	3782	12542	10346
584.26106 Da 738.54 s	12.31	585.268	Bilirubin	C33H36N4O6	0	518	0	0	0	0	0	1348	0	0	0	26256	0	1718	0	3286	0	13470	0	0	0	20202	0	0
315.23917 Da 739.82 s	12.33	316.246	Decanoyl-L-Carnitine	C17H33NO4	7124	62268	12804	203844	8092	18182	3982	51684	13566	49964	20558	303372	14326	85644	18752	29896	58178	125904	21224	154132	12406	149388	6556	31040
412.24178 Da 740.06 s	12.33	413.249			0	0	0	0	1502	3148	2250	7444	5458	4554	3846	5622	4334	7198	3910	3282	3836	2212	11312	4980	5052	1978	6446	5150
116.08263 Da 740.40 s	12.34	117.09			2408	2306	2190	2152	2720	1974	3216	2366	2064	2808	1580	2374	2612	2662	2432	2826	3362	3234	2484	3382	2524	1496	3168	2596
326.13230 Da 743.46 s	12.39	327.14	NCGC00380409-01_C16H22O7_4E_-7-Acetoxy-6-hydroxy-2-methyl-10-oxo-3,6,7,8,9,10-hexahydro-2H-oxecin-3-yl _2E_-2-butenoate	C16H22O7	5908	3312	4996	3344	5026	2942	3920	3776	4092	3922	3430	2338	3942	3656	5096	3636	5168	3396	3250	4428	3950	1406	4488	4358
346.10072 Da 744.10 s	12.4	347.108			0	0	0	188	608	1254	758	1818	1404	1262	1862	0	1320	1506	1862	1276	1734	636	1544	1686	1772	716	1984	1616
490.27365 Da 744.95 s	12.42	491.281			3886	1804	3158	1780	3344	1918	2332	2738	3002	3530	2338	1170	3180	2638	3270	2604	3578	2606	3512	2950	2874	444	3004	3354
562.29460 Da 745.97 s	12.43	563.302			4478	1742	3288	2150	3454	1964	2378	2758	3250	4614	2262	1616	2426	4156	3724	2774	4848	3046	2890	3334	2596	582	3828	3818
241.27538 Da 746.29 s	12.44	242.283	dioctylamine	C16H35N	4978	0	6634	4034	4626	4358	5174	5038	4812	5524	2904	1822	6360	4492	5462	3530	6596	4044	3212	5274	5110	1764	5126	5314
339.23928 Da 746.48 s	12.44	340.247			0	1924	384	8398	432	828	0	1788	564	1540	0	6472	658	3518	410	1638	1144	5150	722	2626	0	6108	0	688
534.30034 Da 747.30 s	12.46	535.308			5300	4030	5454	4340	4410	3926	5222	6038	5316	5126	2826	2228	6778	4884	6650	3874	5728	4842	3334	5688	5770	1234	5192	4664
173.99797 Da 748.02 s	12.47	175.005			6810	4350	6580	3970	4926	2718	5748	5348	3798	5550	1808	1438	6354	3424	6284	4534	4902	5534	2442	5054	4756	1804	4262	4288
136.05036 Da 748.11 s	12.47	137.058			2052	1630	2276	1466	1834	1458	3150	2374	2076	2596	1290	770	2306	2098	3152	2042	3048	3116	1992	2132	2474	798	2028	1936
180.01493 Da 748.29 s	12.47	181.022			22594	9866	29886	14098	23448	9146	9784	8982	15754	14124	11612	6648	15878	15884	20154	12414	18650	12968	11422	14892	13932	2970	16556	13582
710.41897 Da 748.48 s	12.47	711.426			0	124	0	0	272	1726	0	10242	2028	2218	2250	5416	0	4686	1498	3276	1634	1576	1840	1938	1922	2498	2218	1882
578.32617 Da 749.29 s	12.49	579.333			12934	8722	13134	6614	10544	8204	12482	11152	13914	15022	8300	1762	11754	12364	14664	11716	13004	8784	7174	13456	13286	1788	14154	12800
240.13240 Da 751.31 s	12.52	241.14			13860	8888	15248	8488	12786	9264	11344	9116	13950	13018	10652	3396	14896	11440	17786	9608	16656	11408	10422	10192	12114	0	14026	15466
622.35210 Da 751.91 s	12.53	623.359			7580	2910	5670	2804	7580	3948	4574	5236	5194	7728	5380	0	6296	7890	7146	6160	6522	6348	4490	5122	3974	0	6210	7008
154.02938 Da 753.23 s	12.55	155.037	Gentisinic acid	C7H6O4	4276	3864	5072	3734	3336	3226	5118	3400	2668	4662	1388	418	4970	2284	3856	3424	3602	3726	2364	3296	3250	630	2950	3082
160.04751 Da 753.84 s	12.56	161.055			3010	2010	4640	2160	3402	1660	2116	1828	2090	2664	2744	0	2682	3248	2940	2354	3162	1712	2514	2392	2346	1006	2590	2806
273.26516 Da 753.88 s	12.56	274.272	Lauryldiethanolamine	C16H35NO2	21490	25412	40082	33834	21218	25814	28772	47126	21364	29038	15042	6632	27942	25720	31230	23350	28204	24698	17678	28658	43956	9600	32798	29020
190.13435 Da 754.44 s	12.57	191.142			1102	0	0	0	1522	1818	0	2578	2238	2230	0	0	2430	2086	0	1998	2334	1234	2002	2224	2014	1190	2886	2812
253.12965 Da 758.56 s	12.64	254.137			45746	21750	40314	31170	30192	25014	28688	18266	32484	40000	21802	3932	33388	23456	43834	28580	50926	31980	22146	36806	23922	4142	38486	40912
178.13446 Da 759.18 s	12.65	179.142			4296	2330	2464	2112	1254	974	2496	2972	1090	2918	0	920	2298	4208	1570	1876	1666	1986	2486	3898	4372	0	1894	2770
289.26006 Da 759.94 s	12.67	290.267			8788	14772	18296	14834	7612	11422	12132	18898	13978	9412	4566	3678	21014	8068	9278	8172	10126	5538	4222	11254	19104	7928	11256	10802
287.28081 Da 760.35 s	12.67	288.288	C17-Sphinganine	C17H37NO2	3842	4172	3744	9664	4458	2820	2658	7470	2362	7464	2908	9954	3860	13510	4716	2958	3354	4302	2438	3866	4584	3216	4168	3632
302.97161 Da 761.59 s	12.69	303.979			16138	8924	16948	7476	14838	7052	8914	9674	9898	13302	8304	2398	11508	9892	13318	9792	15038	9454	6888	10818	9856	954	13640	10280
239.18698 Da 761.65 s	12.69	240.194			5038	0	4162	1728	6536	1680	4794	3896	0	4108	1620	300	2836	4022	1240	3376	2218	2184	8392	2060	0	262	3374	2398
556.23747 Da 761.80 s	12.7	557.245			8574	4812	7448	3740	7840	3010	4202	4888	6004	7372	3668	1506	4374	6534	7574	6210	7482	5660	3092	5476	5966	796	5918	5136
199.22863 Da 761.96 s	12.7	200.236			1866	1672	1954	1206	1642	1368	1634	1794	1786	2006	1394	558	2290	1794	2024	1062	1494	1402	982	1278	1698	456	1760	1788
213.24418 Da 762.15 s	12.7	214.251			2244	1510	2780	1218	2992	1406	1610	2240	2416	2440	1050	612	2438	2470	2656	1380	2502	2028	1660	1670	2230	584	2276	2008
438.15301 Da 763.91 s	12.73	439.16			0	0	0	0	1452	1100	1488	3244	1910	1884	2990	0	0	0	1426	384	1782	0	2568	1592	3244	0	3984	1182
229.23902 Da 764.09 s	12.73	230.246	N,N-Dimethyldodecylamine N-oxide	C14H31NO	26404	47248	16456	40572	29070	21076	18922	217004	25988	59434	8112	19108	10444	48990	13570	33346	15932	22894	8462	21576	10784	7052	11632	14122
417.27078 Da 764.90 s	12.75	418.278			0	0	0	0	572	2936	2082	866	3564	3464	1538	440	12282	4350	8450	2322	7632	0	1432	6604	3058	230	4384	7362
287.24444 Da 765.86 s	12.76	288.252	Lauryl diethanolamide	C16H33NO3	4108	2296	6312	888	740	816	5246	10908	0	9420	2724	668	5804	21412	1036	804	0	1622	2722	7690	8654	1084	9232	2364
824.44760 Da 766.87 s	12.78	413.231			0	0	0	0	956	0	1304	0	2114	966	602	0	3370	0	7604	0	4116	0	10052	7144	14098	0	22004	10834
309.11777 Da 767.77 s	12.8	310.125			12366	8080	13936	9712	13066	5778	8704	9114	10508	12060	6546	4068	12768	10062	13594	8706	13180	11092	7374	10238	12204	3606	12240	12084
303.29079 Da 768.33 s	12.81	304.298			17960	10786	14078	21180	14936	8190	8690	27264	13072	18578	7184	10158	11652	22530	13658	17638	19008	22048	8034	13434	11492	10278	10818	14402
383.28677 Da 769.18 s	12.82	384.294			2192	1534	0	1366	2024	1370	2236	2330	1826	2944	1160	528	2866	2018	2798	1738	2626	1836	1508	2948	2746	670	2700	2516
162.06645 Da 770.12 s	12.84	163.074			16574	15262	12888	9778	14152	9738	16956	15076	13604	16394	8526	5078	15378	12134	14824	12846	17004	16696	13074	15752	11982	6514	14484	16354
104.02522 Da 770.25 s	12.84	105.032			2434	2302	2688	1806	2200	1908	3162	3176	2624	2576	1804	906	2364	2496	2766	3014	2664	3244	2546	2852	2346	1206	2610	3060
343.27031 Da 770.76 s	12.85	344.278	LAUROYLCARNITINE	C19H37NO4	4070	45910	11540	101634	4220	15298	2598	41748	8160	41958	15190	102020	12390	89698	12982	15660	30930	47442	13930	121444	14174	91770	5388	23366
484.31425 Da 772.20 s	12.87	485.322			0	0	0	0	0	830	1104	2016	1592	1810	598	536	1862	2060	2120	1248	2384	284	1268	1898	2410	342	2532	2936
381.28786 Da 772.51 s	12.88	382.295			0	2416	0	21056	0	3224	562	12430	824	7084	0	5566	1232	22988	972	3114	936	1612	0	2108	0	1508	1340	7630
453.24655 Da 773.08 s	12.88	454.254			0	0	0	0	0	1114	1138	526	1938	1514	0	0	2968	854	2438	1052	2872	0	890	2356	1404	0	1894	1820
272.08818 Da 773.23 s	12.89	273.095			45002	29508	36848	21958	35314	24820	41770	36030	35492	43954	21960	9560	44456	37262	43760	36212	43886	36272	33016	38860	31690	10398	41498	39594
212.06693 Da 773.23 s	12.89	213.074			49102	29904	36254	24414	39198	29120	42968	35014	37252	50732	26724	10576	47820	41296	54054	45700	49800	39326	34340	46330	31924	10206	46678	44292
202.08271 Da 773.36 s	12.89	203.09			49516	28392	40002	23536	37474	28508	44284	37870	37720	54580	25938	12326	44988	44240	48170	44878	48906	41292	36836	43798	34252	13436	45902	49828
156.04112 Da 773.36 s	12.89	157.048			35536	23784	27602	18312	26800	24972	33102	27058	28984	36812	20784	8982	34198	35912	36174	34248	32278	30266	27648	30768	24290	10536	33256	36284
114.03047 Da 773.42 s	12.89	115.038			2640	2088	1802	1302	1970	1698	2304	2200	2318	2214	1626	736	2816	2860	2588	2680	2124	2464	2054	2692	1848	834	2230	2502
137.99416 Da 773.50 s	12.89	139.001			8088	5574	5860	6000	6934	5910	8846	6896	6280	10032	4984	2472	7272	8310	8228	9090	7696	7606	7398	8828	5658	2930	7626	9666
370.15087 Da 774.49 s	12.91	371.158			0	0	588	0	1000	1560	990	912	3594	3326	7826	702	2242	2710	2470	1266	2424	0	784	2262	1236	584	1430	1362
269.19776 Da 776.73 s	12.95	270.205			3926	2414	3172	2150	0	2162	2768	3062	3380	3440	2168	952	3662	3382	4594	2788	3424	3742	2320	3130	3492	956	3594	2988
411.29666 Da 777.63 s	12.96	412.304			0	7806	856	35908	486	2276	318	7820	796	6360	1060	10694	838	18012	962	3510	1970	8820	718	6624	836	11902	648	2126
301.29642 Da 778.60 s	12.98	302.304	Dihydrosphingosine	C18H39NO2	10318	7150	13030	13122	9444	8042	9920	16702	7848	10854	6050	4994	7998	12576	10014	8062	11562	13858	6694	10540	13452	4164	10966	10530
176.04556 Da 778.99 s	12.98	177.053			3696	3286	3816	2430	3228	3220	3794	4162	3010	3874	2286	488	4008	3794	4370	3306	3774	4242	3166	4042	3282	1322	3478	3580
94.07746 Da 782.50 s	13.04	95.0847			1636	1016	1186	878	0	856	3064	1628	0	1696	0	708	1666	2366	0	1198	1468	1488	1558	1964	1426	0	1094	1750
494.17947 Da 782.59 s	13.04	495.187			0	0	0	0	2196	1892	3330	4520	5540	4252	5210	0	4562	2188	7810	2212	6434	0	6218	6432	10992	0	16202	5310
317.29134 Da 784.51 s	13.08	318.299			1626	1340	3050	1718	1186	1678	1940	3746	1944	1556	884	892	1586	1318	1692	1178	1202	1522	920	2526	2370	1442	2034	1668
183.16109 Da 785.48 s	13.09	184.168			1708	1274	1100	1720	1336	1210	1368	1510	1342	1870	1024	796	1298	1354	2844	1304	2156	1462	1828	2560	1378	536	1626	1886
343.23408 Da 786.00 s	13.1	344.241			0	0	0	0	640	4842	2058	2090	4194	4930	2730	3566	6836	9996	5110	7362	6568	3270	2176	3910	3540	3066	3708	6392
667.36694 Da 786.04 s	13.1	668.374			10674	3524	4810	4584	1760	1168	10356	4694	2298	10784	1446	1788	3032	15430	2364	3124	5578	4870	0	10280	2716	2362	2280	8218
810.31987 Da 788.66 s	13.14	811.327			15498	6174	5444	12538	5246	4496	7004	8266	8154	13844	2666	5526	3790	14824	14252	9164	11288	9734	3298	10628	4246	4780	7430	10926
455.30763 Da 788.93 s	13.15	456.315			1998	1204	1668	878	1442	1012	1838	1394	1322	2114	1100	0	0	1372	2198	1346	1890	1734	1106	1824	1430	500	1854	1548
286.07694 Da 789.10 s	13.15	287.084			4036	2508	4848	2830	4420	1782	2986	4002	2860	3900	2180	984	3350	4512	3838	2770	4016	3428	2976	3278	3478	814	4644	3408
485.27552 Da 789.10 s	13.15	486.283			3658	0	2486	1856	1694	1784	3234	1646	0	3076	876	550	1370	0	4290	2168	4408	3374	996	2544	1070	900	1940	3290
120.05630 Da 789.29 s	13.15	121.064	PHENYLACETALDEHYDE	C8H8O	13912	6062	4266	10368	3796	10218	16108	5496	12146	16090	2468	5446	4642	12288	18598	9396	17306	18232	3448	12624	4168	6208	5126	16990
734.36195 Da 789.35 s	13.16	735.369			0	0	0	0	388	3630	1756	1098	3658	4594	1042	7878	1686	12338	6520	5790	7792	2764	784	3976	1426	4866	2212	5736
174.06409 Da 789.39 s	13.16	175.071			3004	2108	5352	1872	4320	1244	1354	2874	2290	2802	2786	1102	4412	2988	2268	1508	2682	2002	2432	2008	3190	548	3882	1954
104.06159 Da 789.42 s	13.16	105.069			31902	12828	11538	19166	7756	19036	32040	13274	24328	34618	5856	14138	9850	24936	37604	18074	32408	31662	8290	27230	6436	14678	13304	32862
403.19777 Da 789.48 s	13.16	404.205			30210	11838	10266	13376	7822	15806	32406	13228	25194	33590	4706	6522	11522	21462	46290	19322	38062	28026	7648	30974	7224	7364	13838	37602
266.11252 Da 789.51 s	13.16	267.12	_E_-5-_4-methoxy-5-methyl-6-oxopyran-2-yl_-3-methylhex-4-enoic acid	C14H18O5	22598	9630	8890	13552	7274	13898	23680	10384	16416	22912	4270	8378	8812	17884	29396	13412	24480	20242	7278	20872	6566	8722	10834	24922
794.32517 Da 789.55 s	13.16	795.332			111168	23144	24028	65786	14092	40742	74320	23530	74590	80472	7980	43334	10950	95624	140732	51710	113694	76602	12074	82136	9772	33634	20410	97946
445.24445 Da 789.64 s	13.16	446.252			8262	3294	4554	3734	2858	3626	7232	4012	4806	5970	1190	1104	2128	6764	9752	4564	9124	7930	1932	5566	1332	1362	3636	8736
466.11111 Da 789.66 s	13.16	467.118			14758	5102	7392	6174	5812	5714	8342	4346	8974	11110	3144	2838	3860	8936	14346	5772	12032	8622	3120	9230	3560	2208	5468	10058
476.13994 Da 790.20 s	13.17	477.147			5976	1810	4214	2834	2596	2660	4092	2286	4938	5202	1992	1240	2078	4928	7620	3398	7472	4232	1720	4842	1894	850	2360	5920
508.29919 Da 790.71 s	13.18	509.306			0	0	0	0	804	1760	1212	3968	2188	2100	0	0	2186	3512	3080	2074	2632	0	2426	3008	3214	0	3408	3568
157.14554 Da 791.49 s	13.19	158.153			9720	9328	10792	8012	11560	8236	10402	12482	10250	11212	8038	7708	12672	10614	12266	8300	12276	13032	8498	10922	9218	7218	11590	11192
770.33872 Da 791.77 s	13.2	771.346			0	0	0	0	444	2378	1522	0	2874	2620	1114	1834	936	4758	2760	3202	3230	1182	620	2768	830	2102	1242	2778
610.33045 Da 792.78 s	13.21	611.338			0	0	0	0	0	0	564	598	460	384	636	0	1274	0	1856	340	1194	0	2618	2076	2010	0	2694	1922
441.32829 Da 793.33 s	13.22	442.336			4804	4294	4908	2928	5578	2734	5052	4594	4302	5860	2168	1548	6702	3644	5338	3796	5110	4912	2878	4524	4646	2544	4450	5330
806.43604 Da 796.20 s	13.27	404.225			0	0	0	0	1056	0	0	1922	1670	1424	970	0	5406	0	6504	0	4668	0	9584	7656	0	0	21804	9168
329.32755 Da 797.24 s	13.29	330.335			5292	4668	12516	0	4660	7390	9256	13460	6600	5026	3988	3714	4946	5676	5516	5178	6954	4332	3964	6236	11936	3838	6660	5900
738.39300 Da 797.67 s	13.29	739.4			0	0	0	0	594	1668	1170	4280	1666	2154	670	1376	478	8178	1394	2470	2136	1774	0	1600	810	1564	906	2436
262.04750 Da 797.72 s	13.3	263.055			1662	1278	2010	1128	1638	1098	1374	1504	1514	1440	1378	0	1760	1266	2488	1366	2000	1590	942	1486	1258	940	1496	1420
323.13303 Da 798.52 s	13.31	324.14			6744	4986	0	6190	0	5914	5274	4522	5902	8348	3480	3892	0	4722	7198	5776	6938	4082	2946	6942	3086	3330	5010	5630
294.21749 Da 799.57 s	13.33	295.225	13-OxoODE	C18H30O3	0	0	0	0	9186	30028	17100	82310	22186	28572	24022	20442	9774	32202	12890	35676	21880	20348	18964	14132	20240	22820	24494	27762
249.99127 Da 799.62 s	13.33	250.999			4918	3500	4730	3174	4012	3322	5776	3604	3598	4742	2890	2242	5132	4214	4628	4006	4496	4400	2694	7568	3216	2592	3840	4494
772.48384 Da 799.72 s	13.33	773.491			15768	6436	5866	11150	4350	3740	13880	4432	6646	10244	2646	6682	4848	13588	17254	5674	35444	8650	1276	9348	2762	4258	2562	17244
434.32370 Da 799.81 s	13.33	435.331			9838	5722	5782	4896	5928	4174	8810	5750	6328	8942	2448	1684	5824	10256	11278	6696	13476	8664	1866	8296	3508	1646	4316	9168
285.30147 Da 800.31 s	13.34	286.309			4304	2898	4484	2246	3796	2372	2858	3416	3256	0	2488	2236	4434	3958	3580	3256	4352	3850	2514	4014	3284	2610	0	3616
432.16489 Da 803.41 s	13.39	431.158	Benzyl alcohol _ Hex-Hex	C19H28O11	45354	33472	23184	40354	15024	49956	57554	39890	39586	37508	11974	55520	12960	61880	55544	43922	65362	53924	15646	38240	13516	53488	15328	51596
397.31711 Da 801.59 s	13.36	398.324			544	16104	854	81360	568	5942	0	11564	598	23632	1262	181782	328	47296	2040	8412	1566	14550	866	22628	1192	115338	580	5682
328.18401 Da 801.72 s	13.36	329.191			2438	1246	2222	1742	1848	1750	2160	1698	2008	2210	1664	1174	3008	2058	1918	1804	1722	2076	1606	1962	2528	1194	2296	2136
466.28859 Da 801.79 s	13.36	467.296	Cephaeline	C28H38N2O4	0	162	0	0	1932	5372	3080	10350	6984	5976	3992	7332	6306	8696	7914	6994	8204	2966	7264	7910	9778	5848	10044	8620
386.31274 Da 803.12 s	13.39	387.32			7740	4196	5150	3094	6498	3694	5592	5028	5304	7492	3674	3294	4356	5130	8126	6444	8914	6066	4418	7462	5714	2836	7132	6150
306.17972 Da 804.26 s	13.4	307.187	ML 236A_120179	C18H26O4	6792	4752	7092	4908	5862	4274	4860	7466	6784	6608	6244	5612	8138	7534	6680	7162	7126	6010	6024	7866	7200	4906	8218	6670
522.31463 Da 804.49 s	13.41	523.322			334	0	0	0	1318	2360	1626	6958	3192	2916	1238	2586	2506	3700	3046	2616	2852	0	2462	3202	3294	1682	4110	3134
150.13973 Da 804.75 s	13.41	151.147			2668	1984	1808	2012	2022	1552	2410	2578	1912	3044	1236	1304	2322	2634	2644	2940	2462	3212	1720	2652	1346	1714	2940	3286
295.21360 Da 804.80 s	13.41	296.221			13410	10156	16030	13300	10418	7756	13274	13818	11874	14784	6434	5478	14938	11062	11398	11956	12194	8374	8462	13936	12506	8008	11452	13034
482.10798 Da 808.14 s	13.47	483.115			4768	1834	3886	2468	3892	1864	2648	3076	2616	5480	1430	704	3284	3534	4774	2688	3430	2144	1308	3474	2784	912	3038	2274
826.31561 Da 808.31 s	13.47	827.323			3564	1750	2650	2602	2452	1048	1946	3328	1810	5892	1056	0	1874	3816	3708	2200	2732	1380	818	2536	2100	1110	3232	1794
284.15855 Da 808.35 s	13.47	285.166			5474	3424	6410	4216	5542	3024	4260	4596	6116	5898	4280	4198	3798	4596	5454	4846	6746	6166	4754	5424	4442	2916	6758	4994
282.10872 Da 808.36 s	13.47	283.116			22622	12520	17812	14614	16744	10408	17524	21552	16632	35712	7344	6466	20454	22918	24728	15952	17686	13056	10178	24158	15902	8296	22176	18088
492.13515 Da 808.49 s	13.47	493.142			4560	2498	5298	2918	4952	2084	2548	3394	4406	5974	2606	1090	4208	4922	4720	3458	4766	2576	2370	4060	4306	1088	4330	2864
164.04608 Da 809.00 s	13.48	165.053			2442	4460	2786	4654	1988	1700	1522	2260	788	1610	776	4536	1652	2430	1326	2968	1790	8584	1106	1332	1102	3504	1994	3730
580.35603 Da 809.70 s	13.5	581.363			0	0	0	0	878	1336	768	4248	1686	1874	1718	1758	1586	2246	1808	1566	1924	650	1672	1910	1892	1216	2160	2068
788.42828 Da 810.30 s	13.51	395.221			0	0	0	0	1036	0	1396	0	3118	2116	0	2722	9336	3130.82	14880	2440	9966	0	8734	14798	10690	0	18666	12094
802.42177 Da 811.79 s	13.53	803.429			0	0	0	0	562	246	518	1142	830	1042	612	832	928	1368	3518	956	2098	0	2944	4762	3804	690	6988	3868
357.35882 Da 812.07 s	13.53	358.366			1746	1808	0	2026	1782	2718	2256	4570	2448	1854	1190	1662	1654	1256	1732	1448	2224	1342	1286	2878	3882	730	2050	2052
499.37006 Da 812.29 s	13.54	500.377			4720	4470	4592	2890	3572	2300	4984	4052	3920	5554	1638	1070	5904	2808	3958	3820	4618	3436	1986	4238	2960	1864	3910	4020
582.36591 Da 812.85 s	13.55	583.373			0	0	0	0	1168	2636	1426	0	3118	2410	2606	0	2988	2162	0	1200	2748	0	3118	2668	3628	1506	4324	3682
490.25205 Da 813.63 s	13.56	491.259			2418	2014	2140	3344	1986	1662	950	2346	1614	2210	870	1800	1818	1876	1830	1662	2424	0	0	1786	1650	1294	1814	1586
824.40286 Da 813.88 s	13.56	413.209			0	0	0	0	0	0	790	1614	1862	2044	1642	866	2162	2000	6454	1664	4046	0	5980	7858	7712	1088	11354	5380
270.17919 Da 813.96 s	13.57	271.186			45652	8548	13436	16100	10908	9440	11630	8206	29692	15562	6906	5020	12232	10454	30642	33614	18410	17570	39090	29174	10654	5402	11276	16520
313.33279 Da 814.06 s	13.57	314.34			1886	1476	2636	1452	2184	1378	1688	2270	1730	2220	1136	936	2310	2418	2290	1934	1928	1666	1832	2672	2586	1254	1960	1896
422.13401 Da 815.00 s	13.58	423.141			9950	6436	9482	7502	9516	6338	5692	0	7760	13808	7110	2880	9264	8812	10840	6292	7844	4504	5646	8362	8904	3034	11612	8358
285.13476 Da 816.16 s	13.6	286.142	piperine	C17H19NO3	7288	3530	1120	8150	782	1808	0	1254	10972	43038	7420	79026	5950	45070	2772	814	1970	2632	8434	8728	1370	23432	2168	3040
474.32974 Da 816.41 s	13.61	475.337			0	0	0	0	1692	3492	1974	5922	3790	4242	1956	4756	4534	7094	5566	3954	5340	1274	4856	5230	6008	3008	6616	7462
429.37976 Da 816.62 s	13.61	430.387			5028	0	5082	3128	4530	0	3506	8908	3704	3886	2376	2734	4318	5852	3144	3086	3442	4300	2276	4420	3968	1800	3344	2728
188.07911 Da 816.70 s	13.61	189.086			21228	10102	22462	13084	19374	7734	12026	10458	14442	14408	12384	11418	16582	14234	16138	9870	15348	13962	10422	11856	12056	5950	12990	12438
205.14526 Da 816.88 s	13.61	206.153			7158	6252	2662	5628	6028	6484	2150	4288	2810	5720	1788	2914	1904	6454	1998	1608	3712	0	1218	2090	2076	2784	2346	4374
324.05197 Da 816.90 s	13.61	325.059			7104	2970	8220	3972	7972	2880	2564	2294	5610	4410	4648	2772	5618	3718	4772	3842	5226	3572	3852	3696	4130	1482	4094	3664
256.06527 Da 816.95 s	13.62	257.073			2158	1188	4014	1276	2296	1336	1212	1020	1644	1824	1266	1404	1720	1336	2266	1222	2468	1488	1382	1506	1620	868	1624	1462
314.02323 Da 817.03 s	13.62	315.031			6420	3180	7458	3226	6386	2652	2508	2272	4874	3486	4536	2534	4500	3984	5254	3192	4656	3782	3194	3460	4242	1302	3572	3486
425.34848 Da 817.62 s	13.63	426.356	Oleoyl-L-Carnitine	C25H47NO4	0	4064	0	52756	0	1034	142	9984	0	2628	1052	239918	0	39902	0	2310	0	7914	826	7594	0	139732	0	472
253.20380 Da 818.31 s	13.64	254.211			6624	2270	5082	2068	2460	1360	16324	8404	1262	7606	2082	2096	7480	10278	1762	2120	3842	3922	5990	9242	2654	3662	3068	5780
181.00078 Da 818.47 s	13.64	182.008			1220	988	1370	1266	1780	1460	1510	1584	1488	1938	1196	1300	1708	1918	1942	1156	1322	1352	1408	1234	1064	1136	1622	1650
336.09577 Da 820.37 s	13.67	337.103			9488	6024	9760	7254	10060	6030	8842	8124	9850	8300	7274	8240	8860	7452	10334	8418	10102	9512	7354	9062	10084	5492	9314	7192
171.16099 Da 821.77 s	13.7	172.168			6798	6148	5366	4436	4560	4726	6900	7442	4906	7160	3454	4666	5986	6294	6172	5588	5636	6964	4214	8344	7454	4470	5454	7454
284.12275 Da 821.89 s	13.7	285.13			3222	1734	2760	1846	2152	1548	2466	2296	2768	3078	1790	2922	2324	2422	3286	2416	3504	3046	1960	2942	2706	2408	3112	2680
332.19461 Da 822.08 s	13.7	333.202	NCGC00163645-02_C20H28O4_3-_E_-2-_1R,4aS,5R,6R,8aR_-6-Hydroxy-5-_hydroxymethyl_-5,8a-dimethyl-2-methylenedecahydro-1-naphthalenyl_vinyl_-2_5H_-furanone	C20H28O4	0	1734	0	2864	0	14248	5138	4780	12872	11678	7164	54848	17234	27816	22932	24154	22784	7026	6704	15454	10422	18636	11326	13818
620.38780 Da 822.08 s	13.7	621.395			0	0	0	0	1060	2700	1600	6732	2876	3020	0	3600	3756	4254	4532	3186	3598	980	3220	3812	4104	2550	5142	4136
502.21617 Da 823.62 s	13.73	503.223			0	0	0	0	522	856	724	1328	1636	1608	2306	1018	1554	1214	1542	1444	1974	0	1436	1452	2012	562	2558	1664
476.15234 Da 824.07 s	13.73	477.16			9616	6536	5790	5248	7350	5616	6388	7862	7888	9976	3360	4610	5476	9994	5704	4018	6180	6368	3214	7944	5556	2718	8180	9152
271.24999 Da 827.69 s	13.79	272.257			2898	1444	2296	7402	2782	1552	2534	2586	2908	0	1888	5334	2462	2578	2744	2790	2632	2804	1838	2696	2540	1182	2828	2620
110.10853 Da 828.30 s	13.8	111.116			1648	1186	1804	1058	1154	1570	1946	1270	1338	1740	1012	1324	1950	1488	1610	1886	1430	1668	1292	1826	1224	1348	1860	1970
444.22292 Da 828.40 s	13.81	445.23			0	0	0	390	1666	2492	818	1632	2658	2384	1140	1930	1942	2410	2754	2470	3970	0	0	5224	2100	1496	4870	7826
469.13334 Da 829.02 s	13.82	470.141			2638	1904	1756	2052	2838	1840	1530	2680	1242	3704	1308	0	1386	2920	2902	2232	1718	1600	1336	0	1930	1016	1960	2218
342.20045 Da 829.85 s	13.83	343.208			3036	2082	1652	2664	1902	1372	1350	1256	1296	2248	1738	2332	1760	2814	2080	1966	2352	2062	1782	1548	2182	1296	1660	1796
408.15465 Da 830.39 s	13.84	409.162			21890	10518	0	0	0	9266	14078	157778	17140	12516	2792	17550	10614	348576	131932	113450	155222	30700	74518	86332	0	6804	7356	34332
364.22108 Da 830.75 s	13.85	365.228			1320	0	1140	1216	4844	10766	4976	12994	12172	10018	7822	10880	9750	13918	13570	11710	13322	2174	11060	11976	14826	8074	15550	14434
592.35648 Da 831.60 s	13.86	593.364			0	0	0	0	1486	3552	2074	8014	3776	3936	2438	3772	3772	5850	4662	4524	4694	1046	3752	3578	5464	2898	4918	4954
157.95570 Da 832.12 s	13.87	158.963			15508	7844	20860	7836	17082	7834	6266	8300	13548	9458	17482	6422	11086	10958	13638	10046	13994	6006	9360	9742	12050	4172	11504	11086
225.94276 Da 833.38 s	13.89	226.95			15664	6228	19616	6968	14844	7438	7018	8098	12810	9912	13530	5734	12472	11148	15754	11238	14444	5754	10376	10660	12846	3368	11906	11440
488.34566 Da 833.55 s	13.89	489.353			0	0	0	0	4526	9948	4680	17352	7484	9134	2622	8544	7676	13522	10564	9960	10648	2638	8352	13044	15936	6880	21802	22882
239.22351 Da 834.91 s	13.92	240.231			3622	1814	2252	2256	1776	1520	2258	4332	2088	1678	1506	3520	3432	2218	2878	2342	2972	2856	2376	3050	2108	1314	1968	2518
392.12168 Da 835.10 s	13.92	393.129			2068	1506	2086	1470	2022	980	1600	1594	1532	2272	1736	960	1614	1928	2632	1502	2508	1134	1266	2616	2176	1138	2556	1706
328.22137 Da 835.11 s	13.92	329.229			16012	9670	14088	6852	11352	9482	14264	12894	11994	10508	9088	7468	14576	10048	10876	12446	15724	12784	10648	12958	13092	7172	14936	17488
564.36159 Da 836.41 s	13.94	565.369			0	0	0	272	3348	6926	3716	23704	7628	8312	5306	8446	6780	11268	7592	6240	7488	1484	6634	9132	9168	7562	11104	10142
338.06774 Da 838.98 s	13.98	339.075			12602	6310	11670	6868	12930	5978	7154	7530	10542	10578	11466	5700	10086	12094	13178	9056	14122	6832	9740	8286	9552	2748	11172	9906
270.08095 Da 839.00 s	13.98	271.088			6000	3006	5622	3468	6038	3220	4132	4276	5466	5608	3638	3308	5914	6514	6184	3992	6130	4000	4916	4908	4344	1338	4888	6098
328.03890 Da 839.11 s	13.99	329.046			6610	4420	9774	5930	8486	4744	4800	4954	8062	7530	8358	4432	8322	7610	7806	6100	8184	4300	7038	5260	6764	2294	6640	6938
305.23411 Da 839.22 s	13.99	306.241			1722	2368	2656	1760	1504	1296	1848	2524	2020	1856	880	588	3350	1512	2508	1472	2338	1254	0	1424	2280	1176	1526	1912
351.27327 Da 839.84 s	14	352.281			1792	1982	2286	2054	2056	1396	1716	1702	2352	2028	1594	844	2392	1388	1508	1478	2180	1192	1500	2164	2000	1306	1714	1670
550.34606 Da 841.39 s	14.02	551.353			0	0	0	0	2814	5676	4144	14762	8554	8492	5010	10660	9602	13948	10984	8386	11236	2064	9586	9752	12128	6754	13540	11400
496.33766 Da 842.38 s	14.04	497.345			0	0	0	0	0	1302	1056	3344	1584	1768	0	1438	0	2422	1942	1482	1816	0	1708	1936	1846	1284	2398	2660
380.25191 Da 843.72 s	14.06	381.259			1852	970	1910	1560	0	1258	1896	2156	2046	1654	948	1766	1964	1788	1648	1358	1788	2150	1354	1620	1746	1274	1482	1738
562.34641 Da 843.72 s	14.06	563.354			0	0	0	814	0	1014	966	2820	1554	1596	1432	1700	1204	1962	1230	0	1432	0	1264	1352	1530	2146	2224	1842
317.23141 Da 844.74 s	14.08	318.239			3800	2746	2384	3504	1884	918	5130	4594	2152	7266	1646	1140	3084	7066	1146	1078	1928	1764	1684	2140	1622	1492	2358	3458
502.36109 Da 847.01 s	14.12	503.368			0	0	0	0	870	1744	546	3770	1306	2176	616	2048	564	2866	0	1598	1512	440	1404	0	1860	936	4580	3230
456.26832 Da 850.37 s	14.17	457.276			10576	9874	16644	8130	9636	5494	7148	7374	7916	7750	4246	4762	6638	6744	9072	8712	9566	8582	5028	8774	7796	4728	8472	6156
1089.58992 Da 850.88 s	14.18	545.802			0	0	0	0	3324	9112	2862	20772	2128	6658	3546	2500	2122	6856	4686	2736	7486	828	3454	1278	1386	2258	4580	1520
1133.55379 Da 851.15 s	14.19	567.784			0	0	0	0	10250	23176	4588	45580	6082	16860	18114	10004	5150	21334	11348	7304	19156	0	8638	2842	3642	8182	10538	3510
1111.57158 Da 851.28 s	14.19	556.793			0	0	0	0	6576	15990	3920	36286	4448	13108	9902	5436	3444	12684	7988	4690	13804	1588	5964	2010	1976	5524	7108	3202
1200.53100 Da 851.46 s	14.19	601.273			0	0	0	0	0	9904	0	0	0	11866	4532	0	0	0	12484	0	15216	0	7960	0	0	0	10372	0
380.07271 Da 851.48 s	14.19	381.08			0	0	0	368	1948	3786	2536	2162	3932	5244	3068	3128	3862	6862	6094	4520	6366	2502	3630	4348	3214	2136	5604	3662
390.10121 Da 851.54 s	14.19	391.108			0	0	0	776	4150	10336	5822	5992	13056	11892	10626	10350	10062	20768	16856	15940	18804	7538	11020	12748	8172	6488	13674	12496
448.05964 Da 851.66 s	14.19	449.067			0	0	0	222	2174	3322	2472	1816	5224	4078	5324	4150	4398	6750	6660	5618	7038	2536	4192	4480	3230	2484	5434	3832
226.13390 Da 851.81 s	14.2	227.141			2662	2566	2846	2278	2190	2260	1972	1562	2160	2942	1096	3174	1528	2356	2130	2428	2422	2552	1508	1974	1666	2302	2482	2760
458.08861 Da 851.92 s	14.2	459.096			0	0	0	630	3942	7148	4490	4916	10528	10656	9416	6838	9298	15310	13174	12428	16792	5718	10432	9322	6984	4310	12154	9372
526.07595 Da 852.64 s	14.21	527.083			0	0	0	0	660	1286	860	1112	1714	1558	1682	950	1634	2978	2186	2196	3152	1070	1504	2160	1376	696	1964	1852
594.06320 Da 852.73 s	14.21	595.07			0	0	0	0	874	1484	1018	1066	2132	2052	1600	1502	1952	3512	2136	1778	3128	1260	1806	2026	1682	838	1934	1694
530.21061 Da 852.90 s	14.22	531.218			214	368	0	1676	786	996	870	6374	0	1642	430	16136	0	1414	492	2320	716	3154	256	1112	0	1392	1520	0
322.21053 Da 853.24 s	14.22	323.218			2312	2014	2336	2268	1962	2124	2648	3000	2784	3306	2042	3396	2800	2904	3218	2966	3324	2496	2772	3464	3264	2372	3180	3124
620.38857 Da 854.34 s	14.24	621.396			0	0	0	0	0	0	1112	3068	1502	1886	864	0	1838	1736	1956	1530	2960	0	1456	2152	2690	1556	2268	1786
194.16554 Da 854.84 s	14.25	195.173			1728	1286	1354	908	1626	1330	1860	1650	1722	1590	728	0	1932	1390	1400	1834	1848	1956	1784	1224	1740	1160	1356	1588
364.12698 Da 856.26 s	14.27	365.134			7502	5326	7522	5010	5650	4212	5604	6998	5624	6354	3928	4370	7370	5318	5604	6338	7180	6100	4528	6222	5616	5006	5394	6594
390.15501 Da 857.33 s	14.29	391.162			3620	3356	2204	5410	3754	2300	1360	4192	2074	9574	1194	2836	1860	8384	3998	3806	1968	3672	1070	4020	2122	2320	3702	5460
280.23717 Da 859.80 s	14.33	281.244	9-stearolic acid	C18H32O2	0	938	0	0	1322	2616	1950	6512	2628	4498	1650	3758	2510	4308	3330	3616	3190	1758	2854	0	4064	3404	5328	6854
428.21104 Da 859.97 s	14.33	429.218			426	0	378	622	798	1064	888	2220	1822	2054	1694	1584	1428	2592	1726	1632	1894	938	1584	1636	2060	1154	2892	2790
410.08458 Da 860.52 s	14.34	411.092			0	788	1150	622	1214	1188	1088	1160	1508	1512	1018	1054	1532	1732	2106	1252	1590	1046	1248	1520	1526	1070	1440	1498
216.10876 Da 861.04 s	14.35	217.116			23630	12688	17920	8696	19386	10726	13984	12900	15486	22654	11626	16096	16026	19996	21986	20088	20130	24738	12186	18830	12648	9026	14818	18394
532.19699 Da 861.12 s	14.35	533.204			1466	0	730	4470	1068	1574	708	3844	838	4310	618	13894	812	15788	1302	4874	1264	27210	528	2106	748	4768	1112	6754
342.05452 Da 861.17 s	14.35	343.062			3904	1642	3982	1342	4152	1948	2832	2414	3334	3432	3062	3316	3158	3216	4314	3688	3888	3244	2814	3834	2284	1456	3184	2916
186.16057 Da 861.19 s	14.35	187.168			2988	1684	1764	1814	2638	1724	2910	1996	1992	3358	1326	2726	2582	2802	3414	3130	2912	4534	2018	2688	1532	2008	2052	2952
284.09624 Da 861.38 s	14.36	285.104			4882	1968	3554	1590	3914	2468	2846	3034	2942	3866	2410	2700	3846	3916	3688	3426	4016	3640	2532	3516	2670	1588	2880	3522
204.07674 Da 863.58 s	14.39	205.084			3834	3266	3074	1830	2402	2616	3044	3994	2998	4400	1816	1864	4236	2920	3322	3194	3940	3818	2088	3410	3068	2130	2892	3280
1036.50118 Da 864.21 s	14.4	519.258			0	0	0	0	2436	8566	1132	14600	896	6444	4500	5122	792	7740	3964	3346	4300	800	2136	1082	1472	3098	2764	1482
260.06802 Da 864.63 s	14.41	261.075			3390	1000	3734	772	2214	2048	3544	1760	3894	3066	522	1028	1230	2206	2132	2360	2906	1472	770	3062	3882	1306	3078	3094
1014.51912 Da 865.03 s	14.42	508.267			0	0	172	0	1476	6360	842	9048	452	3916	1788	2282	596	4114	2368	2506	0	660	1176	706	744	1850	2264	1158
319.24756 Da 865.20 s	14.42	320.255			3806	5072	5814	3564	1882	3454	3808	5052	3174	4396	1990	1934	6698	4210	2464	2834	3638	2776	1534	3728	4846	3012	3560	4070
490.28862 Da 867.22 s	14.45	491.296			314	0	326	0	0	1970	0	2800	2090	2238	1480	0	1862	3170	2722	2468	2542	0	2712	0	2606	0	3668	3480
370.23122 Da 867.60 s	14.46	371.238			5606	4202	4642	9218	4600	4502	2622	7512	3752	7482	3196	8036	3840	11794	6386	5654	3934	5598	2960	5210	3432	3542	4844	5972
225.94265 Da 868.49 s	14.47	226.95			0	9040	24890	9144	0	10320	10352	11954	0	15280	23074	9454	18922	18072	23384	14742	22328	12002	14970	15900	17552	5520	19756	16972
157.95570 Da 868.53 s	14.48	158.963			0	10118	24910	10970	21916	11384	10298	11594	21232	15324	19666	0	17388	19226	21502	14260	23958	12128	0	14670	18024	5342	0	17748
276.11104 Da 873.15 s	14.55	277.118			13496	8654	5268	11912	8108	10128	5854	9000	7528	15744	0	14374	8226	16684	7786	7990	10588	8912	2916	8204	6274	11870	7342	9052
190.07690 Da 873.75 s	14.56	191.084			9218	9204	3604	10516	6176	10132	6034	9098	5416	11306	4472	11012	7754	11128	5624	6464	7904	7828	2606	7062	4926	12696	6378	7766
370.31773 Da 874.38 s	14.57	371.325			5150	3688	3122	3520	4280	0	4334	6236	3720	3786	2334	3894	6976	3198	4296	3780	3970	3572	2772	4640	3780	2524	4230	2732
203.13306 Da 876.04 s	14.6	204.14			4254	2688	4022	2128	3286	2722	4892	3880	3338	3988	1918	2020	4132	2858	3864	3476	3226	4496	2292	3656	2942	2188	3748	3066
570.40870 Da 876.38 s	14.61	571.416			20974	27960	20622	55890	23016	22344	13382	83678	15482	52730	9090	27950	15216	94482	30814	25024	13544	31328	5980	33404	15708	25780	31596	22578
634.40335 Da 876.53 s	14.61	635.411			0	270	0	0	2106	4268	0	11582	5126	4876	2322	5750	5666	9550	5024	5332	6230	1042	4798	6786	7216	4226	8554	6090
182.16569 Da 876.63 s	14.61	183.173			7268	9284	5790	13512	7344	7636	7310	24462	5332	14680	2986	4666	7126	18760	7456	7948	4142	10904	2926	9414	5862	6412	9600	7114
94.07749 Da 876.68 s	14.61	95.0848			1680	2294	1108	2042	1264	1680	1370	3708	1012	2862	722	1150	1614	3596	1424	1370	902	1708	612	1782	1036	1534	1488	1536
273.13255 Da 880.86 s	14.68	274.14			1114	2732	866	2328	844	1628	780	1946	1038	2186	608	3834	1108	3230	926	1540	1808	3734	510	782	862	2790	1140	2968
366.09949 Da 884.39 s	14.74	367.107			1928	956	1420	698	1636	1038	990	0	1644	1782	1302	692	1626	1160	1606	1100	2158	1012	1310	1562	1234	416	1560	1722
224.17437 Da 886.85 s	14.78	225.182			4658	2718	4104	2168	4716	2420	3916	2890	3636	5540	3324	1808	4332	4400	3014	2974	3730	3874	3328	3774	3518	1522	3404	4162
264.11092 Da 887.22 s	14.79	265.118			4452	3726	5054	3376	4772	3034	3904	3814	4652	4724	4150	1714	4496	4566	3430	3488	4600	3660	3608	4060	4316	1436	3554	4454
557.26857 Da 887.72 s	14.8	558.276			0	612	0	6286	0	0	0	1298	0	586	0	17824	204	7232	0	908	0	4454	0	352	0	11010	0	0
424.20555 Da 887.98 s	14.8	425.213			30456	16294	24608	13988	23212	11408	19766	21712	20346	35956	15654	16360	21668	30936	13438	16520	15786	20646	15472	23360	18620	17240	14100	28262
668.40903 Da 888.85 s	14.81	669.416			5142	1976	3314	4464	4474	878	982	2316	1592	4026	1722	1606	1790	3130	1184	2142	2120	2390	1792	2516	1764	1110	2154	2362
448.27807 Da 889.45 s	14.82	449.285			11014	10856	13426	14182	17278	5436	3522	5148	5926	13922	4602	5754	5564	8646	5342	6298	7666	3002	6616	6114	8860	4258	10394	9654
624.38296 Da 889.86 s	14.83	625.39			12048	6230	9908	11530	7878	2334	3202	4616	4768	9332	3672	4250	4534	5796	3256	5506	4232	5336	3056	5960	4980	3324	5108	6736
580.35681 Da 890.44 s	14.84	581.364			12248	7560	13662	13126	9324	1998	2922	3504	3408	9066	2558	2990	3990	4032	2602	3930	3640	3432	2372	4868	4026	3678	4734	4714
619.42740 Da 890.48 s	14.84	620.435			3128	2186	2184	2452	1886	634	1072	1504	1488	3230	436	754	1294	1512	706	1556	1134	2134	694	1750	1128	854	1502	2262
620.40857 Da 890.68 s	14.84	621.416			4090	3298	3220	3724	4008	2318	2146	4458	3000	4674	2208	3530	3438	6862	2458	3396	2702	2808	1604	3500	3114	2510	3974	4362
576.38317 Da 891.15 s	14.85	577.39			7882	5186	6246	7328	8526	4308	4074	9956	7244	10420	3820	7046	5434	13068	5868	7780	4988	6370	3666	6756	5032	3772	7868	8674
536.33053 Da 891.17 s	14.85	537.338			10068	5654	9710	10890	7654	1478	1692	2134	2110	6964	1438	1596	2220	2272	1058	2316	2418	2472	1300	2938	1542	1438	3096	3072
571.42730 Da 891.36 s	14.86	572.435			1818	0	838	1420	1760	976	1266	2300	1366	2668	508	994	1482	2854	1180	2040	1170	2290	620	1918	1202	918	2136	1998
492.30394 Da 891.41 s	14.86	493.311			9664	6976	11320	10792	10108	1080	1268	1660	1512	7538	1146	2466	1728	2402	1594	2676	1862	2468	1198	2008	1852	0	2814	2526
527.40144 Da 891.68 s	14.86	528.409			2694	2198	2206	1732	2802	1448	1956	3076	0	3852	678	1264	2512	4220	1968	2802	1922	3890	850	2752	2136	1296	3020	3036
262.18959 Da 891.88 s	14.86	263.197	3-methoxy-2-_3-methylbut-2-enyl_-5-pentylphenol	C17H26O2	5480	3384	4282	2956	5164	2590	4278	4166	3834	5078	2890	2560	4304	4368	4296	4354	4940	3888	3276	0	4254	2460	5732	5378
539.29669 Da 891.94 s	14.87	540.304			460	1118	204	10174	426	444	0	0	146	1492	0	35110	0	8214	210	2694	0	8762	0	476	0	19818	0	408
395.32289 Da 892.17 s	14.87	396.33			0	2356	1768	2458	2920	2026	3316	4028	2854	5374	756	1946	3500	4302	2192	3562	2364	2476	1202	3034	1708	1434	3000	3058
483.37532 Da 892.18 s	14.87	484.383			4224	3822	2370	3174	4522	2850	3842	5152	3794	7422	1474	2380	3860	5886	2930	5042	3626	4558	1430	4636	0	0	4872	5052
324.15353 Da 892.35 s	14.87	325.161			2744	3124	1248	4652	0	0	1732	2864	1726	4234	1090	2162	1860	0	2246	1890	1990	2524	818	2246	1030	1404	3110	0
439.34906 Da 892.70 s	14.88	440.356			7730	5654	3546	5896	7532	4904	7320	9562	5376	13444	1954	3516	6174	9598	4990	7912	6460	6488	2488	6454	4448	3958	7954	6998
429.90475 Da 892.98 s	14.88	430.912			3840	1660	3774	1782	3902	0	0	0	3040	3218	3444	0	3746	3836	0	2936	4310	2148	2918	3014	2958	0	3420	3060
414.27274 Da 893.43 s	14.89	415.28			0	1918	0	10430	0	0	0	1138	0	3122	0	15242	0	4142	0	9906	0	47154	0	0	0	18166	0	1080
361.91738 Da 897.32 s	14.96	362.925			4148	1750	3064	1872	0	0	0	2016	3202	2628	3390	0	3292	3552	3954	2842	3596	2244	2776	2348	2568	0	3028	3146
110.10851 Da 899.54 s	14.99	111.116			2082	1370	932	1262	2206	1442	1774	2176	1678	1616	1046	920	1636	2230	1826	1606	1560	1782	1306	1746	1670	1340	1782	2062
225.94268 Da 899.98 s	15	226.95			25992	12616	26890	12296	23522	11412	0	13888	22914	18128	23466	8174	20360	21662	26198	17508	27358	12108	20672	18870	19628	0	20700	20532
89.96861 Da 900.51 s	15.01	90.9759			0	5230	11036	5946	9830	5316	6232	6672	9404	7400	10950	4378	9420	8954	12332	7922	11024	6046	10784	7614	9416	3292	7592	8562
454.30369 Da 900.62 s	15.01	455.311			382	2838	0	10286	0	852	0	4404	244	1752	0	15578	0	5696	542	7624	1338	20564	238	1084	412	13788	0	1628
157.95570 Da 901.09 s	15.02	158.963			26830	13490	27714	13058	25654	12630	13738	14684	23928	18324	28424	10316	21428	22742	25864	18790	29292	11756	20304	17466	20770	0	18894	21650
583.28418 Da 902.08 s	15.03	584.291			912	1686	244	15720	452	410	0	3502	0	1228	420	34198	182	11772	526	2608	574	8038	256	566	572	21312	0	516
328.23350 Da 903.65 s	15.06	329.241			1946	1468	1524	1290	1770	1164	1582	1910	1342	2120	1472	0	2046	1876	1960	1556	1884	1478	1298	1716	1848	0	1686	0
394.13101 Da 904.58 s	15.08	395.138			1934	1006	868	610	1304	696	820	1206	1294	1784	1134	372	1106	1740	1660	1522	2140	978	682	1268	690	234	1142	1734
244.14063 Da 909.50 s	15.16	245.148			34118	21828	22550	14636	24822	19922	15648	16304	19666	31946	15120	25794	20576	20894	28910	26820	37830	53962	11288	31072	16164	9726	24172	42416
380.11457 Da 909.70 s	15.16	381.122			7244	3382	4470	2156	5796	3034	2820	2798	4880	7112	3482	3816	3854	5176	8418	5862	8342	6776	2376	6574	3464	1366	5146	7774
370.08639 Da 910.03 s	15.17	371.094			3872	1614	2878	1790	3012	1884	1562	1390	2294	3506	2042	1926	2440	2062	3404	2888	4134	4254	1308	3124	2088	880	2632	3786
200.17621 Da 910.10 s	15.17	201.183			6420	5542	3872	3214	4280	5634	4668	5408	3668	7800	2208	7894	4278	5118	5652	5856	7504	16136	2056	7228	3292	4428	5252	7878
589.31211 Da 910.29 s	15.17	590.319			0	392	0	5692	0	0	0	2226	0	408	270	63402	0	7530	0	890	0	6604	222	0	0	40840	0	0
398.26263 Da 912.80 s	15.21	399.27			1944	3114	820	6990	1910	1238	640	9020	692	4024	458	2022	1744	15174	1020	2184	1142	3010	682	5382	576	2236	3092	2180
238.18936 Da 913.80 s	15.23	239.197			129366	85688	129780	66452	110098	74892	96854	94270	131506	127774	96522	28822	116438	102912	132924	110990	125360	93698	99914	101884	96428	24184	119824	91436
301.23635 Da 914.04 s	15.23	302.244			2756	5502	4944	3646	2310	2434	2922	4180	3506	2558	1798	540	8766	1930	2912	2704	2750	1360	1328	3282	3224	1222	3448	2310
633.29972 Da 914.36 s	15.24	634.307			0	440	0	3946	0	0	0	614	0	0	0	22160	0	3450	0	568	0	2404	0	0	0	10564	0	0
599.27063 Da 916.46 s	15.27	600.278			0	592	0	4800	182	0	0	958	0	590	0	13520	0	3672	0	896	0	3448	0	0	0	8670	0	0
609.29962 Da 916.90 s	15.28	610.307			558	1080	0	14308	0	388	0	2040	0	1394	404	59618	0	11626	226	3454	0	9966	492	0	0	34690	0	274
428.30935 Da 918.76 s	15.31	429.317			5472	4170	5120	4444	5636	4444	2658	4790	4218	9222	2510	3610	4026	5916	6564	4898	5428	3758	2604	4662	3948	3306	5492	5568
414.29392 Da 918.85 s	15.31	415.301			10748	6676	10874	5616	9528	6360	8398	8272	9106	9480	7660	3904	9120	7134	9696	8762	11272	6922	7602	9382	9668	4824	9266	9666
150.08806 Da 918.92 s	15.32	151.095			5622	3158	4420	2290	3420	3218	4340	5232	4034	5206	2068	1676	3802	3694	4736	3784	4342	3784	2514	3984	3718	2246	4128	5130
458.32013 Da 919.13 s	15.32	459.327			3336	2126	3152	1792	3232	2404	1868	2674	2360	0	2306	1692	2566	2028	3376	2890	3088	2114	2590	2928	2258	1402	2672	2660
364.18450 Da 919.17 s	15.32	365.192			1722	992	1606	758	1614	1030	1472	1454	1374	1294	2428	1044	1504	1516	2072	1428	1554	1348	1230	1748	1528	862	1552	1724
638.39845 Da 919.30 s	15.32	639.406			4464	1758	2324	7990	3368	2632	792	4190	1540	4692	1306	4536	1412	5946	2034	2684	2592	4144	1594	3456	2074	1988	5222	1820
594.37231 Da 919.76 s	15.33	595.38			6854	2878	3428	18510	5960	3880	1582	7348	2218	9030	1922	8550	1898	10808	3176	5306	3206	6346	2400	4094	3652	2532	10348	3262
550.34621 Da 920.35 s	15.34	551.353			6766	2842	3064	22192	8182	4416	1384	8618	2336	12418	1862	7066	2348	12712	3348	4854	3268	4142	2482	3846	3276	3336	9412	3710
506.32004 Da 921.30 s	15.35	507.327			6384	4034	3780	20938	7778	4800	1638	10550	2220	18240	1754	8120	1762	16860	3696	5850	2682	3546	1588	3406	2838	2746	10030	3574
462.29393 Da 921.49 s	15.36	463.301			8028	6106	6096	31924	13250	7830	2174	17670	3446	32540	3388	15732	3112	32218	5644	7366	3776	5470	2070	4804	3368	3780	13482	5564
418.26796 Da 922.03 s	15.37	419.275			8676	6618	6860	35182	13936	11378	3610	23490	5068	47196	4474	18646	3984	53438	7854	8116	5550	5306	2820	5514	4124	4964	10718	7714
382.18508 Da 925.05 s	15.42	383.192			1546	3070	280	3724	1006	746	770	7286	0	3666	0	1776	1990	10294	0	1354	506	2268	0	5956	510	1064	4036	2150
392.21309 Da 925.57 s	15.43	393.22			3438	9644	808	12108	2762	3080	2520	33758	1134	12112	666	4232	5838	44096	1410	3174	1354	6460	270	19136	1520	4132	12722	8732
210.19692 Da 925.76 s	15.43	211.204			4332	14908	662	18502	3474	4014	3084	76718	960	14074	464	6982	6598	92628	970	3710	1074	9538	398	34854	1110	8998	14848	9616
626.47103 Da 926.01 s	15.43	627.478			13784	82612	1086	118180	6748	11914	4330	468756	1906	77124	554	46336	32758	635924	1698	11494	1146	37150	0	179216	2102	43622	96448	49698
270.15518 Da 928.62 s	15.48	271.162			2850	1434	866	1486	1698	1164	880	0	1288	0	1030	6432	992	2128	1582	2166	1766	5276	624	680	972	7044	1060	3000
960.52306 Da 928.66 s	15.48	961.53			0	2684	0	14470	0	626	0	41382	0	3436	0	15126	684	93908	0	766	0	1438	0	22484	0	10840	1508	2722
373.29390 Da 935.70 s	15.59	374.301			1802	4860	1126	746	970	554	930	31074	742	7130	638	718	4198	67496	620	364	574	1082	484	27544	754	798	3610	3840
618.42978 Da 937.53 s	15.63	619.437			2794	2672	2328	3596	3972	2938	866	4248	1940	5854	1682	3834	1062	5792	3340	2752	0	2316	1202	3562	2590	2624	2884	3254
574.40380 Da 937.99 s	15.63	575.411			3612	4630	3034	4496	4964	4052	1506	6196	2322	8590	2160	4658	1672	6840	4836	4198	3028	4100	1648	4806	2944	3610	4788	4090
585.29968 Da 938.25 s	15.64	586.307			542	2994	0	17680	354	424	268	13426	0	2660	266	45558	384	41670	0	570	0	4168	224	3280	0	30864	504	1368
530.37735 Da 938.82 s	15.65	531.385			4530	3864	3726	5452	5478	4216	1538	5326	2986	9514	2734	4980	1732	7876	4386	3600	3148	3714	1396	4276	2892	3130	4552	4224
486.35131 Da 939.19 s	15.65	487.359			5200	6344	4946	6926	7520	6394	2206	8640	3250	13956	2824	4892	2532	10666	7154	5694	4812	5060	2328	5178	4214	4096	6382	7148
310.24677 Da 939.72 s	15.66	311.254			5812	5116	4428	7768	5550	8214	3158	8252	3700	15462	3638	6834	4974	9788	4514	4838	5760	5546	3060	6030	3770	5630	6186	6302
442.32516 Da 940.54 s	15.68	443.332			13560	12176	10432	12694	14830	14138	4656	17048	7364	29474	6598	12916	5576	21596	14388	11332	10560	8414	4606	12242	8342	9334	13068	15030
398.29896 Da 940.91 s	15.68	399.306			10838	9140	7762	9778	10954	10968	4318	12606	6616	23728	4122	9636	4866	14590	11334	8800	10412	7332	3180	9744	5362	6342	9184	11744
604.41435 Da 943.15 s	15.72	605.422			1812	922	1262	2558	2728	2768	0	2108	1696	3368	840	2328	964	1682	1386	1370	0	2280	944	0	916	1906	0	1278
252.20559 Da 944.20 s	15.74	253.213	Ambrettolide	C16H28O2	6182	4124	5482	3112	5290	4078	4466	4312	4792	6024	4552	2466	4288	4462	5630	4224	5968	4866	5342	4574	3810	2810	4636	5048
682.53394 Da 947.25 s	15.79	683.541			304	574	2130	1318	40448	6378	1210	11670	864	460	2600	0	212	0	444	3286	640	0	762	304	35732	0	1762	848
296.23141 Da 948.84 s	15.81	297.239			5956	3798	5934	4084	5642	3614	3908	5674	4578	5462	4302	3010	5402	6520	5786	5102	5884	5290	5690	5398	4376	2630	5326	5202
256.17889 Da 949.53 s	15.83	257.186			2008	1160	1502	1134	1282	1104	1322	1534	1370	1900	1182	1078	1516	1362	1908	1482	1544	1252	1392	1528	1490	850	1390	1830
264.20521 Da 949.83 s	15.83	265.212			3630	3384	1804	2498	2232	3450	1656	2670	2252	5210	1322	1512	1960	4904	2822	3026	3704	3774	1728	2868	1460	1286	3140	4624
281.27028 Da 950.09 s	15.83	282.278	Laurocapram	C18H35NO	3040	6030	4308	4596	3108	2510	4620	5822	3238	3350	1196	774	10708	2008	3034	3144	2842	2666	1596	3390	6654	2592	3658	3452
170.12944 Da 951.48 s	15.86	171.137			3180	3144	3092	2272	2754	2844	3482	3656	2710	4278	2588	1842	4000	2824	3456	2938	2928	3156	1958	3094	2802	1772	3322	2980
543.32838 Da 951.74 s	15.86	544.336			552	2938	0	36040	220	0	0	18724	0	2226	416	289534	0	48206	292	2008	0	8076	0	1768	0	136826	470	506
338.24152 Da 955.66 s	15.93	339.249			9858	34744	1194	27504	3538	7406	6852	167596	2138	30698	1110	15496	23726	187266	2052	2990	1544	9730	890	91410	1800	11568	56422	25350
409.84693 Da 956.89 s	15.95	410.854			2766	1348	3058	2026	2528	1420	1270	1322	0	2594	2784	1532	2436	2864	2942	1940	2710	0	2270	1724	1680	1064	2008	2598
89.96855 Da 958.32 s	15.97	90.9758			10466	5510	10922	4590	9764	5910	5218	5714	9072	8814	9986	4746	8874	6938	10900	7804	10568	6344	8930	7540	7962	3224	9124	9356
549.61861 Da 961.16 s	16.02	550.626			8404	5320	7340	5350	6428	3668	4156	26896	5564	7888	0	0	8616	11888	6888	5336	6196	4018	3938	7640	7322	0	7540	6386
215.91392 Da 962.65 s	16.04	216.921			13142	6044	14360	8084	13168	7636	6218	6004	12196	10192	14148	6412	10882	11122	14502	8794	14084	7262	10352	9344	9464	4748	11724	9034
324.20403 Da 967.38 s	16.12	325.211			2340	6680	730	3706	934	2698	868	5858	856	2104	2080	8216	642	6994	1086	1684	1066	2372	2418	804	884	6656	0	1718
340.15846 Da 971.73 s	16.2	341.166	_2R,3S,4S,5R,6S_-2-_hydroxymethyl_-6-_4-hydroxy-2-_3-methylbut-2-enyl_phenoxy_oxane-3,4,5-triol	C17H24O7	1620	1040	844	1056	866	1194	698	1356	762	1052	744	2930	954	2252	886	1684	1160	2550	604	928	674	1546	1088	1776
126.13976 Da 987.25 s	16.45	127.147			1174	1884	0	2070	358	688	1196	4498	208	2564	0	1148	2774	6898	0	374	0	878	0	2694	0	1292	2898	2364
164.15532 Da 987.38 s	16.46	165.163			2242	3076	0	2912	454	990	1480	6530	358	3928	0	1600	3688	9774	210	304	274	1144	0	4666	368	1874	4144	3804
84.09333 Da 987.72 s	16.46	85.1006			2066	4058	0	3812	416	948	2134	9192	382	5290	0	1984	4878	11080	0	0	0	1406	0	5176	264	2542	5066	4900
80.06207 Da 987.91 s	16.47	81.0694			1806	3434	0	2800	484	924	1624	6976	404	4062	0	2468	3216	9768	178	174	336	958	0	3920	198	1808	4852	3896
624.20656 Da 987.96 s	16.47	625.214			1656	1522	200	1272	996	558	1086	2542	702	2204	0	938	1916	1932	530	756	434	1034	0	4272	532	726	2320	1972
150.13976 Da 988.04 s	16.47	151.147			2200	3900	0	4838	690	1046	2326	9208	402	6586	0	2462	5300	11328	376	682	0	1094	0	5312	372	2696	6042	5062
293.93002 Da 988.07 s	16.47	294.937			0	1912	1144	1618	2428	1198	1944	2842	1660	3708	0	0	2208	2620	1564	1858	2104	2020	1034	6054	1416	0	3278	2872
1375.02816 Da 988.20 s	16.47	688.521			1516	2940	0	2606	258	376	1094	15286	0	4492	0	1168	3474	9752	0	0	0	612	0	6080	0	1408	4682	3782
1028.77406 Da 988.24 s	16.47	515.394			8040	22608	188	24096	1060	3322	7056	106110	646	28372	0	7218	27060	68452	386	500	246	4630	0	47438	360	8728	29098	25354
420.24456 Da 988.25 s	16.47	421.252			42554	27738	6082	35916	28260	20330	24354	56356	21236	49884	3730	25910	39514	55164	12376	15322	14586	27796	1954	88156	12664	20540	47302	44488
1044.75062 Da 988.27 s	16.47	523.383			3390	7366	0	6558	0	864	2722	29972	262	11052	0	2324	9466	21722	0	0	0	1626	0	15422	0	3266	11894	9114
1359.05218 Da 988.28 s	16.47	680.533			2950	7664	0	8342	194	884	1708	47886	182	10124	0	2712	10748	28930	0	0	0	1342	0	16460	0	3576	10952	8548
750.52085 Da 988.31 s	16.47	751.528			4786	4802	0	5974	1316	1522	2750	12360	950	8880	0	3574	7380	12114	406	774	508	2372	0	20366	390	2246	10262	7328
96.09309 Da 988.34 s	16.47	97.1004			3616	6454	196	6454	838	2444	2400	13182	690	8270	0	3258	6974	18574	340	564	252	1742	0	8694	482	4258	8268	7976
698.49816 Da 988.40 s	16.47	350.256			4836	12048	162	12582	1374	3588	5976	25036	1068	10504	0	4120	9444	11468	378	734	372	0	0	15870	564	5822	9418	8220
398.24989 Da 988.40 s	16.47	399.257			1690	2158	502	2658	950	1050	1596	4324	1016	1996	0	1222	2668	2372	0	706	0	1380	0	0	802	1428	2792	1894
112.12421 Da 988.41 s	16.47	113.131			1404	2778	0	2212	0	756	1148	6488	308	3770	0	1496	2572	7522	0	0	0	844	0	3338	0	1710	2974	3552
614.17766 Da 988.41 s	16.47	615.185			1926	1206	348	1516	1332	834	1086	2150	934	2480	0	1086	2050	2498	628	870	764	1210	0	2598	718	798	2176	2074
488.23177 Da 988.45 s	16.47	489.239			5136	3690	846	4228	3824	2582	3086	6738	2650	6516	490	2598	5598	6952	1564	2660	1820	3046	300	11356	1912	2320	8028	5806
108.09285 Da 988.68 s	16.48	109.1			7252	14510	322	12216	1872	4140	6038	32648	1292	18478	422	7594	16872	42190	864	824	806	4632	194	21372	784	8060	18882	16710
1012.79729 Da 988.78 s	16.48	507.406			0	4372	0	5220	140	552	1068	16876	0	4626	0	1720	4804	10648	0	0	0	1070	0	8750	0	1598	4592	4152
124.12405 Da 988.89 s	16.48	125.131			2836	4616	286	4086	596	1224	2092	12800	522	5382	0	2526	5226	12202	214	280	0	1002	0	5514	388	2792	6080	4564
138.13969 Da 988.96 s	16.48	139.147			2016	3020	0	2928	432	1184	1834	6516	260	4068	0	2274	3734	7780	0	0	0	800	0	4002	0	1412	3952	3628
136.12404 Da 988.99 s	16.48	137.131			4330	8406	214	7314	974	2694	4100	21008	740	11266	0	4622	8718	21564	388	604	374	2820	0	9554	480	4870	9832	9654
110.10850 Da 989.10 s	16.48	111.116			2030	3536	0	3170	548	1262	1548	8524	304	4768	0	2366	4272	8772	262	0	0	1136	0	4832	174	2654	4512	4248
94.07742 Da 989.13 s	16.49	95.0847			8194	14572	428	12836	2092	3958	5956	34516	1680	20294	0	9246	19904	45946	678	1350	766	4284	0	21456	1078	8672	20894	17820
740.49219 Da 989.14 s	16.49	741.499			1894	2224	0	2870	882	578	1112	4244	422	3220	0	1646	3036	4834	242	420	0	1078	0	3786	360	1414	3120	3140
410.21588 Da 989.34 s	16.49	411.223			12308	6418	2774	8014	8830	6290	5858	5764	7082	11794	1506	7594	10328	8262	5692	5284	5286	7408	1142	8692	4822	5594	11834	10692
122.10840 Da 989.38 s	16.49	123.116			6352	11498	338	10738	1286	3624	4828	24922	1050	16148	0	6212	13352	30772	500	876	616	2824	250	15396	502	6212	13692	12290
82.07768 Da 989.40 s	16.49	83.085			1930	3670	0	3240	658	1328	1706	9014	534	5330	0	2472	4096	10434	180	228	222	1038	0	5350	206	1616	4558	5466
347.30181 Da 989.43 s	16.49	348.309			3976	6282	378	5250	1382	1890	3052	13412	1188	7438	0	2516	6538	15058	486	684	446	2404	0	10526	668	3456	7584	6910
586.42975 Da 990.38 s	16.51	587.437			3810	3502	630	5234	1482	1106	2512	1910	1182	6852	848	3032	6030	2886	1072	704	970	1276	436	4372	934	3228	5512	5766
281.27015 Da 992.03 s	16.53	282.277			5364	3360	1698	2652	2562	1328	4800	4492	1886	5984	660	2084	6336	8452	1510	1954	1758	3830	894	3446	2114	2622	3294	5024
298.18647 Da 992.10 s	16.54	299.194			0	0	1292	0	1168	632	936	0	1272	0	752	9898	0	424	1570	1818	1734	1648	1280	0	1152	6648	0	0
326.21944 Da 1008.74 s	16.81	327.227			3472	1134	476	7856	0	2450	1166	7566	1524	2526	2874	90394	0	10226	0	1984	1138	2312	2452	1126	770	59054	0	1008
708.54919 Da 1010.51 s	16.84	709.556			1130	5384	0	6082	0	0	538	46822	0	5346	0	5946	4566	79858	0	0	0	464	0	24962	0	4832	21908	4668
446.26007 Da 1012.81 s	16.88	447.267			1224	2734	0	3066	240	860	856	6858	286	3890	0	1502	2302	13110	0	414	0	998	370	7976	304	1138	3024	3134
436.23106 Da 1013.26 s	16.89	437.238			1108	1834	448	2112	604	508	626	3780	402	2700	0	1966	1606	6214	586	488	482	700	0	4440	0	1410	1854	2022
380.28838 Da 1013.41 s	16.89	381.296			20302	13722	74004	28096	249518	74026	34518	46500	32766	22302	55076	0	14124	0	27102	86338	40148	22178	27522	13924	225258	15794	22998	38778
407.29946 Da 1021.42 s	17.02	408.307			5762	4916	1012	2428	1304	530	10834	152084	770	21416	474	4492	21000	258494	924	0	0	1872	392	88646	1162	7022	19590	20152
696.54955 Da 1025.37 s	17.09	697.557			712	2674	0	2950	0	0	334	21804	0	2418	0	658	3034	34988	0	0	0	0	0	11244	0	512	9138	1954
658.51061 Da 1050.53 s	17.51	659.518			2864	1962	0	1986	770	656	1304	5614	478	3376	0	1404	2560	10230	0	0	0	980	0	5590	274	778	4880	2716
710.56520 Da 1050.83 s	17.51	711.572			3136	7672	0	6722	1104	0	1598	27324	376	7042	0	3416	7420	40594	220	0	0	1028	0	23230	0	3064	11190	5948
436.17739 Da 1052.40 s	17.54	437.185			7212	3722	5934	3424	6722	3294	4224	3026	5160	6526	5032	4076	3636	6206	7708	6520	8086	6952	5838	4796	4470	2674	4370	6262
416.11965 Da 1052.65 s	17.54	417.127			2200	1080	1926	1588	1736	1072	918	762	2204	2022	2090	1468	1760	1814	2710	1704	2446	1428	1730	1188	1802	1124	1702	1986
358.16106 Da 1052.71 s	17.55	359.168			3570	1790	3076	2304	3310	1970	2042	1456	2596	2656	2262	2404	2286	2902	3312	2698	3462	2806	2404	2172	2566	1750	2432	3052
368.18954 Da 1052.79 s	17.55	369.197			5506	3168	4778	3308	4706	3064	3864	2782	4450	5222	3094	4038	3594	6156	5294	4728	5676	6104	4124	4338	3870	2524	4878	6088
294.18184 Da 1052.83 s	17.55	295.189			2140	2852	1906	2806	1664	1634	2956	4010	1784	2930	994	2102	2876	3562	1958	1944	2184	3184	1288	2784	2780	1838	2168	2532
578.42396 Da 1053.23 s	17.55	579.431			2118	1034	1392	1382	1858	754	1260	1240	1278	2536	836	2028	1168	4010	1828	1762	1908	2568	986	1682	1434	1358	1720	2370
426.14855 Da 1053.48 s	17.56	427.156			5860	2736	6342	3464	6426	3326	3278	2210	5354	4144	5602	4150	3404	5058	6730	5300	7972	4678	5416	3894	4978	2412	3960	4886
612.41940 Da 1055.10 s	17.59	613.427			1682	1202	0	1392	1734	1240	1438	2424	1312	1616	1180	0	1390	0	0	1730	0	1628	1382	1306	1836	0	1462	1866
667.60962 Da 1065.58 s	17.76	668.617			2492	2854	0	496	328	0	2756	9250	0	10234	0	984	5888	31282	0	0	256	782	0	3754	0	1188	1914	5764
309.30147 Da 1066.39 s	17.77	310.309			8474	12808	1300	1082	1636	868	10988	28132	892	29122	824	4438	17530	114604	712	872	900	3848	476	13320	1272	4682	8922	19438
96.09313 Da 1069.73 s	17.83	97.1004			2466	2482	0	2414	890	1338	1984	5902	686	3850	0	3816	3868	9204	0	336	398	1062	0	3888	376	2490	3426	3476
448.27587 Da 1069.91 s	17.83	449.283			21278	30616	1548	22236	15574	10588	12412	13846	12412	23548	1062	7886	26712	26698	7718	6512	8286	12524	682	24932	5862	15894	23682	19190
806.58371 Da 1070.39 s	17.84	807.591			1626	2008	0	1918	744	592	740	2188	482	2654	0	586	3238	4702	222	0	0	660	0	3496	0	488	2696	2188
754.56048 Da 1070.69 s	17.84	378.288			3916	4118	0	5292	866	0	3622	11368	944	6366	0	1990	6132	9164	292	0	200	2244	0	7144	348	2572	5606	4600
516.26319 Da 1070.74 s	17.85	517.27			2376	3910	232	1842	1650	1226	1654	1892	1456	2750	0	820	3070	2994	866	1020	944	1788	0	2888	878	1674	2636	2080
136.12410 Da 1070.76 s	17.85	137.131			1918	2246	0	2288	592	956	1642	6254	552	4132	0	2580	2738	5840	288	294	286	1024	0	3388	464	2522	2972	2508
738.59613 Da 1070.90 s	17.85	739.603			169124	150146	910	168966	49556	51510	81334	714606	38752	259984	384	217034	280402	1142534	14972	11560	14972	58108	0	627450	13192	162288	358358	184228
1112.87185 Da 1071.20 s	17.85	557.443			3440	5022	0	5450	0	1270	2458	22252	0	6032	0	2582	6610	15902	0	0	0	1084	0	9568	0	2936	6536	4794
438.24736 Da 1071.21 s	17.85	439.255			9354	6686	1242	7978	8000	5244	6108	7778	7026	9654	820	7468	9312	11898	5566	4048	5508	6190	630	7466	4650	5844	9852	10014
1471.17756 Da 1071.24 s	17.85	736.596			2432	3212	0	2640	446	854	0	20160	332	4026	0	1112	5336	14558	0	0	0	520	0	6608	0	1384	4786	3546
375.33305 Da 1071.56 s	17.86	376.34			5476	5992	0	5476	1782	2528	4700	20910	1518	9178	0	4738	8164	22302	698	604	720	3300	0	13308	672	0	8794	7642
884.35816 Da 1072.09 s	17.87	885.365			638	766	172	3738	270	432	706	4118	0	1954	0	7402	498	12204	0	510	0	1802	0	12136	0	8216	546	2406
412.25706 Da 1105.81 s	18.43	413.264			15062	8894	15682	10532	13992	9222	9672	10826	13074	15706	12112	11798	11712	14826	16126	15364	17892	14814	11296	10968	13502	21558	12402	14786
290.25715 Da 1107.03 s	18.45	291.264			2066	1192	1922	1188	1984	1544	1656	1382	1948	1894	1622	1362	1700	1244	1924	1862	2342	1536	2000	1678	1684	1216	1726	2150
333.29920 Da 1156.36 s	19.27	334.306	_2E,4E,12Z_-N-_2-methylpropyl_octadeca-2,4,12-trienamide	C22H39NO	1862	1784	0	468	0	0	1938	7066	0	3068	0	370	3230	17806	0	0	0	686	0	2872	506	380	1812	2656
228.20746 Da 1157.22 s	19.29	229.215			1432	806	1060	876	1348	966	1726	2050	1280	1594	988	784	1092	2334	1562	1198	1520	1556	1198	3006	1238	624	1812	2076
454.17962 Da 1157.85 s	19.3	455.187			3430	1842	2550	1650	2924	1608	1774	2186	3126	3342	2284	1508	2240	2884	3376	2716	2928	1766	2184	2142	1832	1112	2362	2362
464.20852 Da 1159.28 s	19.32	465.216			2396	1096	1608	1130	2228	1018	1486	1312	1924	2392	1424	1092	1712	2422	2404	2166	2402	2222	1924	2058	1560	826	2476	2142
396.22101 Da 1159.29 s	19.32	397.228			4094	2066	3170	2862	3800	2152	2786	0	3234	4476	1856	2572	3384	4794	4320	3662	4028	3360	2484	3990	2260	1864	4674	4370
386.19200 Da 1159.43 s	19.32	387.199			3340	1666	2634	2208	2992	1432	1612	2704	2330	2876	2158	1502	2328	2936	2754	2144	3414	2232	1962	2434	2208	1098	3096	2792
322.21497 Da 1160.35 s	19.34	323.222			1804	1460	1630	2664	1292	1160	2502	4606	1458	2132	918	1348	0	3240	1408	1360	1336	2028	1258	3052	1746	1316	2612	2592
444.15076 Da 1161.29 s	19.35	445.158			1656	902	1894	1266	1698	1166	1066	1138	1824	1672	1690	1088	1240	1942	1786	1414	1900	1320	1230	1390	1438	732	1514	1576
717.62264 Da 1166.03 s	19.43	718.63			1170	2952	0	1656	592	270	754	14552	150	2818	0	994	2662	16968	172	260	0	448	0	7858	0	558	5996	2280
427.30178 Da 1173.69 s	19.56	428.309			2292	0	936	704	594	486	1884	5178	444	4410	0	746	1850	10756	698	588	454	794	350	3712	376	812	3418	3148
745.65390 Da 1178.03 s	19.63	746.661			2318	3132	0	1644	270	0	944	19770	0	4144	0	950	3930	31920	0	0	0	660	0	9906	0	700	7478	3280
318.25173 Da 1225.54 s	20.43	319.259			3766	1810	3098	2554	3904	2450	2690	3380	3158	3834	3132	4578	2848	3878	3714	3480	3582	2832	3144	3472	2606	2790	3280	3320
334.28300 Da 1308.21 s	21.8	335.29			2480	0	1714	1904	1722	972	1430	5396	1316	2920	1234	1518	1968	8510	1694	1560	1706	1820	1480	6964	1496	984	4066	2338
436.35106 Da 1331.67 s	22.19	437.358			2188	2764	350	3056	388	596	1030	12470	566	3110	218	2078	2920	23862	414	0	530	802	0	11570	316	1294	5952	3120
536.38534 Da 1417.40 s	23.62	537.393			1800	1280	2002	1630	1284	0	1052	2492	1692	1866	1004	466	1956	1980	2026	1606	1774	1500	1090	0	1600	916	1970	1594
705.52889 Da 1549.75 s	25.83	706.536	PC 30:0	C38H76NO8P	762	8316	0	19172	502	434	684	54874	178	4544	0	10708	11782	79178	608	496	538	1236	0	20384	508	4736	3666	2932
731.54417 Da 1604.29 s	26.74	732.551	PC 32:1	C40H78NO8P	0	8012	0	22126	0	460	0	35280	0	2682	0	24936	2600	39362	138	2732	0	2844	0	0	186	17190	3196	0
230.02555 Da 128.58 s	2.14	231.033			2722	1406	2662	1236	3084	2272	3432	2724	2554	3100	1564	2232	1198	2856	3062	2948	2698	2750	1896	3118	2338	1160	3558	3002
167.98892 Da 129.18 s	2.15	168.996			3094	1352	2974	1258	4062	2800	4228	3528	3584	3110	2286	2470	1482	3230	3204	4012	3274	3716	3056	3868	3090	1598	3396	4448
185.99939 Da 129.45 s	2.16	187.007			1800	0	1532	0	1590	1562	2342	1434	1530	2096	1316	1166	0	1722	1728	2138	1828	1390	1548	1382	1326	152	1576	1822
230.02543 Da 151.42 s	2.52	231.033			2656	1082	2360	1098	2080	1740	2662	1964	2760	3164	1702	2388	1184	2790	3124	2950	3246	2818	2250	3448	2680	1172	2994	2670
133.96543 Da 186.18 s	3.1	134.973			5574	3626	4076	3984	4960	2852	4796	4554	3984	5658	3032	4284	4146	5562	5346	4890	5896	6316	4498	4866	3416	4036	4630	4684
115.95490 Da 186.79 s	3.11	116.962			2036	1588	1314	1488	1572	972	1790	1766	1632	2600	1462	1828	2072	1848	1928	2128	1846	2316	2504	1752	1528	1410	1688	1970
239.15062 Da 525.89 s	8.76	240.158	Salbutamol	C13H21NO3	11108	4320	6034	980	4628	192	2546	11640	2006	3928	2404	3040	5774	25916	2666	4590	1182	688	2242	2388	1966	992	1612	208
1088.60324 Da 542.56 s	9.04	363.875			0	346	0	46012	0	1022	0	9908	0	5360	0	50142	0	16046	0	26342	0	90298	0	0	0	180270	0	0
1088.60463 Da 542.91 s	9.05	545.31			0	0	0	20660	0	358	0	3934	0	1856	0	31324	0	8796	0	10428	0	39150	0	0	0	107802	0	0
194.11380 Da 548.10 s	9.14	217.103			39126	18290	33534	36816	34088	20262	38196	31008	37234	40316	25500	47790	41338	38826	45366	33710	36012	57602	33538	34650	31578	33914	44192	30624
257.16112 Da 547.31 s	9.12	258.168			2940	3068	4176	5988	6278	1672	2774	3504	2306	2836	2158	6858	4038	3682	4490	4242	2656	2962	5728	4154	3582	3936	4256	2204
205.12996 Da 553.99 s	9.23	206.137	Panthenol	C9H19NO4	8040	2488	2756	1598	3190	13098	2652	2734	1536	4056	2128	5548	2430	5140	1306	5460	2840	6516	3274	2060	1478	8462	5508	3508
180.06339 Da 554.37 s	9.24	181.071	Theobromine	C7H8N4O2	13674	9936	68314	110146	62898	15514	65606	31692	20934	43678	145206	129764	84664	57410	17164	8120	141612	148606	32534	28158	92440	68300	8944	0
180.06324 Da 559.84 s	9.33	181.071	Theobromine	C7H8N4O2	24852	12062	0	128518	0	21722	0	0	41946	135556	205958	0	0	0	0	0	216508	207580	51310	0	167238	0	16400	16430
184.11986 Da 560.10 s	9.33	185.127			2670	2028	1912	3686	4978	2640	3604	2932	3064	3182	3158	8906	2716	4100	2908	3812	2474	3640	1672	2470	924	2102	1422	1888
206.10182 Da 559.56 s	9.33	207.109			2020	1448	2150	3378	3890	2606	2448	2392	3142	3780	3394	0	2196	3334	3346	3314	2528	3810	1530	2312	862	3800	1410	1748
114.06696 Da 564.59 s	9.41	115.074			2118	1324	2572	1352	2036	1110	3418	1164	3016	2392	2346	1128	2992	986	2414	1602	1868	652	4826	1892	3320	13250	3190	1392
278.16483 Da 567.39 s	9.46	279.172			19390	8008	10132	8804	9578	5686	7200	5532	10174	9222	8602	6400	6640	9412	8474	5646	11600	722	9870	12876	11222	7036	9754	11128
145.05389 Da 568.83 s	9.48	146.061			5942	4626	3606	5624	3496	4096	2602	2156	3438	3290	3768	11074	2436	3322	2316	2448	3246	4150	3708	5018	3510	8582	3164	5266
156.07526 Da 569.71 s	9.5	157.083			10020	8166	12104	9778	28046	9860	8580	12198	10716	10614	51294	86282	10450	8166	11630	14892	13868	13526	126512	139556	12494	10902	23128	9524
188.10333 Da 572.76 s	9.55	211.093	AZELATE	C9H16O4	0	0	714	640	6474	25222	19678	25074	29200	23648	25732	37336	23722	29984	33490	22158	37244	13400	29720	23528	36904	24864	44390	38236
152.08237 Da 572.36 s	9.54	153.09			458	384	0	444	1334	4688	4202	4824	4312	4322	2198	4680	4564	4730	5150	4696	5300	2176	4972	4432	6126	4034	7518	5998
242.11153 Da 573.42 s	9.56	243.119			212	202	324	0	1714	4680	4106	3328	6424	4256	9880	4022	4838	4534	7734	3890	7810	2044	6940	5264	7738	3876	7590	6888
238.14010 Da 575.95 s	9.6	261.129			31104	23420	34628	37694	31844	25620	26988	30008	38740	34840	51892	84596	33124	31196	55748	36080	26868	70612	60666	52728	41116	35320	30034	28754
178.05951 Da 575.96 s	9.6	179.067			1620	1408	1620	954	1764	2150	2702	1558	2294	1800	2596	0	2488	1558	3012	1626	2436	0	2796	2448	2850	1388	3570	2386
294.14211 Da 575.97 s	9.6	295.149			50840	22116	38890	35952	33434	25652	17536	24998	34436	34906	31002	35284	31936	34016	36482	24868	36008	1516	30440	44746	46970	31830	52874	54148
161.03219 Da 576.16 s	9.6	162.039			19470	9918	15378	17038	12900	13080	7148	10406	11800	13384	14154	13018	12818	13660	15146	9732	14898	976	13154	17578	20360	13306	20848	21972
132.07741 Da 576.16 s	9.6	133.085			1554	1392	1708	1212	1410	908	1718	1300	1776	1784	1852	2986	1712	1460	2416	1388	1570	3428	2330	2332	1240	1492	1476	1238
206.14036 Da 582.02 s	9.7	207.148	Norlidocaine	C12H18N2O	337630	13466	128094	37618	99236	19370	147840	18064	921672	71046	293018	42464	96502	22118	142334	9314	246354	11254	55940	28508	106660	19506	56564	9240
226.16684 Da 581.31 s	9.69	249.156			13062	11812	11926	14488	13798	9872	16946	15826	11854	6332	4322	15770	15526	13288	15808	15910	13160	17504	2266	13454	12692	17824	18440	16684
246.13517 Da 580.22 s	9.67	247.142	lenticin	C14H18N2O2	584	1176	596	1072	8054	9988	1994	6830	730	952	2308	30222	5834	19014	8708	10970	1206	6662	656	1374	1644	10748	2292	4466
234.17161 Da 579.53 s	9.66	235.179	LID_235.1805_10.1	C14H22N2O	0	10106878	200326	0	10106878	10106878	242626	137188	118298	0	10106878	246548	620532	297962	217700	195336	107836	357224	0	234190	10106878	173638	10106878	174446
156.07541 Da 584.87 s	9.75	157.083	Indole-3-acetonitrile	C10H8N2	0	6900	16590	0	10220	0	9274	10426	4696	0	0	12168	2350	10138	7908	23508	14948	12836	1266	11136	0	11920	22146	11844
180.06343 Da 585.10 s	9.75	181.071	Theophylline	C7H8N4O2	52740	26438	8480	24980	79524	41506	27122	124378	58446	36938	59532	197376	36556	37282	1254	4214	21358	63858	3822	5874	20978	64860	14614	14032
266.19790 Da 590.05 s	9.83	267.205			2546	1230	1514	1692	2186	1784	1786	884	1994	2826	1976	972	1856	1670	2188	1510	1890	0	2062	2302	2108	1452	2302	1898
452.37053 Da 591.13 s	9.85	491.333			644416	394992	450334	514190	467756	413942	442746	235604	588620	765068	523018	158986	505936	444070	551566	258558	464316	24486	577842	525262	561978	288482	532690	456062
256.15346 Da 590.88 s	9.85	257.161			548956	381356	449424	499684	437554	419434	411130	281626	510750	621580	501432	245704	455098	446942	496710	286720	478320	69500	507264	468940	515936	312550	511758	423728
468.34449 Da 591.50 s	9.86	235.18			10106878	10106878	10044722	10106878	10018514	10106878	10071204	10106878	10106878	10106878	10100796	8921960	10085316	10043816	10074598	0	10106878	0	10106878	10106878	10106878	10092026	10093808	10106878
274.16398 Da 592.36 s	9.87	275.171			2338	1854	1756	2106	2024	2116	2196	1338	2264	2414	1992	1264	1802	2220	2396	1294	1968	388	1902	1940	1840	1476	1826	1792
282.16619 Da 594.87 s	9.91	305.155	Hexaethylene glycol	C12H26O7	6502	5310	6556	6730	5842	6534	5882	10602	8280	7396	20102	45376	5246	5754	16590	8946	5740	69042	27850	11580	9480	9796	5508	6204
296.12150 Da 606.79 s	10.11	297.129			304	0	264	0	0	1288	1068	2314	2666	1786	5538	0	0	0	2750	0	2156	1362	2690	2132	2814	92052	2632	784
326.19229 Da 609.80 s	10.16	349.182	Hydroquinidine	C20H26N2O2	9230	7516	11022	9544	9260	7458	6970	8986	9282	9320	52136	77708	9154	9792	51216	10818	9474	52658	76322	26376	14514	10422	8980	9452
240.18148 Da 610.24 s	10.17	241.189			5388	4066	5538	5188	5574	4144	4756	4714	4314	6154	4080	6274	5438	5316	5474	6008	4910	5750	4156	4968	3370	4868	4520	5514
248.18721 Da 610.33 s	10.17	249.194			5708	4102	950	5674	1236	1704	1118	1144	2548	2276	1494	1446	1390	1408	1480	844	1278	1026	1856	2098	2488	1660	1644	1298
226.08008 Da 612.35 s	10.21	227.087			13312	8352	19662	12266	15704	1234	1258	3448	2032	1596	3198	2468	1342	1492	1720	1976	1710	1676	2274	1640	1646	1548	1758	1724
196.11956 Da 616.00 s	10.27	197.127	NCGC00381364-01_3-propan-2-yl-2,3,6,7,8,8a-hexahydropyrrolo_1,2-a_pyrazine-1,4-dione	C10H16N2O2	28210	11974	27944	30836	26268	8172	26318	18390	30116	15250	59228	38034	31846	17492	18456	10936	24472	10920	7840	7814	32406	19468	10528	5700
274.13772 Da 619.32 s	10.32	275.145			1886	1272	1738	1526	1960	1322	1266	1464	1818	1624	1836	1978	1558	2030	2300	1436	2134	1704	1792	1818	1694	1232	1864	1726
210.08534 Da 622.05 s	10.37	211.093	_NCGC00160335-01_4,7,7-Trimethyl-2,3-dioxo-bicyclo_2.2.1_heptane-1-carboxylic acid_	C11H14O4	0	1244	1496	1920	4000	10788	7686	14386	12536	10472	10104	22832	13330	15870	16260	11984	19350	7776	15354	15308	18900	14162	21944	18702
370.21853 Da 622.25 s	10.37	393.208			16572	9380	15006	10514	15256	9190	10538	12578	16314	17528	115276	129280	13580	17088	114712	15148	17346	75384	136176	43896	26620	14542	15898	13392
194.07891 Da 625.16 s	10.42	195.086	caffeine	C8H10N4O2	764342	175482	42218	274910	629282	943066	147098	557980	1355690	851890	2267878	910010	266536	181646	3630	6580	224570	135286	72284	44862	680188	736872	116242	50424
296.04198 Da 625.20 s	10.42	279.039			3728	1168	412	1388	3584	4238	922	3344	6236	5072	8608	4760	1864	1284	0	0	1710	888	596	476	4138	1798	662	382
310.18731 Da 626.36 s	10.44	311.195			2278	1358	2094	2844	5254	8388	8812	19726	11270	7124	15790	6842	7514	7884	13390	5990	15518	970	17256	5790	14072	7156	14212	17438
292.17594 Da 627.87 s	10.46	293.183			3658	774	2868	1260	2440	1652	3476	0	3936	3684	4142	252	2930	0	2884	0	2272	0	5344	3440	4968	4112	3272	0
182.09097 Da 630.40 s	10.51	183.098	HARMAN	C12H10N2	4096	2656	4616	3564	10498	19242	12334	25260	20214	14540	21584	31040	17300	24228	22626	18344	22440	12820	20810	17402	24048	20700	25274	26386
414.24462 Da 632.86 s	10.55	437.234			20412	10080	18004	15590	16918	11866	11002	14664	15416	17182	124348	157882	18384	23402	145390	20552	16716	80440	173548	58410	34296	17768	19946	16118
190.05870 Da 634.79 s	10.58	191.066			4634	3454	5108	3982	5460	3964	4058	4556	5950	3720	4778	6174	6078	5054	5636	6148	6632	5172	3654	5308	4184	3412	4638	5170
209.10244 Da 635.15 s	10.59	210.11			4698	5194	6524	6450	4732	4932	4370	5864	6436	4644	3128	3736	9316	5500	5948	4088	6336	4054	3144	6428	6064	7724	5938	5710
195.08798 Da 635.73 s	10.6	218.077			5890	3144	7626	6646	7130	2552	4146	6082	5728	5796	8052	8692	5880	8156	5916	5370	4924	4464	5204	5504	6460	3938	6368	4668
192.07503 Da 635.71 s	10.6	193.082			14508	9172	17772	11678	16258	9242	13840	14324	15262	10912	14576	14632	16326	13752	17832	16616	17586	11488	12706	15776	13870	7916	19086	14622
225.13297 Da 637.71 s	10.63	226.14	Cyprodinil	C14H15N3	5116	7572	8800	8522	5188	5742	5362	8462	7244	5158	5186	3744	10286	5294	4746	5826	5956	5040	2544	6160	7714	10610	6876	5756
179.05693 Da 639.83 s	10.66	180.064			182	0	0	0	254	182	0	236	0	194	14476	29660	18204	16364	24596	8836	0	90532	13078	17406	14746	20994	18330	19838
208.06985 Da 638.67 s	10.64	209.077			48732	35552	64452	47878	30426	2654	2940	3286	4650	3680	6088	13886	3076	3582	3450	4268	4334	11146	3854	4136	3810	8938	3934	3050
458.27075 Da 641.84 s	10.7	481.26			10074	7028	10680	7448	9162	5046	6232	7206	8320	8950	71928	64264	8102	11430	83186	10084	8840	38976	93732	30628	16998	11060	9272	7264
168.07707 Da 640.79 s	10.68	169.084			20666	17582	21484	20548	11864	0	2374	2518	2232	0	1958	1948	2516	1882	0	1882	2542	0	1970	2328	2100	1886	2418	0
170.09099 Da 642.33 s	10.71	171.098			22618	11174	23376	8652	25900	21148	22942	11110	29030	31536	22316	11756	19078	12122	25456	23588	30154	21398	31374	41374	13514	8926	37894	24704
360.21246 Da 643.38 s	10.72	361.22			0	0	0	0	1646	1170	4146	3226	4874	4614	44008	0	992	0	1104	0	1940	0	2158	910	1370	760	1608	1748
303.20294 Da 646.25 s	10.77	304.21			1672	3334	1682	4450	1800	1606	1294	3996	1912	2422	2452	7044	1754	5054	3380	1834	2848	3376	2566	5702	1998	8860	1804	3000
358.19577 Da 646.91 s	10.78	359.203			0	0	0	0	744	1386	1276	2210	1782	1306	5302	1374	1304	1356	1802	0	2156	566	2688	2066	2308	0	2770	1914
164.08173 Da 647.81 s	10.8	165.089			3912	2702	3210	2110	3456	3380	4028	3798	4116	0	3480	3368	4242	3338	3858	3894	3844	2964	3572	4138	3522	2524	3978	4190
196.10653 Da 647.92 s	10.8	197.114	NCGC00385365-01_C11H16O3_2_4H_-Benzofuranone, 5,6,7,7a-tetrahydro-6-hydroxy-4,4,7a-trimethyl-, _6S,7aR_-	C11H16O3	9736	6388	13944	10158	13922	10406	11926	15148	14004	10700	16362	17898	16258	15292	12866	15018	14648	14410	15368	11526	18448	13802	18730	13224
398.18966 Da 648.40 s	10.81	399.197			0	286	0	0	0	938	1274	3072	2082	0	6630	0	1100	0	0	1808	1874	1472	1906	1408	1592	2168	1900	1496
502.29700 Da 649.69 s	10.83	525.286			7928	3936	6236	8022	5748	3188	4254	5564	5746	5270	49256	45846	5540	7634	45906	6306	6936	24120	54348	19850	11918	0	6160	5012
214.11674 Da 651.97 s	10.87	215.124			31574	23318	34076	25308	35676	23222	27222	31882	30314	26214	27054	35278	28160	34494	34292	33860	39120	34942	28512	30132	29430	25582	32362	36508
400.20525 Da 650.62 s	10.84	401.213			0	0	0	0	2296	2250	2626	9678	5786	5226	61668	3190	0	2372	1352	2224	2236	1992	3462	1040	2000	2994	2930	2620
480.39036 Da 654.29 s	10.9	241.202			103730	71658	72644	169074	119394	109722	80092	83774	71650	126818	55658	151836	85824	99394	169070	87648	107688	57934	69122	95882	71934	120656	78752	81956
546.32309 Da 656.71 s	10.95	569.312			5818	3450	5028	5214	4750	3194	3606	4826	5102	5182	32676	28908	3934	5704	43320	5144	4556	16268	39502	16204	9258	0	4698	5050
146.07276 Da 658.35 s	10.97	147.08	Methyl trans-styryl ketone	C10H10O	660	0	728	0	1364	2300	1192	4298	2376	2272	2262	1272	1134	1112	1542	1342	1694	1268	3582	1472	2342	2216	2642	3312
590.34903 Da 663.03 s	11.05	613.338			3686	1834	3476	3894	2844	1976	2026	2666	2900	3320	16302	15398	2910	3750	23446	2884	3204	7210	21266	7770	3866	0	2982	3002
272.08197 Da 661.08 s	11.02	255.079			802	710	728	856	1006	3162	0	6924	1070	6954	1172	41976	820	22596	1174	27090	0	39900	762	832	886	54312	774	1312
278.11157 Da 661.45 s	11.02	279.119			2626	1758	3274	2350	3184	1926	2872	2968	3232	2558	3294	2790	3540	3618	3384	2730	3402	2522	2574	3458	3120	2250	3562	3144
452.33456 Da 661.06 s	11.02	453.342			2704	3052	3188	2504	1946	1750	2676	3332	3164	3288	1392	1532	4810	2214	0	2584	2674	2314	1212	2492	3296	2116	3130	0
232.11531 Da 662.18 s	11.04	233.123			20412	6908	19008	18094	9236	3796	6218	9214	19042	5328	27492	17072	19148	11492	6078	4922	4202	1312	3334	0	9236	2122	3012	1756
474.31622 Da 661.36 s	11.02	475.323			2382	3272	3252	2310	0	2222	3796	4590	0	2518	1278	1378	3548	3090	3256	3486	3588	2578	1146	3198	3402	1492	3700	3144
209.10445 Da 660.67 s	11.01	210.112			3866	1542	3246	3868	1954	1396	2854	2914	2014	2940	1926	3702	2424	2862	2634	2614	3528	2804	3308	3398	2288	3536	3880	3128
225.13316 Da 663.55 s	11.06	226.14	Cyprodinil	C14H15N3	5940	4760	7438	5782	4848	2936	4576	5594	6382	5054	5040	13844	5502	7728	4576	5064	6088	9224	4372	3700	4690	9376	5934	6470
139.06249 Da 662.08 s	11.03	140.07			3140	978	3014	2076	2522	2144	3014	1478	2560	2814	2186	608	2952	1856	3376	1926	3142	1430	3320	2894	2366	1594	3002	1836
300.19235 Da 661.96 s	11.03	301.2			0	0	0	0	636	784	1528	2668	1896	1420	3114	1086	1208	1206	1604	1086	1632	1302	2142	1760	2508	1610	2830	2308
280.12706 Da 661.98 s	11.03	281.134			0	0	0	0	2318	3512	2652	5702	4538	3582	5508	6212	3646	5690	5136	4738	5970	2624	4530	4770	5006	4348	5394	5232
210.13516 Da 662.52 s	11.04	211.142	Cyclo_proline-leucine_	C11H18N2O2	38462	12972	22388	24920	13394	5692	15292	16656	30268	9932	33438	21352	35164	18068	12120	8054	7352	2944	4612	4018	15318	4632	6368	3140
340.18490 Da 663.74 s	11.06	341.192	NCGC00347635-02_5-acetyloxy-3-_hydroxymethyl_-2-oxo-6-propan-2-ylcyclohex-3-en-1-yl_ 3-methylpentanoate	C18H28O6	0	0	0	0	2240	4456	3470	8438	6530	4234	13330	5226	4624	5922	7448	4542	8050	3712	8348	6176	8242	5304	9948	7098
254.11151 Da 665.41 s	11.09	255.119			2146	0	0	0	2004	3366	2548	4274	4286	2860	0	3986	3502	5148	3878	0	4762	2530	4140	3490	0	3126	4496	3888
216.09744 Da 667.07 s	11.12	239.088	4-Formyl-antipyrine	C12H12N2O2	14426	9888	12412	9092	12852	8094	11632	12526	12422	8750	11954	11528	12030	11428	11128	11884	13942	10892	11932	11284	10382	6848	14514	10270
258.14295 Da 668.93 s	11.15	259.15			5370	4174	5430	4198	6662	4434	4636	6008	5296	5576	5004	4560	6814	6494	5690	5708	6396	5288	4830	5596	5924	4026	6438	6912
306.10596 Da 668.57 s	11.14	307.113			10066	12104	8734	18308	9914	11464	7290	11602	7706	10982	6064	38044	7732	17126	8546	14318	13200	24116	7222	9212	7028	16348	8766	19854
285.19232 Da 667.22 s	11.12	286.2			8184	15028	2628	17592	3316	11662	476	3304	2662	4252	2830	32640	1306	8514	2910	8536	7162	40512	5388	7496	2494	33984	2908	9634
256.12759 Da 670.17 s	11.17	257.135			1388	1318	1668	1408	2060	3420	2702	2256	4298	2270	8566	1764	3458	2764	4290	1452	3626	2022	3892	4584	4248	2176	4094	3582
222.08546 Da 673.58 s	11.23	223.093			7484	4422	6694	6944	8158	5282	5436	6910	7430	6958	7712	10972	7374	6930	8344	7266	9024	6448	7160	6284	7860	6014	9168	7238
270.07042 Da 674.80 s	11.25	271.078			1676	1746	1642	1436	1714	902	1352	1222	1934	1684	1518	3144	1728	1820	1774	1748	2390	2642	1166	1896	1138	3252	1712	2456
279.14522 Da 674.10 s	11.24	280.152			2246	1810	2388	1620	2050	1238	1394	2084	1830	1940	1970	1574	1958	2062	1548	1754	2398	1108	1428	1928	2160	2396	1844	1848
254.10674 Da 674.75 s	11.25	255.114			0	0	0	9328	0	0	0	0	577818	0	10834	0	0	24824	0	0	0	2256	0	0	4370	0	0	0
380.17905 Da 675.04 s	11.25	381.186			0	270	330	0	1276	1590	1512	4202	2852	0	8576	3566	1774	0	2858	2408	2624	0	3212	2282	2338	0	2574	2488
231.08564 Da 675.25 s	11.25	232.093			3868	668	1392	5632	2436	1594	1358	1074	51182	2268	3070	2406	2392	3872	1528	1460	1474	2286	2080	1766	4302	1628	1832	1358
370.19494 Da 678.66 s	11.31	371.202			0	0	0	0	1576	2072	2030	3324	4346	3574	31472	2348	1176	1692	2186	1684	2564	1514	3172	2148	2946	3014	2984	2282
226.15562 Da 680.20 s	11.34	227.163	NCGC00381386-01_2-_7-hydroxy-6-methyloctyl_-2H-furan-5-one	C13H22O3	0	0	0	0	582	3318	2492	5174	3532	2782	1404	3898	4452	3770	4678	2858	4582	1912	3656	3786	4888	3818	4726	4154
208.14486 Da 680.38 s	11.34	209.152	NCGC00380942-01_C13H20O2_1H-Indene-3-carboxylic acid, 3a,4,5,6,7,7a-hexahydro-3a,7,7-trimethyl-	C13H20O2	0	0	0	0	2412	9148	6758	12450	11940	8522	3980	12400	10920	10122	10590	8808	12332	5384	9396	10552	13426	10400	12662	10534
266.14780 Da 681.99 s	11.37	267.155	Verrucarol	C15H22O4	0	0	0	0	14776	33432	20946	57958	60072	39628	24818	77388	50146	62412	49114	44598	62504	28288	44618	46770	56664	57336	61764	53284
250.11652 Da 680.99 s	11.35	251.124	Dipropylphthalate	C14H18O4	6204	3396	5102	3700	6764	10666	8396	10044	11432	8762	10156	13174	12510	12670	12504	10648	14046	5298	12002	11392	15180	7798	18272	14320
322.10101 Da 680.34 s	11.34	323.108			2792	6770	2528	9894	2990	3756	1726	7652	2658	3132	1642	24706	2366	4448	2964	4094	3356	6854	2766	2858	2786	5800	3838	6182
168.11166 Da 681.18 s	11.35	169.119	Geranic acid	C10H16O2	74658	37654	85670	53008	75336	49736	62780	33608	74980	67222	59146	54472	67842	37992	71320	71896	77882	98852	64314	58840	61940	45950	73854	69140
240.09592 Da 681.59 s	11.36	241.103			8908	6602	12628	8864	13680	5772	8188	10382	10354	10062	9682	12350	11872	10278	10070	10824	10492	13018	8744	7956	10220	8650	12778	8690
218.05230 Da 683.01 s	11.38	219.06	4-Methylumbelliferyl acetate	C12H10O4	5108	2662	4630	4296	4666	3318	4432	4340	5818	5266	5138	6246	5418	5098	6144	4500	5980	4686	4454	5212	4528	2070	6856	4056
196.07009 Da 683.58 s	11.39	197.077			12212	9622	12256	13620	13282	12950	12170	15180	16320	13512	15082	16534	13992	12246	13346	14194	15734	16300	15436	15932	13370	9180	14306	12778
298.10122 Da 685.36 s	11.42	299.108			17398	10728	15390	11716	15718	11256	13458	13890	16238	15158	11648	13224	17844	14476	14294	13916	18338	15024	11890	15028	13112	17048	15858	14966
144.04138 Da 686.83 s	11.45	145.049			2450	2346	2038	1872	2350	1750	2606	1938	2316	2178	1312	1590	2580	1782	2252	2452	2594	2354	1636	2824	2148	1496	2558	2602
212.10146 Da 686.03 s	11.43	213.109			8484	5630	8682	6758	7416	5950	7426	6198	8906	9030	5978	10722	6644	9592	8686	8540	10526	9604	6330	8258	6294	5914	9222	7748
218.09006 Da 685.49 s	11.42	219.097			2838	0	2222	2076	3864	3516	2926	5202	3974	3140	4064	3544	4270	4156	3442	2772	6162	2172	2498	2882	2898	2702	4104	2240
202.05708 Da 686.83 s	11.45	203.064			5080	3362	4782	5248	5324	3572	3046	3154	4990	4500	4996	6418	4072	5506	5124	4254	5732	4022	4256	4204	4598	2114	4690	4740
202.04499 Da 686.15 s	11.44	203.052			2280	2394	2408	2288	2064	2666	2462	2184	2602	2144	1746	5088	2482	2444	2828	2040	2850	3726	2352	2278	2438	1808	2436	3148
436.26530 Da 687.97 s	11.47	459.254			0	0	0	0	29400	40892	43870	38562	76512	29388	153866	4104	30932	16218	63718	8778	78010	0	85482	63896	98674	2212	109122	98348
225.09699 Da 688.32 s	11.47	226.105			13720	48538	7682	71670	12174	33926	4232	36084	7856	22686	7614	166592	11080	60672	11806	54442	27548	136312	3936	13468	5136	104432	9604	78264
162.05214 Da 686.39 s	11.44	163.059			1684	1618	1200	1314	1352	1342	2054	1304	1334	1564	790	1166	1718	1164	1300	1636	1942	1546	1122	1354	1040	894	1924	1590
180.07524 Da 688.90 s	11.48	181.083			6720	4492	6172	7628	7794	6516	6724	8874	7704	7306	7340	10116	7726	9286	8394	6860	8456	7712	7336	8274	8710	5670	8392	7968
113.08309 Da 687.98 s	11.47	114.09			1486	3598	532	4558	832	2640	0	2426	828	1642	478	8752	1116	4260	0	4046	1696	11628	378	0	660	5970	0	4004
256.11842 Da 688.17 s	11.47	257.126			6352	0	662	11534	0	890	0	0	189910	5930	12792	716	0	21200	0	2956	0	3580	0	0	0	1544	0	0
342.20185 Da 687.95 s	11.47	343.209	NCGC00169827-03_2E,4E_-12-hydroxy-13-_hydroxymethyl_-3,5,7-trimethyltetradeca-2,4-dienedioic acid _IIN-based on: CCMSLIB00000847643_	C18H30O6	0	0	0	0	1498	1904	4078	4354	6752	4710	46192	1222	1778	1392	0	1204	2744	1436	2692	1368	2402	1214	2406	1866
127.09876 Da 690.39 s	11.51	150.088			7984	4334	9514	7588	9158	4244	6898	6760	8152	7312	6900	5340	9216	6812	6872	8060	7602	9006	7056	5526	7628	5316	8546	8446
182.09119 Da 690.75 s	11.51	183.098			4636	3316	3318	4616	6886	8548	6744	14908	10152	8938	14522	13400	9334	12094	9760	10902	13298	8002	11112	8308	11206	9444	11462	12096
240.13338 Da 690.60 s	11.51	241.141			1602	4782	2262	0	0	5692	3626	2528	0	3378	2802	2650	0	2884	2712	0	3192	0	5930	3882	0	0	0	6944
354.19992 Da 691.86 s	11.53	355.207	19S-Methoxytubotaiwine	C21H26N2O3	0	0	238	0	5178	7930	6754	22638	13358	9900	37830	12350	7614	10762	12974	8540	13700	7140	19806	11210	17354	12654	19968	16492
412.15923 Da 691.54 s	11.53	413.167			0	0	0	0	800	1170	1032	2952	2398	1764	4526	10480	1160	1828	1880	1260	2136	826	2880	1722	2524	0	3508	1942
218.14210 Da 696.22 s	11.6	219.148			176488	8110	46878	22730	52208	9688	24986	27252	520274	58500	140892	34034	43592	26110	46516	8996	86156	14228	9120	9804	20022	14672	22460	4298
284.12209 Da 696.24 s	11.6	285.129			10290	4748	6940	6420	9504	11516	10190	14916	16228	11810	21048	7766	11450	11790	18752	9874	19246	8628	15228	13212	12184	5674	14408	12072
250.07968 Da 695.68 s	11.59	251.087	Citrinin	C13H14O5	5590	3408	5764	4692	4164	2602	2764	2792	3210	2636	2120	2352	2602	2868	3104	2228	4054	3046	2882	2446	2110	1600	2826	2840
278.07517 Da 694.95 s	11.58	279.082	Sulfamethazine	C12H14N4O2S	774	918	0	1400	608	878	2802	15716	998	1286	0	7782	1820	8838	6770	26368	2266	16278	1532	4044	1034	10964	758	920
236.10103 Da 696.19 s	11.6	237.108			10282	7048	10586	8430	10922	7944	9382	9860	8458	10572	9384	9104	10326	8828	10884	9638	11290	10150	8744	10050	9114	5104	10612	11218
141.11454 Da 698.66 s	11.64	142.121			5730	3414	5736	4208	5260	3798	4248	4462	4670	4948	4246	3360	6104	4748	5264	4822	4442	5830	5110	4902	4362	3158	5638	4556
208.10670 Da 696.51 s	11.61	209.114			5238	3120	5208	3686	5376	4802	4962	4798	5942	5128	5402	5186	4910	4878	7020	5708	6968	5120	5140	5194	5132	3698	5860	6344
300.15307 Da 698.78 s	11.65	301.16			5650	2742	5486	3842	6406	5302	6164	8376	8378	6172	8442	11310	7338	7856	8920	4882	12416	6476	9190	9448	11292	7872	11124	11302
260.07740 Da 698.33 s	11.64	261.085			0	0	0	0	1444	3166	2274	1546	4724	2276	8370	2262	5526	2482	8056	2210	7796	810	7418	5882	8192	1340	8666	4524
244.12790 Da 696.81 s	11.61	245.135	Etomidate	C14H16N2O2	3144	1316	1514	1986	2426	3988	5482	5058	6112	4466	5402	1396	3344	2848	4942	2866	5402	3020	6184	3998	4192	1268	4602	3676
308.12183 Da 697.86 s	11.63	309.129			2166	1498	2378	1730	2410	1950	2180	2056	2184	2124	1926	2014	1980	3246	2694	2304	2634	2168	2786	2150	2464	0	2526	2460
268.12688 Da 699.05 s	11.65	269.134			3542	2524	3338	2972	4212	3600	3810	8550	9506	4026	4466	6228	4782	5108	5530	0	6500	4378	4610	5132	5330	4996	6676	5534
239.14929 Da 699.53 s	11.66	240.157			11536	11344	17128	12224	8558	9510	13180	14100	14286	10344	7450	9970	13054	13380	12338	11122	13680	8912	6688	12778	15310	10470	13844	12836
232.10592 Da 699.85 s	11.66	233.113			5234	2908	4410	4028	4922	3412	3214	3300	3516	4236	3188	3962	4418	5078	4598	4674	4676	3186	4326	4280	4072	2478	5678	4980
286.13741 Da 700.39 s	11.67	287.145			21246	12548	19458	12480	22748	12602	18592	19198	20512	19798	15656	17786	21278	21004	21260	17360	22466	22548	14892	19394	19504	9342	21328	20836
188.04223 Da 701.14 s	11.69	189.05	3-Hydroxy-2-naphthoic acid	C11H8O3	1992	1232	1464	1820	1988	2292	1646	1244	1766	1732	1478	1310	1582	1526	1890	1390	1836	1332	1624	1790	2002	0	1880	1736
370.19482 Da 702.33 s	11.71	371.202			0	0	0	0	1432	1922	3082	4048	5150	4246	28332	2218	1854	2070	2826	1872	3164	1610	3200	2566	2646	2088	3132	2904
185.10380 Da 702.96 s	11.72	208.093			866568	341800	944710	513248	805130	608594	720688	440736	904724	805476	661700	253030	761016	462796	1059638	706482	1062162	363248	715806	877572	664274	229900	943138	694154
157.07278 Da 702.97 s	11.72	140.069			47970	16140	46822	23406	42746	26434	47596	21912	45232	43622	28956	10412	37788	18048	52630	37066	49140	19782	39886	46020	37712	18968	43632	34132
269.05605 Da 702.54 s	11.71	270.063			4928	1508	4300	2178	4022	2640	6516	3292	5072	3728	1730	1130	5050	2058	4668	5038	5366	2802	2534	5470	3990	834	4998	3816
90.04618 Da 704.89 s	11.75	91.0535			3060	4586	0	7088	4408	6924	2638	1444	3648	6370	2708	2118	3840	3288	3208	1544	2922	1872	4338	3954	1884	1826	4650	4052
237.13501 Da 702.89 s	11.71	238.142			2814	3274	4588	2828	2822	2442	2804	3172	4196	2420	2132	2138	5058	1986	2346	2684	2336	1736	2108	3090	3500	0	2870	2896
95.07264 Da 702.94 s	11.72	96.0799			17950	6748	19554	9196	17310	11828	17558	8094	17508	16504	13948	4532	14782	8704	22402	15924	20530	7828	15540	20814	14378	7562	19784	14378
194.09037 Da 702.37 s	11.71	195.098	Caffeine,Anhydrous	C8H10N4O2	9658	8934	11280	10060	11816	11346	8868	11142	13004	11414	11246	14196	11280	13820	12268	9238	11388	11296	11754	11498	12558	7558	12658	12950
214.05862 Da 702.99 s	11.72	215.066			2034	982	1318	1338	1404	1286	1802	1696	1838	2234	0	1998	1828	1504	1750	2144	1888	1846	1592	1874	1174	866	1524	1826
152.04572 Da 704.85 s	11.75	153.053	Methylparaben	C8H8O3	552238	846352	8890	1163746	745418	1084214	331010	268988	470970	1099116	380462	229462	632044	623684	424314	209018	389712	261402	685456	715334	437974	293876	726242	687066
250.17629 Da 705.03 s	11.75	273.166			112514	74210	98332	78622	112808	81342	90948	93706	99758	112448	85246	82922	117736	114692	122620	94674	124690	91416	86706	108836	88348	39612	117516	116880
254.00831 Da 703.47 s	11.72	237.005			21732	19548	972	17118	21572	18942	20292	18068	21450	19722	11010	9168	23660	17140	19280	15426	20692	14726	15134	24218	20552	8968	20340	22918
158.05447 Da 704.83 s	11.75	159.062			2786	2826	0	3854	3622	3746	1700	1224	2214	3960	1414	1474	2798	2634	2156	928	1800	1574	2828	2960	1844	1072	3162	2904
228.13250 Da 705.22 s	11.75	229.14			25912	12132	25254	13394	27828	14140	20750	13180	22616	28678	19212	10792	27862	14992	24938	21100	24654	19496	22920	24770	23400	7944	25584	23988
282.14288 Da 704.40 s	11.74	283.15	NCGC00179742-02_C15H22O5_3,12-Epoxy-12H-pyrano_4,3-j_-1,2-benzodioxepin-10_3H_-one, octahydro-3,6,9-trimethyl-, _5aS,6R,8aS,9R,12S,12aR_-	C15H22O5	2414	1460	2380	1786	3686	3512	3684	5828	5762	4322	9400	3640	4852	5674	7370	4174	6270	2700	6626	6532	6272	2584	7682	5314
276.09489 Da 706.27 s	11.77	277.102	3-_2-hydroxy-4-methoxy-6-methylphenoxy_-5-methylbenzene-1,2-diol	C15H16O5	3284	1748	3154	2822	3422	1840	2462	1908	3076	3244	2224	4058	2598	2710	3566	2630	3680	3022	1754	2184	2454	1836	2934	3318
108.05643 Da 704.72 s	11.75	109.064			34608	57358	1094	70342	43548	67032	21488	20374	30618	72364	26172	15890	39190	34952	26270	13604	25566	17176	45198	42812	29814	20254	43756	44232
362.22856 Da 707.36 s	11.79	385.218			842	0	0	476	38510	79722	59698	386064	96428	119136	175832	147538	41512	134052	84668	126780	112138	124056	122466	76470	110902	170690	140018	120038
378.19227 Da 706.57 s	11.78	401.18			0	342	476	0	2022	4714	3018	20006	0	7192	0	5112	3896	5770	4318	7384	5170	6648	4796	4478	6844	4028	6838	6674
304.09031 Da 707.60 s	11.79	305.098			3934	2568	4058	4540	4062	2056	2678	2918	3048	3798	2486	3916	3504	4726	4004	3976	4216	4544	2986	3292	3550	1928	3626	3650
331.23402 Da 706.87 s	11.78	332.241			680	2488	784	7604	704	1334	584	3038	776	1752	1718	7000	1336	6076	1692	1454	2092	2968	2326	5862	1654	8246	1210	1850
210.12225 Da 707.95 s	11.8	211.13	Jasmonic acid	C12H18O3	12730	4804	46212	37392	66374	14118	3660	4258	70224	54972	17204	12032	7092	13922	9562	13320	49104	19468	14906	14266	13454	6478	27778	21178
166.09686 Da 709.36 s	11.82	167.104	4-tert-Butylcatechol	C10H14O2	27240	9192	17022	12146	14508	29704	25894	8726	26776	21882	11034	10810	12870	12414	27994	20928	55178	17214	10902	21212	10802	6592	20712	31930
140.08246 Da 707.31 s	11.79	141.09			1982	1020	0	1534	1424	0	1728	1910	1620	1984	1792	1400	1694	2164	2002	1744	2112	2388	1830	1574	1772	0	2504	2092
322.13754 Da 708.71 s	11.81	323.145	13,15-dihydroxy-9-methoxy-5-methyl-4-oxabicyclo_10.4.0_hexadeca-1_12_,13,15-triene-3,11-dione	C17H22O6	2142	2106	2060	2268	2174	2390	2424	3090	3110	2434	3272	2180	2478	2764	3088	2152	3156	1856	3086	3044	2902	0	3108	2674
264.13236 Da 709.75 s	11.83	265.14	_9E_-11a-hydroxy-3,6,10-trimethyl-6,7,8,11-tetrahydro-4H-cyclodeca_b_furan-2,5-dione	C15H20O4	3094	2230	3414	2862	6612	16256	7690	19242	16638	16372	12790	22560	15690	20204	20810	17844	20058	4586	13292	14924	16662	12012	23110	19858
382.23268 Da 710.16 s	11.84	383.24			0	0	0	0	2380	4108	7488	4832	7922	4626	8622	0	8364	3734	8294	2442	10156	0	8476	9762	9466	0	12468	11612
436.26525 Da 711.40 s	11.86	459.254			0	0	0	0	32994	51526	60728	84958	102358	50288	153626	10888	51640	46650	88488	31444	109864	5144	101590	84896	126602	8700	154632	131946
516.20580 Da 711.20 s	11.85	517.213			0	0	0	0	3150	3716	4834	6244	10390	4770	9356	1048	5554	4826	9040	3150	9548	502	7918	7996	10808	450	14692	10994
222.12236 Da 713.30 s	11.89	223.13			16344	9190	15968	11074	14112	10522	13688	11598	15346	13560	10448	9310	13834	13748	19586	14844	21480	15386	8696	16450	10740	4396	18910	15640
178.09720 Da 710.59 s	11.84	179.104			5916	3534	6050	4094	6104	3366	4984	4816	4910	5640	3982	3786	6778	4220	6534	5424	5330	6060	4270	5834	5462	3682	6914	5386
453.29153 Da 712.07 s	11.87	454.299			0	0	0	0	1820	2648	4552	5430	5134	3412	4722	0	4176	2526	4590	2156	5292	384	4518	5382	5600	370	8028	7592
342.16335 Da 710.61 s	11.84	343.171			1724	1160	1482	1906	0	1444	1394	0	1572	0	2564	2972	0	1828	1834	1522	1908	2404	1294	0	0	1748	0	1810
364.18425 Da 711.44 s	11.86	365.192			0	0	0	0	0	6646	7386	3512	18378	11580	0	7946	5204	8940	6270	5524	9142	3170	0	4428	0	3756	6046	4994
394.14979 Da 712.52 s	11.88	395.157			0	496	0	0	1054	1204	0	1826	1534	1154	1760	562	2136	1784	1288	1896	1852	774	1210	1740	1676	642	1948	1650
252.09595 Da 713.28 s	11.89	253.103			4402	3242	4360	2738	4174	2542	4116	3968	3838	3812	3580	2696	3896	3766	4432	3512	3912	3840	2592	4496	3534	0	4380	4162
332.12113 Da 715.00 s	11.92	333.128			0	0	0	0	1170	2540	1662	4114	2342	2332	2670	0	1362	3210	1764	0	3018	1606	1446	1728	1898	0	2078	2284
312.08054 Da 713.33 s	11.89	313.088			12708	8446	10328	8406	10578	7984	9722	9824	11832	13514	9218	8008	12926	13498	14082	10598	11946	12998	7100	12348	8574	3500	12218	14466
336.18949 Da 713.88 s	11.9	337.197	MMV676474	C21H24N2O2	0	0	0	0	4080	12300	0	29436	15448	11698	32496	21526	10770	20948	17872	15378	17694	5730	14364	15250	16276	0	21484	18680
288.09501 Da 714.45 s	11.91	289.102	2,3-Dihydroxy-4-Methoxy-4_-Ethoxybenzophenone	C16H16O5	2646	1514	2856	2214	2762	1946	2070	2060	3128	3188	2684	2756	3008	2932	2934	3092	3836	2888	2194	2290	3748	1346	3840	2794
362.16876 Da 714.96 s	11.92	363.176	5-hydroxy-7-_2-_2-hydroxy-5-oxo-2H-furan-3-yl_ethyl_-7,8-dimethyl-5,6,6a,8,9,10-hexahydro-1H-benzo_d_2_benzofuran-3-one	C20H26O6	0	298	0	720	0	1800	1496	2102	3342	2656	6156	4336	2464	4000	3876	2224	3742	0	2590	2606	2858	1016	2492	0
232.06869 Da 716.44 s	11.94	233.076			56474	34806	57104	43306	60938	31186	43830	53910	54458	52540	48908	37114	54742	61110	64012	52862	64298	51092	35596	48430	51000	15790	58960	54698
254.04917 Da 718.59 s	11.98	255.056	Daidzein	C15H10O4	12282	5088	12070	7764	11790	8634	6498	9656	14188	11496	13332	7714	9540	13272	16088	11716	16064	8544	9826	12702	12990	3020	12604	10944
210.08546 Da 718.61 s	11.98	211.093	_NCGC00160335-01_4,7,7-Trimethyl-2,3-dioxo-bicyclo_2.2.1_heptane-1-carboxylic acid_	C11H14O4	43470	19570	31656	31962	39020	36232	41428	60734	55228	53056	49036	33158	42286	51734	56618	52842	47976	53674	39642	55496	49234	17386	53340	47348
184.10634 Da 717.54 s	11.96	185.114			213316	61664	182456	55782	190478	120100	155726	96892	176234	205454	107906	29800	153564	60514	243894	177880	209928	236844	192820	161972	127304	19066	237310	218008
226.05297 Da 719.02 s	11.98	227.06			3410	1932	2282	1600	2300	1646	3712	4906	2880	3434	1914	1816	3684	2748	3662	3876	3494	3830	2046	3766	3878	614	3134	3262
435.28103 Da 718.05 s	11.97	436.288			0	0	0	0	844	1772	2476	2242	2608	1522	2534	254	4026	1216	3944	566	4074	0	2342	4274	3020	0	4110	5014
148.05104 Da 716.07 s	11.93	149.058	cis-Cinnamic acid	C9H8O2	5278	3992	4458	3182	5954	3116	5880	4692	4292	5330	2800	3230	5886	4382	5002	5190	5384	5000	3994	5266	4416	1950	5276	5154
306.14278 Da 718.53 s	11.98	307.15			0	1856	2710	2226	2776	4276	3134	4118	6582	4922	5456	11790	8916	10048	9478	6100	9104	3756	3086	5924	4392	3436	5674	5122
324.15308 Da 717.57 s	11.96	325.16			3220	3192	3654	4052	0	0	3650	5196	4584	4894	4592	3122	3872	4752	4756	4992	5244	4140	3294	5146	4174	0	5030	4244
336.15340 Da 717.72 s	11.96	337.161			1426	1130	0	1370	1562	1278	1192	2018	1822	1614	1702	0	0	1938	1782	1398	1666	1412	0	1660	0	0	1692	1830
350.16892 Da 718.68 s	11.98	351.176			0	0	0	0	0	2046	1760	3276	3178	0	3872	2040	2604	3352	4026	2218	3268	0	0	2756	2796	0	3462	3246
196.10646 Da 720.24 s	12	197.114	NCGC00385365-01_C11H16O3_2_4H_-Benzofuranone, 5,6,7,7a-tetrahydro-6-hydroxy-4,4,7a-trimethyl-, _6S,7aR_-	C11H16O3	4836	3926	5084	4888	7114	9976	7216	11136	11720	8750	9700	5218	8790	9554	13220	10120	11876	6590	13870	11160	14092	2922	16554	16402
194.09056 Da 721.70 s	12.03	195.098	Methiuron	C10H14N2S	23498	19214	21864	19894	24856	19234	18596	23196	24082	25938	20514	24092	27862	25472	22818	21642	28112	22332	17424	25420	21062	8736	24758	25666
226.11685 Da 721.99 s	12.03	227.124			51164	33886	44374	39322	55764	35106	37820	48898	49122	55476	39804	49954	56466	60844	55088	50156	64548	49830	41278	55128	46342	22854	59130	58238
170.13937 Da 722.94 s	12.05	171.148			232458	160876	288052	213968	277082	121486	232350	202798	220110	253502	174912	130602	280026	230350	254276	246770	178286	256722	198448	252250	316280	133180	281378	208808
313.22381 Da 723.68 s	12.06	314.231			2926	17300	2576	58270	2876	7712	1236	13866	3724	11608	2946	74016	3456	22460	4310	11470	10716	65406	6254	25816	2786	54096	2114	7784
216.07268 Da 721.73 s	12.03	217.08			16544	9820	15120	9530	16424	7828	9392	10064	13206	15272	10948	8446	14234	14536	16068	12950	15892	11118	9522	14584	12010	2572	13926	14728
208.10642 Da 721.74 s	12.03	209.114			9972	6572	7552	6312	8544	5390	8712	7768	8844	10950	6822	7656	8622	10060	9028	7324	10696	7226	6368	8664	7628	3012	9918	8974
314.20736 Da 723.48 s	12.06	315.215			228	0	0	0	1914	2716	2412	10446	2926	3520	6300	2024	2414	2724	3628	3270	3952	0	5922	4048	5048	1986	6126	5704
290.11131 Da 724.15 s	12.07	291.119	dehydrocurvularin	C16H18O5	0	1820	2810	3232	3352	2690	2028	2394	2508	3132	2190	2708	2466	3702	3350	3068	2964	3938	2544	2690	2534	1630	2780	3646
328.18430 Da 726.59 s	12.11	329.192			17856	11442	15258	10330	16446	12700	14872	13714	14224	14310	14318	5676	17038	14246	16232	13602	18122	12464	9958	14338	15688	3192	16190	15818
418.25474 Da 727.81 s	12.13	441.244			0	0	1220	0	52538	100326	80494	91222	158484	73912	206124	8264	111314	51674	166280	30930	176612	1754	142236	149090	201500	3450	249790	240802
498.19535 Da 727.47 s	12.12	499.203			1240	0	1416	716	2760	3526	3438	2150	6102	3710	6750	298	5416	2608	7662	1594	8272	0	5748	6300	8100	0	9358	9834
420.26865 Da 728.01 s	12.13	443.258			0	0	0	0	11740	18672	18028	25640	28592	19570	27820	1098	18762	10914	45008	10782	45944	0	65650	39562	74738	1632	83522	70096
215.15244 Da 729.06 s	12.15	238.143			10444	5056	16832	4886	3452	2980	17892	9826	0	10222	4880	6780	10298	16526	4962	3780	7490	6390	9238	13256	4752	4980	6588	10934
216.11178 Da 727.89 s	12.13	217.119			4062	2178	3804	2282	4118	1830	2832	2866	2216	3658	2082	1376	2780	3026	2828	3248	4014	2360	1710	3002	2794	1072	3448	2406
228.13229 Da 727.56 s	12.13	229.14	9-methoxycarbonyldec-9-enoic acid	C12H20O4	152806	53124	101208	68210	92816	59672	49894	71600	85048	85116	62048	33308	73470	71838	90840	82018	83248	36274	29940	85270	74090	18184	107676	94526
176.11872 Da 727.81 s	12.13	177.126			0	2602	3306	2796	3386	0	0	3522	2490	2794	2240	1654	0	2896	3680	4208	2956	3768	2862	3306	3478	1508	0	3368
324.19048 Da 727.52 s	12.13	325.198			0	0	0	1446	2004	2526	4062	3918	6330	3672	0	1998	3298	2530	4022	2456	4018	2096	3694	3854	3512	1574	4158	3470
252.09591 Da 727.93 s	12.13	253.103	Methyl 3,4,5-trimethoxycinnamate	C13H16O5	4694	2818	4154	2848	4520	3738	4126	4036	3864	0	3964	2368	0	4394	4226	3714	0	4014	1692	3276	2986	1156	4330	5186
402.16098 Da 728.61 s	12.14	403.168			0	0	690	0	1284	1772	2306	1372	4038	3302	27254	960	1144	1832	1762	1292	1964	0	1718	1322	1472	454	1716	1576
286.07975 Da 728.95 s	12.15	287.087			0	0	0	0	1146	1096	1188	1964	2264	1864	2104	694	1952	1228	2434	1388	2592	0	1174	2338	1956	374	2398	2434
336.18967 Da 729.24 s	12.15	337.197	Tabersonine	C21H24N2O2	0	0	0	0	5406	13162	7332	0	13978	11636	32816	17026	11420	23518	18760	17056	18776	0	12730	15128	16300	5900	22146	19666
384.21065 Da 731.53 s	12.19	385.218			0	0	0	0	59684	132968	99136	407754	150382	170906	201692	130434	66750	191660	136048	156744	151374	133244	137154	123078	166684	132520	207866	173354
344.21791 Da 732.24 s	12.2	345.225			0	0	0	0	10430	25942	23394	96020	27260	34512	32264	17572	14108	23642	24390	29818	26622	30304	26806	21966	30016	23700	37898	34972
580.06774 Da 731.30 s	12.19	581.075			0	0	0	0	1204	1410	634	1656	2000	1838	2876	1352	990	2990	1934	1642	2742	1096	1776	1536	1748	722	1988	1558
522.10937 Da 731.48 s	12.19	523.117			0	0	0	0	2690	3062	1756	4572	4108	2540	5356	2232	1824	5814	4396	3402	4760	2118	3304	2610	3810	1152	4332	3902
442.16911 Da 729.88 s	12.16	443.176			0	0	0	0	6046	8214	6316	18466	11602	12710	12676	3556	5558	13194	12008	10032	12802	7804	8582	7734	9570	2706	14390	12146
400.16409 Da 730.27 s	12.17	401.171			0	0	0	0	3228	5012	5296	0	10998	8962	81008	2166	0	5388	5328	0	4194	0	4540	0	3846	0	0	0
464.15100 Da 731.42 s	12.19	465.158			0	0	0	0	4820	6822	4566	10706	9184	9372	12000	3962	4186	10956	7488	7798	9352	5876	7634	6440	9504	3084	9682	8124
436.22124 Da 730.00 s	12.17	437.229			0	0	0	0	1674	1602	3342	3142	3676	3000	4684	0	2800	0	5070	1518	4158	0	5914	4762	6742	0	7082	4252
176.08086 Da 730.61 s	12.18	177.088			5654	3842	5982	4116	6282	4692	4928	4758	5480	5706	3982	2642	5356	6928	6644	4886	6606	4074	3470	5434	4648	1504	6714	6544
251.14956 Da 730.69 s	12.18	252.157			11552	11560	15148	12268	10844	8474	9970	11778	11728	8998	7696	4088	20080	8942	10816	6742	13378	6636	5034	8862	11538	7360	13688	10094
211.15637 Da 730.78 s	12.18	212.164			6580	7362	7824	7006	5672	6178	0	10928	8546	8454	3894	2536	13912	5882	8162	6008	8498	5170	4754	6858	8198	8218	9192	8368
204.07408 Da 730.91 s	12.18	205.081			2188	2004	2456	1582	4208	4568	3090	3404	5676	4592	5258	3722	5108	6710	8628	4472	7850	3020	3738	4892	5534	1408	5254	5202
122.07195 Da 730.06 s	12.17	123.079			2582	2436	3092	2050	2964	2956	3638	3550	3510	4220	3338	2042	4086	2776	3828	3526	3402	4448	2640	2632	2976	2058	4198	3502
236.10090 Da 730.17 s	12.17	237.108			22566	13188	18142	14714	20288	15908	16702	17784	20228	19098	15252	7962	19668	21412	24192	14914	22464	15600	9440	15898	16178	4322	19984	19360
274.11651 Da 731.22 s	12.19	275.124			2396	1756	2496	1758	2442	1722	1928	1934	2220	2204	1552	1152	2642	1996	3208	2270	3330	2236	1312	2184	1898	0	2194	2200
352.18440 Da 731.26 s	12.19	353.192			1010	650	1490	0	3480	4802	4468	10776	9228	6390	39248	4190	4286	6074	6284	4572	6492	2862	6498	5422	6918	2916	7820	6568
474.17990 Da 731.31 s	12.19	475.187			0	0	0	0	876	1032	770	2312	1544	1658	2508	592	900	1784	1202	1198	1880	978	1382	1400	1580	0	1654	1806
199.15595 Da 731.63 s	12.19	222.145			6630	3390	7908	1582	1502	704	6994	3990	1534	5076	2952	2350	5002	9262	1172	1152	3864	3364	0	4798	2286	1656	1940	4652
304.16364 Da 733.49 s	12.22	305.171			0	0	0	0	0	10304	4012	2414	11568	10360	7746	28148	20566	32494	19836	17640	18954	1386	2746	15196	5768	5978	7514	11310
239.11367 Da 731.86 s	12.2	240.121			22388	49706	15124	54020	17332	56880	12602	30096	17366	24092	11436	90506	17322	37204	22576	51940	41554	166428	7016	19332	11682	34964	19734	117132
253.16474 Da 731.61 s	12.19	254.172			19526	10566	22064	5532	4494	2558	23524	11020	4240	14220	7140	8074	15026	24170	3330	3914	11062	8148	9148	13660	9188	3534	7494	16910
164.11902 Da 731.87 s	12.2	165.126			3192	1738	2710	1542	1736	1412	4424	2318	1666	2574	1766	1150	2078	2744	1592	1814	2160	1982	1848	3184	2304	1350	1962	3060
204.11277 Da 732.69 s	12.21	205.12			8424	2946	8334	3172	4548	1810	1778	2206	1830	1860	1742	0	1988	1778	2410	1868	2122	1506	1748	2568	1756	0	2124	2310
358.15177 Da 733.53 s	12.23	359.159			0	0	0	0	776	1316	1480	3854	2078	1936	4364	1304	1908	2362	2806	1728	2950	906	2782	2692	2518	0	3842	2582
330.10569 Da 734.15 s	12.24	331.113			0	0	510	422	940	1446	996	1812	1618	1490	1886	1208	1240	1840	1636	1380	1610	998	1286	1646	1392	714	1678	1888
283.95233 Da 735.08 s	12.25	284.96	tris_2-chloroethyl_phosphate	C6H12Cl3O4P	4974	2996	4050	3390	5438	2894	5592	3744	4142	5416	2508	1426	4520	3864	4840	4052	5086	3948	2904	4290	3832	1274	5200	5096
304.12689 Da 734.76 s	12.25	305.134			0	1256	1672	0	0	1202	1618	1862	2068	1932	2404	1594	2046	2160	2420	2134	2396	1586	1422	2164	2092	0	2206	2074
305.93415 Da 735.56 s	12.26	306.941			9826	5020	8738	5238	8796	5446	5836	6336	6678	7346	5692	3180	7254	7214	7698	6490	10808	6084	4440	7108	6524	1340	8900	7910
213.17147 Da 733.86 s	12.23	214.179			3988	3188	4180	3534	1836	2480	5824	4374	2810	4610	1296	1800	5278	3548	2900	2060	3318	2372	1778	3480	3382	3150	3338	3392
267.17964 Da 734.03 s	12.23	268.187			10508	9344	12804	11676	7764	6726	7628	10024	8664	9324	4028	3578	18354	7452	8454	7590	9520	4678	2730	9810	8492	3028	8132	7696
221.10176 Da 736.31 s	12.27	222.109	Metaxalone	C12H15NO3	95482	15384	67258	21682	57952	46600	74624	16468	75170	81486	34540	6278	52824	19492	100664	68416	95958	36956	31590	81762	43062	6428	70930	64506
298.10089 Da 737.52 s	12.29	299.108			46192	30072	47218	32576	44138	31226	39944	42760	39706	41026	31344	24128	41446	41026	49714	41270	56964	42862	24586	43656	39134	9408	47372	47608
310.17423 Da 738.85 s	12.31	311.182			2234	1558	2410	2130	3078	4712	4048	8126	7406	4914	6400	6804	6288	8436	7690	5854	8024	4070	5744	9404	10020	2716	10292	9606
366.16361 Da 737.79 s	12.3	367.171			1896	844	1758	914	1780	1102	0	1660	1600	1562	1378	0	1514	1342	2194	2260	2076	1328	952	1802	1776	0	2144	1982
322.19733 Da 738.63 s	12.31	323.205			4758	3442	3918	4130	3498	3340	4884	4168	4180	5000	2816	2290	4800	4324	4730	4244	5190	4412	3306	4938	3834	1852	4662	4380
426.22097 Da 738.00 s	12.3	427.228			1418	0	0	0	0	1176	1556	2012	2198	2882	11706	1160	1390	0	1868	1472	2190	1544	2008	1872	1956	780	2558	0
168.11251 Da 739.31 s	12.32	169.12	Geranic acid	C10H16O2	6498	5522	7612	4676	6684	8148	9088	5534	9772	9950	7002	3774	8754	6140	12888	9232	11782	6756	7340	12454	7394	2590	9544	12748
344.17769 Da 738.86 s	12.31	345.185	Formoterol	C19H24N2O4	23516	11874	22920	13782	20556	15948	19850	17622	21274	22916	15656	7594	19620	20832	24812	20904	25496	18354	13552	22622	18064	3474	22284	24700
330.20012 Da 740.37 s	12.34	331.207			111104	61762	109124	58092	103570	70012	93676	93824	100906	104014	87346	43886	112260	94580	115552	92518	120616	88314	76670	107872	100594	20200	115918	104962
240.02060 Da 740.18 s	12.34	241.028			15794	11316	18288	12416	14810	10842	14778	17622	16238	13174	10446	7442	19732	13954	17676	12606	16252	11420	9148	14572	20474	5740	16062	14362
308.21804 Da 740.41 s	12.34	309.225			27052	20556	22672	18658	23462	15422	26864	23092	24550	29062	15592	14020	27598	22270	25660	23844	27030	25334	19784	25200	20908	10544	24946	25336
174.12428 Da 740.53 s	12.34	175.132			3110	1936	1950	1734	2352	1652	2600	2342	2364	2744	1326	1480	2966	2416	2320	2734	2630	2700	2184	2634	2050	1210	2058	3130
218.03875 Da 740.19 s	12.34	219.046	Diphenylsulfone	C12H10O2S	21378	13418	19626	14640	18374	13042	20304	18464	20316	20400	10430	8762	25460	21850	22640	18156	22114	17212	12316	20216	23002	9188	20148	23490
248.10107 Da 740.54 s	12.34	249.108			4964	3102	5528	4474	5394	4882	4826	5644	5416	5760	5322	4140	7472	5528	5912	5224	6448	5516	4780	5674	5172	2658	7552	5798
320.15884 Da 740.81 s	12.35	321.166			0	1462	0	1830	2646	3012	2622	3834	4056	3484	5866	4172	4110	4116	4876	3778	5240	2244	3114	3998	4382	1536	4634	0
268.10590 Da 742.89 s	12.38	269.113			646	542	0	544	1268	1962	816	1528	1904	1816	2398	1832	1990	3146	3306	2798	3816	648	1642	1596	1828	736	1730	2108
292.12734 Da 743.76 s	12.4	293.135			4468	2526	5374	3750	4410	2512	3040	3288	3832	3962	2776	2980	3124	3686	3786	4378	4784	4148	2604	0	3352	1858	4746	4296
228.11150 Da 743.98 s	12.4	229.119			0	1238	2366	0	1656	1812	1468	0	1686	1798	1788	1488	2240	1880	2056	1506	2132	0	1590	1812	2098	944	2182	1784
286.17368 Da 744.21 s	12.4	287.181			2916	1520	2978	1698	2312	1640	2302	2436	2646	2884	1966	1664	2990	2280	3352	2010	3624	2284	0	2500	2550	984	3202	2578
296.15847 Da 744.62 s	12.41	297.166			3602	2338	3714	3128	4314	4524	4740	8538	7146	6792	7604	6116	6828	8154	8746	7360	7930	4702	5712	8964	8512	3484	10034	7690
180.11283 Da 744.52 s	12.41	181.12			8948	5638	7982	6590	8698	6066	7510	8502	6834	9886	6338	5116	7812	8520	9508	6728	8918	8550	6816	7540	6852	2924	9352	8456
318.14248 Da 744.99 s	12.42	319.15			1430	1112	1946	0	1560	1052	1296	2100	1900	1648	1662	1050	0	1940	1842	1202	2574	1474	1828	1716	2096	652	2328	1828
374.22601 Da 745.10 s	12.42	375.233			0	0	0	0	0	1870	3252	2582	3040	3994	0	1666	3132	3266	3624	2960	4466	3026	2812	3696	2678	760	3402	3418
276.13204 Da 745.18 s	12.42	277.139			3446	2124	4366	2208	3330	1918	2252	2824	3018	3092	2330	2400	3080	3374	4020	2636	4388	2918	2306	3720	0	1342	3312	4044
382.16510 Da 746.49 s	12.44	383.172	Neosolaniol	C19H26O8	0	0	0	0	0	2616	3086	8198	0	4060	0	3666	0	3732	0	4030	0	3172	2190	4460	0	2098	0	4190
256.06885 Da 746.67 s	12.44	257.076			2802	906	2960	2640	2260	1198	1674	1476	2148	1710	1324	536	1966	1534	2300	1402	2202	976	1794	1880	1800	428	1760	1810
346.23194 Da 746.95 s	12.45	347.239			0	0	0	0	2226	5796	5620	22486	6528	7026	6432	6352	2262	5070	5624	7718	6850	8058	10590	7168	9754	7942	10348	9228
368.21543 Da 747.22 s	12.45	369.222			0	0	0	1156	16602	31462	22520	111256	34624	37816	54764	29484	15316	35234	36790	37466	37792	36014	56272	35560	48024	26996	64456	48312
382.15527 Da 747.30 s	12.46	383.163			0	0	0	0	1894	0	4600	0	13694	0	66326	0	3196	0	3714	0	5602	0	0	0	3252	0	4256	0
388.18193 Da 748.77 s	12.48	389.189			686	0	574	2090	13964	28056	18300	50986	38394	38434	35680	19154	25036	51484	37812	35598	47790	25454	30658	37328	35276	12026	41772	41212
314.16866 Da 748.36 s	12.47	315.176			13272	8678	15900	8622	12044	8712	10622	10794	11160	13942	10312	4848	13614	10904	13096	10314	13916	11710	10806	14934	13612	3058	15272	12946
340.11175 Da 749.82 s	12.5	341.119			11314	10158	11584	8360	11472	7986	9768	14040	11208	11740	7692	1682	13982	9348	12088	7996	12268	9322	0	10608	10670	3746	12478	12414
198.12203 Da 747.38 s	12.46	199.129			45524	32564	36726	33232	43564	30010	41566	34902	42166	36196	28508	18676	47426	35852	40154	29958	44010	34028	28102	42402	33596	16374	45858	41958
359.26537 Da 749.06 s	12.48	360.273			702	4664	1336	11752	822	1204	444	3980	1412	3942	1936	7638	1384	8458	1338	2148	3362	4666	1858	9650	1918	7246	1138	2150
384.17532 Da 749.59 s	12.49	385.183			2254	1206	2836	1670	2864	1594	2428	4472	2682	3308	0	654	2292	1922	3206	2578	3478	2492	2694	2680	2372	604	3588	2562
504.09896 Da 748.91 s	12.48	505.106			0	0	0	0	1536	1642	1690	2970	3644	3034	2896	2422	2146	4856	3876	2560	3630	1800	2310	3144	2698	1018	3524	3518
380.19498 Da 747.44 s	12.46	381.202			0	0	0	0	2852	4304	6214	13268	7380	7492	8762	1076	3150	5034	5618	4894	5656	3102	8414	5874	8236	4110	9172	5216
438.22057 Da 747.79 s	12.46	439.228			1206	0	1196	0	0	1448	2148	2368	3044	2414	3928	0	2454	0	3578	1546	2776	0	3580	3186	3854	0	4988	4208
446.14056 Da 748.77 s	12.48	447.148			0	0	0	0	4132	7716	5128	11816	9916	11166	9978	6316	8026	13920	10922	11188	12246	6754	9186	9582	9392	2848	12238	9686
562.05740 Da 748.72 s	12.48	563.065			0	0	0	0	974	932	676	1490	1594	1630	1952	1634	1072	2922	1950	1182	1928	1006	1008	1654	1802	486	1816	1496
194.09062 Da 749.09 s	12.48	195.098			6936	5538	7640	5902	7850	9620	7312	7830	10146	8828	10110	7120	9200	8850	10572	10106	12164	8988	9352	9374	9770	5302	11208	11408
246.08417 Da 747.90 s	12.46	247.091			6416	2768	5702	3138	7030	3968	3944	3370	5292	5178	5738	3272	4252	4878	6566	4370	5892	5488	3672	5672	5242	1770	6744	5014
340.14537 Da 748.83 s	12.48	341.153			1578	0	1430	0	1338	3718	1864	1722	4172	4366	4968	2204	3798	6468	4594	3320	4312	1050	2262	4354	3186	1652	3624	2694
206.12804 Da 748.02 s	12.47	207.135	Ibuprofen	C13H18O2	5374	3492	5458	3416	4516	4566	5290	4530	5056	5742	5412	3124	5610	4942	6022	4556	6366	4880	4388	5608	4066	1940	5186	5500
268.06532 Da 748.26 s	12.47	269.073			2778	988	2522	990	2862	936	1420	950	2740	1890	1922	1246	1902	2250	2620	1772	2832	1958	1196	2218	1844	634	2440	2230
270.08481 Da 747.38 s	12.46	271.092			2584	1620	1988	1930	2130	1820	1304	1908	1582	2018	1140	1254	1838	1922	2308	2318	2728	1244	924	1836	1060	320	2040	1836
398.14225 Da 748.04 s	12.47	399.15			0	0	0	0	852	1964	2222	5090	3686	3164	4620	2406	2416	3218	3070	2786	3446	2274	2252	3638	3114	1290	2926	2960
396.21082 Da 748.17 s	12.47	397.218			0	582	726	556	1148	1490	1074	2334	1858	0	0	1044	1562	1686	1920	1728	2360	1064	1690	1764	1926	834	1978	2618
366.19998 Da 749.09 s	12.48	367.207			0	0	0	2082	54492	154116	104732	399826	184204	193090	206324	0	116038	264350	184746	192982	214210	152570	183852	171066	174740	122576	225202	201108
476.21337 Da 749.73 s	12.5	477.221			0	0	0	0	8170	8150	12564	23906	18560	13438	29154	0	11428	9214	21808	6820	21726	1402	33708	24630	40766	2042	53580	36998
456.16995 Da 750.81 s	12.51	457.177			0	0	0	0	966	1232	866	2834	1966	1824	2578	1010	0	0	0	1284	2290	1134	1750	1540	0	446	2400	1668
308.15833 Da 750.67 s	12.51	309.166			4574	0	5690	3822	7694	13084	7938	17222	17370	12850	19758	14200	14624	18510	22946	14196	18576	8016	13866	15000	17366	6034	18608	18600
454.25211 Da 748.78 s	12.48	455.259			0	0	0	0	3606	5702	7540	3474	12356	5706	21602	0	10476	3774	16036	2118	16676	628	15976	16836	20008	0	23222	21582
138.10326 Da 749.10 s	12.48	139.111			1880	1672	1866	1436	1970	1750	2252	2834	2854	2198	1604	1804	2120	2406	2288	2432	2620	3008	2130	2906	2054	1546	2702	2610
378.19993 Da 749.76 s	12.5	379.207			0	0	0	0	0	1548	1332	0	2392	1858	8358	1014	0	0	0	1210	3266	0	0	0	0	0	0	2426
392.21539 Da 750.49 s	12.51	393.223			0	0	0	0	0	3452	2646	5408	5180	4318	3778	3900	5350	6400	7350	5072	6424	0	5270	4280	5022	1362	5568	5802
274.11806 Da 750.66 s	12.51	275.125			6680	2172	3884	3514	1600	3228	2820	3600	2424	3130	1568	0	6114	3428	1770	1990	3372	2760	2052	3284	0	0	3028	3002
280.09084 Da 750.81 s	12.51	281.098			1640	1270	1996	1168	1936	1674	1730	1482	1854	1710	1070	0	1552	1362	2238	1592	3030	1470	1184	1664	1342	610	2462	2330
120.09275 Da 750.72 s	12.51	121.1			1262	1238	0	1126	1164	1230	1412	1536	1312	1602	0	958	1490	0	1830	1462	1532	1848	1758	1548	1688	1150	1446	1550
372.16635 Da 751.71 s	12.53	373.174			0	0	0	0	1660	2010	1808	5966	3024	3130	9022	1526	0	2596	3680	2578	4026	1172	5924	2670	5604	1238	6250	4322
344.21808 Da 752.25 s	12.54	345.225			0	0	0	0	10222	28584	27904	117906	30586	36792	29704	34352	20960	38112	32938	36770	32642	29954	39920	32840	34338	33298	46732	42380
444.26746 Da 752.36 s	12.54	445.275			302	0	0	0	1654	1156	2714	1640	4826	1798	5730	0	4074	896	6834	596	6172	0	7482	6044	8716	0	12384	8724
230.08912 Da 752.38 s	12.54	231.096			4404	3024	4278	2326	4112	2474	2706	2050	4124	3414	1970	0	3944	3366	3868	3298	4626	2910	2150	2534	3004	0	5508	3312
282.17996 Da 752.90 s	12.55	283.187			0	0	1438	1132	0	1568	0	2172	2226	2118	0	646	2116	2112	2468	0	2662	1278	2242	1922	2046	952	2490	2756
322.17400 Da 753.92 s	12.57	323.181	Zeranol	C18H26O5	2282	0	3066	1802	7030	17766	8520	18164	18322	15000	10372	4494	18720	20686	24210	16352	26310	7010	19844	19638	25820	3200	27832	23096
243.18204 Da 755.10 s	12.58	226.179			25220	33388	40068	34282	23658	27446	42748	43790	31320	27330	10654	4824	47396	23332	30928	28222	32568	23650	16886	34160	40382	14548	33320	30322
251.14980 Da 755.50 s	12.59	252.157			13054	5872	17442	6278	8656	4648	15664	9588	4372	9274	5120	2534	9428	9364	6842	6282	8744	6788	8548	12786	6766	1206	7928	8558
169.14536 Da 757.08 s	12.62	170.153			2410	1170	2404	1696	1854	1634	1808	1094	2058	2502	1360	496	1916	1414	2702	2248	2156	1868	1752	3284	1774	680	2350	2578
400.20550 Da 757.14 s	12.62	401.213			3336	2100	2860	1570	3358	1884	2672	2928	3012	4204	2212	714	2790	2898	3876	2068	3776	2092	1658	3064	2686	396	3840	3020
310.13765 Da 757.19 s	12.62	311.145			6500	4046	6956	4476	6798	3506	4428	4232	5466	6674	4130	1498	5952	5204	6686	5502	8016	4152	4038	5726	5092	0	7062	4864
341.25493 Da 757.33 s	12.62	342.262			2464	25260	5326	70546	2612	7662	1438	18440	3482	14772	5928	44156	5542	31538	5758	7166	12288	19482	4508	57920	6210	42344	2554	12438
318.17885 Da 757.57 s	12.63	319.186			0	0	1314	0	2450	24106	8372	2326	18078	18840	25220	14326	42030	50452	34860	29890	36342	2018	9680	28552	15240	6572	17852	25050
280.16350 Da 758.11 s	12.64	281.171	_1R,2E,7R,10E,12S,13S,15R_-12,15-dihydroxy-7-methyl-8-oxabicyclo_11.3.0_hexadeca-2,10-dien-9-one	C16H24O4	2708	1956	2880	2308	14932	35736	16814	44860	44638	34812	22644	12902	44052	52370	57070	34430	55254	14598	36158	47070	55380	11376	64236	54644
202.09635 Da 759.44 s	12.66	203.104			3426	2594	3794	2266	3200	2448	2950	2294	3100	3330	2026	862	2760	3012	3814	2670	4322	2728	2214	3176	2460	0	3408	3476
227.18705 Da 759.42 s	12.66	228.194	Andrachcinidine	C13H25NO2	13236	16158	15074	13776	7578	9132	12932	17644	9546	11850	4590	4542	23220	12598	9504	8784	10252	8170	7164	14028	17620	7512	10858	11866
236.10035 Da 759.17 s	12.65	237.108			15714	8192	14902	7150	13606	9246	10448	8774	14052	13548	8528	3290	11568	11376	16830	12602	17212	11348	10528	12350	10096	2264	16340	15800
255.18300 Da 758.12 s	12.64	256.19			2624	1760	2112	2010	1758	1742	2074	2062	2462	1726	1476	568	2050	2014	2540	1622	2568	2190	1914	2290	1806	748	2224	2240
281.19519 Da 759.32 s	12.66	282.202			26640	30242	52160	33212	23526	17546	21820	31714	25384	18688	12298	3684	52348	19248	27656	18302	27826	14166	8142	22730	36450	6694	29494	21810
267.17962 Da 759.24 s	12.65	268.187			33322	16812	29808	12944	7426	3208	11262	17602	5986	19516	5532	4382	18916	29526	8762	7908	9378	7458	12402	27506	32430	2092	11442	17942
402.25910 Da 760.95 s	12.68	425.249			0	0	0	0	3574	13700	11840	7896	20694	16726	10100	2338	41024	26418	58944	15680	46718	1672	18070	36742	25216	1470	33160	47712
658.26176 Da 760.23 s	12.67	681.251			3324	2188	3190	1968	3154	1678	2026	2120	2658	3636	1224	590	2202	3324	3206	2792	2630	2578	1370	2256	2468	530	2974	2620
213.17141 Da 759.15 s	12.65	214.179			5204	4186	4698	3394	1618	836	3164	4914	1256	5672	1458	1626	4588	8134	2032	2228	1706	2084	4614	5278	6872	1714	2394	4086
386.22615 Da 759.74 s	12.66	387.233			13098	6044	12178	4858	11160	4924	8692	8078	9650	11478	5842	2134	12060	8624	13306	6610	12148	6466	5208	11294	9110	1636	11520	11646
314.11137 Da 761.72 s	12.7	315.119			948	780	0	0	4280	9216	5898	12076	9874	7352	10130	0	9022	11438	14038	8258	14502	2010	9998	8458	11378	0	13696	13036
258.08452 Da 759.23 s	12.65	259.092	NCGC00168937-02_3-phenyl-1-_2,4,6-trihydroxyphenyl_propan-1-one	C15H14O4	5222	3048	5750	0	4404	2538	4538	3680	3866	4120	3060	962	4152	4136	4992	3886	5864	4406	2794	5494	3464	0	4758	5122
410.22599 Da 760.17 s	12.67	411.233			0	606	0	934	2388	4470	4706	8024	8608	6596	5192	2492	8124	9864	10264	5892	10358	4572	7728	6448	7710	0	7486	7560
126.10327 Da 761.44 s	12.69	127.111			0	0	320	0	996	2488	1426	2864	2804	2378	1418	1370	2738	3162	3054	0	2858	1352	2332	2532	2864	0	3154	3054
237.17059 Da 762.52 s	12.71	238.178			15938	12854	29052	8986	4596	1764	9498	13822	3282	1518	5722	3274	17148	23860	4014	5098	9072	8656	12054	17132	12598	2456	7042	14810
224.10106 Da 761.68 s	12.69	225.108			10186	7208	31376	9086	9256	4668	14320	7680	7752	12396	6530	6966	11016	9878	9456	8488	12434	15508	7722	8578	11954	3464	12688	20570
278.18917 Da 761.19 s	12.69	279.196			0	6460	13574	0	11936	2410	0	10240	2428	8870	4804	1392	6746	9074	4098	7804	6172	3586	14094	3564	2188	0	7590	5042
440.20025 Da 762.28 s	12.7	441.208			2358	1100	1410	1086	1726	840	1420	1240	1670	1550	1276	442	1716	1766	2034	1222	2058	1640	1140	1314	1420	0	1972	1652
150.10325 Da 762.86 s	12.71	151.111	THYMOL	C10H14O	1788	1410	1854	0	1702	2688	1670	2738	3134	2306	2066	1428	2662	3118	3218	2790	3068	2642	2942	2720	2592	0	3212	0
802.46658 Da 763.96 s	12.73	803.474			0	0	0	0	0	0	0	0	0	270	460	0	1572	0	2736	0	0	0	6758	3856	7214	0	9950	5392
344.21805 Da 765.00 s	12.75	367.207			0	0	0	0	0	118594	0	0	156580	0	0	94214	107248	204398	167232	0	186422	0	0	137230	0	68436	0	0
434.18786 Da 766.39 s	12.77	435.195			426	0	560	268	1046	1254	1502	2132	3698	2602	1860	242	2012	2278	3510	1048	3052	610	2166	2484	3842	0	4402	3250
424.20531 Da 766.45 s	12.77	425.213			3152	1718	2824	0	2878	1710	2550	2690	3736	3516	0	428	3786	2898	4002	2294	4568	1924	1596	3844	3414	452	3314	4246
350.20512 Da 766.88 s	12.78	351.212			0	0	0	2148	6310	15750	8508	25034	22842	16938	38894	8608	18462	22646	23682	14006	25806	0	19962	20324	24100	6716	30806	23130
218.09001 Da 765.00 s	12.75	219.097	NCGC00180715-02_2R_-2-_1E,3E_-penta-1,3-dienyl_-2,3-dihydro-1-benzofuran-5,7-diol	C13H14O3	7144	2960	7422	2954	6276	2546	3252	2532	4046	5924	2990	924	4866	4072	5732	3524	6652	3698	2256	4046	3712	0	4914	4752
422.22612 Da 765.67 s	12.76	423.233			0	0	0	1468	10988	75510	31588	14040	98304	80954	67850	18034	242982	145138	213212	66354	214468	2734	41204	145364	74594	9836	95212	155134
320.16097 Da 767.66 s	12.79	321.168			1524	1764	2796	0	0	2102	0	2902	4264	2874	3466	982	5628	3146	6570	2794	4418	1858	3556	1880	6360	0	5652	2516
402.22114 Da 766.31 s	12.77	403.228			40028	22226	42834	19936	43046	21082	29986	34408	38206	49786	22738	5558	43578	37906	50622	27598	50058	29680	22092	41636	41428	5068	44400	38836
385.28105 Da 766.61 s	12.78	386.288			1230	10674	1768	37718	1044	3028	646	11004	2172	10920	3168	22402	2190	28074	3398	3698	6628	8842	3226	26824	2746	18696	1556	5748
480.18469 Da 765.92 s	12.77	481.192			0	0	0	0	370	1106	692	0	1518	1704	846	188	4240	1888	4056	1210	3666	0	686	2198	1136	0	1522	2280
334.17384 Da 765.11 s	12.75	335.181			1506	0	0	0	1812	5962	2318	2378	7964	7768	11492	6920	8376	10624	8728	5512	8676	2470	3346	5816	4162	2972	4700	5200
438.25632 Da 766.01 s	12.77	439.264			0	422	488	0	0	1728	1058	0	2490	2046	0	0	0	2188	0	1558	2512	0	0	0	2318	0	2592	2578
276.13218 Da 767.97 s	12.8	277.139			5170	2750	4382	2200	4646	0	2758	4800	3554	4414	3728	0	3382	2768	4360	2924	5982	2442	2048	3010	4264	0	4596	3804
388.24183 Da 769.36 s	12.82	389.249			96030	47720	86822	29488	83240	46470	66416	68664	85806	95016	51768	17234	92708	67912	90912	55794	113206	61078	52852	85134	78806	15518	101306	86746
398.22640 Da 769.60 s	12.83	399.234	NCGC00381146-01_2-_5-_2-_2-_5-_2-oxopropyl_oxolan-2-yl_propanoyloxy_butyl_oxolan-2-yl_propanoic acid	C21H34O7	386	0	0	0	1290	4522	966	4874	3128	2630	2188	3856	2356	3596	2596	2182	6304	1304	1724	2818	2942	1622	4668	33608
367.26941 Da 770.47 s	12.84	368.277			0	16696	3874	43242	0	8102	0	12886	0	10920	2974	40896	0	24532	4640	6954	5482	16352	3490	18984	0	43626	0	6544
366.25990 Da 769.55 s	12.83	367.267			18312	13048	14912	8984	13204	10556	14528	13154	14148	17874	8704	4266	15622	14898	16790	12214	17834	17272	11040	17670	12166	5540	15846	15824
260.10073 Da 770.50 s	12.84	261.108	NCGC00179975-02_C15H16O4_Azuleno_4,5-b_furan-2,7-dione, 3,3a,4,5,9a,9b-hexahydro-9a-hydroxy-6,9-dimethyl-3-methylene-, _9aR,9bS_-	C15H16O4	151542	95364	184034	73270	132186	81062	109142	123584	114000	152686	85204	29452	135650	126452	152074	105780	165892	128544	102490	143508	127146	31940	150986	141040
354.15449 Da 769.21 s	12.82	355.162			0	0	0	0	1468	4902	1888	1906	4968	5646	7358	1698	5100	7396	6142	3864	6110	0	3700	4206	4282	1624	6044	4208
391.26976 Da 770.70 s	12.84	392.277			0	3754	642	15248	438	2510	0	6406	0	3032	0	9070	922	14208	0	2766	1018	3586	0	6202	514	10716	0	1662
402.17633 Da 769.72 s	12.83	403.184			0	0	0	0	15356	21782	20880	95042	39318	37630	52672	9022	15506	22382	32150	24270	38070	17878	38978	34126	53806	15822	67570	50868
166.02541 Da 773.11 s	12.89	167.033	Phthalic acid	C8H6O4	6960	4110	5384	3850	5896	5620	6546	5702	6194	8410	5134	2774	6044	7924	8474	7286	9402	7062	5996	6728	5654	2466	8610	8616
340.11164 Da 773.23 s	12.89	341.119			425656	237648	435516	165220	373242	237042	310798	288652	348990	399794	270656	68232	381896	332902	451514	324784	456618	252600	301634	364966	297212	54932	385388	394256
274.11611 Da 771.76 s	12.86	275.123			5628	2326	5010	1874	4518	1704	2498	2990	2980	4474	2056	1184	4098	4090	4266	2748	4704	2914	2062	3804	2916	0	3804	3526
432.26821 Da 771.95 s	12.87	433.275			4224	2104	4266	1090	3420	2140	2712	3034	2836	3846	2396	680	4428	3312	4952	3188	4240	2336	2382	3612	2950	520	3690	3750
338.10869 Da 772.88 s	12.88	339.116			400	0	0	0	1766	2072	1646	3530	2978	2762	3766	768	3008	3966	4164	2796	4812	1032	2522	3532	3534	670	3208	3572
436.22052 Da 773.88 s	12.9	459.21			0	0	0	0	5446	21062	18980	8686	40914	34024	31284	2146	56954	35110	64906	18230	60040	658	20332	53208	39838	2538	56908	50054
316.12680 Da 772.68 s	12.88	317.134			0	0	0	0	11094	17524	11468	27934	22648	19652	23930	9926	24132	24656	29810	20372	29808	6790	23118	19764	19774	5708	23788	28814
390.19956 Da 773.03 s	12.88	391.207			8066	10566	15690	8484	6476	7126	9562	12778	10542	8490	7160	1262	17118	7112	10840	8852	9894	4728	3914	9018	11546	3032	11048	7832
184.03568 Da 773.17 s	12.89	185.043	Methylgallate	C8H8O5	16242	10764	11400	7772	12324	9674	14372	10642	12638	14656	9238	4028	13846	13914	15942	16348	14356	12962	11200	12366	10048	4050	14150	14586
574.28459 Da 774.29 s	12.9	575.292			6976	4390	3630	2476	5860	3180	3374	1906	4104	5296	5142	0	3484	4198	4314	2516	3364	702	5322	4138	4486	0	4222	3682
182.12802 Da 773.10 s	12.88	183.135			8924	3028	6608	2916	6216	21886	7932	3526	12520	12950	3146	1588	5502	6650	18372	10040	32884	6462	8082	15486	2900	0	7128	24366
191.12974 Da 775.42 s	12.92	192.137	DEET	C12H17NO	7816	4606	5422	4346	4694	4498	7012	5470	6870	6532	3566	2470	6198	4638	6852	5046	7918	6402	5020	6520	5026	1608	7328	7216
238.11682 Da 773.63 s	12.89	239.124			14174	7746	12240	7344	13024	8554	10206	12952	12374	13398	9848	2814	13488	11228	15372	12920	14022	9700	9624	13866	13026	3394	13788	14902
380.21555 Da 776.93 s	12.95	381.223			0	898	1578	956	6320	14482	8628	37280	16056	17260	24334	7474	10480	21188	17296	15876	20832	11102	14416	16386	17888	7850	23056	34576
243.18200 Da 779.42 s	12.99	266.171			178630	59360	254686	53426	60090	21370	244374	159596	31874	178456	48188	19680	203624	217714	56832	43900	121268	86188	120560	241164	64448	23458	69946	136886
287.14589 Da 779.46 s	12.99	288.153			22322	5046	38288	4790	9160	2570	21154	16776	3428	21948	4636	1348	24186	21944	7208	3756	16012	6438	10320	25504	8916	978	9086	14566
207.16091 Da 779.23 s	12.99	208.168			13264	5702	12194	5150	3588	2584	26496	14022	2100	13202	3980	3420	15444	21402	4036	4824	9422	10578	11946	20618	5126	4522	6090	12108
244.06926 Da 778.87 s	12.98	245.077			50152	32980	55794	34946	49224	36642	35376	48114	46974	44110	34078	8082	48386	44842	62182	41450	58508	44814	34882	45508	42328	5946	48128	47334
197.17656 Da 779.39 s	12.99	198.184			3130	1420	3004	1058	976	536	5854	3634	598	3698	1446	794	4168	3884	1246	1178	2024	2202	3076	4008	1112	1020	1458	2980
614.27942 Da 779.01 s	12.98	615.287			4138	2734	3680	2274	3458	2506	2482	3446	3336	4814	2564	696	3424	3974	5034	2700	4194	2918	1692	3460	3434	574	4006	4268
162.10332 Da 777.71 s	12.96	163.111			2346	2092	2214	2234	2510	2658	2616	2478	2534	2820	1988	886	2620	2086	2698	2112	3330	2734	2626	3448	2712	1064	2586	3648
148.01480 Da 778.87 s	12.98	149.022	Phthalic anhydride	C8H4O3	17084	13124	13714	12020	13680	15626	17256	20534	17150	17978	12670	4600	20334	18176	18984	17416	17240	20200	14862	17100	16482	6370	16998	20056
387.29624 Da 779.41 s	12.99	388.304			742	9000	1572	32848	622	2468	0	6274	1210	10594	2052	16560	1474	20122	2554	3008	4506	6678	1284	15568	1782	13266	1302	3994
536.33044 Da 778.81 s	12.98	537.338			0	0	0	0	0	2480	2258	5114	3452	2908	1586	0	3378	5072	4144	3500	3596	1024	2884	4020	4496	0	5528	4352
418.16044 Da 781.44 s	13.02	419.168			1722	2412	1138	2494	1474	1016	1418	3118	1292	2362	1228	894	1728	1802	2118	1766	1776	2192	1186	1880	1586	618	1786	1638
350.20481 Da 780.90 s	13.02	351.212			0	0	0	2770	0	26072	9884	25376	17982	18008	27604	18448	18996	36362	26728	31204	28936	16304	0	20562	20010	12684	0	28212
314.11120 Da 781.11 s	13.02	315.118			0	662	1370	0	3868	7162	5356	11758	9856	8768	11036	3662	9878	9834	13012	7590	12734	3962	8864	7680	9248	2150	11318	12804
436.24123 Da 780.99 s	13.02	437.248			644	0	674	0	1312	1500	0	2914	2648	2268	7032	0	2064	1742	2218	1354	2030	706	1510	1842	1680	522	1968	2132
400.15206 Da 781.36 s	13.02	401.159			5050	4480	2520	4370	3330	2498	2912	5738	3332	5334	0	0	4386	4662	4582	3890	4486	3758	2332	4632	3266	1968	4462	4308
440.14289 Da 781.38 s	13.02	441.15			26314	22034	22828	22314	28242	11668	11556	24754	17862	28094	9522	7208	20538	22436	27968	18396	24758	13458	7088	17350	15716	4636	20564	22640
312.19051 Da 781.60 s	13.03	313.198			4544	3328	4710	5716	4210	2814	3250	3736	3752	4082	2940	3128	5268	3824	5464	3856	4744	5852	3118	3310	4012	2328	3318	3496
230.08977 Da 781.70 s	13.03	231.097			3926	2490	4156	2686	3252	3662	2442	2062	2868	3468	1716	0	2636	2164	4178	2570	4118	2468	2064	2874	2522	0	2646	2998
404.27539 Da 782.63 s	13.04	427.265			1038	906	1180	918	38948	27426	51806	21186	89166	43798	79056	1206	144582	17288	253228	12410	194110	1148	274216	198536	350356	0	457782	313732
236.13777 Da 781.85 s	13.03	237.145			12306	8170	11170	7632	11588	7526	8292	9912	10608	11488	0	5472	11724	11662	12276	10148	12544	10458	7662	9574	9744	0	12376	10450
259.21325 Da 782.97 s	13.05	282.202			317764	113582	302640	85076	94254	27324	298564	233786	38544	285788	76354	42292	249636	404516	54356	65936	169682	96768	153940	228402	183842	41172	97074	215124
227.18711 Da 782.93 s	13.05	250.177			107794	44996	107718	33836	30398	10880	103290	83482	14038	88938	31830	18528	83498	132838	16188	26240	53642	33438	59754	73790	66954	20562	31336	68012
210.16029 Da 782.95 s	13.05	211.167			26870	11802	19634	8286	7950	4300	41956	26846	4614	31358	7388	6508	24070	40400	5968	9182	15162	11680	20526	28862	19138	8604	10956	23826
174.13957 Da 783.04 s	13.05	175.147			12678	5520	9834	4904	3918	2016	18122	12466	1980	13870	3208	3064	10396	18124	3036	4430	6546	4254	11604	11792	9608	4252	5048	12384
240.16887 Da 784.02 s	13.07	241.176	N,N_-Dicyclohexylthiourea	C13H24N2S	24218	7770	21596	8568	15660	13418	15772	5026	16084	19298	10048	1752	14600	5414	24654	16804	25182	24142	14742	17870	10062	2670	18470	20818
212.13760 Da 785.02 s	13.08	213.145	Dihydrojasmonic Acid	C12H20O3	32264	19818	30666	21534	27266	19758	22836	23050	24588	27294	19940	7404	23444	24718	30494	22408	36858	27246	22744	29230	21670	6244	28200	29624
484.21537 Da 782.57 s	13.04	485.223			0	0	0	0	936	754	1684	618	4850	1338	1468	0	3524	422	5868	644	3690	0	3508	3866	6278	0	8246	5576
108.09290 Da 782.76 s	13.05	109.1			2188	1206	1710	1452	1322	1632	3346	2812	1442	2690	1122	1146	2160	2898	0	1734	1926	2110	2626	3014	2100	1094	1616	2448
369.28603 Da 783.11 s	13.05	370.293			5136	90306	10500	298636	5844	38376	2290	62764	8684	75084	15812	294888	8104	166814	18300	24448	25912	35782	8774	160114	14064	192236	4918	39342
784.45579 Da 783.00 s	13.05	785.463			0	0	0	0	792	0	1220	0	1382	988	644	0	3662	1124	6796	1042	3998	0	10106	8798	11190	0	16580	10962
257.27026 Da 784.75 s	13.08	258.278			2352	3120	2372	5104	2530	2264	1988	14366	1860	0	2042	4270	2934	9226	2306	2832	2574	3282	2682	2324	1844	2248	2562	2664
444.26794 Da 785.70 s	13.09	445.275			6688	3574	5850	2676	5930	3542	3908	5664	5184	6272	3440	1286	6398	4842	5978	4056	6712	4818	4828	5658	5028	1266	6498	5468
348.18936 Da 787.34 s	13.12	349.197			0	0	0	3058	21380	154478	40936	54428	115386	126030	115194	263022	150278	360070	154004	193056	191710	72492	57168	111994	104216	130444	122024	131790
276.13206 Da 787.11 s	13.12	277.139			89120	53916	106136	64826	101872	41334	57656	67864	68014	86274	54008	21888	94800	87220	97144	70386	85878	84014	57216	83740	87676	18648	91494	76868
460.26340 Da 788.36 s	13.14	461.27			20226	9822	20584	9458	20908	8728	13470	15964	15526	19826	13446	4060	17328	15900	19536	13334	21210	14358	11614	18008	12970	3472	20252	16946
428.13006 Da 787.04 s	13.12	429.137			0	0	0	0	578	2266	478	1044	2026	1830	2296	1744	3476	4906	2654	2930	2716	948	892	1818	2020	888	2660	2314
424.14897 Da 786.94 s	13.12	425.156			69886	53864	105286	52774	104686	30446	35854	67716	49100	78000	47026	15622	89228	70208	65584	48104	55648	42422	40420	51394	69114	14912	81918	49008
438.16051 Da 787.41 s	13.12	439.168			0	0	0	0	0	1764	0	1028	1666	1838	1954	1420	2522	5072	2202	2016	3160	782	0	1484	1790	534	2146	1516
118.04069 Da 788.45 s	13.14	119.048			4870	3494	3140	4720	3852	3280	4298	4268	3194	5690	2448	2150	4132	4526	5124	3820	4698	4896	2732	4186	3128	1998	3834	4760
194.12830 Da 786.82 s	13.11	195.136			14554	11728	12056	11538	13238	9650	13106	12406	11620	12948	8476	6774	15728	15404	15570	14046	13376	16616	12132	15046	13226	7352	14614	12586
386.17058 Da 789.60 s	13.16	409.16			1027112	390718	641764	579092	430766	457964	629368	437810	745002	840708	256094	360068	365834	790946	1167846	495812	1042230	709296	279792	742204	289418	295626	465660	868378
146.05673 Da 789.32 s	13.16	147.064			7038	3006	2356	4614	2800	4270	7340	3044	4976	6230	1590	3076	2790	6838	9590	4768	6934	6954	1908	7174	1904	2952	3120	7512
438.28093 Da 788.57 s	13.14	439.288			6898	4702	6856	4156	7274	4382	6932	6172	6800	8938	4626	2008	6476	6956	8442	5904	7530	7860	5748	7358	7194	2296	8286	8398
152.11894 Da 789.29 s	13.15	153.126			4568	2510	2820	2470	2792	2286	3290	2594	2658	3656	2562	1992	4114	3698	4472	3102	3232	3856	3036	2550	2748	1434	3432	4624
192.11207 Da 788.70 s	13.14	193.119			6502	5350	9036	5584	6818	4808	4726	6742	6096	7260	5520	2638	7612	6790	6106	5300	6260	6276	6178	5596	7018	2606	7440	6548
413.31211 Da 789.31 s	13.16	414.319			842	15044	1150	58224	666	4808	540	11366	1052	17888	1786	58468	956	37836	2682	6304	3394	10432	1248	17866	1510	37214	1050	6234
262.08085 Da 790.25 s	13.17	263.088			1904	1408	794	1590	948	1460	1700	4196	1584	3570	504	3056	2580	6190	2878	6416	7450	37082	2194	6452	1362	11274	1750	3456
261.17131 Da 792.61 s	13.21	262.179			7550	3220	7910	1282	1290	0	3482	4358	1086	9212	3248	0	8352	5706	0	0	1776	0	7692	10220	2370	408	3284	4860
240.13221 Da 791.81 s	13.2	241.139			29010	18392	41842	20854	32896	14550	20492	27116	23126	26996	24358	12008	34590	24766	29296	22460	26922	26580	20752	23832	29682	16666	30742	20992
200.13978 Da 791.51 s	13.19	201.147			2656	1730	2344	2420	2258	1452	2392	2254	1984	2428	1326	1204	2692	2040	2948	2078	2716	3458	2186	2936	2620	1930	2412	2360
424.30158 Da 793.19 s	13.22	447.291			79950	46786	86546	49330	85720	42918	63206	71182	77466	93890	53234	24480	84088	65412	86924	57560	87872	64602	53192	80502	78182	21804	80892	79702
372.24900 Da 792.54 s	13.21	395.238			0	722	0	0	7618	19434	10570	40126	33018	27936	20374	18946	26712	37574	25794	15928	26102	5056	21352	33018	29466	9082	36846	33790
406.14541 Da 794.39 s	13.24	407.153			0	0	0	314	2462	6144	3398	3888	10426	8854	8778	0	6988	10636	8106	7224	9298	2252	3048	5166	7358	2510	8328	6932
462.23363 Da 794.66 s	13.24	463.241			0	0	0	0	1996	968	1980	2772	3720	2010	4142	0	2168	766	4382	1048	2656	0	7674	3422	9542	0	14642	5340
292.12711 Da 792.00 s	13.2	293.134	2-_2-_3,4-dimethoxyphenyl_ethyl_-4-methoxy-2,3-dihydropyran-6-one	C16H20O5	4300	2974	6384	3160	4274	2136	3268	3616	3666	4980	3194	1636	5002	3714	5104	3706	3968	4128	3362	4382	4378	0	4686	4040
434.22632 Da 794.35 s	13.24	435.234			1692	1120	2094	1484	954	750	1306	1868	1476	2104	1670	622	1802	1784	1380	0	1870	1186	1550	1572	1732	906	2252	1812
222.10618 Da 794.94 s	13.25	223.114			30422	21618	18024	11954	26084	10768	8396	30796	15184	18706	8280	6566	7390	14694	11214	10146	15524	1380	18372	15020	17714	11396	24962	31832
280.09138 Da 796.74 s	13.28	281.099			20860	11960	17574	12156	16180	11814	13404	15444	15764	18746	12148	8814	18494	15948	20162	14504	23544	19216	12792	16998	13498	6974	16280	19604
252.13234 Da 796.66 s	13.28	253.14	_8aR,12S,12aR_-12-hydroxy-4-methyl-4,5,6,7,8,8a,12,12a-octahydro-1H-3-benzoxecine-2,9-dione	C14H20O4	10420	6548	9464	6352	8582	6000	9040	7612	8280	9104	6868	9902	9270	8650	11164	10150	10178	26198	7940	8750	8408	4700	9034	9398
439.32761 Da 796.17 s	13.27	440.335			0	2444	0	12280	0	824	0	1880	0	3324	0	14278	0	8254	302	1412	0	2436	0	1964	0	12016	0	788
395.30145 Da 796.07 s	13.27	396.309			0	9328	440	58224	292	4276	0	9386	222	12986	880	92852	388	35778	1144	5818	1202	6582	578	11852	706	35370	500	5074
210.12209 Da 797.37 s	13.29	211.129			14466	8386	12546	8190	11754	6760	9938	11416	10068	12810	7952	5856	12512	9744	10884	9252	14036	11588	8180	9864	9106	4224	11118	9870
452.27292 Da 799.37 s	13.32	453.28			282	0	384	186	1332	3308	1948	6288	4128	3316	2866	3566	3540	0	4870	3202	4808	1934	4312	4300	5310	2732	5472	4726
226.09582 Da 800.13 s	13.34	227.103			3098	1206	2082	1656	2402	1230	2416	858	1648	2434	1442	950	1888	1854	2076	1914	2998	2188	936	2090	924	1130	1544	2296
421.31709 Da 799.46 s	13.32	422.324			0	2262	0	15406	0	1218	0	2168	0	3068	0	24842	0	7714	0	2076	0	3530	0	1572	0	20616	0	876
375.25005 Da 799.91 s	13.33	398.239			263454	126580	101728	206860	91602	119600	284056	120164	175482	226676	97198	117194	118142	273148	342028	123218	568624	158390	64684	236460	95522	75986	89122	338036
352.22118 Da 800.43 s	13.34	353.228	_1R,2S,3S,4R,4aS_-2,3-dihydroxy-3,4a,8,8-tetramethyl-4-_E_-3-oxobut-1-enyl_-2,4,5,6,7,8a-hexahydro-1H-naphthalen-1-yl_ acetate	C20H32O5	1336	1208	1204	3116	38356	100414	55006	250666	102492	102014	121814	74806	35202	95034	50670	110038	81704	62254	60862	42378	76624	87380	77350	102720
330.23876 Da 801.12 s	13.35	331.246			0	0	0	448	3568	12868	7980	33446	10088	12408	11728	7452	4154	10260	4778	13684	9558	8808	6124	5744	7748	11916	9652	11748
609.42305 Da 800.03 s	13.33	610.43			14610	5804	4212	10734	6302	7228	10436	2710	12222	19864	6630	1496	11966	8176	13392	4238	12670	1770	6218	12366	7468	1828	5508	11376
325.99910 Da 799.83 s	13.33	327.006	Tris_1-chloro-2-propyl_phosphate	C9H18Cl3O4P	4746	3718	3840	3268	3522	3466	4884	4374	3692	5044	2088	2170	5466	3216	4236	4450	4676	4770	3014	6280	5020	1698	4488	4478
392.27686 Da 799.86 s	13.33	393.284			31596	16286	6352	23806	7508	12724	46618	14370	18188	28796	6682	8880	14810	25524	36552	15108	61602	21500	5412	27876	10782	9358	10572	40926
442.19090 Da 800.69 s	13.34	443.198			264	0	0	0	2068	3704	2022	6426	3648	4302	5248	1680	2118	4646	2502	4088	3768	1636	3246	1972	3152	1666	3004	3672
347.98097 Da 799.97 s	13.33	348.988			19014	9988	19804	10024	14410	9306	12218	12674	13652	15328	11296	8118	15538	13242	15420	13272	15714	12520	10406	19542	13248	5470	15574	13992
631.40507 Da 800.73 s	13.35	632.412			2892	1208	0	2044	2204	1382	1308	908	1762	2322	1872	0	2526	1480	1936	854	1370	552	1496	1970	1796	716	1676	1340
420.14245 Da 801.40 s	13.36	421.15			0	0	0	0	5100	8854	9046	15412	13968	13736	19582	2392	6364	8510	10224	7454	11990	2458	12510	11046	22532	5398	20648	10942
401.34850 Da 802.76 s	13.38	402.356			2538	1578	2202	1764	1610	1454	2030	4018	2058	2374	1364	1028	1378	1884	0	1380	2346	1908	1054	2832	2166	856	0	1438
402.25746 Da 802.91 s	13.38	403.265			1884	1230	1906	980	2008	1420	1668	1524	1480	1688	1042	1014	1688	1490	2020	1492	2064	954	1038	2434	1552	646	1838	1774
246.12173 Da 802.08 s	13.37	247.129	NVE_247.1330_17.3	C15H18O3	5560	7074	10236	4670	0	2712	10456	2364	5228	4374	3114	1802	3986	2726	7834	2802	5448	0	7454	5526	5024	2096	4886	5062
416.17915 Da 801.52 s	13.36	417.186			0	0	436	0	918	1442	944	1390	2082	0	1914	1564	1952	2346	0	1780	0	0	1978	2332	0	0	0	0
338.16910 Da 802.38 s	13.37	339.176			3840	1854	2514	1838	2768	1550	2256	3200	3604	2396	1836	1470	2248	1544	2714	2932	2446	3392	2704	3014	2102	1364	2248	2246
260.13720 Da 802.63 s	13.38	261.144			3492	2436	3846	2738	2860	2072	2716	3108	3270	3476	2076	1816	2734	3394	3538	3040	3838	2908	2314	3216	2706	1732	2930	2728
434.26263 Da 803.30 s	13.39	435.27			0	414	0	266	0	3850	2060	6726	3876	4030	2534	3752	3692	6194	5474	4906	5616	1112	5102	5398	6610	3518	10086	6110
234.12236 Da 804.62 s	13.41	235.129			50966	34066	46598	40308	44062	29448	33476	41630	36556	57274	32096	35394	47472	45786	51270	54158	52332	44442	29862	50966	28234	26862	43786	44846
244.10576 Da 804.71 s	13.41	245.113			15574	7846	10594	10100	9274	8610	10092	7310	10460	15042	7396	5940	11568	8922	14436	11654	15344	9706	7732	11418	7318	7668	9028	12392
268.12721 Da 805.19 s	13.42	269.134			5816	3328	6094	3312	5804	2824	4504	4004	4718	5898	4156	3114	6180	4300	5742	5294	5656	3866	4548	4508	4754	1838	5986	5566
254.14794 Da 805.74 s	13.43	255.155			80154	41948	62768	46616	68404	46814	51342	59458	59076	65552	53620	47712	72956	57258	63920	69700	69254	60358	59794	62550	62322	46494	68062	65520
426.25737 Da 805.78 s	13.43	427.265			876	0	0	0	29712	22716	38462	19040	73784	37668	80464	2610	103456	20940	147554	23804	115750	1028	210808	132714	216954	1962	321814	232588
292.14565 Da 805.63 s	13.43	293.153			3284	2112	2260	1604	2408	2020	0	5846	1954	3104	2554	1090	1760	2600	2666	1528	2450	0	3146	2624	3532	2392	4118	3196
422.26238 Da 805.34 s	13.42	423.27			646	396	0	652	1622	4320	2046	6402	3498	3646	2046	4834	4490	6762	5926	4968	6026	972	5540	5520	5818	4260	6858	5970
540.28713 Da 807.20 s	13.45	541.294			1726	1346	1560	1420	2404	1474	2088	2964	2504	3084	1764	642	2164	2654	3240	3148	2580	2582	1796	3670	3668	494	3616	3112
148.12402 Da 804.83 s	13.41	149.131			1836	1350	1332	1678	1514	0	2046	1678	1548	1834	1194	1220	1968	0	1754	1990	1768	2230	1288	2186	1208	1758	1936	2048
402.16609 Da 808.37 s	13.47	425.155	_2R,3R,3aR,5R_-5,7-dimethoxy-2-_7-methoxy-1,3-benzodioxol-5-yl_-3-methyl-3a-prop-2-enyl-2,3,4,5-tetrahydro-1-benzofuran-6-one	C22H26O7	226956	113992	241634	151830	207904	84766	108656	154998	149904	264136	93874	64924	176498	173686	215214	135540	171890	103458	73460	175800	138862	59960	151092	138148
496.32310 Da 807.60 s	13.46	519.312			9860	4808	10084	6068	8598	4300	7512	8590	8054	9868	5254	3474	7796	10152	10150	7826	9880	9760	6922	8596	8410	2564	10768	10538
315.27584 Da 807.63 s	13.46	338.265			14784	10064	18152	12110	12910	8450	10680	10928	13322	12076	8098	6008	11286	8038	11438	8868	12330	10294	6906	10660	15018	8356	10908	10254
441.34332 Da 807.10 s	13.45	424.34			0	0	0	27516	0	620	0	2254	0	2374	214	59670	0	11580	0	1704	0	7860	286	1822	0	67992	0	326
118.04075 Da 808.81 s	13.48	119.048			4944	2908	3804	3758	4006	2812	3512	5152	3624	6574	2068	2478	4802	5520	4928	2874	4076	3298	2474	4412	3860	2536	4220	3320
298.17399 Da 808.59 s	13.48	299.181			65354	43370	73328	47360	62656	32822	48860	56400	52424	67242	42462	44944	63224	64566	62282	44938	58710	59892	44060	60138	56902	37516	59852	55618
170.12947 Da 807.84 s	13.46	171.137			10700	6734	9604	7932	9478	7332	11640	11024	8740	12762	6396	6494	9920	8866	11904	8688	9916	11930	8782	10894	10470	7232	11426	10302
350.14753 Da 808.82 s	13.48	351.155			3050	2500	4002	2992	3342	1914	2146	2610	2684	4190	1690	1798	3158	2708	3180	2638	2890	2824	1762	2916	2068	1572	2514	2350
197.17657 Da 809.07 s	13.48	198.184			1938	1390	2154	1604	1806	1036	2100	1626	1358	2258	1318	1248	1558	1800	1416	1368	2542	1962	1800	2316	1814	1214	1296	1738
314.20544 Da 806.69 s	13.44	315.213			5516	3524	5540	3406	4608	2888	3824	5276	4420	5048	3790	2646	6336	4280	5274	4234	4800	4004	3426	4362	4128	2460	4842	5170
208.14412 Da 807.78 s	13.46	209.151			23124	12834	18852	14504	23346	14900	19158	17414	17440	22556	14612	12952	20870	18902	20080	15366	24774	21182	17860	19422	18162	12562	22870	19918
458.22555 Da 808.80 s	13.48	459.233			0	0	0	0	696	1168	1210	1248	1522	1536	1602	1570	1662	1908	1650	1096	2110	324	2026	1614	2454	1368	3418	2642
766.44561 Da 810.06 s	13.5	767.453			0	0	0	0	680	0	1130	2018	2016	1434	634	2934	4952	3276	9546	2156	5994	0	4528	10078	8222	1448	16102	8768
460.24194 Da 810.35 s	13.51	461.249			0	0	0	0	848	1784	1214	1606	2312	2436	2378	1816	1712	2182	2350	1434	2566	0	2722	1694	0	924	0	3072
332.15831 Da 810.10 s	13.5	333.166			3724	4514	6172	4592	3648	2524	3118	2728	2800	3870	2296	4786	4118	3698	3912	2868	3218	6222	2810	3234	3186	2858	3486	4742
316.16336 Da 810.62 s	13.51	317.171			47726	66518	55304	73830	37712	28800	23070	37470	21550	39618	21250	72916	30098	50196	29668	43946	42266	112542	20340	30690	24686	42620	35896	61404
482.34342 Da 812.00 s	13.53	505.333			53834	38632	57284	36838	43044	30140	41428	48494	49644	53112	27682	16696	61590	40882	51178	41070	53580	36332	27888	50658	47626	19748	49920	50056
262.11635 Da 811.28 s	13.52	263.124	8-hydroxy-5,8a-dimethyl-3-methylidene-3a,4,4a,8,9,9a-hexahydrobenzo_f_1_benzofuran-2,7-dione	C15H18O4	29148	19366	32206	30890	22460	13152	19814	18348	18892	23630	14182	23534	21896	22122	22062	18358	21146	29380	16906	17754	21134	15566	21190	19254
291.21659 Da 813.00 s	13.55	292.224			3572	4812	6174	3856	3038	2844	2784	0	3542	2940	1724	1616	6952	2090	3208	2340	3150	1960	1368	3492	4864	3026	2860	2686
294.17986 Da 813.11 s	13.55	295.187	_6_-Gingerol	C17H26O4	11510	11266	8436	11242	9066	9272	9568	12904	9248	15374	7130	11186	13282	15284	12850	11928	12624	26008	7654	11852	8290	10322	13852	16672
279.18377 Da 814.14 s	13.57	280.191			0	2796	3634	0	2792	1016	0	0	1446	0	2676	0	4668	0	1568	2444	2542	0	5092	0	0	1132	3684	4518
394.13744 Da 813.81 s	13.56	395.145			13240	8128	13418	9994	13700	6708	8204	9346	9354	14508	6170	4898	10132	11468	13086	6428	10674	7272	6356	9980	10142	3378	10266	8846
348.18936 Da 813.22 s	13.55	349.197	NCGC00380451-01_C20H28O5_2-_3-Furyl_-7,8-dihydroxy-6a,7,10b-trimethyldodecahydro-4H-benzo_f_isochromen-4-one	C20H28O5	2032	0	1596	0	20720	78766	34350	34908	75422	65124	50790	53634	75334	69150	75238	43964	77902	7446	74228	72300	88648	37644	119366	99886
474.22035 Da 813.50 s	13.56	475.228			0	0	0	0	568	852	716	1790	1350	2108	1914	1630	1688	2110	1892	1238	1954	0	1906	2096	2190	1354	2854	2572
296.23220 Da 814.50 s	13.57	297.239			1662	1708	1332	1212	1012	1084	1878	2086	1294	1568	1880	798	2082	1276	1666	0	1722	1662	0	1712	1564	1344	1326	1700
206.12783 Da 814.78 s	13.58	207.135	Ibuprofen	C13H18O2	4846	4368	4904	4054	4678	3730	4300	4154	4810	5634	3456	3740	5576	5164	5080	4146	5424	5746	3862	5356	4794	3378	5250	4526
362.20509 Da 814.78 s	13.58	363.212			3906	1698	2644	2878	2900	2434	2460	2696	2792	0	1748	15042	3646	3278	3696	0	4556	2286	0	2866	2856	0	3076	8944
269.23400 Da 815.99 s	13.6	270.241			1240	1914	1428	1530	1026	1040	2714	2936	1582	3436	744	578	2824	0	1714	1028	1014	954	864	2060	1626	1486	1226	0
166.13447 Da 815.04 s	13.58	167.142	Dihydrojasmone	C11H18O	2714	1774	1998	1766	2626	1856	2168	0	2526	2910	2448	1706	2584	2882	2674	2352	2600	2986	2372	2572	2338	0	2180	2734
414.20132 Da 817.23 s	13.62	437.19			15928	7374	7568	25948	7148	9152	7304	10440	9104	11400	4736	27194	4682	21648	18984	8658	22550	5416	4844	23676	5886	9210	22774	18894
418.23132 Da 815.73 s	13.6	419.239			42462	38006	46534	44704	31274	25112	25300	30376	30698	43958	24046	46416	35238	41326	50436	44412	43452	57448	26182	34984	33944	36890	35170	45300
340.18576 Da 815.24 s	13.59	341.193			3122	3392	1906	3232	1716	2102	2374	3006	2070	4028	1488	3836	2746	3312	3232	3086	3042	4710	2186	3306	2362	3010	2832	3302
144.11385 Da 815.76 s	13.6	145.121			2172	1226	2056	1548	2188	1570	1310	1828	1244	2130	936	1774	1700	1758	1672	1284	1990	2804	1496	2216	1518	1046	1776	1958
262.15332 Da 816.56 s	13.61	263.161			4644	3612	4422	3458	3758	2532	2626	3656	3502	3518	2678	2434	3692	3320	4246	3334	3596	3468	3352	3924	3352	2486	4154	3928
234.17166 Da 817.16 s	13.62	235.179	LID_235.1805_10.1	C14H22N2O	470806	217718	0	338182	313478	0	0	0	0	664558	982140	62296	478044	0	444208	0	0	0	0	0	0	101824	0	355540
376.22046 Da 817.59 s	13.63	377.228			2094	2578	2216	4888	1966	0	3834	2794	4460	5004	3874	4082	6038	4994	5884	5810	5660	2144	0	3082	3680	1826	3786	4770
248.13793 Da 819.02 s	13.65	249.145	reynosin	C15H20O3	12184	6170	10608	8450	12950	8006	9674	11102	9972	10684	8212	6076	10058	8748	10888	9910	11530	10418	8722	10154	8992	5800	11204	10620
218.12800 Da 819.20 s	13.65	219.135	Pterosin B	C14H18O2	2292	1660	2106	1728	1930	1396	1838	2098	1958	2460	1678	1478	2550	2178	2642	2520	2108	2496	1614	2198	1964	1444	2956	1912
340.22119 Da 819.25 s	13.65	341.228			1522	1376	2052	1948	1884	1588	1424	1644	1802	2416	1896	1508	1816	1874	2474	1888	2158	1750	1426	2080	1610	1536	2030	2122
282.17914 Da 819.59 s	13.66	283.186			7208	2670	5486	3034	7084	3396	5448	5428	5298	6734	5262	3838	6948	5526	7364	5234	6448	5766	4612	8182	4542	3076	7582	6588
352.22134 Da 822.63 s	13.71	353.228			2104	1676	1942	2962	23926	84090	35734	153714	64416	72156	86942	71630	29848	79742	49506	101144	81156	58584	63800	48096	83878	88870	98206	92786
200.07742 Da 822.02 s	13.7	201.085			3526	2920	4494	4204	3450	1930	2518	2452	2736	2830	2844	5046	3864	3008	4092	3738	3022	5780	2592	3076	3192	3194	3726	2306
442.19114 Da 822.90 s	13.71	443.198			0	0	0	0	1474	3006	1516	4538	3014	2876	4666	2144	1572	3732	2626	3786	4774	2668	3094	1990	3622	2134	3906	3758
148.05119 Da 820.57 s	13.68	149.058			1434	1550	1058	972	1626	994	2028	1580	1302	1954	864	892	1624	1402	1602	1738	1326	1980	1520	1690	1326	832	1718	1660
309.22678 Da 822.16 s	13.7	310.234			8078	5030	6806	4026	2654	1992	12524	12708	1718	15110	2486	3138	7022	23606	2970	2716	3672	2992	5422	9964	4726	4486	4104	8166
748.43489 Da 821.26 s	13.69	749.442			0	0	0	0	0	0	302	616	850	1070	448	3600	2088	2936	5834	1802	2944	0	1860	4958	3076	1360	6172	4264
386.18152 Da 824.07 s	13.73	409.169			232190	159356	145414	155836	153024	126892	146530	217332	176458	233056	78796	130702	128444	0	135926	0	0	152038	0	155168	110832	80486	208228	225534
272.13738 Da 824.87 s	13.75	273.144			9996	6850	10592	7154	9942	4074	8628	7184	7026	8496	6464	4934	9926	8766	9322	5818	9756	8906	7658	9670	8398	4234	8690	8546
406.23105 Da 825.56 s	13.76	407.238			0	0	0	1838	3576	7762	3932	9194	7964	7802	4836	8626	8784	10672	11950	8830	11302	1852	9196	9022	11702	6316	10978	10670
440.27282 Da 825.13 s	13.75	441.28			754	0	0	0	792	722	914	0	1248	0	1296	0	2082	0	2394	0	1866	0	2110	2422	2604	0	3998	3272
250.15368 Da 825.73 s	13.76	251.161			12592	8674	9422	8268	12020	6378	11970	10626	9910	11054	8932	7828	10338	9226	11622	7704	11158	10420	8736	11772	11280	5954	11936	10172
540.38528 Da 827.44 s	13.79	563.375			26544	13768	20764	15104	22750	13680	18796	17398	22890	22048	15204	11104	22472	22594	26822	20392	24524	18728	14188	21196	23504	8014	25028	21626
408.24684 Da 827.60 s	13.79	409.254			5358	1586	4206	4078	5356	8618	3614	5704	7778	10558	4702	11364	12160	11050	9614	7276	16060	2290	5920	14680	5432	4762	11356	18822
238.15305 Da 827.68 s	13.79	239.16			148800	88234	127458	95464	153244	82536	110078	88386	134080	136520	106232	90214	120410	128110	163536	108988	144826	130232	101040	120992	138918	53312	137650	119374
166.06091 Da 827.49 s	13.79	167.068			4672	3972	3994	3548	4390	3688	5200	3582	4150	6772	2752	2998	4408	4876	5184	4186	4080	6416	3996	4840	4290	1906	5190	4864
406.13940 Da 827.11 s	13.79	407.147	methyl _1S,4aS,6R,7R,7aR_-5,6-dihydroxy-7-methyl-1-_2S,3R,4S,5S,6R_-3,4,5-trihydroxy-6-_hydroxymethyl_oxan-2-yl_oxy-1,4a,5,6,7,7a-hexahydrocyclopenta_c_pyran-4-carboxylate	C17H26O11	7940	4402	5884	6418	7610	3464	5268	4958	4746	12466	2956	3160	5224	7058	8464	2806	6002	4788	3924	6304	6482	3182	8140	6366
272.10023 Da 826.78 s	13.78	273.108	ANGOLENSIN _R_	C16H16O4	7292	3506	6984	3804	6206	3488	5374	4922	6792	7128	4884	4364	4014	7032	6952	5678	7432	8046	4150	5158	6598	2786	7408	5914
224.13802 Da 828.15 s	13.8	225.145			6742	4038	5276	3126	6416	2826	4344	3516	5996	5676	5256	3590	5002	5540	7052	4642	6368	5196	3916	4704	5326	2408	4804	4228
376.22059 Da 828.40 s	13.81	377.228			0	0	0	0	1524	2662	3220	0	4868	5704	2002	5722	4112	7172	6884	5886	6318	1886	6158	0	4412	0	3834	0
198.16059 Da 826.76 s	13.78	199.168			3324	1986	2508	2620	3840	2008	3314	2958	2838	3074	1784	1924	3328	2630	3866	3016	3262	4134	2460	3604	2602	1640	3530	3006
278.18525 Da 829.42 s	13.82	279.193			9772	6074	8380	7270	8978	4804	6872	7650	7600	8542	6364	5648	10258	7946	10628	7118	9280	8254	6116	8046	8276	3638	11022	8666
413.22719 Da 831.03 s	13.85	414.234			7924	9284	2702	7602	3458	6812	8156	10052	3954	10522	4860	7588	6058	17770	8998	8450	34098	16028	2654	12704	0	7784	4006	21800
222.15877 Da 829.91 s	13.83	223.166	3-Nor-3-Oxopanasinsan-6-Ol	C14H22O2	8674	4858	7468	4058	7238	4880	5160	6568	7286	7700	7012	4868	7302	7874	9852	6826	8462	6892	5216	6474	7014	3460	7890	7244
391.24384 Da 830.66 s	13.84	392.251			5062	5502	1270	3854	1774	4536	6662	7684	2820	7522	2508	3072	4184	10962	6370	4766	20018	10896	1378	9494	1690	4860	2672	14468
290.11141 Da 831.78 s	13.86	291.119	dehydrocurvularin	C16H18O5	1196	10294	766	31476	1028	6272	432	16172	1398	16388	652	53376	746	20952	1192	37474	5566	105162	996	14904	1074	41876	662	8168
378.14270 Da 832.26 s	13.87	379.15			32092	17884	26432	25394	29446	21936	18432	27200	18448	43354	9274	15494	19246	34896	25442	20530	21748	19952	11188	25244	20768	11956	23166	25720
320.19473 Da 832.77 s	13.88	321.202			2302	1550	0	1740	2086	2684	2576	2592	4350	3476	6634	5834	4158	4336	4130	4116	4562	2420	1904	3058	2342	3088	2826	3674
264.16906 Da 831.76 s	13.86	265.176			12878	7774	11688	6690	12718	7898	9382	10596	11666	12428	8586	7392	10650	10542	12782	10282	11956	10918	8850	11568	9834	7028	10798	11470
234.17160 Da 832.02 s	13.87	235.179	LID_235.1805_10.1	C14H22N2O	466292	206668	265602	284754	287044	0	249070	120636	0	0	525920	0	438896	0	380078	111892	317550	42586	0	0	488644	95008	376166	318718
364.16326 Da 833.60 s	13.89	365.171			3548	2752	3308	2800	3362	3528	3294	3114	2284	5088	1528	1878	2478	4228	4124	2258	3386	0	1804	3120	2662	1504	3390	3210
296.08300 Da 835.20 s	13.92	297.09			20632	13956	23034	9910	15088	10860	16010	23188	17668	15634	11768	8134	22354	13720	16868	16592	19352	15816	10258	16600	18938	8722	16800	19704
308.12185 Da 833.63 s	13.89	309.129			5782	3068	4902	2390	5134	2918	5278	3812	5302	4546	2870	2214	4924	4210	4330	5598	5096	5422	3310	5166	3854	1980	4926	5064
268.16362 Da 835.39 s	13.92	269.171	3-_4-methyl-1-_2-methylpropanoyl_-3-oxocyclohexyl_butanoic acid	C15H24O4	105596	75570	107584	65018	68660	63670	79582	90310	91894	95276	57274	55174	65520	92244	108388	75002	112104	103130	51762	92684	79300	63454	81354	102532
180.15005 Da 834.80 s	13.91	181.157			5144	2538	3030	2354	3532	2086	3876	3440	3342	4084	2016	2598	2702	3118	3120	4278	4402	3790	3020	3742	3248	2238	3590	4542
342.28552 Da 834.97 s	13.92	343.294	CocamidopropylBetaine	C19H38N2O3	19362	8462	10888	10608	7658	6296	11746	14834	9042	8538	5738	12988	16028	7288	8952	11128	11940	12152	9958	13750	9042	6322	7238	10314
220.14321 Da 834.95 s	13.92	221.15	2,6-Di-tert-butyl-1,4-benzoquinone	C14H20O2	12582	7380	9692	6620	10822	5136	7856	9502	9582	9348	7350	5488	10246	9284	10004	9940	12104	10702	7966	10022	9536	5078	10074	9966
220.10739 Da 836.24 s	13.94	221.115			13588	10370	5360	9148	7588	9784	5860	13486	5328	22058	3510	10174	8790	17890	6546	6144	20758	11572	4054	12792	7168	12984	9372	18228
314.14771 Da 837.51 s	13.96	315.155	NCGC00384799-01_C19H22O4_2_R,3R,4a_S,5R,8a_S_-5-_3-Furyl_-2_,5_-dimethyl-4_,4a_,8_,8a_-tetrahydro-2_H-spiro_furan-3,1_-naphthalene_-4,7_3_H,5H_-dione	C19H22O4	13156	6442	9608	6838	8926	8638	9896	8282	10042	17632	6970	2424	9960	8698	9908	6050	13254	3162	5366	12788	9462	3090	10144	6740
274.10134 Da 834.90 s	13.91	275.109			10556	6468	8766	4046	8942	5394	9616	10838	7898	7586	3352	3336	9434	6812	8650	8002	10278	10122	5140	8880	8826	4794	8318	11572
228.17102 Da 835.49 s	13.92	229.178			6694	5588	4234	3824	3756	4216	6474	7414	6474	6746	2600	2998	4144	6008	5990	5502	6462	7274	3470	6410	4388	5154	5916	8042
398.18154 Da 835.60 s	13.93	399.189			0	0	0	0	820	2610	0	3416	1890	1650	3058	0	0	3138	0	2562	2896	0	2008	2160	3030	3030	3732	7868
196.14364 Da 837.26 s	13.95	197.151			12628	10744	14032	8334	10346	8882	12308	12920	11998	10574	11012	8644	15064	11164	16454	11626	13450	13370	10350	13816	13474	6794	11732	13698
199.19225 Da 838.16 s	13.97	200.2			4346	8040	6480	4968	4780	5884	8272	6906	5536	3428	0	0	10558	4168	5070	5390	4220	3690	0	6598	7172	4878	6376	5536
266.18454 Da 838.48 s	13.97	267.192			5668	4838	5504	4186	6940	4354	6004	6240	6310	6844	3650	9544	7072	6208	8058	6142	6538	7642	5654	6930	6120	4500	7370	7072
260.17466 Da 839.09 s	13.98	261.182	falcarindiol	C17H24O2	5254	4956	3906	3794	4236	2828	2248	4484	3892	4030	2302	2834	2510	4366	2772	3444	4986	1628	3432	4408	3570	3024	4770	5946
300.16839 Da 840.53 s	14.01	301.176			175154	163870	229134	108094	131432	77820	146258	166058	127634	161920	123528	166186	158850	165392	186240	140302	158590	258402	135848	154782	124822	92368	157310	135940
176.13836 Da 839.18 s	13.99	159.137			11360	11052	9938	9008	13302	8764	15744	14676	11550	17868	5988	10370	15498	15544	12796	13038	13220	16188	10286	13302	11468	7874	12178	13276
412.27879 Da 841.98 s	14.03	413.286			5060	5886	5278	10344	8788	8372	3090	10240	5628	10044	4400	16054	4918	11920	8800	7800	8800	5782	5188	11630	6256	8006	9200	13854
202.09358 Da 839.30 s	13.99	203.101			50056	31288	50078	30310	49498	28906	41868	35560	38358	52018	31880	32588	47806	48522	50826	40698	50968	38810	35780	42828	36724	14404	46926	42700
336.22593 Da 840.89 s	14.01	337.233			4592	3912	4424	4258	4236	4364	4062	4786	5336	5976	4112	6530	4488	5994	5144	5398	5722	6766	4656	5910	5510	5430	6062	4940
410.26261 Da 840.82 s	14.01	411.27			4510	4148	4090	6668	5832	4816	3582	5852	3374	7518	3718	7598	3856	6584	6734	4958	5148	4300	3076	4802	4460	5100	5908	5076
240.16863 Da 840.74 s	14.01	241.176			79142	66062	83112	51212	80016	58124	71444	83250	77202	97418	71802	67082	76772	78048	86212	78016	94156	85894	69732	82330	73952	51364	79888	88952
330.17884 Da 839.41 s	13.99	331.186			16370	22344	10686	19658	12820	42768	9048	18402	11774	33022	10132	13158	14586	31708	15030	17952	29086	23440	4328	17270	8058	31126	17496	32288
262.15325 Da 841.33 s	14.02	263.161			3708	3028	0	2770	3262	3228	2570	3330	2818	4250	2790	5802	3004	3642	3932	3288	4254	4280	2322	3838	3344	4484	4320	3922
362.14718 Da 842.64 s	14.04	363.154			1418	1890	1358	1644	1914	1430	1238	2130	1264	2504	866	1302	1606	2390	2096	1320	1244	1524	804	1628	1152	1102	1434	1480
276.17014 Da 843.92 s	14.07	299.16	shogaol	C17H24O3	228068	124412	159668	239970	187638	221300	144956	282650	167156	426944	106770	128040	198914	391040	195024	147204	249316	151980	96750	197908	152330	154284	255386	214270
366.14031 Da 844.22 s	14.07	367.148			3514	1832	2762	2954	2564	2422	1850	2922	2296	5294	1464	1252	2914	4712	2932	1622	4130	2024	1256	2650	2038	1666	3144	2848
160.08769 Da 844.20 s	14.07	161.095			33496	26874	22764	49228	28010	47428	33020	50710	22380	72684	14378	24182	35628	58452	30576	25058	36594	28118	16394	33144	24106	42304	33104	34154
252.15359 Da 843.89 s	14.06	253.161			4316	3586	2528	1962	2334	2576	1856	2914	2474	3092	1790	1502	1602	3848	2410	2028	2804	0	2278	3134	2668	2716	2916	3914
366.23635 Da 844.14 s	14.07	367.244			6324	5280	5174	12004	6996	6800	6806	19044	6162	13094	5726	8904	7452	23858	8718	7920	7564	9300	4930	11526	9390	7876	10868	13886
439.26749 Da 846.45 s	14.11	440.274	LPC 12:0	C20H42NO7P	244	0	0	3212	0	0	0	0	0	1306	0	49986	0	6462	0	4466	0	19146	0	0	0	8114	0	0
370.18724 Da 845.80 s	14.1	371.195			3826	2662	2024	3886	6806	8048	7248	12180	10652	14546	9172	9524	6736	15596	12712	8392	15294	4202	11724	12310	14712	9526	25392	16956
430.28876 Da 844.65 s	14.08	431.296			4902	3192	4320	2698	3540	2534	4242	3332	4286	4768	3176	2134	4532	4252	4592	2914	4482	3778	2372	3342	3430	1674	5020	4646
348.22615 Da 844.77 s	14.08	349.233			1420	1176	1362	2466	1416	1478	1696	1552	1448	1772	1286	1538	1628	1756	2132	1012	1652	1144	1126	1688	1394	0	1748	1426
274.13510 Da 847.31 s	14.12	275.142			6834	4036	3342	2652	4106	3258	1776	2964	2816	3390	1606	2066	1748	4220	2636	2044	4172	0	2390	4188	3082	2536	3772	5358
334.21079 Da 847.57 s	14.13	335.218	_E_-5-_1S,8aS_-5,5,8a-trimethyl-2-methylidene-3,4,4a,6,7,8-hexahydro-1H-naphthalen-1-yl_-3-_hydroxymethyl_-2-oxopent-3-enoic acid	C20H30O4	5796	3912	0	31492	13344	75472	33442	29838	81906	67274	60128	231650	54226	141986	89578	96410	127854	18324	46970	97568	67044	106092	85148	111966
256.15255 Da 848.95 s	14.15	257.16			14922	5380	11592	18794	12690	14466	9746	0	13504	15814	15792	4348	10126	6164	11378	4430	13720	0	12294	0	11904	15198	9092	18248
348.13194 Da 848.04 s	14.13	349.139			2056	1388	1396	1580	1710	1322	1538	2192	1316	2888	1200	972	1282	2112	2074	1398	1504	1288	1198	1426	1306	722	2172	1958
346.27015 Da 849.57 s	14.16	369.26			22776	26166	20032	36170	29692	26992	15728	35932	16576	55808	13590	24154	10870	49854	28118	19866	22546	24632	11840	36332	21366	17794	27254	31166
392.16997 Da 848.60 s	14.14	393.177			15818	11784	11662	13192	16012	11696	11452	13828	10622	25890	7848	7856	6746	19586	16036	11054	11910	11024	7482	15694	11712	4198	15642	15968
296.23131 Da 849.17 s	14.15	297.239			1562	1234	0	0	1260	1534	1354	0	1486	1830	1014	0	1608	1668	1802	1692	2328	1632	954	0	0	0	1530	2040
300.13194 Da 851.39 s	14.19	301.139			3024	0	3166	30458	134328	571662	272422	316098	497714	535390	374080	1214058	460168	1199066	677130	997824	844948	370936	480554	687462	359036	498830	639998	599484
578.28339 Da 851.24 s	14.19	579.29			0	0	0	0	1346	26926	7336	9572	14142	19310	9266	159564	15076	89520	26642	69930	42758	13464	18250	30828	11820	37388	26548	29710
166.02528 Da 851.43 s	14.19	149.022	Phthalic acid	C8H6O4	0	9922	0	6914	12898	76028	36882	48486	46930	70782	36090	175742	56676	132808	68336	109138	81332	51420	56124	75056	48892	92980	70932	68272
318.14226 Da 851.26 s	14.19	319.15			0	0	0	0	1006	3506	2182	1322	3540	3616	0	5374	2972	6686	3410	4276	4532	1696	2856	2924	2238	2310	3484	3726
493.27593 Da 853.82 s	14.23	494.283			0	1060	0	6364	0	398	282	1442	0	1832	0	5210	0	2390	0	2892	544	5066	0	1214	0	3262	0	532
420.16589 Da 851.63 s	14.19	421.173			5266	5720	4812	6210	6304	4546	3242	5246	3338	11218	0	4162	2876	8854	5046	3822	4540	4276	2596	5578	2840	3196	6184	4650
431.30001 Da 852.31 s	14.21	432.307			0	1240	0	7326	0	750	0	2216	0	2700	0	13386	0	4104	216	4684	0	6700	0	1414	0	4274	0	0
270.15825 Da 852.94 s	14.22	271.166			1902	1772	1934	2764	1876	1768	1190	1932	1500	2658	990	1554	1746	2084	1538	1728	2052	1664	930	1444	1538	1998	2042	1378
246.15903 Da 851.30 s	14.19	247.166			2616	1894	2226	1926	2968	1576	2356	2164	2160	2172	1372	0	1992	2152	2328	2322	2578	0	1794	2042	1832	0	2224	1866
287.24472 Da 853.37 s	14.22	310.234	Lauryl diethanolamide	C16H33NO3	25904	20212	22202	5134	4078	2482	19626	25058	20718	19346	7078	13266	18492	54980	2284	2602	24060	54588	10416	33152	17962	9510	20144	24922
449.31229 Da 853.56 s	14.23	472.301	Glycochenodeoxycholate	C26H43NO5	504	3558	314	26202	412	1460	296	4732	598	6630	438	33458	0	11514	496	10498	1026	17876	0	3858	378	15278	0	1262
320.13706 Da 853.47 s	14.22	321.144			5624	5940	3468	7704	5860	9152	2492	7052	3100	11884	2116	6970	3564	8534	3864	4970	5384	3996	1534	5370	3438	4956	3948	5448
392.25192 Da 851.93 s	14.2	393.259			9446	10624	6918	16578	8936	7864	4590	12008	6582	20138	4834	11880	4268	18704	8778	7394	9622	10230	4050	11150	5816	10054	10986	10242
234.17161 Da 854.08 s	14.23	235.179	LID_235.1805_10.1	C14H22N2O	393122	173990	229044	0	262070	0	0	91548	0	640016	390912	0	329840	198174	275534	99264	0	0	0	0	400702	80554	325526	249802
334.15324 Da 855.09 s	14.25	335.161			2136	1882	1458	2936	1802	1974	1094	1672	1168	3766	580	1432	1112	2544	1268	1074	1442	1498	538	1846	1180	1312	1360	1654
282.17909 Da 855.15 s	14.25	283.186			8218	6522	7002	9098	7114	7632	5104	9818	5132	9904	3974	4732	6200	9038	6846	6476	7544	6870	3506	8474	6418	3342	5688	7432
280.20036 Da 855.62 s	14.26	281.208			4722	2770	4108	2168	4436	2878	3308	4186	3880	3954	2596	2566	4044	3798	3724	3384	4570	4324	2784	3746	3346	2002	4486	4576
338.24224 Da 859.93 s	14.33	339.249			3400	1962	2332	3330	6732	21098	14160	47612	22334	24844	17274	41240	13686	32050	22322	26080	25708	11326	24480	27616	35428	29880	51050	44600
228.10886 Da 858.32 s	14.31	229.116			2262	1176	2224	1476	1650	1150	1084	1364	1754	1594	862	5182	1492	2604	1396	1720	2178	4170	1292	1698	1678	5080	1634	1680
288.14509 Da 858.44 s	14.31	289.152	_3,6,9-trimethylidene-2-oxo-3a,4,5,6a,7,8,9a,9b-octahydroazuleno_4,5-b_furan-8-yl_ acetate	C17H20O4	16166	7206	13610	6026	11104	8048	9280	8364	11308	14726	9302	8022	12460	12240	16522	11942	13272	11512	10500	11480	11648	5464	13612	13518
334.11640 Da 860.91 s	14.35	335.124			40098	33258	45874	25316	30960	30010	36770	39246	40834	44474	29126	27784	53406	37290	42208	38896	47152	33910	29838	48114	46172	32384	39034	40820
199.19213 Da 863.30 s	14.39	200.199			4240	6142	3742	2852	3070	3252	6290	11100	2328	10154	2384	3712	3914	8722	2342	3364	5534	4594	0	9090	3412	3570	4196	6298
290.22067 Da 861.53 s	14.36	291.228			3114	2848	3048	2310	2804	2598	2684	3364	2826	3808	1782	1780	4416	3488	2792	3868	3144	2258	2096	4186	3156	2340	2426	2900
352.08320 Da 861.20 s	14.35	353.09			8764	3884	7074	2940	6826	4018	3974	3380	5668	6156	5572	4888	6072	6450	8108	6620	7344	5702	5346	6416	4492	1902	5456	5810
382.19512 Da 863.27 s	14.39	383.202			19572	9662	16050	6932	15276	10572	13100	16614	14004	16966	12938	11856	13678	17420	18092	16078	19734	20268	13278	14760	12472	9122	13534	18058
354.19539 Da 864.12 s	14.4	355.203			2206	2036	1130	1444	1702	1868	1244	2884	1378	4218	0	1594	1274	3714	1676	1900	1490	1686	866	2688	1500	1546	1816	2112
172.14498 Da 861.21 s	14.35	173.152			6242	3986	3566	2466	5632	3906	5706	6436	5212	8022	3414	6248	6020	6448	5616	7274	5884	10482	3974	5946	3788	5366	4542	6208
306.21363 Da 869.49 s	14.49	305.206			11954	14506	14914	1368	13394	2902	1874	17594	1232	10880	12124	18288	14114	13508	13794	17602	14208	20822	12870	2036	1330	16462	6018	17496
300.13207 Da 865.25 s	14.42	301.139	NCGC00380262-01_2,3,5,7-tetramethoxy-9,10-dihydrophenanthrene _IIN-based: Match_	C18H20O4	120644	82806	123598	66154	86186	97144	89336	121720	118492	158224	92210	0	112708	0	124564	0	150718	140910	86118	0	108262	0	130686	129670
376.17617 Da 863.91 s	14.4	377.183			3846	2558	0	3316	2598	3706	1530	4652	2086	7518	1488	3672	1924	6072	0	2346	2906	3746	1166	3678	2158	2204	3308	4620
254.18465 Da 866.49 s	14.44	255.192			8962	6664	8968	5174	6482	6354	6940	8430	8472	9854	7680	7888	6980	8082	9534	8662	11038	9700	6872	7460	8470	3494	9688	8806
292.19993 Da 867.31 s	14.46	293.207	NCGC00385795-01_C18H28O3_2H-Pyran-2-one, tetrahydro-4-hydroxy-6-_2-_1,2,4a,5,6,7,8,8a-octahydro-2-methyl-1-naphthalenyl_ethyl_-	C18H28O3	51022	30084	41046	26674	35734	30012	35146	38034	33620	61974	29672	32260	37626	42012	56748	42660	38484	39902	29968	50816	35624	16478	49568	43958
252.20580 Da 867.55 s	14.46	253.213			5684	4360	4292	3222	6052	4302	4534	0	4192	7726	2898	4558	4748	4658	6524	5892	4702	5520	3970	6854	4476	0	5252	5184
250.18970 Da 868.63 s	14.48	251.197			4034	2900	4020	2644	4706	3586	3930	4194	3778	5204	3392	3060	4500	4538	4876	3734	4188	4548	3600	3720	0	0	4086	4882
294.21635 Da 872.63 s	14.54	295.223			29388	21298	24766	18162	31816	20674	24984	27856	27202	28000	14880	30648	25290	33654	37718	25182	28642	30902	18416	36248	23668	19808	33176	33498
398.24085 Da 870.90 s	14.51	421.231	Tri_butoxyethyl_phosphate	C18H39O7P	7342	7438	6978	6604	6496	4606	5232	6600	14400	10300	5336	8690	5882	9168	6154	6104	8152	7232	6580	8984	10648	3222	42150	6142
254.22295 Da 872.10 s	14.53	255.23			2248	1730	1436	1466	2366	1808	2370	2630	2034	2470	958	2208	2306	2320	2862	2366	1812	2352	1132	2460	1754	1700	2480	2134
336.16829 Da 870.16 s	14.5	337.176			15582	5004	7654	5202	18926	17680	2564	0	4024	4150	4362	3148	4064	3796	5636	0	8776	1702	12146	9580	7846	1684	8124	6856
236.21241 Da 871.86 s	14.53	237.22			2080	1580	1588	1472	2442	1690	2298	3002	2018	2832	1214	1824	2046	2140	2408	2042	2028	2792	1518	2680	2318	2700	2280	2646
318.21563 Da 872.73 s	14.55	319.223			10694	6948	5158	149344	13096	5536	7522	13816	8452	12498	6256	16592	5798	13024	7812	7172	5928	11754	3536	7804	7370	15234	6274	8018
312.16739 Da 875.30 s	14.59	313.175			1702	1858	1456	1828	1602	1544	1150	2480	1610	848	1244	2630	1524	2204	1852	1524	1342	3242	1062	2064	1536	2038	1684	1962
274.21275 Da 876.60 s	14.61	297.202			644714	623932	578488	1024444	649118	597900	450942	1519546	506322	1186600	305324	541804	505820	1635630	751448	615434	467976	691082	243864	767412	496768	469936	839452	571880
354.15312 Da 876.65 s	14.61	355.16			2788	1788	1678	3174	1654	1978	1702	6380	1436	4102	762	1062	1754	5092	2996	1988	1188	2016	704	2296	1760	1082	2876	1842
358.16510 Da 875.73 s	14.6	359.172			1582	2072	1802	2732	1728	2114	2160	4816	1480	3516	764	1046	1830	2874	2068	1798	1356	2502	872	1818	1578	1374	2318	1976
364.18264 Da 876.28 s	14.6	365.19			4304	4872	3750	9526	4596	4340	2474	14818	3750	9866	3126	3162	3854	17618	6362	4690	2774	5884	1428	6146	3616	2748	5738	5268
314.18358 Da 879.08 s	14.65	315.191	1,4a-dimethyl-9-oxo-7-propan-2-yl-3,4,10,10a-tetrahydro-2H-phenanthrene-1-carboxylic acid	C20H26O3	25078	27454	16488	36030	17022	28368	12246	28644	12588	52616	12512	51200	18438	42566	15694	14350	17556	20010	10590	15812	17268	32014	20866	20224
338.20261 Da 873.79 s	14.56	337.195	Piperonyl butoxide	C19H30O5	9636	11866	9970	0	9830	10688	0	11940	1316	7950	9340	13274	18216	7590	9982	10856	13706	12672	10676	7942	0	10086	1446	0
272.17310 Da 882.90 s	14.71	273.18	Galaxolidone	C18H24O2	7066	4406	5662	4152	4962	0	6042	6228	4530	10640	3766	6510	5642	7238	5416	4816	8786	5606	3916	4904	4608	5112	6512	6774
306.21563 Da 883.82 s	14.73	307.223			3926	3652	3684	2516	3218	1988	3150	3418	2560	4560	2182	3066	3584	3144	3194	2456	3242	3184	2524	3258	3692	2144	2900	3760
374.30124 Da 884.61 s	14.74	397.29			23132	42922	10494	111166	38790	28070	5908	115688	6330	67852	7002	71312	7982	173506	22846	48076	11396	71518	6072	61022	10696	51972	38816	41348
372.28573 Da 885.39 s	14.76	395.275			0	39482	7586	78494	18116	16794	8706	146942	6468	44710	6036	42896	20160	229974	6442	16508	9952	36560	4880	76406	9086	32022	36916	34892
467.29918 Da 887.17 s	14.79	468.306	LPC 14:0	C22H46NO7P	0	0	234	39776	206	0	0	8978	310	2486	388	136412	446	43102	0	2914	0	27236	316	1446	486	125452	0	1026
264.20505 Da 889.30 s	14.82	265.212			2928	1826	2898	1622	2810	1796	1908	2030	2102	3048	1818	1460	2740	2458	1756	2614	3308	2058	1676	2224	2192	1280	2988	3144
563.29679 Da 889.92 s	14.83	564.304			0	644	0	7050	0	136	0	1476	0	634	324	40808	0	6544	0	1138	0	8494	0	0	0	27658	0	0
422.32256 Da 892.82 s	14.88	445.312			51964	34736	31802	38054	56630	30432	38276	57634	42970	69326	23304	35084	42006	78450	34782	42538	47176	32636	21960	42876	37748	26186	53728	52160
378.29634 Da 892.51 s	14.88	401.286			44738	29458	30012	29630	43318	27452	33582	44658	32514	62124	19238	29684	39428	64728	28936	37178	46558	30038	16500	37950	30850	21534	44276	43348
334.27022 Da 892.49 s	14.87	357.259			21096	18148	14944	19448	21556	20252	18636	24228	21138	40448	11220	22520	19762	31400	15814	20416	22704	17814	10034	22074	17030	15626	24458	26886
466.34877 Da 892.53 s	14.88	489.338			22362	15548	14824	16494	22906	10562	14524	25724	17706	27146	9894	16416	17044	32702	14144	19230	17060	16234	8632	17058	17128	10548	24210	22656
320.23115 Da 890.60 s	14.84	321.238	NCGC00180747-02_5-_1S,2R,4aR_-1,2,4a,5-tetramethyl-7-oxo-3,4,8,8a-tetrahydro-2H-naphthalen-1-yl_-3-methylpentanoic acid	C20H32O3	11070	11788	7864	13444	9670	7030	6300	13806	7630	18072	5058	21206	9072	15490	6384	8780	7652	13728	5034	20674	7590	15830	9734	13652
312.22619 Da 892.51 s	14.88	313.233	_9Z,12E_-15,16-dihydroxyoctadeca-9,12-dienoic acid	C18H32O4	37360	30118	24226	32868	35594	35788	27382	45238	28084	67196	16218	39244	31710	50418	21794	32540	40632	35246	15152	34742	26434	30034	37466	43234
342.21412 Da 891.21 s	14.85	343.221			2158	1908	1326	0	2234	1556	1490	2010	1150	3364	1120	4984	1412	0	0	1548	1204	3178	1020	3014	1158	9242	1690	2004
404.25207 Da 890.39 s	14.84	405.259			9412	8024	9260	9760	10634	2110	1876	1888	2246	11606	1610	2174	2230	2998	1422	0	2486	2562	1686	2418	2014	1344	3766	2616
268.20016 Da 890.63 s	14.84	269.207			21308	12316	15138	13618	18138	17166	12942	16230	15852	32390	12274	18752	16016	22302	14000	17528	16960	16888	11600	16374	13488	13210	16564	20086
532.35683 Da 891.73 s	14.86	533.364			12832	8674	8212	10412	13114	6276	7112	13428	11376	14764	5306	8058	9482	19774	8572	10064	10158	9504	4482	11038	8248	5988	13376	12798
308.23107 Da 890.53 s	14.84	309.238			2408	2126	2034	2054	2264	1972	1638	2156	1656	2984	1274	1580	2018	2654	1594	2240	2312	1920	1266	1762	1762	1404	1994	2390
266.22079 Da 896.35 s	14.94	267.228			9494	7178	5272	7500	8144	20164	5522	9388	7790	32072	3786	9712	6370	15808	6326	7376	15406	6590	2642	9536	4886	8356	11580	12634
328.19944 Da 897.03 s	14.95	329.207			3994	7958	2188	14864	3438	16242	2520	9798	2330	16884	2036	12994	3022	14084	2114	3514	3428	3904	2102	3428	2792	11874	4394	4808
493.31481 Da 900.71 s	15.01	494.322	PC 16:1e	C24H48NO7P	3098	5924	0	55736	0	1114	0	14536	0	4870	0	149786	0	30964	1028	5670	0	29884	0	1384	624	133722	0	1426
308.19496 Da 899.62 s	14.99	309.202	albocycline	C18H28O4	42288	31490	31196	28092	40886	26616	38274	43878	40356	33790	28104	20772	43000	42934	45498	35562	45114	32054	31984	38804	41176	21446	39476	40672
234.17168 Da 906.46 s	15.11	235.179	LID_235.1805_10.1	C14H22N2O	249492	130380	147030	144628	163598	0	0	57870	0	368830	308998	0	231352	128602	195324	0	166330	0	312352	0	259460	0	195262	164708
312.12749 Da 909.47 s	15.16	313.135			7878	5118	5434	2968	6164	4584	3240	4214	4776	7460	3890	4250	4592	5990	7200	6024	8994	9666	3040	8122	3920	1652	6264	8986
322.24660 Da 911.39 s	15.19	323.254	_1R,4aS,5R,8aS_-5-_5-hydroxy-3-methylpentyl_-1,4a-dimethyl-6-methylidene-3,4,5,7,8,8a-hexahydro-2H-naphthalene-1-carboxylic acid	C20H34O3	5404	8568	3298	5378	4900	5684	2984	10274	3004	9226	2380	5840	3238	10546	5196	5654	4492	7444	2176	7092	3284	2556	6184	9008
543.32977 Da 913.80 s	15.23	566.32	PC 20:4e	C28H50NO7P	282	1986	262	31516	0	0	0	4954	0	1220	0	353042	0	25402	398	2616	0	20080	746	770	0	148826	0	500
286.18840 Da 913.57 s	15.23	287.196			3596	3130	3176	1648	2980	1766	2668	2872	3424	4008	2176	958	2788	3190	3054	2974	3878	2430	2776	2466	2112	0	2812	2576
519.33024 Da 916.27 s	15.27	542.32	PC 18:2e	C26H50NO7P	1096	4156	324	80220	716	1226	254	10950	318	5818	1170	609328	0	67292	598	11124	162	47606	1004	1252	222	303008	546	928
282.21540 Da 918.18 s	15.3	283.223			393834	250370	436300	237374	330370	249428	263716	390508	338712	399586	248626	131316	394666	326282	404592	346246	415654	267346	253754	343834	355580	144486	377844	371320
560.38828 Da 916.82 s	15.28	561.396			2264	1434	1608	1898	1664	1156	708	2094	1174	2544	826	1670	1000	2728	2024	1754	1832	1238	772	1484	1210	0	1752	1764
516.38787 Da 917.52 s	15.29	517.395			2594	1538	2014	1748	1656	1362	1428	1212	2416	2440	2416	1000	2348	1576	2550	1214	2036	510	3354	2676	2166	1104	2202	1812
340.25705 Da 917.80 s	15.3	341.264			2490	1914	1970	2578	2216	3112	1856	2882	2144	3920	1400	2608	1806	2372	2276	2010	2522	1960	1736	2288	1644	1916	2394	2440
304.25927 Da 919.35 s	15.32	327.249			164226	115838	173142	91934	146966	103972	133360	157218	148894	120702	131880	73276	159600	116830	154634	134164	168302	102612	111444	135892	162836	79066	151460	142366
106.06212 Da 919.04 s	15.32	107.069			8774	6218	7864	4316	6604	6204	9238	9902	8510	10470	4082	2756	8676	5600	8084	8464	7526	6450	5216	8654	7816	3966	7786	7168
348.28585 Da 918.83 s	15.31	349.293			4334	3230	3138	2192	3296	3158	3324	4264	3088	4610	1818	1884	0	2954	3306	3436	3378	3272	2264	3442	3516	1940	3664	3364
330.21486 Da 918.47 s	15.31	331.222			3266	2550	2818	4596	2894	3056	2380	4312	3092	8360	2302	2312	2408	6514	2916	3360	3008	2356	2260	2486	2816	1626	3324	2814
370.26775 Da 919.18 s	15.32	371.275			20470	12716	21832	9034	15834	11174	15868	15332	17444	17860	14752	7642	20612	12906	20944	15582	19578	14098	14908	17556	17688	8422	17608	19580
260.23354 Da 918.50 s	15.31	261.241			18608	13056	16294	10852	14566	12044	15968	20376	16078	18308	7764	4814	18628	12150	16220	17158	17232	13876	12250	17588	16084	7510	17810	16582
374.24131 Da 921.32 s	15.36	375.249			3234	2538	2494	10998	4034	3216	2188	9312	2126	17498	1944	6450	1862	20868	3078	4120	2720	2420	1578	3178	2416	2406	3740	3284
472.33571 Da 918.64 s	15.31	473.343			2608	2546	2272	2650	3162	2496	1584	0	2266	5154	1588	2098	2106	3680	3226	2676	2732	1766	1544	0	2456	1620	3284	3682
302.24389 Da 925.76 s	15.43	325.233	GLYCEROL-MYRISTATE	C17H34O4	276124	827614	65454	1035626	212790	286678	143092	2641700	75846	819978	40864	527086	440108	3133810	78858	258280	57858	489372	20920	1429046	97560	454546	910090	597322
234.17165 Da 927.94 s	15.47	235.179	LID_235.1805_10.1	C14H22N2O	0	119680	127262	148538	150440	0	132672	52206	0	297288	255010	0	214862	92786	178196	62318	140842	31156	251098	0	222208	48448	177616	142922
636.29594 Da 930.64 s	15.51	659.285			1338	6992	422	32236	988	3206	1670	56186	776	14928	0	38988	3014	164964	370	4510	590	5280	174	57704	678	26240	4734	14448
272.13706 Da 931.16 s	15.52	273.144			2314	1572	1272	608	2546	1082	1126	754	1686	2712	824	478	1118	1342	2206	1482	2602	1572	934	1484	1076	356	1642	2028
277.23689 Da 932.91 s	15.55	278.244			2556	2952	3474	2132	1902	1820	2276	3118	2538	1804	1698	654	5750	3240	2390	2330	2206	1606	1038	1844	2786	1396	2008	1894
384.28338 Da 930.58 s	15.51	385.291			4400	0	3592	2562	4140	3084	3096	2848	2880	3834	2816	0	2346	3382	3708	3766	4196	2846	3084	3286	2572	0	3362	3182
255.25468 Da 932.81 s	15.55	256.262			1714	2834	2384	2744	1634	1614	2146	4272	1878	1396	1024	518	4514	1386	1356	1568	1476	1150	794	2116	2422	1704	2242	1840
495.33010 Da 937.48 s	15.62	496.337	LPC 16:0	C24H50NO7P	1298	14672	0	84578	432	1470	710	106724	412	6644	674	185812	1602	260082	0	1160	334	10314	0	15076	434	195428	1442	0
157.95575 Da 940.29 s	15.67	158.963			27266	13122	28418	12296	24880	13564	13332	0	22838	0	25844	10018	19972	19584	26202	20254	28078	14554	21138	19150	20052	7148	19058	22048
225.94277 Da 940.44 s	15.67	226.95			25534	12030	26702	12632	25422	12276	11400	11078	21854	0	23206	8324	19582	17160	27966	17658	26782	14750	19764	17476	17170	0	19714	19610
287.91320 Da 941.93 s	15.7	288.92			4998	3318	4924	3022	4162	2686	3844	3664	4468	0	2402	1802	5280	3126	4608	3846	4878	4034	3218	3388	5006	0	4234	4178
560.38887 Da 944.53 s	15.74	561.396			2164	1178	1272	2632	2962	2486	600	2302	1762	3418	0	1962	1016	2092	1626	1312	1402	2284	954	1676	1080	1810	1304	1546
352.25723 Da 947.01 s	15.78	353.264			22756	33804	69262	49048	382846	137572	46286	178272	32862	31882	57234	5054	17176	43832	27008	83010	34612	19678	43600	21504	318314	13326	59518	31190
472.33554 Da 947.15 s	15.79	473.343			2662	1708	1698	2892	3714	4274	0	3360	1864	4470	1106	2282	1422	2254	2024	1762	1872	2614	1338	2062	1364	1690	1538	2058
424.27824 Da 950.63 s	15.84	425.286			48784	27106	48766	23802	42804	21192	31086	37554	34800	41088	33336	24268	39204	35924	45994	34904	45808	38282	30956	35158	36198	19110	31384	37730
322.18882 Da 952.11 s	15.87	323.196			8648	34562	3762	4852	5060	8020	4146	5018	2282	8026	2102	2220	2856	12230	7134	3858	4572	9396	2674	8648	5264	2128	3240	15170
287.91323 Da 958.12 s	15.97	288.921			4532	2942	4446	3064	3710	0	3450	3874	3876	4836	2194	1508	4458	2660	5178	4782	4404	3680	2930	3856	4150	1544	3552	4598
234.17161 Da 960.39 s	16.01	235.179	LID_235.1805_10.1	C14H22N2O	204206	108440	114026	144452	139932	0	0	56962	0	0	243344	0	0	89880	167396	56606	129528	0	275458	0	195422	0	160186	132222
225.94266 Da 962.18 s	16.04	226.95			21476	12244	22646	12692	23814	12550	11738	10156	0	20934	20954	8852	13286	16376	25780	19912	24856	0	20446	12528	16036	6244	20378	18698
157.95562 Da 963.53 s	16.06	158.963			25106	11838	25696	13772	23750	13408	13000	12200	0	21594	22252	10978	12372	16076	24132	19048	26822	14706	21472	16548	20630	8372	20266	19692
328.23471 Da 967.40 s	16.12	329.242			5076	3184	3972	3922	3454	6184	4108	3700	3212	9056	2784	5274	3162	3610	3580	3608	5800	5036	3438	3124	3736	3416	2222	5302
404.31184 Da 971.36 s	16.19	427.301			25834	52946	1782	86506	6864	7706	7296	344566	2532	55634	768	59806	57910	474356	3128	4934	3272	12852	0	220594	2466	36938	87382	27548
269.27037 Da 969.88 s	16.16	292.26			7792	4486	9852	5160	9414	5456	6514	5108	8766	9004	7212	4506	8658	5902	9700	8160	10286	8328	8308	5848	8566	3494	7352	8704
250.18969 Da 970.95 s	16.18	273.179			5978	4608	3264	3202	4298	4952	2864	5160	3772	5172	2326	13736	3978	9234	4384	8986	5252	11258	2504	5110	3908	8192	4680	7800
228.20738 Da 971.73 s	16.2	229.215			2534	2980	1320	2632	1590	2118	1462	8572	1420	3304	858	6784	0	11338	1832	2998	1532	5546	730	6766	994	4712	4622	4100
234.17160 Da 974.65 s	16.24	235.179	LID_235.1805_10.1	C14H22N2O	205952	109616	113008	150466	128512	0	0	0	0	308264	249118	36488	176370	111348	149838	0	134422	0	257822	173724	188530	52030	183866	132438
352.25717 Da 975.80 s	16.26	353.264			232766	432354	144886	421308	83224	0	0	1790844	0	0	11800	0	416478	0	23998	62984	26552	0	6456	0	33316	208002	919530	641834
225.94276 Da 980.04 s	16.33	226.95			18090	7428	22802	8784	18302	0	0	10834	0	0	19790	6322	12472	7672	23922	16418	23098	11776	18958	19656	15124	4024	13886	14322
330.27502 Da 988.51 s	16.48	353.264	NCGC00186665-03_2,3-dihydroxypropyl hexadecanoate	C19H38O4	1709776	2266858	177414	2649990	687016	830138	1015252	6709588	511616	3088564	112254	1749538	2803528	7990830	279446	377066	339414	909882	49200	6312946	330996	1379410	3668210	2800350
238.22810 Da 988.73 s	16.48	239.235			111992	209418	3266	189072	24244	57596	97000	508960	17072	279984	2082	108128	237648	559144	7406	10616	7290	61318	1262	301812	8350	113586	264528	235958
256.23870 Da 988.74 s	16.48	257.246			24826	52654	5054	44192	7214	15008	22532	111622	6988	59302	2246	23518	51236	127160	3282	6178	4310	15232	2062	63768	6440	26066	54682	54212
274.24926 Da 987.61 s	16.46	275.257			1678	2912	640	2858	596	1094	1628	6250	0	4312	276	1366	3416	8152	0	544	0	1024	0	3508	546	1724	3962	3152
682.53338 Da 988.52 s	16.48	683.541			495666	769602	12500	901000	111612	161634	248314	3106848	73608	1193356	4492	562204	1110230	4405012	32398	48210	34936	218988	1166	2492968	37352	456264	1584020	1044866
374.23960 Da 990.29 s	16.5	375.247			2520	2016	1070	2154	2212	1858	1672	2460	1510	2586	464	1382	2590	2700	1332	1446	1526	2308	632	3756	1366	1366	2316	2746
430.20138 Da 989.54 s	16.49	431.209			4142	3316	642	3138	1684	2538	4034	6116	1760	5104	260	1944	4488	3142	1308	1490	1112	3772	0	4682	1538	2394	4628	4318
283.28585 Da 995.37 s	16.59	284.293	Stearamide	C18H37NO	1666	3102	1688	2644	1034	1220	2962	2982	1752	2792	578	586	5972	0	1158	1304	1006	1548	680	2458	1172	1860	2618	3300
312.26468 Da 995.46 s	16.59	313.272			112206	768106	4918	345424	48004	0	0	1656308	0	0	3184	0	394032	4045846	10578	0	9832	0	2734	1768878	7784	631708	641564	0
352.25693 Da 996.56 s	16.61	353.264			663164	0	80594	0	418170	0	0	2630076	0	0	59714	0	1089492	5169922	121096	0	129764	0	0	0	89816	1279652	1697712	0
682.53330 Da 995.95 s	16.6	683.541			109366	375262	2794	245340	113748	0	0	980550	0	0	0	0	292844	2426242	7116	0	7770	0	0	0	4064	414582	486142	0
305.26752 Da 1003.05 s	16.72	306.275			1582	1246	2682	898	1778	1074	1702	0	2294	1212	1320	478	2550	0	1606	1602	1850	1112	1196	0	2808	1686	568	1378
157.95572 Da 1004.46 s	16.74	158.963			18198	6780	19090	0	18442	10072	10148	5754	17510	13158	16570	6428	12940	7888	23240	16538	21102	0	17650	0	13428	28822	11422	13516
225.94259 Da 1005.00 s	16.75	226.95			16652	6292	16100	0	18142	8006	9396	6408	16168	13466	15676	4552	11748	9988	22214	15844	21974	11856	14978	10146	11742	23168	12000	12742
234.17170 Da 1006.42 s	16.77	235.179	LID_235.1805_10.1	C14H22N2O	175944	90630	108602	145192	118204	138678	0	46718	0	291760	221454	36614	165326	97964	133104	51130	119090	25490	220814	154486	174944	90018	165164	129926
302.22062 Da 1013.82 s	16.9	303.228	Abietic acid	C20H30O2	12086	13672	0	65188	0	7716	0	40942	2748	12402	3350	1308576	0	109698	0	25212	4608	26530	3630	14650	0	698804	0	10286
356.29090 Da 1011.76 s	16.86	379.28	MAG	C21H40O4	32628	79418	1384	100474	5760	14284	17098	377984	5530	87870	994	106618	63192	623186	2346	7302	2762	21762	738	257048	2648	86702	118396	72430
157.95560 Da 1020.21 s	17	158.963			19234	7580	14858	7008	15396	8922	9824	4560	0	13362	14726	5456	12054	8006	19344	15600	19594	13418	15456	9152	10618	4716	10302	13702
234.17169 Da 1022.83 s	17.05	235.179	LID_235.1805_10.1	C14H22N2O	165968	95094	102702	127672	119808	130662	0	53204	0	240668	225270	0	156758	106416	132190	48728	119254	26078	220900	0	165042	57076	128416	109088
225.94253 Da 1023.13 s	17.05	226.95			16964	7404	13764	6314	15416	8168	9366	0	0	14672	13560	4410	10046	9600	19046	14058	19068	12970	14114	8764	9280	3688	11108	13384
344.29093 Da 1026.56 s	17.11	367.28			16006	28752	444	33758	3712	5984	8244	98640	2356	29378	576	12978	28116	162566	1238	1470	1434	4926	320	73234	940	8826	55314	28400
157.95570 Da 1034.28 s	17.24	158.963			17320	6344	15020	7472	16132	8196	10182	6080	0	14738	15338	4924	12150	9472	16772	16038	17770	13388	13558	0	10488	4346	12294	15264
225.94274 Da 1038.16 s	17.3	226.95			15180	5406	14834	6134	16282	7620	9392	6432	0	14316	13508	0	9098	8150	15486	13844	17962	0	12324	0	9666	3394	10340	12398
432.34326 Da 1048.39 s	17.47	455.332			30692	53904	568	69060	5134	4922	10922	126382	3146	59528	428	33504	62340	239944	2492	1738	2820	9382	326	126378	1836	22830	81208	30398
380.28844 Da 1050.06 s	17.5	381.296			185828	173624	5842	208020	64552	54732	98764	433588	40438	253622	4346	0	271454	0	19588	16208	18060	53884	2616	463216	24680	89116	446786	211946
278.22059 Da 1052.03 s	17.53	279.228	Linolenic acid	C18H30O2	74932	51828	61436	58664	67400	37772	50196	94950	59736	86382	41414	105894	53558	219156	69642	60010	75456	78192	44782	108096	51364	49720	85962	88824
256.23865 Da 1051.50 s	17.52	257.246			27626	46936	20444	44698	21506	21568	26920	104686	23048	46652	11318	57344	39834	146584	22784	19764	22588	29076	16568	99028	22802	38656	62052	48218
274.24926 Da 1052.36 s	17.54	275.257			1876	3430	1226	2472	1792	1862	2528	5006	1254	3040	1014	3416	2130	10290	1732	1270	1386	1668	1262	6090	1484	1978	3708	2832
305.26735 Da 1054.99 s	17.58	306.275			1900	1034	1814	1120	2014	982	1418	1184	1940	1864	1428	898	1706	2960	2236	1730	1910	1982	1602	1056	1552	946	1394	1868
283.28585 Da 1056.03 s	17.6	284.293			2476	2272	1874	2272	1726	1436	2256	5358	1638	3392	1500	1712	1774	10216	2472	1672	2502	2132	1368	4136	2344	1624	3454	3204
234.17152 Da 1058.53 s	17.64	235.179	LID_235.1805_10.1	C14H22N2O	159502	115392	98828	120358	115080	127900	102358	39780	0	246042	203962	0	156644	0	117678	47804	109942	25542	199872	0	163134	88870	118768	105182
358.30630 Da 1070.87 s	17.85	381.296	1-Monostearin	C21H42O4	773418	761518	42576	810246	409598	397478	461944	1818926	342226	996918	34258	896506	1108694	3006602	212280	159602	216550	396768	17408	1924160	185420	604804	1256728	837280
304.23606 Da 1072.14 s	17.87	305.243	14-_hydroxymethyl_-5,9-dimethyltetracyclo_11.2.1.0_,_.0_,_hexadecane-5-carbaldehyde	C20H32O2	8116	5778	18298	12584	10988	6636	5930	12302	12248	7582	13030	675000	3786	28298	17186	17204	15980	14950	12808	6526	13782	220392	4112	7496
266.25941 Da 1071.07 s	17.85	267.267			43498	43680	692	42004	9830	20438	34678	128410	8420	66756	354	46346	58516	144154	3028	2824	2716	16710	414	81018	3164	40018	63872	52232
426.28319 Da 1071.00 s	17.85	427.29			1760	2102	0	2478	1190	1176	1312	3538	966	1994	0	822	3068	9248	428	626	0	1224	0	2220	700	1430	2064	2096
442.25834 Da 1072.36 s	17.87	443.266			6990	8118	618	7524	4078	4830	5216	10792	3780	8388	438	2266	9694	9592	2238	1786	2212	6158	0	9838	2432	3662	9000	7798
380.28847 Da 1081.87 s	18.03	381.296			99120	217802	4176	142940	123932	0	0	1388386	0	0	15350	0	168046	1414788	128582	0	146004	0	0	0	34582	53416	0	351956
234.17169 Da 1085.68 s	18.09	235.179	LID_235.1805_10.1	C14H22N2O	149708	75396	96416	134308	109842	119026	0	35810	136542	239576	202118	0	139808	78458	123550	45298	102850	23476	0	119198	158346	58918	0	94708
335.31699 Da 1096.48 s	18.27	336.324			1614	2672	728	1492	568	748	1680	43428	374	3990	372	618	2756	51206	364	232	258	842	254	8526	590	798	9888	2142
234.17169 Da 1098.58 s	18.31	235.179	LID_235.1805_10.1	C14H22N2O	150294	79240	94630	123358	104446	124098	0	38126	0	209822	201592	28674	136414	69974	119226	45560	107052	23676	186284	0	0	58574	116428	86908
370.30687 Da 1111.31 s	18.52	393.296			16882	12116	19560	12562	13778	12958	12578	22634	15530	15972	11982	10016	14238	18594	18432	14818	17256	14256	11374	15236	17060	10848	14780	16252
234.17166 Da 1116.22 s	18.6	235.179	LID_235.1805_10.1	C14H22N2O	146974	71114	86616	108484	101592	122544	0	36798	131776	199810	189092	0	133006	91480	111786	44826	94278	23044	179406	0	155364	49732	114768	93166
234.17156 Da 1139.49 s	18.99	235.179	LID_235.1805_10.1	C14H22N2O	145330	74768	91468	114940	96446	116378	84192	35146	126882	188678	186300	0	124802	79362	113794	43694	98292	22206	168734	120822	143592	45240	114436	87428
306.25168 Da 1159.39 s	19.32	307.259			130672	62438	98270	96420	111380	65338	82118	227320	100566	141036	80874	90138	111830	408834	108724	91638	102274	101234	78672	261878	67092	51232	191336	142812
284.26990 Da 1159.23 s	19.32	285.277			24448	26404	17324	23004	16760	15468	18898	82502	16862	32840	9474	15178	32346	103496	16180	14196	16284	17770	10774	72444	14744	13568	48086	29324
302.28078 Da 1159.38 s	19.32	303.288			1652	1810	1042	1704	1014	876	1384	5208	806	2014	584	860	1826	6206	1140	1012	1038	944	672	3576	744	844	2592	1830
234.17158 Da 1172.02 s	19.53	235.179	LID_235.1805_10.1	C14H22N2O	123240	111396	85448	141810	99608	118680	0	35164	123562	177434	166716	30198	123944	78412	104782	44340	93986	23464	171284	0	143944	41156	106192	78856
337.33262 Da 1173.29 s	19.55	360.322	Erucamide	C22H43NO	102662	42344	35658	44604	35358	22842	90144	432110	18530	206942	24084	33242	79634	798634	21714	20326	14850	49536	14574	187202	25600	38528	190028	178712
674.66661 Da 1172.92 s	19.55	675.674			18386	47380	5596	9006	3964	1734	25576	518912	1842	80232	1158	5836	46802	886300	2006	2298	2064	5648	516	112336	3690	8436	101222	55658
386.33788 Da 1181.87 s	19.7	409.327			32366	37176	422	47852	5576	10160	14316	111126	5620	53656	332	21464	45300	170918	2432	1718	2674	9792	268	105914	1544	13660	79730	45672
270.25427 Da 1197.58 s	19.96	293.243			38638	19018	33764	16558	38408	20866	26096	21714	37110	38254	28358	19960	22458	42614	41588	33576	39774	32266	27758	27734	25038	13592	30424	37434
234.17159 Da 1198.12 s	19.97	235.179	LID_235.1805_10.1	C14H22N2O	128928	106674	92898	133702	96638	120668	79326	35640	128110	185194	166600	27398	127208	0	113442	41354	100086	21688	162570	0	141602	42504	116286	91230
234.17165 Da 1219.66 s	20.33	235.179	LID_235.1805_10.1	C14H22N2O	132716	68918	89346	112366	90446	125008	82418	37818	125362	171710	164760	28502	130664	78404	107892	40274	93438	22326	162734	0	144170	46246	176870	77200
234.17165 Da 1239.65 s	20.66	235.179	LID_235.1805_10.1	C14H22N2O	132476	81800	83446	97198	88156	109424	0	35466	0	176594	162642	0	128102	0	104204	41476	94112	22390	166004	117212	136432	44084	0	77818
234.17170 Da 1250.55 s	20.84	235.179	LID_235.1805_10.1	C14H22N2O	132336	85272	78688	110782	92050	121102	71980	53990	119582	171826	157380	24520	112228	81244	101040	40606	90980	23428	0	0	141226	39196	112142	75926
234.17155 Da 1265.30 s	21.09	235.179	LID_235.1805_10.1	C14H22N2O	131350	83248	75766	86168	95530	118284	76112	37074	112374	174678	141610	24646	127260	68538	105800	42260	91046	23252	160728	128886	154832	37336	105342	72280
234.17158 Da 1282.20 s	21.37	235.179	LID_235.1805_10.1	C14H22N2O	130150	79814	74110	93088	88158	102132	77194	32890	114820	169732	142156	24542	119714	71720	94848	41566	85074	23288	144150	105964	123990	38072	97908	76404
234.17168 Da 1299.87 s	21.66	235.179	LID_235.1805_10.1	C14H22N2O	123726	62326	70512	97968	73860	111396	72886	37024	0	174912	132234	23616	98620	65338	96130	39142	77084	23616	147020	0	116464	33702	97596	73358
234.17163 Da 1317.34 s	21.96	235.179	LID_235.1805_10.1	C14H22N2O	118996	81730	70058	86676	78850	104116	72902	35086	96658	165618	129952	23172	107582	66704	82524	36612	77532	24816	137628	151958	140348	49630	97020	70878
234.17160 Da 1343.62 s	22.39	235.179	LID_235.1805_10.1	C14H22N2O	109746	53564	62922	80640	73714	93826	71668	36668	98850	164072	131308	0	92820	61990	83034	35406	67100	25180	133994	96980	110860	35920	94148	61648
234.17171 Da 1362.63 s	22.71	235.179	LID_235.1805_10.1	C14H22N2O	103016	55672	57172	78924	68610	93722	64454	26818	96270	146974	126932	0	99130	57854	79874	35018	65990	22542	126596	102978	120544	35060	91226	64308
320.26737 Da 1371.12 s	22.85	321.275			30842	4708	27640	15602	24544	19718	23614	26484	26990	29310	28014	25688	18274	66212	34876	29974	27138	28160	25812	29722	21680	15074	30476	33708
298.28548 Da 1371.85 s	22.86	299.293			12904	0	10178	8292	12740	7268	11556	18522	10220	13588	7372	6572	0	26934	13354	10584	13134	10692	7976	14828	10082	5984	12750	13756
234.17156 Da 1381.06 s	23.02	235.179	LID_235.1805_10.1	C14H22N2O	102432	62532	61436	81160	68902	84722	72038	0	90704	145350	114012	21218	86170	56900	75682	33506	73956	21366	120578	112320	116760	31386	96382	55284
530.39845 Da 1392.05 s	23.2	553.388			3748	754	2856	780	2002	1184	1974	2340	2398	3006	1896	1192	0	4448	3224	2430	2818	2404	0	4108	1698	612	3178	2864
234.17167 Da 1407.60 s	23.46	235.179	LID_235.1805_10.1	C14H22N2O	96362	51716	55678	77688	65090	84512	66764	28018	93046	137506	117940	0	87286	52384	73578	33390	64670	22026	112310	92090	130062	30518	91138	54222
234.17162 Da 1482.31 s	24.71	235.179	LID_235.1805_10.1	C14H22N2O	82226	47018	48978	67388	56918	78300	54518	26194	81974	141892	103478	20090	73944	46570	63892	30956	56330	18612	105504	0	84188	28138	68500	45606
234.17175 Da 1502.47 s	25.04	235.179	LID_235.1805_10.1	C14H22N2O	81028	60262	98572	70942	56698	81988	57696	25580	74736	116166	99100	19700	75074	81318	61284	26276	58462	19264	99638	86372	85718	29540	63186	47444
234.17176 Da 1519.10 s	25.32	235.179	LID_235.1805_10.1	C14H22N2O	75060	42850	49558	67540	56690	67404	72234	20764	74430	118676	90218	16744	77418	41166	62138	27930	53840	19766	96178	69198	165664	27942	71062	47520
234.17161 Da 1561.26 s	26.02	235.179	LID_235.1805_10.1	C14H22N2O	75740	49164	50566	67342	58066	60114	65854	22046	79126	119592	122020	17670	77022	82862	61886	30332	85286	25252	100612	77294	84912	25768	58314	45750
234.17170 Da 1584.60 s	26.41	235.179	LID_235.1805_10.1	C14H22N2O	82884	43448	102834	64204	55468	96950	49846	21588	82804	110900	92102	15968	72068	45476	62146	27856	52548	19434	106316	65918	159054	27074	66066	45702
234.17162 Da 1599.74 s	26.66	235.179	LID_235.1805_10.1	C14H22N2O	78286	41392	47288	62068	53296	88816	53536	23024	83002	114468	92634	18402	65162	74280	57482	25172	84022	20852	0	63778	88546	26926	74268	44774
86.03505 Da 805.76 s	13.43	85.0278			1972	2006	1722	454	836	1204	1984	2896	1230	2072	1306	3662	1322	2380	2138	3734	3064	5102	1986	1612	572	3862	1022	2130
92.06065 Da 631.24 s	10.52	91.0534			2746	1362	1842	0	1994	0	370	2412	3030	2706	1568	2828	1982	1902	2358	1764	2028	2450	2604	0	0	2330	0	2442
93.03189 Da 719.86 s	12	92.0246			90804	120150	2272	167526	90122	171640	49530	44134	71536	115764	84988	48328	76846	108542	57104	35478	61568	37296	81562	90516	82142	90354	87134	88734
93.93318 Da 146.27 s	2.44	92.9259			12810	11128	12030	9160	11832	11846	11180	14634	11556	12294	11712	14746	12436	13514	11580	12276	11450	9798	11426	12224	9904	13362	11108	10496
96.00209 Da 703.02 s	11.72	94.9948			3732	2772	3164	1222	2326	2494	2944	1786	2684	4050	2742	3462	3700	1582	3124	4894	3192	4578	4108	2832	2570	3196	3478	3586
100.01286 Da 726.82 s	12.11	99.0056			2320	2962	1616	0	2758	0	1662	2306	1966	2696	2590	4190	3080	2836	1918	3402	2158	2776	3104	1766	0	3814	1916	1936
100.04994 Da 653.27 s	10.89	99.0427			2836	2814	3780	2396	3124	3988	3094	3634	3414	4044	2950	3490	2708	3074	3830	2940	2724	2554	2534	3180	2936	2354	3002	3642
103.96149 Da 154.47 s	2.57	102.954			3516	4170	4340	0	3624	2708	1814	3494	3212	2868	5304	4914	3086	5082	3602	2862	4594	2734	2920	2390	0	4138	3744	3580
113.98989 Da 155.51 s	2.59	112.983			3718	3400	3388	0	3458	2248	1644	3286	3292	2810	3974	4606	2752	4652	3204	2826	3738	2982	3750	2550	1466	3152	3606	3414
114.06490 Da 695.23 s	11.59	113.058			2462	2042	1772	2154	2308	0	2354	2108	1996	1992	2386	0	2278	2346	2314	1694	1856	2074	2780	2588	2110	0	2574	2108
114.06526 Da 711.59 s	11.86	113.058			2222	2244	2056	0	2234	1848	0	0	0	2348	1662	2264	1968	1968	2390	2704	1992	1736	2274	1726	1932	2194	0	2046
116.04437 Da 806.47 s	13.44	115.037			5920	4694	3490	1260	2070	0	0	4380	0	4110	2556	7938	1688	5148	5700	6298	6718	8998	2504	0	190	7682	1418	5154
116.08046 Da 676.38 s	11.27	115.073			0	0	0	0	0	1136	3628	0	5130	3486	0	0	0	0	0	0	3188	0	0	4094	0	0	5500	4458
116.08089 Da 667.05 s	11.12	115.074			2816	2102	2196	0	3096	0	0	4632	0	0	4322	5190	2722	3856	3624	4348	0	4104	2492	0	0	4646	0	0
120.01786 Da 720.12 s	12	119.011			2962	4124	0	4846	3370	4622	1926	1426	2306	4188	1870	1318	2270	2538	1838	930	1446	898	2898	2306	1870	2268	2148	2508
122.03340 Da 719.76 s	12	121.026			1858	2518	258	3466	3076	3810	1222	1612	1258	2648	2130	1386	1742	3634	1778	1030	2500	1152	1992	2112	2508	2414	2418	2972
122.03343 Da 796.99 s	13.28	121.026			128	742	314	0	720	4086	1108	3306	2636	2062	0	11740	3524	7640	2890	6462	3954	1804	3384	2532	2080	6070	1938	2914
124.08530 Da 653.07 s	10.88	123.078			1920	898	1446	2674	1498	1890	2128	1728	1628	1664	2364	1306	1846	1592	1316	1184	1750	1698	1750	1846	2386	1450	2402	2044
126.10115 Da 619.98 s	10.33	125.094			3740	3452	4456	818	3792	1350	3366	3756	1448	3780	3636	3808	3464	3832	3628	3686	3930	3792	4240	3928	0	4740	0	4522
128.04392 Da 817.27 s	13.62	127.037			1494	1654	942	9250	1368	1174	1094	1628	1286	1228	1240	2310	1386	2218	1408	1874	1270	1776	1846	1134	1424	2674	806	1278
128.11632 Da 700.85 s	11.68	127.109			0	0	1440	1690	1002	1840	1790	0	2604	1412	1642	2662	256	1166	1336	1664	1656	1648	1740	1926	1992	2578	2046	2468
128.11657 Da 796.49 s	13.27	127.109			176	0	0	364	1400	6770	2490	5176	3162	4708	5776	25034	7488	16142	7028	10444	7668	4844	5524	4756	4206	12788	4490	5564
128.11668 Da 687.56 s	11.46	127.109			908	574	808	496	1404	412	0	1928	0	1944	2890	3592	1726	1650	2554	1344	1694	2096	1996	1828	310	3906	0	2120
130.05952 Da 763.44 s	12.72	129.052			1806	2520	2446	0	2464	1276	1796	2744	1790	2238	3308	2740	3112	2532	2498	3274	2556	2940	2918	1944	0	2990	2970	2596
130.09594 Da 728.69 s	12.14	129.089			26092	12320	22366	0	26088	16828	17210	18466	16114	28588	20992	37618	13624	19406	27618	17310	21060	23000	15210	17394	0	30426	16290	27014
134.01636 Da 702.56 s	11.71	133.009			2834	1590	1810	1152	2116	2026	1780	1362	1752	1854	1764	2330	2888	1076	2360	3164	1630	2986	2528	2530	1636	2380	2236	2468
135.05078 Da 571.60 s	9.53	134.043	Adenine	C5H5N5	386	4642	15524	444	362	398	344	426	318	390	652	172	11218	762	6552	676	460	620	12672	5406	13992	404	4158	1002
135.06503 Da 822.37 s	13.71	134.058			1592	3708	4632	338	1746	578	838	3746	904	1784	3312	2620	4156	1622	1552	3768	912	4052	4244	1244	376	2906	854	1758
136.04835 Da 797.26 s	13.29	135.041			0	6066	5376	13822	17298	11198	12672	7734	10950	0	0	9864	5568	0	18492	7236	18688	5494	0	12108	11632	5458	12498	15438
136.04886 Da 808.35 s	13.47	135.042			16896	24496	24864	13532	4724	8030	5692	26872	10912	18788	15832	20920	19942	20218	0	28534	10874	18306	16780	5808	8220	23410	12458	0
136.04890 Da 631.07 s	10.52	135.042			20102	9544	12084	450	15754	0	406	16936	0	17272	15940	19184	14456	15046	16200	15706	16718	16658	15620	392	414	15984	0	11852
136.04891 Da 826.54 s	13.78	135.042			13804	8166	13592	0	11338	0	2252	22142	0	15548	7910	14980	15484	13288	14266	18342	0	16774	7096	3296	4140	14488	1792	15204
137.02008 Da 671.07 s	11.18	136.013			2358	2318	1616	1876	1812	2030	1588	2118	1930	1470	1296	1620	1328	1334	1380	2138	1156	1566	2596	1572	2450	1362	2260	1740
137.02014 Da 720.20 s	12	136.013			285250	431266	5880	487432	296098	486498	152400	145796	231718	405364	283208	156544	238838	337050	170826	119304	173138	125154	273436	280874	221906	297878	279914	255298
140.04340 Da 654.94 s	10.92	139.036			2250	320	3108	688	2346	0	2800	2752	2410	3042	2372	3192	2586	2380	2358	2682	2460	3850	2300	3126	0	2954	2524	2478
142.02006 Da 198.70 s	3.31	141.013			1440	0	1036	2264	1360	2084	1272	1462	2312	1172	1748	2024	1276	1982	1820	1480	1490	1138	1324	1288	2128	1700	1782	1500
142.02074 Da 168.61 s	2.81	141.013			1316	1860	2236	1438	1464	0	0	1772	1322	1646	2750	3000	1828	504	1406	1618	1114	1332	1892	0	1634	2230	0	194
142.09559 Da 766.98 s	12.78	141.088			5208	5968	6096	4030	4196	3084	4276	4248	4872	4340	6584	5514	3878	3462	4022	4728	3364	4486	5350	4020	3364	4334	4796	4196
144.11069 Da 775.42 s	12.92	143.103			246660	0	0	350512	0	181582	195828	5644	161762	0	0	0	5062	0	0	5548	0	5218	5376	168444	253298	0	144168	0
144.11124 Da 764.91 s	12.75	143.104			244992	185440	211248	10628	183310	9048	166810	155336	0	188080	167720	247742	136562	155952	176250	167512	156154	180188	142404	0	9342	202792	172752	167304
145.04877 Da 706.11 s	11.77	144.041	Indole-3-carboxaldehyde	C9H7NO	2418	3038	2656	25048	2646	3668	2806	3540	2022	3586	1618	15386	1676	4442	1538	5080	2086	8076	1430	1940	2398	11492	2216	1858
146.05388 Da 130.83 s	2.18	145.047			1726	1492	1728	2282	2052	1524	1220	1240	1338	1374	1764	1542	1674	1336	1356	1636	1068	1322	1360	1406	2148	1586	1364	1186
146.05403 Da 803.97 s	13.4	145.047			8974	10564	7730	3308	5116	6956	10402	11366	6922	7942	0	14368	4548	10456	10280	11842	14320	16348	5808	6676	1542	16728	3222	11164
146.09047 Da 643.64 s	10.73	145.083	5,6-Dimethylbenzimidazole	C9H10N2	1540	0	600	2556	1640	1738	0	1434	1292	1736	2850	2242	1394	1846	1390	2106	1852	1554	1508	1890	0	2028	1998	1252
146.12668 Da 748.91 s	12.48	145.119			1040	0	1090	538	926	1854	1316	1882	1566	2266	2328	1690	1202	2418	2404	1706	1814	1774	2158	1600	1252	1678	2286	1952
146.12683 Da 698.18 s	11.64	145.12			4282	3390	3834	1304	4038	3106	3902	2174	2846	3200	2546	2300	2754	1690	2926	3962	4098	6194	3450	3188	2626	3238	3658	3062
147.02807 Da 656.94 s	10.95	146.021			5484	1586	5898	5046	5886	7842	3328	4062	11536	7044	4630	2142	5058	3238	1586	2262	3822	2510	1994	4202	4924	3808	4184	4614
148.01201 Da 797.12 s	13.29	147.005			0	0	254	0	1346	3642	1594	3220	2184	2724	2266	10610	2582	6946	3180	5650	3104	2016	2446	2484	2128	5286	2750	2594
150.06420 Da 684.99 s	11.42	149.057	Benzylacetate	C9H10O2	12710	8172	9586	0	10012	0	0	9314	0	9280	9674	9152	7900	9346	8176	8958	8494	9226	9482	0	0	9580	0	10286
151.00527 Da 738.76 s	12.31	149.998			4626	7014	5754	7674	4522	4154	7750	6030	3798	5234	5360	10210	6214	0	4842	5446	3946	6578	4904	5590	8352	6492	4900	4454
151.88970 Da 145.70 s	2.43	150.882			4890	4230	4044	2282	4264	3644	2328	4236	3518	3296	4874	5482	3700	5280	3692	3944	4114	3426	4654	2730	3126	5320	3580	3898
152.04288 Da 1537.64 s	25.63	151.036	Methylparaben	C8H8O3	11182	21326	1468	28924	13924	28136	5042	6602	9572	16014	9636	6050	11006	13994	8178	4094	7856	4662	12126	11902	8884	11000	13124	13448
152.04296 Da 1597.07 s	26.62	151.036	Methylparaben	C8H8O3	10618	19044	1266	29962	10556	24260	4892	5688	8642	18714	9006	3946	11976	13024	8296	3974	10494	4480	11258	11228	7984	10534	14158	10698
152.04296 Da 1148.33 s	19.14	151.036	Methylparaben	C8H8O3	14872	30152	1730	42204	15690	41976	7810	7460	14728	26356	12552	8622	15666	0	10884	5654	9090	5934	18688	15048	13594	16758	21394	16878
152.04297 Da 1365.49 s	22.76	151.036	Methylparaben	C8H8O3	12630	22674	1560	33314	15042	33842	6030	6824	11298	19464	10996	7170	12348	16946	9718	4320	10068	5616	12876	13740	10998	13422	15166	14578
152.04297 Da 1408.96 s	23.48	151.036	Methylparaben	C8H8O3	11084	23194	1540	36346	14792	31890	5828	6180	10224	19488	10658	7422	11982	15620	8802	4014	9758	4918	12934	12484	11602	14608	15434	12636
152.04299 Da 1313.96 s	21.9	151.036	Methylparaben	C8H8O3	12394	25244	1462	32846	14878	33198	6756	7316	11016	20916	11214	7418	13318	16810	9228	4106	8704	5564	13596	11470	10702	12050	16734	14324
152.04299 Da 1570.30 s	26.17	151.036	Vanillin	C8H8O3	8548	20928	1152	27734	10654	26328	5140	5408	10280	14998	9282	5874	10844	13114	7788	3462	7296	4092	11478	10442	8996	9078	13260	11114
152.04300 Da 1552.95 s	25.88	151.036	p-Anisic acid	C8H8O3	11344	20182	1230	30652	13024	28170	4970	5848	9240	17624	8778	5964	11464	14848	7404	3962	6562	4758	11740	11686	9606	10648	14272	11254
152.04300 Da 1427.13 s	23.79	151.036	Vanillin	C8H8O3	10984	22078	1782	32656	14466	32208	6026	6586	11726	16916	10346	7338	13410	15174	9210	4220	8424	4458	12584	13698	10878	12872	14934	13698
152.04300 Da 1518.10 s	25.3	151.036	p-Anisic acid	C8H8O3	9534	19734	1774	33216	12612	29628	5314	6136	10492	17670	8932	6460	12440	15176	8870	4322	9076	4836	11074	11310	10334	12752	13974	12010
152.04302 Da 1111.25 s	18.52	151.036	Methylparaben	C8H8O3	14054	32540	1630	54956	16630	45012	7834	9406	13016	26344	13678	8038	15626	19866	10744	5582	10924	6286	19202	17638	13272	17366	20364	17788
152.04303 Da 1193.63 s	19.89	151.036	Methylparaben	C8H8O3	13812	27250	1740	31580	16232	37644	7176	7418	10316	20476	0	9028	14994	16682	10670	4318	10112	6242	15718	15794	12646	15602	17134	15386
152.04304 Da 1221.63 s	20.36	151.036	Methylparaben	C8H8O3	11476	27386	1678	37374	15738	35796	7104	6350	11970	21456	10618	8672	15688	17218	10546	4676	11304	5378	15658	13368	13196	15646	15858	14876
152.04307 Da 1027.16 s	17.12	151.036	Methylparaben	C8H8O3	18736	52998	1340	68240	21844	54064	9180	15092	18832	37422	17700	12662	19156	24868	15074	6480	13690	7784	23894	17626	15350	21458	21146	21048
152.04309 Da 1334.52 s	22.24	151.036	Vanillin	C8H8O3	12094	22966	1366	35538	15538	37926	6526	7018	11614	18182	10202	7872	11554	12656	12148	3860	8676	4310	12194	13128	10134	13160	18046	14932
152.04310 Da 719.95 s	12	151.036	Methylparaben	C8H8O3	7122314	8666354	145322	8949756	7516714	8567174	4138006	3940224	6248730	8045268	7424856	4177544	6432390	8334520	4875644	2922290	5116470	3176668	6263822	7587458	6355264	7797860	7167034	7327698
152.04311 Da 1128.59 s	18.81	151.036	Methylparaben	C8H8O3	13736	30214	1460	43924	17914	44898	6386	8074	13652	25008	14470	7626	16988	16396	12208	4708	10702	6248	19850	15076	13288	16122	19922	17008
152.04311 Da 1167.70 s	19.46	151.036	Methylparaben	C8H8O3	13378	31372	1452	41358	17338	37170	7398	6746	12382	22822	12954	8498	15624	18902	9940	4772	10422	5718	17946	14666	12796	14086	20588	16464
152.04312 Da 1098.24 s	18.3	151.036	Methylparaben	C8H8O3	16298	31016	1308	67898	19020	45094	9304	8810	15118	25430	14912	11674	17668	20622	12140	6404	13296	6516	19830	17240	13034	19194	21406	18028
152.04312 Da 836.63 s	13.94	151.036	Methylparaben	C8H8O3	21142	51922	1244	95276	31112	76966	13394	16026	24808	39780	20654	16298	23140	36986	21246	9558	18400	13570	27464	29744	27164	28256	32226	33016
152.04313 Da 1060.30 s	17.67	151.036	Methylparaben	C8H8O3	20362	54582	1242	77488	21266	70784	8446	13786	13122	44998	16228	18026	30158	28670	14314	9346	11772	11476	20576	27196	16970	26992	28912	20882
152.04314 Da 1454.01 s	24.23	151.036	p-Anisic acid	C8H8O3	10646	23704	1250	32690	14020	34206	6270	6678	11642	18100	10932	7416	12198	15210	10308	3870	7800	4062	12420	12488	9778	13904	14734	15396
152.04315 Da 1493.21 s	24.89	151.036	Vanillin	C8H8O3	10600	20500	1368	31284	14500	31018	6144	5362	9990	16998	9612	6822	11826	16674	8892	4140	9846	4488	13242	10926	9866	12292	16746	12196
152.04319 Da 1276.58 s	21.28	151.036	p-Anisic acid	C8H8O3	13568	22910	1460	39200	14974	41002	6856	7574	10198	23292	11708	9244	14998	16928	10200	3846	9604	5328	12936	13368	12192	14784	18324	14454
152.04321 Da 1297.65 s	21.63	151.036	p-Anisic acid	C8H8O3	11732	24928	1292	35368	14908	36330	6400	7182	12426	19366	11278	8332	13748	12932	9594	4240	11312	5300	14516	14448	10940	13714	16732	13864
154.02181 Da 701.77 s	11.7	153.015			2070	2014	1926	1344	2106	1702	2028	1450	1592	2410	2012	1954	2948	2166	2026	3834	2480	3332	2704	1472	1732	1990	1996	3004
154.09522 Da 634.31 s	10.57	153.088			3800	0	3750	1316	3674	3452	3946	4668	0	4094	3228	4928	4130	3652	4612	3148	4284	5718	5178	0	1282	4710	0	3184
154.13165 Da 795.43 s	13.26	153.124			1716	1862	1698	1922	1610	1134	0	2338	160	1534	1174	2062	1424	1582	1494	2678	1466	2096	1894	1452	330	2648	1872	0
155.06644 Da 818.21 s	13.64	154.059			4836	4812	3910	6536	3230	4090	4244	4880	4546	4738	2724	6216	4954	5662	5446	8106	4828	9316	3278	3076	2114	8284	4000	4760
156.07418 Da 615.11 s	10.25	155.067			4806	5338	5782	6276	5718	5820	5874	5448	5150	4782	5266	4248	5718	5056	5014	5382	5930	3780	5810	4790	5310	4970	5234	5612
156.11074 Da 767.03 s	12.78	155.103			19184	13282	12526	0	14536	0	16810	13710	15710	15092	15032	17496	14872	13176	13202	16870	13670	15716	11508	17924	0	14494	18330	15086
157.07084 Da 634.56 s	10.58	156.064			2338	0	938	126	1864	0	776	6454	1150	3702	1370	22296	1336	6818	1724	7428	3372	17376	174	2488	334	20864	1714	6838
158.08993 Da 615.38 s	10.26	157.083			6108	5874	5284	5324	5846	3768	3320	10376	3812	7528	10658	14098	6976	8906	8776	8542	8480	11066	8040	2818	5100	10580	5918	10396
158.12610 Da 797.98 s	13.3	157.119			966020	823040	886736	815938	687230	1023012	1275414	1113200	1068414	1017838	631646	1171756	831748	1251058	855866	732660	757736	831776	666600	851614	841044	729118	998394	810012
158.12632 Da 812.05 s	13.53	157.119			126786	93120	64088	77114	106652	144376	119586	95852	0	0	80818	97594	86126	33682	97374	84206	92534	79910	99194	128162	11492	59360	109714	19582
158.12638 Da 773.84 s	12.9	157.119			2190	19142	16202	3372	20128	2628	3088	17170	3358	19472	16988	20878	17626	17564	19674	20914	21268	17556	20794	3326	2998	16150	3370	21370
160.08743 Da 776.22 s	12.94	159.08			24262	43138	43006	12666	22156	4276	4508	4182	4454	4680	4866	4904	5008	2978	4104	7682	3482	9232	5034	3000	2340	4952	3650	4038
160.10554 Da 618.69 s	10.31	159.098			4214	4234	3728	136	4982	13528	5560	11716	8394	9988	14242	12824	6038	8902	7676	9224	7278	8998	7904	4826	1092	13468	9832	8818
162.04854 Da 688.70 s	11.48	161.041			4272	3878	3414	2804	3480	3276	4282	0	4130	3908	4468	4182	4588	4046	3920	4464	3782	4018	3926	3580	3854	4120	3482	5066
164.07895 Da 783.59 s	13.06	163.072			69320	53284	50028	51674	38600	44700	61534	62468	66610	67748	48708	57954	1460	59852	67176	74920	56350	53454	58122	71046	70196	53038	54648	73574
166.02189 Da 721.29 s	12.02	165.015			684	246	0	0	840	0	1314	2300	2412	1268	2282	2560	2222	2494	1860	1904	1646	692	2070	1256	0	1448	2216	2224
166.04302 Da 864.75 s	14.41	165.036			0	0	0	2634	0	2800	2792	0	1738	0	0	0	0	0	0	0	2788	0	0	5216	0	458	3446	2508
166.04341 Da 731.34 s	12.19	165.036			5188	4658	6874	3164	7636	3274	5790	8756	5742	4960	7350	4852	6232	5526	12382	5468	10208	7362	5268	10396	6228	4632	4316	5230
166.04370 Da 877.02 s	14.62	165.036			1424	1542	1468	224	1648	1074	0	2880	0	1562	1636	5814	1636	3044	0	1366	0	2482	1808	168	2582	3382	1768	378
166.05819 Da 755.63 s	12.59	165.051	Ethylparaben	C9H10O3	4206	1362	784	18052	2130	3110	3222	9970	1626	1326	10950	6478	1326	12482	1282	3906	1200	3540	1882	1174	1572	15438	1474	1720
166.05834 Da 687.91 s	11.47	165.051	3-_2-hydroxyphenyl_propionic acid	C9H10O3	4876	6434	6302	3546	5388	0	0	4508	4656	4988	4878	5626	5428	4712	4802	5444	4362	6600	5236	4688	3138	0	5826	6332
166.09434 Da 679.13 s	11.32	165.087			0	972	712	0	1354	948	1526	0	1894	0	3418	0	3974	0	5182	0	4012	676	9566	4856	10064	0	9952	7744
166.09489 Da 744.20 s	12.4	165.088	raspberry ketone	C10H14O2	908	7414	708	1388	966	0	0	2268	0	2360	1246	46054	818	5338	988	15458	1072	42736	1428	0	1032	106948	1700	1818
168.07381 Da 762.39 s	12.71	167.067			2566	2948	2572	1210	2132	2442	2392	2406	2590	3304	3270	2246	2592	2180	3362	3826	2802	2748	3096	2810	2610	3084	2342	2796
168.11010 Da 789.15 s	13.15	167.103			2230	2196	2058	9758	1932	1396	1672	1840	1288	1280	1266	13800	1702	2804	1700	4002	1848	10202	1802	1624	1968	10762	1698	2596
168.14615 Da 811.06 s	13.52	167.139			0	0	0	9328	0	8332	7564	0	6654	0	0	0	0	0	0	0	0	0	0	5468	4364	7432	6852	0
168.14672 Da 820.23 s	13.67	167.139			7696	7104	7634	0	6804	0	0	10190	0	9680	3930	10542	8786	7686	7942	13430	11496	14858	5774	0	0	11944	0	7994
169.99171 Da 652.88 s	10.88	168.984			2886	700	2720	4250	2480	4106	3190	2798	3012	2588	2314	1770	2490	1890	1670	2196	2278	1870	2486	2620	4568	1034	2292	2150
170.08931 Da 627.47 s	10.46	169.082			3490	1580	2534	1320	2968	3628	3152	0	3110	3632	1838	3984	3400	2470	2842	1364	2932	0	0	2244	1202	3352	3582	3696
170.12573 Da 798.43 s	13.31	169.118			8472	14846	10352	18022	10642	14176	14012	15512	13236	0	8182	159058	10850	19030	8518	15518	12266	69900	9492	13008	13352	93392	10912	10482
170.16221 Da 794.60 s	13.24	169.155			2640	1392	1578	1050	3466	1398	978	2418	1002	2162	1810	2392	1532	2496	2806	2292	2134	1700	2052	1604	1130	1588	1678	2132
171.03042 Da 663.63 s	11.06	170.023	2-Toluenesulfonamide	C7H9NO2S	508	478	534	592	9408	47678	20966	25968	33138	22256	50778	53468	32848	47498	37378	39072	37292	11334	35964	37276	44618	36810	35610	37356
171.08559 Da 641.52 s	10.69	170.078			2910	0	2148	2658	2068	2158	2612	2126	2768	2148	1974	2262	2216	1552	1964	2530	1828	1550	3276	0	202	2308	2382	1800
172.01441 Da 590.18 s	9.84	171.007	4-Methylbenzenesulfonic acid	C7H8O3S	2158	704	898	194	1650	1152	2686	1080	1182	1544	1182	742	360	1598	1926	1820	2030	1152	968	866	302	1088	954	1626
172.10493 Da 663.00 s	11.05	171.098			41972	39660	31596	51932	39312	14302	11184	63010	11502	40098	46200	123486	31606	49442	35520	44518	38626	49234	42538	12202	52638	82594	0	47860
172.10503 Da 637.72 s	10.63	171.098	FA 9:1_1O	C9H16O3	39698	13288	30712	2498	43580	41996	43234	40342	44416	45514	36812	41126	33230	38410	41232	37540	43110	38292	9532	44478	2760	43460	44524	33756
172.10505 Da 697.02 s	11.62	171.098	FA 9:1_1O	C9H16O3	12782	12602	11954	64202	15304	20968	16736	21412	22044	19512	25736	41660	14016	18518	19374	23746	19492	19848	20342	16218	60500	31030	18456	24202
172.14127 Da 816.96 s	13.62	171.134			393274	471282	374590	255230	374584	267944	296672	498122	270012	495992	310106	1109084	428400	531890	321654	405014	325280	674840	453300	274262	181256	871216	296786	240576
172.14139 Da 837.39 s	13.96	171.134			102700	121292	100978	122562	89320	85654	92852	126896	83292	75606	106290	138468	68442	119730	91280	157394	125648	136516	124826	120590	47672	126014	93352	125748
173.99384 Da 568.35 s	9.47	172.987	Phenol sulfate	C6H6O4S	4152	3486	1666	0	2590	0	1682	18836	1456	7698	4912	116818	6328	25922	1150	27942	3282	41458	5042	19172	0	14180	1720	15104
174.02732 Da 702.76 s	11.71	173.02			3882	1914	2444	2274	3050	2900	2930	2386	2656	3226	2830	2542	3910	1764	3744	4462	3234	4158	3232	3420	2300	3592	3152	3452
174.12021 Da 727.77 s	12.13	173.113	Gramine	C11H14N2	5400	5710	3764	15408	5470	20246	0	8890	6782	7382	9590	20386	5244	6564	7230	8948	6416	9930	6218	0	16224	15030	6844	7870
174.12050 Da 685.51 s	11.43	173.113	Gramine	C11H14N2	6554	4294	5064	13014	6200	10962	7480	13622	6524	9118	9586	14196	6230	10918	6836	8170	6874	10204	11414	11370	12870	13188	7922	11420
174.12079 Da 711.03 s	11.85	173.114	FA 9:0_1O	C9H18O3	17152	12980	14480	7348	15692	12434	0	17252	0	15616	18102	17058	14858	14418	16636	19224	13476	17282	16824	0	9712	17910	0	17368
176.13591 Da 687.80 s	11.46	175.129			0	0	0	0	582	2248	1428	2970	2504	2458	1646	4168	2118	1858	1650	1844	1206	1386	3330	1378	2518	5760	3456	3660
177.07395 Da 689.80 s	11.5	176.067			6992	3716	1612	15308	3058	4662	2288	2696	89532	4444	6886	3788	4032	6354	2072	1920	2032	3818	4022	2330	7930	0	2968	2206
178.09434 Da 746.75 s	12.45	177.087			6088	6972	5842	2328	6508	2026	1872	7868	5588	5728	6016	7242	6556	7306	5022	8410	5968	8448	5092	0	1808	8068	5418	5616
179.05306 Da 570.15 s	9.5	178.046	Hippurate	C9H9NO3	564	2476	632	716	598	1246	3796	27834	918	2100	1734	14554	978	2762	654	2338	1916	11662	296	398	780	37960	484	544
180.05867 Da 688.30 s	11.47	179.051	Myo-Inositol	C6H12O6	3324	3082	3304	2364	3300	3166	2312	2860	2708	3094	3296	3864	3030	2670	2708	3142	2444	2798	2394	2370	2360	3830	2756	2718
180.05938 Da 579.11 s	9.65	179.052	Theophylline	C7H8N4O2	3618	2364	11078	17808	9718	4416	6910	4656	6102	14570	40990	23200	10742	8874	2736	1248	25406	26284	8242	4134	28076	12380	1972	2150
180.05939 Da 616.90 s	10.28	179.052	Theophylline	C7H8N4O2	18602	8676	2074	5676	25572	19650	10162	35594	20880	17126	78128	0	9670	7630	374	1196	4932	10126	3364	1422	19256	20788	4372	3036
180.05948 Da 606.62 s	10.11	179.052	ParaXanthine	C7H8N4O2	26936	10160	2178	8598	28564	30074	7766	38534	35206	28856	67068	68952	11572	10496	444	1720	6202	15098	4310	2454	11844	0	6234	3276
180.07329 Da 788.26 s	13.14	179.066	Ethyl 2-methoxybenzoate	C10H12O3	44952	100476	15828	19362	7422	9648	8674	13508	12468	12090	23772	88226	9862	19302	12950	31938	13196	6946	89926	44264	19382	64974	10442	13696
180.07333 Da 637.86 s	10.63	179.066			4518	0	3680	2750	3928	2078	2384	3154	0	4154	3754	2884	4250	3158	4612	3564	3332	2958	4158	4324	2710	3874	4410	4034
181.92825 Da 156.22 s	2.6	180.921			1858	1592	1594	1288	1848	1866	1506	1890	1438	1720	1776	1608	1826	1496	1580	2146	1688	1780	1846	1466	1274	2042	1870	2042
182.08894 Da 652.55 s	10.88	181.082			0	0	1336	1348	1428	3816	2448	4288	3960	5132	5518	20352	6668	9720	8642	9222	9980	6920	4142	3770	5380	10504	5360	6984
182.12523 Da 807.02 s	13.45	181.118			2012	1404	1536	1736	1530	1502	1454	1492	1570	1264	1142	1830	0	1330	1224	1336	1344	1586	1202	1326	1054	2946	1128	1310
184.03194 Da 655.20 s	10.92	183.025	DIHYDROXYMANDELIC ACID	C8H8O5	3352	964	4786	158	4082	1852	1566	3900	1404	3878	3386	4756	4244	3502	4584	3920	2892	5380	3024	4612	1626	3680	0	3788
184.10473 Da 655.17 s	10.92	183.097			6320	3600	8586	2314	6344	5094	4002	2872	3582	3244	4134	4026	2536	3202	3428	3092	3286	2958	3032	3602	2960	3478	4740	3876
184.14086 Da 815.35 s	13.59	183.134			48336	39016	29626	30428	52656	39680	34698	41314	51446	49266	37234	140964	48344	67700	41720	50024	41576	84466	55430	26876	34206	224590	49850	27804
186.12000 Da 699.28 s	11.65	185.113			10530	10046	8806	9086	8454	12104	9356	9678	10250	8650	8480	16536	7146	11704	9156	11388	9312	13312	10038	0	11796	14736	9602	9920
186.15647 Da 855.83 s	14.26	185.149			23572	31216	27320	72912	22168	18098	13012	29678	14710	19062	17822	18860	20858	23270	18002	30244	17652	30114	15890	17010	0	21324	18182	22084
186.15659 Da 832.59 s	13.88	185.149			64332	88328	69148	3790	75698	62722	55128	67696	48962	98044	117406	20954	100758	87950	60740	122014	84232	170820	100834	74480	31004	79572	60620	45686
187.11555 Da 594.29 s	9.9	186.108	3-Amino-Beta-Pinene	C10H18ClN	3568	3018	2990	256	1944	2384	4688	3510	2394	2898	2550	3268	1884	3342	2840	2030	2736	3590	3410	2438	2706	3010	4918	2996
188.00892 Da 641.58 s	10.69	187.002			10830	1072	18346	258	16954	0	0	240066	0	122330	16316	1034600	13674	131344	2340	57974	20460	189244	2118	0	154	1373460	11626	31786
188.09916 Da 590.89 s	9.85	187.092	Azelaic acid	C9H16O4	16672	5160	3594	3558	6332	5740	6070	9902	6052	18124	8594	6930	5296	20234	20506	5774	21582	0	5926	5906	4018	7368	6160	23562
188.09978 Da 573.64 s	9.56	187.093	Azelaic acid	C9H16O4	4112	13586	11842	2850	17046	3882	3428	29604	3412	5062	28842	26892	15894	4084	4018	23082	4736	20444	21976	3526	3742	29244	3080	5586
188.13576 Da 771.82 s	12.86	187.128	10-Hydroxydecanoate	C10H20O3	12248	14476	12306	14660	10746	8974	6966	17086	12348	14434	15974	45000	12690	19076	14934	18174	11936	35568	13636	17536	8314	53834	17520	16522
188.13578 Da 707.57 s	11.79	187.129	10-Hydroxydecanoate	C10H20O3	9368	8282	8744	1422	9792	6044	10020	9460	9220	8138	9396	12234	9314	9348	10306	10660	9858	4198	11292	7756	0	8800	7454	11168
188.13583 Da 747.70 s	12.46	187.129	10-Hydroxydecanoic acid	C10H20O3	13436	14480	10780	5500	14684	13540	15772	15216	14048	14154	11878	14210	13690	17130	15448	14418	12730	11810	12736	12520	5404	10794	14218	15816
189.94105 Da 126.56 s	2.11	188.934			8252	8670	8546	7132	8746	6870	7912	8016	7284	8156	7562	8076	8214	8018	7822	8572	8046	7988	7938	6768	7470	8486	7214	7442
189.94118 Da 233.62 s	3.89	188.934			8300	8292	8062	916	7928	3486	5244	7830	5844	7748	7630	8726	7600	8138	7698	8902	7644	7694	8646	7462	1068	8112	6248	7808
190.09391 Da 751.39 s	12.52	189.087			1796	1602	3400	0	2742	0	0	2566	0	2898	1298	0	3512	2088	3492	3200	2524	4730	2644	0	0	2244	3308	2062
190.11510 Da 666.34 s	11.11	189.108			2060	1544	1058	3422	3790	0	0	11968	5858	6006	9480	16916	3936	9592	2424	9436	4186	8158	4034	0	2318	19466	5104	8930
190.13355 Da 850.44 s	14.17	189.126			5032	18544	5344	6642	2772	262	1284	10078	1484	7684	1274	31380	2436	12504	3242	17744	6786	24720	1062	3634	398	21044	2050	7612
191.95667 Da 155.87 s	2.6	190.949			2816	2866	2998	1106	2534	1608	1988	2852	2260	2912	2740	2988	2540	2470	2796	2430	2622	2780	2974	2658	1384	2882	2012	2604
192.07156 Da 619.74 s	10.33	191.064			1588	1542	1822	234	1618	1468	462	2000	1518	0	1830	1630	1760	1500	1952	1442	1454	1078	1572	0	212	922	0	1280
192.10947 Da 809.38 s	13.49	191.102			2522	4392	2270	0	2758	3976	3040	5308	2292	3998	1462	10664	2208	3562	2404	4290	2610	8708	1914	2486	2812	6168	3144	4352
194.08853 Da 745.93 s	12.43	193.081			2310	3244	1832	1844	2882	2164	1470	3834	2174	1880	2232	7016	3164	3186	2702	3662	2598	5584	2660	2846	1806	6246	2136	2162
194.12492 Da 794.72 s	13.25	193.118			1040	2856	972	6160	900	2202	752	1900	694	1032	400	43322	0	0	378	5662	614	18418	706	846	0	50322	548	776
194.16146 Da 778.77 s	12.98	193.154			1582	1858	1078	0	810	874	832	1966	950	1604	1218	2650	1690	2612	1458	2490	1602	2706	708	1498	838	2388	1434	2162
195.08340 Da 833.73 s	13.9	194.076			0	0	210	8608	0	10218	11574	0	6674	0	382	0	0	0	10556	378	12280	0	166	7512	8850	0	9892	12052
195.08411 Da 843.36 s	14.06	194.077			6712	12746	9748	0	10626	0	0	12696	2046	8448	8204	7230	7664	15574	0	10828	0	10294	8160	442	324	4530	0	0
196.03159 Da 664.08 s	11.07	195.024			1638	2110	344	2636	1364	0	1188	1396	1458	2628	1924	1092	1658	1826	806	528	1098	642	1984	1350	0	1014	2230	1206
196.10366 Da 700.14 s	11.67	195.096	Ethylbeta-carboline	C13H12N2	1632	1520	1368	2468	2552	3068	1936	4112	2322	2162	3674	2428	2194	1910	1842	2286	2346	0	1884	1878	1634	2128	2328	0
196.14048 Da 792.15 s	13.2	195.133			33900	30182	26522	44172	29060	15398	29804	28160	22650	19468	18454	62464	24402	29082	22610	34678	17564	36418	21130	22796	28058	34322	26204	23794
198.11959 Da 714.20 s	11.9	197.112			2848	2126	2292	0	3036	1970	2272	3068	0	2180	2568	3806	1764	2080	2812	2616	2068	1934	2466	1890	1938	3186	1882	2550
198.11978 Da 794.77 s	13.25	197.113			2678	1942	2458	3366	2128	1926	1096	3100	2176	2294	2988	3950	2490	2942	2264	3990	2154	2712	2606	2818	1534	2816	2102	2380
198.15613 Da 835.14 s	13.92	197.149			16618	22810	13546	9742	16662	14424	14388	33450	14034	17288	25382	204652	20630	33744	15670	30272	18576	97962	22736	21626	11250	212792	14104	20422
199.15182 Da 747.68 s	12.46	198.145			2392	2026	2346	244	754	410	4168	2714	660	2892	1160	1488	2688	2974	390	1032	922	2148	3006	1846	748	1760	792	2806
199.89360 Da 149.95 s	2.5	198.886			3330	3006	2898	2492	2370	2854	2392	2638	3036	2204	3552	2530	2582	2748	2688	2538	3148	2762	2748	2392	3236	2794	2714	2468
200.00850 Da 560.76 s	9.35	199.001			1714	1558	1316	1416	1422	1610	1742	1792	1802	1394	1548	1370	1730	1660	1596	1862	1584	1476	1944	1880	1986	1440	1692	1830
200.00854 Da 668.09 s	11.13	199.001			400	1280	414	1774	1832	0	0	12156	1556	814	1872	77092	1652	3622	2580	8710	2684	22868	248	864	438	31010	1218	1734
200.09810 Da 604.74 s	10.08	199.091			5654	5172	5210	3230	4482	2246	6528	5410	2908	4914	7138	5702	4506	4796	5430	5998	5532	5384	5880	6734	1478	5730	5892	5710
200.13534 Da 734.83 s	12.25	199.128			15178	15136	13322	13280	15146	12794	21940	14902	14720	13454	14818	30094	12000	14390	16556	16254	14930	15100	10362	16978	13346	23026	15230	14606
200.13566 Da 709.96 s	11.83	199.128			11206	11814	10578	0	13040	0	10450	13092	7730	12612	17450	24274	13876	18514	12062	14858	13688	10754	16402	2222	1282	24866	9880	14396
200.17161 Da 858.10 s	14.3	199.164			340484	545048	245916	115590	341244	354782	220998	594002	100558	405008	240980	1273202	275006	395158	350794	547920	310536	1340574	109314	340750	221194	1356206	214454	476110
201.89056 Da 149.66 s	2.49	200.883			1818	1590	1768	1626	1468	1898	1866	1670	1618	2314	1892	1668	1558	2002	1902	1688	1794	1372	2022	1732	1540	1726	2174	2226
202.11482 Da 709.01 s	11.82	201.108			7462	7918	17320	4758	5374	4196	0	8258	3840	8076	7240	19094	8012	6434	6576	8722	9360	12194	6808	4592	3202	13200	6280	17034
202.15101 Da 767.40 s	12.79	201.144			8280	6814	7192	4038	5736	2608	8126	6982	6220	7442	7788	7196	6036	7016	6518	7050	6868	6814	7190	7822	6744	5260	7580	7166
204.09122 Da 580.59 s	9.68	203.084			3706	9182	1754	8452	1764	9984	1896	2904	1666	2038	2824	31834	1908	4408	1454	3262	1866	8296	1878	1522	1216	20672	1880	7934
204.12996 Da 681.33 s	11.36	203.123			2046	2506	2476	2426	2366	1654	3244	6170	3692	5226	6916	10638	3882	7904	3760	5294	3272	5428	3600	2750	1736	9686	3906	4318
205.06807 Da 601.52 s	10.03	204.061	Indolelactic acid	C11H11NO3	514	1934	672	210	908	1340	792	2646	784	1580	702	19052	1598	3314	544	3298	2074	10816	632	0	1348	15012	584	786
205.12530 Da 577.20 s	9.62	204.118			6394	2542	2232	1806	4864	16006	2242	3116	2552	3584	2766	7170	2440	5234	1854	4994	2952	6642	4634	1992	1630	7338	4320	3342
206.10908 Da 583.81 s	9.73	205.102			1222	0	1558	0	1666	1650	1866	1462	2134	1574	950	1382	0	1838	1886	1760	1646	1232	1730	1722	1720	1496	1502	1846
206.12530 Da 794.03 s	13.23	205.118			0	1520	1940	0	1546	1492	1298	1746	0	1498	936	2250	1662	2004	1778	1872	1294	1590	1628	1210	1908	2216	1350	1642
206.13612 Da 670.57 s	11.18	205.129			23520	2120	11172	0	7936	0	0	2218	3526	6008	34286	3992	8418	1632	8632	1358	13446	1324	6432	0	0	2690	0	730
206.16033 Da 882.05 s	14.7	205.153			0	0	1112	51630	0	27942	17520	0	11590	0	0	0	630	29970	0	0	17118	0	566	13708	10236	44114	15646	0
206.16061 Da 797.64 s	13.29	205.153			470	890	1004	1098	910	3368	1688	0	2872	3440	3850	14522	0	9854	5062	6982	4564	2790	3826	2986	2414	7904	2844	4450
206.16095 Da 891.67 s	14.86	205.154			15216	24284	13462	0	15666	0	374	24488	12382	35864	13068	164224	20428	26450	13214	20054	0	21538	17024	12602	0	47036	0	21686
207.08336 Da 753.62 s	12.56	206.076	N-Acetylphenylalanine	C11H13NO3	276	0	326	270	208	204	232	0	0	224	56582	54776	52494	68970	97696	46942	244	21884	92204	88766	33978	36520	28068	38572
207.08350 Da 621.04 s	10.35	206.076	AcetylPhenylalanine	C11H13NO3	2626	3130	2566	1358	3140	1388	2868	2364	0	2376	2402	2640	2674	3282	3166	3050	2290	3626	2564	1678	1480	3384	2338	2968
208.01331 Da 660.82 s	11.01	207.006	2-Naphthalenesulfonic acid	C10H8O3S	4138	2562	3866	694	3406	0	3732	5048	3296	3222	3184	3272	3476	2968	2942	7252	4558	4538	8082	9714	0	5476	5518	3246
208.14001 Da 809.66 s	13.49	207.133			20772	24536	14856	14610	22460	20836	16170	20606	16704	24738	19876	21058	18646	16032	18738	20052	16902	23016	18842	19614	11674	13804	17622	20800
209.84617 Da 144.86 s	2.41	208.839			4424	4750	4550	2586	4240	3976	3090	4538	3990	3614	5298	5626	4256	4634	4672	4084	4828	3936	4174	3200	2340	4834	3454	4300
209.92207 Da 153.11 s	2.55	208.915			1860	2390	2222	1924	2626	1662	1452	2244	2076	2094	2920	2048	2054	2262	1884	2062	1988	2230	1828	1616	1586	2256	2312	1982
210.06812 Da 762.46 s	12.71	209.061			6068	6348	5162	2870	4646	0	4536	5158	4380	5462	4736	4838	5930	4178	5452	6280	5002	6634	5268	5188	2636	5346	4510	4946
210.11930 Da 772.29 s	12.87	209.112			2612	2068	1754	1180	2054	0	1110	1640	1222	2196	1910	2988	1376	2588	2402	2194	1670	2080	2022	1278	0	2240	1546	2444
210.15579 Da 751.50 s	12.53	209.149			84510	89736	73584	10294	101484	8244	100376	93190	85314	86104	78972	112210	98104	113960	101584	117748	84806	137636	85144	82632	3128	116808	112336	106096
212.06270 Da 765.50 s	12.76	211.055			14358	13614	12794	4308	13960	3120	11150	12764	4418	11252	12706	11704	12988	15028	11432	14420	15770	12660	11754	13878	2906	13468	14414	13644
212.09771 Da 771.29 s	12.85	211.09			3718	2214	2334	3946	2264	3024	2608	1634	2750	2488	2248	2774	1964	2476	1990	1644	2178	490	1620	2326	3268	2846	2508	2462
212.13435 Da 811.22 s	13.52	211.127			0	1596	0	72444	0	59696	47796	1636	42742	0	1440	2010	2368	0	0	1846	0	2014	1836	46770	30384	43894	46490	0
212.13507 Da 820.23 s	13.67	211.128			57850	47786	47648	0	43696	3510	2438	67134	0	63668	33484	67660	56708	58368	60286	79604	71178	106020	40180	0	0	90384	0	49472
212.17136 Da 855.72 s	14.26	211.164			8500	13668	7262	3198	8316	0	7990	14278	6578	9770	5142	72132	8114	18760	8502	13948	8104	37276	5550	8662	4418	58652	8254	13332
213.00329 Da 593.53 s	9.89	211.996	Indoxyl sulfate	C8H7NO4S	1860	8104	2322	47672	938	3176	748	8186	2386	8040	2428	133922	2550	17218	876	8096	3112	42134	1022	2754	2196	46676	1000	4234
214.05662 Da 717.02 s	11.95	213.049			9942	8786	8794	8752	10130	8762	7474	7958	7950	10076	10002	8308	9846	9178	10116	9798	9450	8204	9536	10004	9294	7096	9756	8856
214.11379 Da 662.59 s	11.04	213.107			2346	1772	1810	2678	2402	3432	2476	0	2820	2274	2214	3410	1966	1680	2688	1604	3492	3582	1646	3318	2978	2462	3122	3048
214.12478 Da 605.00 s	10.08	213.118			2216	2124	2460	0	2156	1904	1236	2142	368	2208	2546	2050	2264	2360	1638	2504	0	2278	2594	1636	940	2266	768	1786
214.15048 Da 791.85 s	13.2	213.143			9984	10520	9598	8262	9250	9286	9732	13538	7312	7300	9034	72618	11766	14618	9148	0	11278	23532	9802	9298	10598	45850	7762	11400
214.18690 Da 861.67 s	14.36	213.18			58922	118162	51762	2472	62804	67574	51478	136636	41686	95084	44280	74106	63062	88198	63734	106600	90654	89334	38244	79528	37480	72250	60872	83338
215.14619 Da 679.78 s	11.33	214.139			15610	6950	14814	2574	3210	2000	0	13510	1686	12106	6862	10514	12100	19116	5160	4656	7314	9150	17148	0	2474	14230	7492	11812
216.05229 Da 783.67 s	13.06	215.045			2602	1326	1798	1292	1118	1264	1818	1580	1584	1744	1464	1344	1622	1674	1512	2154	1648	1872	1598	2484	1560	1940	1726	1722
216.09342 Da 615.97 s	10.27	215.086			6706	6482	6088	2428	6070	4040	8750	6372	4180	7168	5700	6178	5104	6276	6108	6204	6446	6078	6312	9288	3002	5918	9116	8268
216.12938 Da 691.55 s	11.53	215.122			2518	1704	1870	2576	0	13538	10528	3076	9846	2848	2998	0	2078	2674	2670	2710	9710	2312	2460	9686	2480	0	12968	11716
216.13020 Da 672.70 s	11.21	215.123			3318	8050	7240	0	0	2690	2614	11104	2722	0	10806	15368	7840	8566	2128	11562	0	13542	10338	2702	2402	15704	2880	3002
216.16588 Da 765.05 s	12.75	215.159	12-HYDROXYDODECANOIC ACID	C12H24O3	10048	9832	8750	0	10756	0	11308	11588	9462	8354	11442	11190	8480	10158	11190	12754	11166	10726	9690	11544	0	12670	11306	12414
218.06432 Da 685.61 s	11.43	217.057			0	1152	320	0	1186	0	3524	5562	3670	3050	4124	3406	596	2348	3738	380	5518	1880	4912	2726	1076	3898	8148	3854
218.10891 Da 629.26 s	10.49	217.102			2746	2404	2990	1914	2900	3978	3588	3046	3574	3282	4078	2974	3242	2592	2794	2824	3276	2738	3148	3390	1694	3472	2934	2850
219.95065 Da 155.59 s	2.59	218.943			3036	3304	3494	0	2926	1964	1784	3466	2924	2830	3286	3104	2518	3784	3300	2460	3114	2514	2696	2628	1536	3166	3256	2840
220.13997 Da 809.81 s	13.5	219.133			2128	2160	2346	1192	2218	1544	1280	2324	2150	3350	2430	410	2178	1918	1638	2080	2274	2952	2170	2348	1102	7296	1700	2010
221.14725 Da 776.54 s	12.94	220.14			2452	6100	3016	6598	2786	1964	1436	3694	1132	1684	1192	8544	1610	3544	1226	2462	1644	5624	1316	1452	1498	6420	2060	4062
222.08278 Da 704.98 s	11.75	221.076			3764	5110	3134	0	3658	0	3392	3328	5396	3556	4580	4914	3840	3972	3556	6106	4542	0	4190	4190	0	3820	3116	4852
222.11914 Da 732.41 s	12.21	221.112			7066	5610	4442	5742	5264	0	7110	6522	7242	6728	8256	11482	3476	5292	5644	6808	5620	0	5216	6208	0	5948	5892	6182
222.15523 Da 777.59 s	12.96	221.148			20168	43634	19112	0	19102	0	8538	20312	6814	9838	7184	57094	8942	23168	8560	18354	12646	42494	7858	11380	10640	47166	10508	25334
224.02606 Da 803.22 s	13.39	223.019			0	0	518	8374	0	8954	11132	0	10710	0	0	0	0	0	1100	0	0	0	0	0	11946	0	11098	0
224.02693 Da 811.50 s	13.53	223.02			11100	12346	12706	0	15490	6306	0	20722	0	12514	9446	19330	12018	11788	21184	13854	14858	17322	10516	14688	0	9546	0	8922
224.17091 Da 852.12 s	14.2	223.164			8126	12346	6956	8922	6326	8128	5878	11850	5702	9802	5790	175798	7490	23478	6876	21556	8444	45462	5250	7366	6210	144714	8078	7642
225.91921 Da 692.92 s	11.55	224.912			2290	3012	2254	828	2048	0	0	4556	2698	2944	2778	3620	3910	3060	4192	3244	2810	2216	3230	0	0	2718	3658	2474
226.11359 Da 698.54 s	11.64	225.106			7716	7358	6896	4126	7836	3192	3018	7208	0	7358	6752	7084	7332	5968	6740	7938	6328	7502	7732	0	3298	5730	0	7212
226.16132 Da 603.36 s	10.06	225.154			3746	3094	3588	2172	3514	3394	3798	2694	3902	3530	3738	3390	3774	3360	0	4012	2812	4240	4580	2880	3734	3338	2858	3434
226.18667 Da 873.43 s	14.56	225.179			28074	44506	12818	6940	14828	7460	0	41712	0	26008	8536	233484	12330	66880	16362	32728	18236	136484	7230	12404	1878	603332	4734	59236
227.18165 Da 797.15 s	13.29	226.174			38878	23976	30266	3284	8058	1460	32590	50784	2434	23672	14258	15462	34048	40702	4202	15690	12222	16542	34710	21498	7398	17174	5882	24036
228.09255 Da 591.53 s	9.86	227.085			2024	1792	1710	2154	2032	2716	1990	1922	2430	2086	1920	2082	0	2420	1750	1924	2068	1790	1910	2082	1812	1900	1934	1986
228.09286 Da 649.06 s	10.82	227.086			4228	0	3686	1314	3208	2084	2138	2366	0	2098	1594	1700	1426	1310	2312	1986	2036	1560	1902	2302	1450	1184	2032	1622
228.12934 Da 688.61 s	11.48	227.122			4634	3722	3586	3640	4002	3486	3764	6716	0	0	7234	9990	4182	6302	0	5714	5638	5774	0	3476	3776	10866	0	6962
228.16558 Da 781.92 s	13.03	227.158			9878	7870	10388	8500	6916	8102	10558	9636	7956	7860	6170	11062	7702	9094	6426	7484	8640	9346	8368	14332	9622	10814	8356	7134
228.20184 Da 929.23 s	15.49	227.195			11376	157462	0	256718	10800	211704	10998	206530	6996	93390	2632	54358	41200	128170	9634	43606	3866	0	3404	102808	86990	55660	20138	29394
228.20188 Da 913.29 s	15.22	227.195			75164	14896	4802	46970	36078	0	81820	54484	67114	0	4982	30366	0	366550	0	0	9036	9644	0	198950	26176	14224	76384	137102
228.20246 Da 900.43 s	15.01	227.195			0	449162	43652	36192	49244	26990	49748	368078	21994	196834	46320	1505138	96922	0	62078	224980	73746	307906	45034	22182	18512	969354	13812	36082
229.16166 Da 709.51 s	11.83	228.154			13476	6876	15172	9636	7558	7444	8488	14516	3162	10792	6926	13352	8336	9342	5468	8358	6352	8626	15916	0	9030	8130	0	12330
229.93216 Da 127.52 s	2.13	228.925			3862	4862	4014	3798	3716	3290	2996	3776	3356	4014	3842	3962	3982	3760	3888	4254	3922	3728	3640	3554	2948	4108	3406	3580
229.93223 Da 157.17 s	2.62	228.925			1884	2358	2162	740	2010	1182	1340	1970	1090	1920	1670	1600	1952	1560	1574	2478	1814	2434	2012	1788	1078	1396	1638	1706
229.93242 Da 234.89 s	3.91	228.925			3206	3586	3430	234	3696	1876	2740	3646	2198	3602	4088	3306	3048	3682	2984	3766	2834	3180	3470	2864	280	3650	2500	3416
230.09902 Da 816.62 s	13.61	229.092	Naproxen	C14H14O3	2950	1982	3068	1184	1868	2428	2452	818	1858	2410	2608	3010	2382	2514	2298	1546	2690	1148	1712	1784	1318	494	1614	1532
230.10847 Da 602.08 s	10.03	229.101			2428	2090	2120	2406	2140	2482	2028	2450	1960	2428	2422	2388	2274	1812	2032	2182	2538	2246	2048	2182	1982	2612	2336	2690
230.14502 Da 732.37 s	12.21	229.138	Dodecanedioic acid	C12H22O4	18600	15468	14886	3300	14376	0	12166	14844	9418	19724	17554	21126	13398	13222	15718	17492	14544	24954	12654	10784	8694	15648	11206	13870
230.18129 Da 833.14 s	13.89	229.174			109516	114092	164828	2018	136390	28468	54560	180278	44610	107826	141220	175824	164066	168452	125666	170052	133344	303308	154304	64942	14706	130290	73966	111072
231.99729 Da 639.68 s	10.66	230.99	Vanillin-4-sulfate	C8H8O6S	32200	452	8818	410	16164	0	10454	40526	13870	16918	15644	72440	11988	25280	9250	11790	14738	19818	12940	18718	0	77874	10302	20338
234.12964 Da 702.73 s	11.71	233.122			7572	0	0	10020	0	1756	0	0	169822	5024	11406	0	838	15604	0	3066	1366	3178	0	0	0	1252	926	0
234.16210 Da 791.43 s	13.19	233.155			8776	1670	2220	397796	7810	308208	831862	33260	3566	12922	26374	97326	2774	5904	9670	700	14266	25132	27500	14490	342238	48638	7042	3652
234.16562 Da 809.86 s	13.5	233.158			0	16940	14946	1201254	1483942	1897382	2000676	0	0	0	0	0	26874	936556	0	10948	0	7430	0	1776346	1642016	0	2016660	1422148
234.16615 Da 821.55 s	13.69	233.159			2936046	2269976	2426954	583302	2417074	2179852	170956	1769742	2219018	2961762	3548570	1300736	3162010	1804928	2308906	1952536	2116242	678116	4071572	1706340	0	1888998	1985842	1562976
237.10566 Da 777.11 s	12.95	236.098			33448	78226	31602	0	34318	0	13892	34764	10414	18668	12352	97518	14814	38274	14684	32882	25060	68884	15598	20726	18632	75574	19042	47694
238.02161 Da 729.67 s	12.16	237.014			2562	2352	1740	332	2484	0	2728	1240	1668	2704	1706	1880	1838	1880	2842	1906	1816	1658	1602	1690	0	1820	2332	2460
238.11299 Da 726.52 s	12.11	237.106	4-O-methylolivetolcarboxylic acid	C13H18O4	15994	4722	11804	0	8160	7396	11656	6026	12634	15454	12500	6266	8720	6938	10264	5468	17982	7510	7938	15022	14762	6616	14156	9242
239.88477 Da 155.27 s	2.59	238.877			1458	1982	1848	1646	2388	1738	1852	1590	1816	1788	1528	1798	1738	1704	1736	1608	1904	2334	1874	1778	1880	1672	1590	1522
240.06017 Da 812.65 s	13.54	239.053			5598	5098	5108	4930	7472	218	5952	9972	5718	6060	6446	9432	6622	6874	11618	9948	8516	8416	4290	8740	6144	5776	0	4598
240.06755 Da 766.22 s	12.77	239.06			13334	10644	9566	1090	11698	14010	11706	9896	0	11878	11566	7838	10890	12550	8614	10728	10564	7308	8956	13538	494	8664	14140	11576
240.09150 Da 667.25 s	11.12	239.084			1834	1116	1444	2564	1516	2200	1832	1386	2160	1328	1276	1480	1900	604	1872	1282	1748	1234	1426	1672	2064	1312	1400	1800
240.09269 Da 718.11 s	11.97	239.085	CMPF	C12H16O5	1032	0	0	0	0	0	686	6654	1188	2270	848	19138	2664	9946	1444	11886	0	81512	4578	768	0	82926	1712	2964
240.12862 Da 791.96 s	13.2	239.121	L-Homocarnosine	C10H16N4O3	46904	47448	41280	68336	41268	23316	43526	44344	34740	33036	27986	104788	35496	47238	38658	55338	31710	51812	31512	36142	43024	54760	46246	38350
240.16514 Da 811.71 s	13.53	239.158			48314	62428	35616	17166	28398	30810	37074	58710	40330	57152	46456	0	44740	32796	36012	48128	42728	74674	55344	35896	21608	61628	44416	37438
240.20151 Da 903.44 s	15.06	239.194			6018	6606	1426	8472	3660	10210	5548	4774	0	8684	2088	2328	2234	9914	3338	0	6750	0	1790	7876	0	17252	6000	20332
240.20205 Da 889.64 s	14.83	239.195	7-_2-hydroxypropan-2-yl_-1,4a-dimethyl-2,3,4,5,6,7,8,8a-octahydronaphthalen-1-ol	C15H28O2	0	15308	3610	3002	4844	2984	3650	12724	3690	7824	3180	35212	5638	12354	6526	9560	0	15764	3250	2550	1480	33552	3230	6406
241.91482 Da 713.68 s	11.89	240.908			5412	4242	5196	0	4036	0	3458	4158	3230	4704	5332	2600	3948	5122	4228	3988	4924	2148	4966	3856	0	1732	4682	4232
242.10810 Da 659.08 s	10.98	241.101			5406	4502	4768	4208	5176	3950	5006	4992	3866	3852	4754	3372	4014	4422	4510	4418	4042	3066	4130	3734	4494	3038	4690	4056
242.14459 Da 762.30 s	12.7	241.137	_Z_-2-octylpent-2-enedioic acid	C13H22O4	13090	15122	12964	5016	12984	4810	0	14732	4196	12924	13470	14736	12540	12726	15210	14862	13092	14378	13156	15058	4720	17140	11092	14632
242.21748 Da 903.42 s	15.06	241.21			31364	66654	25904	7370	26316	46644	10240	49196	12142	54328	19470	78806	26112	53012	33482	49214	44386	64626	17972	0	22856	85912	34852	64108
243.17625 Da 739.08 s	12.32	242.169			317670	148338	247184	26804	85970	25932	778124	392082	40054	364386	163966	143284	303244	499136	67990	96136	182148	235646	368146	449574	21050	280714	122148	267224
243.17639 Da 718.91 s	11.98	242.169			24628	16842	10368	0	24018	0	0	16248	23770	19500	12306	11828	15192	16382	17246	14488	19402	12546	11432	25298	0	13394	21426	21818
244.12383 Da 679.29 s	11.32	243.117			23076	22384	17914	2686	20938	2744	3270	22974	3166	24592	19274	19602	19072	19888	22838	25374	18906	21850	22426	0	2658	17130	26828	23258
244.16038 Da 736.78 s	12.28	243.153	Tridecanedioic acid	C13H24O4	14118	16186	15570	3670	10896	5518	5110	29158	5208	20424	15240	37264	16028	22000	13528	18306	16032	23364	18604	5678	4292	27724	6674	16376
244.17148 Da 652.94 s	10.88	243.164	Isoleucylisoleucine	C12H24N2O3	864	0	3344	9136	640	0	654	1376	506	1104	624	20278	478	442	442	754	712	57176	420	0	508	88458	582	0
244.19619 Da 849.06 s	14.15	243.189			7672	8788	8270	12476	9766	6678	8586	11932	6228	9534	8240	9176	7334	9954	10462	12418	10012	15078	5858	6702	7790	20008	7812	8108
244.19651 Da 807.17 s	13.45	243.189			8666	8944	11828	9378	8610	9504	7736	12482	8570	10434	8390	30418	9052	12314	8354	14044	10966	13202	10906	9640	7778	21432	12276	8262
245.90802 Da 747.26 s	12.45	244.901			0	366	0	0	472	1236	686	4380	1552	4958	650	23948	510	8610	0	4252	2142	14798	746	2756	778	14456	716	3014
246.04898 Da 690.60 s	11.51	245.042			11432	7290	1720	1372	5926	0	296	0	12764	28752	4016	148160	5098	19598	1850	28350	1296	7198	4578	5222	0	113882	5774	20140
246.09875 Da 624.38 s	10.41	245.091	N-acetyltryptophan	C13H14N2O3	2834	2756	4454	1278	3684	0	0	4132	1410	4148	3634	3278	3426	3248	2752	4188	2932	3576	3962	0	1172	3702	3248	3236
246.10297 Da 578.79 s	9.65	245.096			1998	2114	1936	1862	1924	2246	1696	1892	1812	2470	1756	1786	1920	1786	1898	2016	2038	2476	1544	1656	0	1808	1798	1858
246.13932 Da 689.10 s	11.48	245.132			2224	2616	2108	0	2336	0	2262	2942	2188	2460	2480	3062	2376	0	2284	2444	2782	2522	2216	0	0	2584	2562	2930
247.89774 Da 133.77 s	2.23	246.89			2866	2476	2154	4234	2638	3726	2662	2868	2046	2772	3024	2770	2558	2888	2896	2828	2076	2614	3068	2244	2916	2750	2378	2598
247.89790 Da 232.23 s	3.87	246.891			5296	4482	4818	1256	4064	2660	3422	4132	3516	4268	4080	3858	4176	4456	4012	4544	4164	3928	4084	3972	1048	4780	3856	4908
248.11857 Da 607.97 s	10.13	247.111			3150	1846	2200	908	2032	1120	2752	2624	3306	2548	3580	2310	2010	2540	2802	1774	3156	2578	2460	2956	0	2166	2640	2208
248.13414 Da 771.56 s	12.86	247.127			0	672	390	1208	826	1164	0	0	1660	2050	3456	5608	1356	2906	2444	0	2918	1894	2744	1526	1168	3496	0	1652
248.15079 Da 711.48 s	11.86	247.144			16428	2806	2318	878	2786	0	1606	2300	481118	6208	16900	2848	2124	40556	2006	3438	2034	5588	2794	1614	1998	7664	1610	2096
248.16969 Da 860.02 s	14.33	247.162			1332	1198	0	5576	1844	3426	1854	0	1702	3234	0	11256	914	4340	2152	1654	1502	2750	308	2058	2166	6396	1780	2526
248.17015 Da 757.98 s	12.63	247.163			3158	3892	1244	3382	0	3004	1426	3660	1456	2164	1556	4928	1956	0	1520	2662	3094	3792	1234	2038	630	4034	2542	2944
249.83751 Da 147.37 s	2.46	248.83			2866	2044	1934	1296	2276	1920	1770	2154	2254	2368	2790	2388	2430	1290	1948	1784	1916	1572	2414	1902	1894	2510	2116	2334
249.89511 Da 231.45 s	3.86	248.888			1824	1660	1654	218	1630	1078	1252	1592	1214	1294	1644	1642	1640	1904	1398	1712	1552	1486	1350	2164	186	0	1466	1598
249.91340 Da 154.72 s	2.58	248.906			1520	1452	1860	386	1596	1270	1318	1686	1420	1630	2158	2082	1768	1972	1940	1820	1442	1472	1794	1682	950	1668	1364	1522
250.14962 Da 791.45 s	13.19	249.142	8-hydroxy-11-_hydroxymethyl_-1,5,11-trimethyltricyclo_6.2.1.0_,_undec-2-en-9-one	C15H22O3	37716	41950	31798	35052	29914	14306	36300	35344	20396	23440	27342	43370	36098	35962	23722	31546	23748	34248	26368	36806	21296	28910	27522	30834
250.14964 Da 812.24 s	13.54	249.142	8-hydroxy-11-_hydroxymethyl_-1,5,11-trimethyltricyclo_6.2.1.0_,_undec-2-en-9-one	C15H22O3	64620	86370	23894	49232	24670	65122	31524	86770	44430	95960	19296	52034	30986	43368	52492	60968	51330	94332	20864	48190	28306	38506	53740	46960
250.18572 Da 867.55 s	14.46	249.178			948	3516	678	6794	762	0	942	6328	646	2140	558	62010	938	10372	730	4564	838	12128	510	1158	574	62098	502	1404
251.14474 Da 878.92 s	14.65	250.137	2,6-Di-tert-butyl-4-nitrophenol	C14H21NO3	5872	29966	3836	28386	5586	17174	6194	16206	6428	9812	4478	58446	4922	21318	5180	12878	8594	31942	4312	6322	0	63100	6404	31064
251.83373 Da 146.95 s	2.45	250.826			2866	2044	1934	2100	2276	2228	1770	2154	2552	2368	2790	2388	2430	2524	1948	1784	1916	1628	2414	1902	2352	2510	2444	2334
252.09535 Da 764.83 s	12.75	251.088			3772	3060	2422	430	3336	0	3144	4330	3048	2310	3920	3050	2348	3006	4390	3090	2670	2866	3728	4064	0	2748	3084	3044
252.12833 Da 775.75 s	12.93	251.121			2440	2574	1782	4544	2326	2552	2372	2116	2066	2908	1706	3164	1928	2574	2682	2314	2468	3276	2020	0	2818	2200	2656	2700
252.16479 Da 774.96 s	12.92	251.158			10294	14708	12492	0	6998	0	3628	3198	3370	3536	3558	0	3966	3802	3644	4184	3550	3608	4810	3546	4746	2930	3180	5082
252.20167 Da 889.79 s	14.83	251.194			0	6542	966	2596	1200	0	1050	6844	1230	3434	934	66058	1324	0	1940	3630	2008	9146	1068	1438	0	96470	968	0
253.02088 Da 728.52 s	12.14	252.014			5008	3652	3806	0	3684	358	0	2892	372	4004	3836	3380	3522	2854	3774	3786	3574	2942	2992	464	0	2906	390	3972
254.14416 Da 751.50 s	12.52	253.137			106154	116110	91440	6950	126148	6208	132490	135954	120042	113580	111310	159748	121626	146788	135760	145286	115586	171392	108796	120484	2970	151748	159040	142348
254.18002 Da 798.44 s	13.31	253.173			2398	2408	2650	2084	2798	2492	1954	3606	2582	0	2026	2272	2866	2992	2550	2760	2124	2542	2354	2512	3006	2084	2316	2554
254.21745 Da 911.94 s	15.2	253.21			2534	89868	71900	3478	34420	2610	3110	175542	3836	0	61326	2212206	60144	4216	23054	115086	12140	153136	69582	3734	3374	1055370	2476	3240
256.06849 Da 725.85 s	12.1	255.061			2674	1368	1608	1674	2002	3102	2798	1616	2210	2482	0	1584	1560	0	0	2670	2294	1794	538	0	1436	1620	2452	1704
256.08730 Da 601.19 s	10.02	255.08			712	920	750	978	660	0	0	6822	686	0	760	3474	1050	2678	2764	11914	1026	6032	840	740	580	6874	0	0
256.12148 Da 677.07 s	11.28	255.114			3018	2174	2410	0	2632	2232	2828	5482	2562	2178	2514	20360	2288	4976	2778	8040	2180	4530	0	2492	2894	33690	2492	2884
256.19605 Da 804.30 s	13.41	255.189			24590	29070	24900	17792	24914	19332	23978	35676	20516	25884	24364	28746	23570	18202	23418	29884	20128	28064	25076	28722	24844	30584	32402	20826
256.23204 Da 1013.14 s	16.89	255.225	Ethyl myristate	C16H32O2	39702	62236	45318	1702970	36704	76104	73018	87024	55944	63794	28584	107352	42032	142372	42462	37366	42508	37790	32696	102716	69856	57664	51352	46414
256.23226 Da 980.20 s	16.34	255.225	Palmitic acid	C16H32O2	470600	0	0	498550	185270	68854	603742	1569512	231130	719878	0	170106	0	1037266	0	366164	192494	0	0	1236492	0	181488	578808	560052
256.23229 Da 990.00 s	16.5	255.225	Palmitic acid	C16H32O2	224458	1401476	48126	374970	82776	805778	596794	1291534	386982	804604	45280	367504	580998	539434	63536	363726	49744	381362	38980	879600	596196	437842	387304	81080
256.23244 Da 947.72 s	15.8	255.225	Palmitic acid	C16H32O2	55184	2505912	494098	69002	29448	59352	60138	2370352	66672	25864	536612	2560500	798436	57322	43120	856512	186212	887068	548494	62442	80980	1973406	65156	69386
256.23248 Da 966.17 s	16.1	255.225	Palmitic acid	C16H32O2	561890	0	42974	0	434458	51064	20668	0	0	1448512	50618	893504	101968	1870102	538416	65096	391480	0	44384	101234	67322	174874	390528	27152
256.23301 Da 922.29 s	15.37	255.226			45920	68166	57938	33606	37720	26080	17542	80968	31844	57122	48602	65142	60382	23486	28066	68094	32048	70978	56268	30888	30488	38818	52996	33550
257.19123 Da 765.56 s	12.76	256.184			3936	0	4570	0	2424	1080	7674	5186	1272	0	0	2402	0	5240	1530	1848	0	2644	4614	6658	0	3894	1568	3228
257.85040 Da 149.35 s	2.49	256.843			2764	3462	2794	2766	3158	3276	3322	3418	2582	2752	3432	2616	2666	3282	3290	3018	2634	2852	3040	3244	3106	2812	3132	2930
257.92637 Da 155.79 s	2.6	256.919			2136	2516	2298	652	2708	1284	1632	2266	1860	2318	2306	1996	2334	2082	2320	2214	2010	2312	2388	1956	884	2092	2386	2646
258.10252 Da 655.30 s	10.92	257.095			7112	1520	8688	1234	7532	0	0	8368	8298	7920	8212	7056	6676	7276	9160	7442	6846	8202	8186	8942	0	7378	7670	6492
258.15425 Da 860.59 s	14.34	257.147			6936	24328	4762	3944	4018	2322	2322	0	1934	2672	2144	1838	3544	6976	1262	1890	2080	2366	7586	9270	3832	3446	2948	4642
258.17530 Da 812.70 s	13.55	257.168			12694	19240	9162	8918	13372	8178	10068	21628	8448	11474	10822	35514	13860	18398	9702	9722	8882	17522	12332	9534	9064	17940	10332	9140
258.21166 Da 821.87 s	13.7	257.204			7104	6120	5852	5966	6078	4834	4288	6942	5870	7178	6332	8224	7960	5644	5504	6216	5924	7872	7298	6972	5408	9480	5420	5266
259.84738 Da 148.73 s	2.48	258.84			3050	2492	2640	2738	2642	2952	2818	2856	2674	2836	2864	2062	3166	3286	3016	2564	3338	3312	2738	3066	2624	3110	2968	2788
259.94207 Da 155.72 s	2.6	258.935			1920	2090	1868	594	2092	956	1052	2042	1416	1864	1884	1828	2098	2194	2148	2156	1666	1628	1934	1818	698	2012	1760	1726
260.02768 Da 703.00 s	11.72	259.02			12420	13460	7474	0	10816	0	8300	11808	6522	5418	7452	11388	8204	4572	4764	2346	17408	6992	4024	3188	230	23300	6882	8876
260.11761 Da 656.93 s	10.95	259.11			2848	7744	2160	13982	2658	14126	14368	9930	15686	3482	2446	7708	7356	7402	6540	2258	6994	9038	9442	0	14224	8948	6256	8658
260.11826 Da 640.81 s	10.68	259.111			13092	0	12678	2306	12194	2448	0	10426	0	16192	12498	8754	13364	13516	13440	11802	12708	13618	12690	0	2060	11270	14926	13794
260.15458 Da 702.26 s	11.7	259.147			0	1338	1152	2046	2216	0	0	8668	4594	4602	5924	10176	3146	7022	4334	5582	4580	3680	5746	0	2090	7776	4608	0
260.19041 Da 789.44 s	13.16	259.183			1582	1464	1926	0	2054	3948	3898	9866	4784	4128	7630	11910	4288	6082	5012	6044	4728	3858	6834	4952	7014	12704	5922	7716
262.13365 Da 648.53 s	10.81	261.126	_2R,3R,4S,5S,6R_-2-_Z_-hex-3-enoxy_-6-_hydroxymethyl_oxane-3,4,5-triol	C12H22O6	9780	0	5020	2470	8914	3334	20054	18736	17896	10770	23368	8148	10114	12826	13828	8666	18912	5738	15542	16902	2094	6340	18230	13716
264.10330 Da 595.22 s	9.92	263.096	Phenylacetylglutamine	C13H16N2O4	1172	8578	1178	302	1852	264	752	4342	1136	2446	1144	31544	1218	4136	742	3296	784	12080	460	958	186	20284	838	3392
264.14833 Da 635.52 s	10.59	263.141			5204	1024	3720	0	4116	0	3762	0	0	3848	3006	3728	3176	4144	4254	0	4556	3506	4256	0	0	18668	3722	2796
264.16439 Da 823.32 s	13.72	263.157			2682	8408	1760	22224	3276	4322	3450	4772	2320	4456	1988	15014	2056	5472	3230	0	4668	12228	3078	3536	3508	7664	2180	3838
265.15739 Da 740.12 s	12.34	264.15			7466	3352	5228	266	2318	364	12072	5640	962	5164	2396	1914	5686	7332	1292	1450	3052	4272	5950	6416	1284	2684	2256	4702
266.10691 Da 798.26 s	13.3	265.1			0	1134	852	4866	0	10386	17352	0	11012	0	462	0	956	0	0	0	0	0	0	12676	2062	0	4506	0
266.10770 Da 806.21 s	13.44	265.1			18666	19356	13986	0	7594	1456	0	22008	0	14312	6198	30810	8992	23088	24230	27602	26298	32684	11248	0	546	32636	0	21900
266.14709 Da 831.80 s	13.86	265.14	STROBILACTONE A	C15H22O4	241210	175226	138680	6736	154564	214042	241702	283306	172654	195574	131336	381166	236724	201782	156128	210790	224372	396110	213656	176536	170718	192148	155706	170924
266.17920 Da 830.74 s	13.85	265.172			936	1908	1490	4254	1680	650	514	2016	1624	1572	718	0	1392	1792	954	2718	1954	5432	390	1284	0	6592	1704	1064
267.08788 Da 571.89 s	9.53	302.057	Adenosine	C10H13N5O4	428	2620	7900	168	308	196	322	226	182	208	162	282	6100	198	4148	400	248	0	5552	2954	6228	212	2408	478
267.80296 Da 145.28 s	2.42	266.796			9878	13072	13772	5622	12504	8086	6664	13302	12974	10392	15338	15026	11800	13658	10614	11136	10264	9216	11020	8580	5026	15562	12518	9338
267.80334 Da 914.48 s	15.24	266.796			10652	8474	6058	2340	11602	6026	4124	8024	6392	9650	12186	1776	10172	6180	10914	8522	7082	2774	9492	8408	7092	0	7674	6748
267.87868 Da 148.69 s	2.48	266.871			1520	1314	1676	1632	1462	1890	1326	1648	1516	1178	1804	1812	1404	1364	1290	772	1154	1046	1130	912	1632	1320	1522	1168
268.07268 Da 514.47 s	8.57	267.065	Inosine	C10H12N4O5	33164	12790	1758	31064	23678	18868	0	10340	16070	7702	23190	15298	2490	13136	512	5362	9012	3864	768	968	5304	12258	538	11060
268.12326 Da 775.20 s	12.92	267.116			1212	33956	1316	386	1218	0	0	42734	1290	12602	1504	270868	1864	24288	1180	72800	4768	234008	2562	0	0	251564	0	9952
268.15709 Da 858.83 s	14.31	267.15			3540	4828	2744	3254	3428	5834	3672	5494	2858	2776	2926	7856	2318	6234	4428	4916	4226	10024	1260	5022	0	0	4638	5566
268.15884 Da 772.74 s	12.88	267.152			3166	0	2228	3094	2238	1642	2046	1934	1976	2478	1324	3936	2082	2136	2384	2788	2652	2338	2504	2326	1676	3212	2030	2460
268.19565 Da 835.97 s	13.93	267.188			6304	0	2024	6554	5388	16046	13026	7724	12090	5052	3104	40502	2844	8180	7352	7366	10476	14334	4514	17412	18122	21540	10958	10350
268.23188 Da 962.06 s	16.03	267.225			3542	2644	1142	0	0	2826	5210	2440	4158	1426	0	6828	1494	0	4188	1696	0	1646	1504	5150	3474	4008	4564	5438
268.23262 Da 938.20 s	15.64	267.225			3238	11234	4778	1700	0	0	0	11968	0	5122	4338	128724	5296	14216	3506	5708	2712	7026	5220	0	1032	80656	1110	1270
269.19087 Da 740.77 s	12.35	268.184			3980	3028	3576	0	3482	4418	4114	3880	3202	3616	3210	3790	4480	3548	4192	3656	2850	3774	3308	4738	0	3036	3136	3224
270.12984 Da 807.03 s	13.45	269.123			31958	32196	37722	24892	29990	29564	22706	41900	29398	39056	26018	32424	39480	42064	26080	30518	30626	32286	39588	33040	21288	39152	24630	21194
270.13849 Da 745.62 s	12.43	269.131			6312	7208	6784	0	7026	0	8714	8766	9270	11632	7820	13596	6842	9118	8004	10292	7800	10516	7292	7768	1412	11754	10640	10464
270.17510 Da 765.33 s	12.76	269.168			3262	3708	3076	3562	2892	2520	2500	3534	3174	3840	4136	9176	0	3984	3482	4652	3212	6206	3482	2912	2672	10120	3176	4118
270.21131 Da 829.97 s	13.83	269.204			33704	35302	24982	0	29764	41262	41588	44598	30688	37602	32494	77328	32128	31704	36150	42992	38570	78122	34640	40952	51896	56960	28608	32796
271.20725 Da 786.88 s	13.11	270.2			21828	9988	20946	7716	3870	4024	44520	28386	2366	19308	9242	9072	21066	36158	4950	5284	12914	10452	23820	37890	8530	17482	6482	15620
272.07524 Da 580.50 s	9.68	271.068			0	0	320	0	0	0	176	3136	482	2874	562	21660	548	9134	0	8804	282	16156	0	0	142	31408	0	660
272.11755 Da 609.47 s	10.16	271.11			2444	1908	1692	1462	1728	1978	2400	2346	2430	2144	1860	1900	1898	1986	1784	2396	1982	1642	2290	2288	1100	1834	1978	2508
272.15388 Da 685.60 s	11.43	271.147			1824	1484	1482	1956	1530	2536	2286	2634	2764	2032	2954	3394	2262	2836	2224	2152	2340	1970	2578	1878	2474	0	2882	2388
272.19102 Da 781.56 s	13.03	271.184			3106	5892	4600	5102	2766	2366	3664	5618	2072	2888	5368	16442	4882	5674	3506	7716	4646	8630	4942	3234	2220	13398	2896	4374
272.22679 Da 837.90 s	13.97	271.22			50776	58146	47142	75164	63480	74024	61534	95180	50302	46594	34956	168594	41512	76592	57190	85022	58864	122136	35194	82286	65406	125022	59404	71084
274.09689 Da 633.57 s	10.56	273.09			7208	1574	5622	0	6892	3636	7566	7462	0	8790	5810	6162	6728	5866	5708	6166	6010	6438	6862	6672	0	3714	6408	6752
274.13290 Da 665.15 s	11.09	273.126			4286	3550	4006	2528	4834	5932	5278	0	4750	4062	5956	4424	1786	3920	4212	4550	4734	2086	4400	5012	4680	5958	4854	4190
274.13334 Da 621.11 s	10.35	273.126			3524	3906	2794	2058	3282	3898	4184	4730	4882	4522	7374	4932	3994	4780	4252	4604	3788	3286	5036	3378	4886	4898	5760	4684
274.16973 Da 712.98 s	11.88	273.162			1876	0	1112	1290	2086	0	0	6852	4712	3410	7818	5632	3750	5474	4396	4762	4928	3244	5726	4604	1966	6222	5146	5642
274.20619 Da 841.59 s	14.03	273.199			39978	83476	99982	0	63148	7566	18924	92472	15334	48740	57214	90618	57694	54752	43738	110568	41750	110568	60256	18518	3842	66384	30906	30746
276.10488 Da 613.44 s	10.22	275.098			0	0	0	0	0	1600	0	2356	0	0	0	14220	0	3666	0	4992	0	60004	0	0	0	51682	0	0
276.14880 Da 682.62 s	11.38	275.142			1930	1486	1254	1804	1682	2740	3372	2884	2832	2958	5484	2420	2018	2300	2856	2328	3386	1848	2800	2604	0	1870	3028	2658
276.16435 Da 801.07 s	13.35	275.157			2578	9318	5350	2864	2776	0	4578	4550	2594	4634	3798	7262	5032	6798	3772	6454	4328	7390	3590	3888	0	8286	3148	3186
276.16612 Da 850.92 s	14.18	275.159	shogaol	C17H24O3	1448	1268	2194	1402	1922	2200	9222	8804	3914	1636	752	3182	1534	1944	2358	1698	1616	2346	906	2472	1218	1184	3560	2526
276.20004 Da 883.97 s	14.73	275.193			1460	4548	892	0	1236	0	0	7214	164	3756	1006	34030	926	6042	1628	4516	1862	6674	892	0	1072	30420	1204	414
277.90761 Da 154.11 s	2.57	276.9			1730	1526	1350	0	1696	1298	1198	1728	1680	1536	2118	2094	1586	1736	1608	1420	1428	1472	1390	1112	930	1824	1464	1508
278.08183 Da 610.08 s	10.17	277.075			2350	2994	2746	0	2330	2378	2302	2482	2516	2612	2556	2140	2430	2054	1940	2848	2056	3402	2608	2396	0	2638	2380	2154
278.12294 Da 662.56 s	11.04	277.116			14340	19012	21952	10372	15576	13290	13000	19780	12124	15810	17920	19168	20294	15566	12350	21474	11246	21056	18928	14570	10402	17344	13146	14114
278.12758 Da 594.16 s	9.9	277.12			2172	2590	2182	2474	1906	2316	1620	3310	1694	2142	2014	4666	2196	2346	1884	2592	1956	4002	2056	2244	1728	3770	1730	2416
278.14321 Da 797.04 s	13.28	277.136	Di-n-butyl phthalate	C16H22O4	9002	11114	10888	58300	278342	1848300	613444	1582288	955748	1209604	1395484	5997014	1450928	3898282	1772340	2542468	2053912	1042752	1433916	1311226	1125782	3027496	1160166	1713012
278.14379 Da 740.49 s	12.34	277.137			4116	5888	2082	556	5396	3412	0	4190	1750	0	1968	4902	2024	0	1506	2414	2156	3556	1274	2060	682	5446	1732	4434
278.15659 Da 686.34 s	11.44	277.149			876	716	2726	5962	524	1796	542	530	0	524	752	3298	0	0	850	374	0	23294	756	612	1316	89118	660	606
278.17975 Da 803.73 s	13.4	277.172			354738	640802	481084	240972	253408	108726	301480	400014	171240	263718	317466	657852	277714	268430	291974	342544	198620	541850	307698	243194	254486	484946	350848	185414
278.21637 Da 906.80 s	15.11	277.209	gamma-Linolenic acid	C18H30O2	0	25340	908	1060	1874	1970	652	46402	362	11738	906	1223016	1316	69470	3110	27642	2226	52906	950	450	316	1201928	0	0
280.16187 Da 845.82 s	14.1	279.155	_1R,2E,7R,10E,12S,13S,15R_-12,15-dihydroxy-7-methyl-8-oxabicyclo_11.3.0_hexadeca-2,10-dien-9-one	C16H24O4	8104	12268	9182	0	9150	17930	17588	15176	15440	9072	7034	8622	8848	13996	11056	12418	8420	13648	6526	17062	16838	5822	10820	10856
280.23169 Da 945.15 s	15.75	279.224	9Z,12Z-Linoleic acid	C18H32O2	18606	3612	3722	3616	14496	8630	3480	9828	10542	34772	2332	199450	2080	371060	18532	3176	13020	0	3018	28780	2042	58260	4132	0
280.23229 Da 928.83 s	15.48	279.225			1816	255028	11980	3990	2260	32020	3066	541204	3426	79002	12850	7489370	19142	0	0	146148	1664	190790	12338	2948	3418	4627176	1402	2082
282.17231 Da 862.52 s	14.38	281.165			2038	2586	1670	3610	2338	3440	1886	1534	1950	2264	0	3892	1654	3456	2602	2318	3124	3240	810	2238	2016	3722	2344	2626
282.21054 Da 843.90 s	14.06	281.203			1342	1474	1440	2152	1532	1342	1608	2078	1158	1458	1356	2100	1384	1568	1408	1918	1792	2080	1232	2184	1326	2138	1540	1530
282.24708 Da 1008.30 s	16.8	281.24			18060	51544	12828	17880	12326	143826	115066	59110	86972	36250	11588	2729902	14904	0	14744	18142	14102	15202	10510	133444	97192	184368	62624	122828
282.24732 Da 990.19 s	16.5	281.24			79936	16372	11086	10188	89996	7692	19676	23248	3992	143440	0	3975164	10364	533514	86704	11142	97380	12462	71534	7320	4152	1624254	6818	89686
282.24773 Da 965.28 s	16.09	281.24			6978	496192	121366	4544	13222	40510	13750	604048	11090	4238	121064	5277796	142032	13404	10706	204064	4718	201400	134728	11000	3996	1986230	9138	9552
283.08305 Da 523.31 s	8.72	282.076	Guanosine	C10H13N5O5	11022	3266	2280	10782	6312	5326	2302	2710	4236	3144	5016	4954	1528	5208	1200	2124	2918	2400	1884	988	3640	4424	1104	3242
284.09967 Da 775.77 s	12.93	283.092			3898	4162	5516	4000	3948	3694	4368	3846	3070	3426	4186	4334	5500	3614	4206	4222	4736	4428	4330	4280	2504	2402	2470	3996
284.10914 Da 797.39 s	13.29	283.102			73044	65674	57786	17488	10572	25146	64556	84634	17514	76094	38814	23926	66320	89116	16996	21866	70966	50978	45794	68016	51220	29056	55560	54262
284.11722 Da 684.72 s	11.41	283.11			5218	8638	3562	7114	3802	7580	0	6964	4294	4330	3602	16722	3652	7882	3848	5370	5564	13386	3972	4104	3430	12638	4846	7512
284.13650 Da 821.20 s	13.69	283.129			12812	7540	6358	2628	7548	4152	5074	9816	4806	8268	5092	6868	7422	5070	6448	8816	7522	9976	8552	8372	5520	7088	7236	5108
284.15311 Da 677.08 s	11.28	283.146			1452	1524	1256	0	0	2896	1796	2164	3330	1994	2166	9926	1964	4712	3336	3780	3138	2646	2300	2740	3016	2576	2790	2306
284.19018 Da 777.60 s	12.96	283.183			7686	7796	6682	8546	6696	4704	5626	7544	5596	6318	7620	0	7894	6790	8476	10630	7228	23050	6188	7544	6190	35910	5472	7678
284.22649 Da 848.75 s	14.15	283.219			4254	6174	4090	0	4450	5944	7360	7664	6114	3974	2382	6916	3142	5770	0	0	4616	7110	3208	7912	5352	5686	5394	0
284.26219 Da 1571.54 s	26.19	283.255			48534	47062	47128	81980	35584	41368	43236	49066	45020	50066	41580	30774	47678	40452	43280	40196	48816	40582	37286	115436	53180	26956	57526	41804
284.26236 Da 1093.98 s	18.23	283.255			46236	77508	47492	1048250	37640	102448	70030	81308	65818	55346	36284	72052	48836	76086	44558	44524	42956	45964	39596	72660	69290	39778	0	43808
284.26240 Da 1432.68 s	23.88	283.255			38400	47214	42882	48308	36242	46844	41540	55166	39052	45788	39466	44682	42188	42582	40572	40114	49384	45600	38650	43654	60662	33880	52386	42934
284.26242 Da 1550.23 s	25.84	283.255			36618	48026	44964	61584	37754	50938	43652	51486	40668	46370	40228	31370	47998	43560	43184	41628	53200	46238	40288	109402	59994	32322	59286	45560
284.26244 Da 1503.04 s	25.05	283.255			46134	49144	38882	55416	30176	43242	41570	56258	43116	48464	35032	28580	44202	50544	43206	41608	43418	47120	40780	46336	74904	40030	57712	45656
284.26254 Da 1596.47 s	26.61	283.255			50396	50822	48988	125162	35560	39496	46072	54930	41348	54752	40070	25280	44344	39018	51514	47124	74760	41636	40402	97862	58862	30642	66652	43806
284.26261 Da 1073.47 s	17.89	283.255	octadecanoic acid	C18H36O2	51214	0	45744	0	0	148792	461922	121584	440246	80404	46310	256302	340912	328054	57696	46132	52854	193182	42336	775698	415802	52304	99624	86358
284.26272 Da 1061.84 s	17.7	283.255	Stearic acid	C18H36O2	400364	684716	56342	122880	51258	133802	478256	794926	49372	434616	43518	0	379688	793824	301106	268162	71010	224176	44704	674272	51174	277414	294078	414434
284.26295 Da 1045.84 s	17.43	283.256	octadecanoic acid	C18H36O2	365484	0	61482	145406	389132	58698	41498	330152	38532	862590	48412	943628	108582	953210	462626	0	214786	0	57394	139478	65640	639142	42592	30664
284.26327 Da 1016.33 s	16.94	283.256			37062	1113256	363470	20386	33196	12708	16914	1205642	19908	31912	351270	36222	420912	35700	41564	571304	47518	548576	350524	17494	33852	25798	23454	51120
286.13192 Da 767.28 s	12.79	285.125			12258	2042	8642	15522	12210	12684	8486	12352	9040	8894	10934	9128	9818	10850	8464	12132	11166	8454	9312	10592	13078	9404	11568	11064
286.13294 Da 756.97 s	12.62	285.126			11766	13248	9142	0	12588	0	13518	14226	11812	13230	10616	10800	13986	13736	13404	13088	11030	14450	11090	13230	1618	11738	12030	10276
286.16942 Da 697.51 s	11.63	285.162			1880	2092	1846	0	2012	2560	2808	4260	2862	2532	4140	3814	3526	2970	2830	3790	4076	2892	4864	3434	3132	3796	3494	3092
286.20578 Da 798.58 s	13.31	285.199			12226	15116	10558	0	9954	16342	15536	14038	15976	12202	10864	69420	14120	18698	12556	19610	10760	38864	11596	12092	16434	49116	11188	11904
286.24197 Da 853.59 s	14.23	285.235			3578	5492	4166	5448	4354	6324	5958	7756	4978	5238	0	8962	4088	5324	4500	6940	4566	6722	0	5242	4488	5858	5686	6082
287.88869 Da 158.70 s	2.65	286.881			1940	2216	2086	1258	0	1586	1742	2008	1896	2260	1582	1556	1766	1770	1946	2358	2208	2470	1738	2160	1298	1528	1968	1850
287.88895 Da 133.44 s	2.22	286.882			1658	2068	2168	3332	2112	2314	2456	2360	1740	1694	2142	2374	2030	1930	1496	1966	1828	1930	1704	2014	2246	1736	1806	2066
287.88902 Da 230.08 s	3.83	286.882			2854	2880	3050	268	3358	1988	2682	0	2252	2848	2508	3028	2794	3138	2864	2724	3296	2366	2616	3066	206	2776	3054	2964
287.88943 Da 241.06 s	4.02	286.882			2896	3142	3000	572	2842	0	0	2820	2168	3334	2968	2682	2722	2586	2788	3048	3160	2904	3170	2370	740	2790	0	0
287.93606 Da 155.98 s	2.6	286.929			1680	1924	1754	302	1712	1128	958	1504	1672	1804	1772	1674	1494	1858	1884	1568	2098	1490	1654	1788	858	1444	1902	1802
288.18501 Da 770.28 s	12.84	287.178			2264	2796	2184	0	2204	3086	3576	2810	2922	2638	3064	2994	2212	2654	2104	2804	2530	2956	3528	2446	2452	2396	3112	0
288.22122 Da 790.45 s	13.17	287.214			15366	11986	12752	12808	12130	7898	15392	14614	14672	15024	11156	17568	13926	17536	17968	16986	18048	12568	13152	16828	16362	16026	11862	16616
290.12776 Da 594.07 s	9.9	289.12			2550	2562	2938	1982	2404	2442	2126	2666	2286	2446	2586	2966	2682	2424	2334	3468	2144	3086	2526	2362	1240	2798	2444	2826
290.16393 Da 630.24 s	10.5	289.157			426	0	0	578	1292	3140	2692	4504	3208	2754	5924	3700	3632	2808	3930	3290	2764	1880	4676	3032	4688	4046	3802	3708
290.20069 Da 763.74 s	12.73	289.193			3980	8202	7874	0	5056	732	1310	7590	1344	4490	8866	6482	7592	4884	4364	8466	2324	7412	6760	1726	644	7194	1814	2792
292.12216 Da 705.56 s	11.76	291.115			770	968	326	670	2732	14428	6490	16262	10188	9042	16514	15244	10390	13198	11556	12126	11778	5710	16812	10554	0	9612	16054	14758
292.14212 Da 655.87 s	10.93	291.135			2750	2312	3346	2978	3582	3748	3324	3440	3004	3506	3016	2374	2528	2968	3220	2854	3094	0	1702	3130	3758	2158	3724	3198
292.15841 Da 811.08 s	13.52	291.151			2350	1492	1962	1912	1610	1760	1928	4212	2272	1766	1078	2678	1524	3058	2072	1760	1926	7402	1804	2292	1608	1866	1956	1926
292.19817 Da 857.13 s	14.29	291.191			19248	21360	15494	3094	16596	12344	16006	19220	12132	10888	13636	21462	13980	16826	17486	20814	17008	21196	11190	14558	0	13342	12210	33126
294.13794 Da 719.76 s	12	293.131			524	1492	972	510	12380	0	0	65184	39214	23582	61346	64224	29040	45922	29776	32850	37590	15256	43656	28732	0	47436	40718	43344
294.14907 Da 612.52 s	10.21	293.142			0	354	946	2064	0	150	0	846	164	502	0	3678	238	884	178	916	442	14060	0	146	904	24186	218	246
294.17419 Da 778.21 s	12.97	293.167	Cinchonidine	C19H22N2O	303024	630198	252392	5196	261938	2686	124164	327710	97360	185922	135808	801114	162938	337606	169544	324876	213096	608874	115910	182728	158514	661124	173870	385674
294.17685 Da 859.16 s	14.32	293.17	Cinchonine	C19H22N2O	54826	55694	40212	6594	46842	0	143770	104534	0	52882	36836	59814	75056	45190	71052	47330	63278	57170	33428	157126	4204	44022	30712	86980
295.90187 Da 126.48 s	2.11	294.895			3696	4218	4670	4748	4086	3544	3110	4640	3198	3830	4534	4140	4574	3784	4324	4204	3442	3792	4254	3538	3018	4408	3650	3790
295.90203 Da 232.13 s	3.87	294.895			2492	3492	3018	146	2880	1190	1966	2754	1698	2640	2424	2998	2630	3140	2592	2790	2870	3144	2742	2742	158	2586	2100	2604
296.13568 Da 818.82 s	13.65	295.128	_2S,3S_-2-_E,3R,4S_-3,4-dihydroxypent-1-enyl_-6-oxo-2,3-dihydropyran-3-yl_ _E_-2-methylbut-2-enoate	C15H20O6	6886	3750	3330	754	3346	2312	2330	4082	3016	4202	2502	3150	3250	2992	3054	3544	4386	4372	4694	4164	2412	3888	3022	2554
296.15346 Da 774.48 s	12.91	295.146			2894	2922	3204	3196	4126	1726	2740	2682	2170	2978	2968	3270	2758	3156	3054	2262	3946	3268	2186	2540	2216	2508	1916	3274
296.18648 Da 923.23 s	15.39	295.179			0	1018	448	7692	1574	6740	3308	1136	1930	1128	398	0	386	1250	0	0	0	502	0	5224	2840	592	2188	0
296.18774 Da 902.89 s	15.05	295.18			2320	7612	1258	1764	1650	1464	1920	8682	1034	5100	980	17804	2222	9728	2004	5326	2330	5910	1162	0	0	11246	0	0
296.22607 Da 840.86 s	14.01	295.219	12,13-EODE	C18H32O3	14968	21886	11806	27406	24236	7254	14468	46336	13166	27466	10228	81580	8008	27670	12908	17462	9876	31598	5336	14304	10000	76950	10378	10602
298.11483 Da 796.38 s	13.27	297.108			6002	4492	4988	3852	4100	4268	3742	3506	3024	2896	3646	2784	3668	3390	4468	3202	4208	3448	4710	2948	3204	2406	2282	2712
298.15119 Da 834.88 s	13.91	297.144	C10-LAS _TENTATIVE_	C16H26O3S	614572	382292	303368	13084	485516	545430	622710	874466	451234	409192	359506	912598	319190	734192	468300	741860	711748	1145208	480640	782770	636924	550236	489644	576374
298.20513 Da 801.61 s	13.36	297.198			1660	3624	1488	2568	1768	2898	2450	2896	3556	4062	9962	13074	3230	4148	2568	7684	3962	9560	2056	2256	2070	14170	1876	2654
298.24174 Da 854.18 s	14.24	297.234	Lichesterylic acid	C18H34O3	23618	44754	20082	23646	22226	24170	14548	46206	16584	29506	0	152140	17158	54124	21114	29612	18730	61466	7516	48576	16758	106862	22204	33394
300.14794 Da 691.49 s	11.52	299.141			2082	1940	1710	2412	1968	2268	2658	2604	0	2416	2532	0	2050	2240	2334	0	2280	1926	2626	2242	2836	0	0	2334
300.14800 Da 675.15 s	11.25	299.141			2162	1980	1628	0	2002	2624	2552	0	2296	1886	2570	2792	1976	0	2382	1884	2242	2082	2320	2494	3362	2290	2796	0
300.18458 Da 754.50 s	12.57	299.177			4380	4556	3320	3970	4100	2956	4694	4748	4252	4730	4928	5098	4466	4722	4116	3998	4624	4746	3630	4802	2736	4224	5178	4756
300.19982 Da 924.44 s	15.41	299.193			19886	205998	9432	0	15306	0	14746	25878	7956	20492	6790	15212	8774	37184	16632	14232	14070	41574	8096	33882	16636	14822	9432	0
300.22085 Da 808.37 s	13.47	299.214			4676	4850	4048	4384	3392	5580	4200	5206	5522	5466	4882	6600	4590	5808	3208	4178	2998	7766	4838	5356	3776	5852	3860	3772
300.25719 Da 868.49 s	14.47	299.25	12-Hydroxyoctadecanoic acid	C18H36O3	12068	33924	8658	3874	13378	21382	13982	27224	10448	21292	5544	74362	11134	23552	13478	21580	13434	37004	5842	23578	11606	41348	13788	21488
302.11983 Da 781.59 s	13.03	301.113			884	6818	2968	1020	638	1038	1072	4376	728	766	2084	6510	3456	0	730	4364	1700	9998	3220	0	310	9632	462	1018
302.16310 Da 688.00 s	11.47	301.156			2438	2092	1592	2404	2204	3670	3600	2868	3352	3116	3756	3378	2492	2408	2894	3578	2588	4248	2958	2540	3460	3488	3098	2912
302.16351 Da 706.88 s	11.78	301.156			3238	2956	3246	2944	3502	3382	2956	3178	3234	3014	2564	4124	2644	2632	2656	3156	3192	3178	2386	3436	2448	3134	3052	4112
302.20021 Da 743.91 s	12.4	301.193			1832	1702	1812	1780	2340	2616	3034	3136	3174	3154	3704	3496	2126	3250	2700	3496	2704	2708	2650	0	1904	4088	2448	2640
302.21561 Da 903.10 s	15.05	301.208			2216	3484	392	0	992	0	0	26926	526	4614	516	99724	576	16150	1558	4716	1468	9136	304	1984	434	89534	0	0
302.23626 Da 817.43 s	13.62	301.229			1528	1236	988	0	1448	1724	1308	3954	2242	2462	7060	3178	1948	1848	1628	2202	1834	1820	3022	1620	1620	4106	1822	2388
304.14276 Da 751.95 s	12.53	303.135			1758	1838	1430	0	1970	2038	782	2802	1546	2300	2132	5602	1672	1860	1888	2576	1768	2598	1970	2298	736	0	2358	2150
304.14319 Da 599.98 s	10	303.136			1488	1626	1612	1276	1766	1316	1258	1898	1126	1800	1202	1738	1828	1296	1602	1420	1334	1788	1780	1440	0	1838	1910	1284
304.17905 Da 660.14 s	11	303.172			554	0	0	0	1230	2292	1850	3710	2388	1792	5854	0	2062	0	2132	0	2420	0	3744	2506	3876	0	3556	2702
304.17912 Da 651.17 s	10.85	303.172			280	0	0	0	0	0	2062	0	0	0	0	2436	0	1806	2370	2052	0	2248	3682	0	3388	2082	3108	3058
304.21618 Da 780.83 s	13.01	303.209			1466	1678	1420	1108	1040	1072	1154	1664	1320	1482	1998	2436	1492	2562	1516	1674	1200	2756	1734	0	996	1890	0	1148
304.23141 Da 925.54 s	15.43	303.224	Arachidonic acid	C20H32O2	208	28160	812	0	3564	2222	528	161138	422	16984	952	1025422	2584	0	0	14014	1518	22186	504	486	696	249050	322	448
305.85431 Da 159.24 s	2.65	304.847			2094	1958	2296	2286	2258	1880	1870	1698	1932	2304	2420	1660	2030	2098	2306	2394	1906	2112	2010	2192	1836	1906	2406	2188
305.85458 Da 228.09 s	3.8	304.847			2388	2110	1922	0	2038	2152	1878	2074	1918	2540	2152	2186	1852	3140	2120	2164	2462	2712	2364	2034	0	2332	1926	2162
306.07920 Da 786.19 s	13.1	305.072			0	0	440	3458	0	0	2854	0	3450	0	0	0	0	0	0	496	0	296	0	5250	2698	0	3588	4254
306.08020 Da 795.12 s	13.25	305.073	Epigallocatechin	C15H14O7	5116	3822	3820	0	3972	0	0	3636	0	4164	3090	2638	4114	4540	3640	4694	4264	4890	3318	0	0	2872	0	0
306.19514 Da 737.27 s	12.29	305.188			1614	1758	1678	750	2046	484	608	1886	1380	1884	1952	2000	1524	2878	1960	1552	1516	2052	1442	1732	662	2140	1528	2360
307.85192 Da 234.30 s	3.91	306.845			1492	1546	1692	142	1556	1394	1794	1620	1536	1596	1836	1828	1550	1606	1456	1790	1776	1582	1500	1548	0	1622	1600	1554
308.11672 Da 676.78 s	11.28	307.109			614	528	620	384	1102	3362	0	6754	0	2504	4676	5808	2818	3858	2830	3638	3474	2074	4106	2376	2844	3894	2774	3442
308.15352 Da 752.00 s	12.53	307.146			1866	2472	0	0	1678	1516	2468	2126	1298	1684	1912	2624	2266	1886	1988	1930	1578	3414	1832	1558	0	1770	1836	1742
308.19169 Da 877.48 s	14.62	307.184	albocycline	C18H28O4	6746	8306	7652	4658	6432	4292	5562	8286	3684	8080	8416	4746	14472	5616	7260	8924	10402	9172	7108	5692	3170	10552	2892	9038
308.21088 Da 757.37 s	12.62	307.204			2652	2942	3040	1152	2138	1582	2586	2570	940	2640	2472	2768	2590	2160	2626	3146	2512	2888	3072	2276	1652	2380	2204	2214
310.13203 Da 667.85 s	11.13	309.125			514	658	512	0	882	2226	0	4812	1962	1460	2902	4452	1682	2730	1750	2514	1940	1754	1874	1832	0	4434	1926	2232
310.15068 Da 834.22 s	13.9	309.143			9710	6406	6888	0	7454	8590	11170	13778	7538	7356	6606	13544	6538	13798	8746	10854	11098	20670	7824	11782	9378	8826	8282	10350
310.16874 Da 779.22 s	12.99	309.161			16044	37944	12332	3146	11252	0	7586	26288	7110	15934	8804	51794	9854	29026	11466	29196	14638	34130	7660	12440	2410	52366	8730	33930
310.17187 Da 844.58 s	14.08	309.165			21936	19196	10222	0	15284	26224	36702	23616	24122	14746	7912	32302	25222	19378	18788	19994	20780	22104	10304	31008	22848	8122	19828	21006
310.20256 Da 910.89 s	15.18	309.195			1926	1722	1300	1254	1216	3056	1408	2282	2052	2908	1022	2822	0	3894	1786	2526	1910	3402	982	3194	1750	5178	1856	2756
310.20465 Da 788.02 s	13.13	309.197	FA 18:3_2O	C18H30O4	1632	0	1078	8830	2058	13610	7752	9760	12054	11270	9310	105742	23050	43872	25366	36702	26076	9574	12246	23086	16164	45702	13420	24456
312.12998 Da 813.11 s	13.55	311.123			3480	3288	1562	3326	2280	3414	3534	3738	0	3554	2552	2636	2832	1910	0	4226	2710	4060	2790	2950	2274	2002	3704	2478
312.13020 Da 754.74 s	12.58	311.123			2456	2184	1386	658	2108	1672	0	2248	1332	2210	2150	1792	2010	2374	1856	2418	1766	660	1620	2492	1618	1636	2250	1470
312.14166 Da 706.82 s	11.78	311.134			0	0	1064	736	0	0	0	2024	0	0	0	33176	0	3546	0	5420	0	44132	0	0	1104	62436	0	876
312.16630 Da 848.30 s	14.14	311.159	Thymol-beta-D-glucoside	C16H24O6	1101174	1251392	1234822	98618	1338794	3021392	3878200	1745292	2845968	1226334	944258	1636068	1022712	1657478	1721880	1552552	1558790	2182984	967374	3167586	3237372	1027894	2827400	1784126
312.18361 Da 727.27 s	12.12	311.176			1290	1266	0	0	1382	8068	2950	2306	9366	5950	0	25782	1724	12148	6266	9710	6622	2210	2144	5364	2858	9784	3702	4840
312.22036 Da 813.51 s	13.56	311.213	FA 18:2_2O	C18H32O4	12642	32600	6988	36980	27240	137752	38614	62680	119218	112200	101750	633730	128222	230512	136192	204798	168728	129442	96624	104994	67652	384782	127882	73206
312.25643 Da 857.10 s	14.28	311.249			0	3380	2064	3736	2650	2822	2602	3322	3722	2810	0	4656	0	4238	2652	3656	0	3748	2060	3220	2946	3464	2592	0
314.11752 Da 784.74 s	13.08	313.11			0	3452	0	6356	0	1420	260	8298	0	1742	0	23974	698	9068	842	15020	738	2780	456	330	0	26028	356	2380
314.14520 Da 788.46 s	13.14	313.138			5308	5188	4014	3802	3518	2810	4426	3908	4482	3630	3394	4842	6676	4764	5310	3520	6076	5544	5410	6776	4038	0	3334	6004
314.16319 Da 691.96 s	11.53	313.156			2172	1776	1892	1936	1846	2422	1990	2100	0	1872	2662	1970	1890	2414	0	2156	1938	1724	2248	2188	2018	2180	2410	2092
314.18979 Da 949.17 s	15.82	313.183			570	20688	6120	750	566	1396	1552	18790	1302	14220	7848	16592	8934	0	1004	9140	2640	9854	6782	878	1454	14214	1224	982
314.19939 Da 739.22 s	12.32	313.192			1374	1332	0	1934	2232	3446	3392	6852	3436	3942	11006	4538	3786	4640	3654	4546	3752	2500	5920	4106	4372	5978	4718	5208
314.23578 Da 807.11 s	13.45	313.228			7708	7036	7678	8568	7168	13310	10760	11700	9790	10962	10890	24144	8694	15338	10272	14460	12450	13402	13812	12526	11042	21094	17048	9350
314.27220 Da 863.79 s	14.4	313.265			2734	3992	1980	2266	2596	1574	2350	2616	1794	2328	1572	2748	2462	2504	2510	2736	2458	2768	1396	2634	1572	3208	2540	3100
315.80719 Da 148.85 s	2.48	314.8			1410	2136	1646	1608	1706	1904	1696	1850	2084	2224	2334	1710	1814	1584	2290	2070	2310	1770	1860	2332	1710	1462	2156	1622
315.88339 Da 155.26 s	2.59	314.876			1360	1494	1640	678	1558	1194	1150	1894	1204	1236	1376	1418	1576	1838	1802	1762	1176	1460	1720	1202	880	1652	1698	1718
316.13442 Da 811.21 s	13.52	315.127			6344	12222	2522	3986	5092	7810	3008	8348	12142	5348	4694	9656	3476	7892	6424	9140	6326	24030	2050	4778	2076	0	4514	5522
316.14219 Da 672.03 s	11.2	315.135			1842	1406	0	2110	1882	2122	2304	0	1680	1722	0	1604	1574	1664	0	1548	0	1510	1692	1820	0	2106	1680	1910
316.14256 Da 660.07 s	11	315.135			1958	0	1708	0	0	0	2022	1850	0	0	0	0	0	2000	1836	1516	1700	1980	0	2312	0	0	0	1980
316.17921 Da 728.05 s	12.13	315.172			5966	3088	3484	0	4816	2154	2142	5198	2074	4010	3940	6250	2768	3022	5126	3422	5080	6988	4746	0	2098	3760	0	2478
316.19328 Da 844.68 s	14.08	315.186			2426	3576	1630	2406	4832	3514	1654	1732	1128	1012	520	0	1562	2298	2378	1650	2356	272	2876	3014	2070	0	3280	1740
316.19342 Da 874.59 s	14.58	315.186			2722	2582	1666	1552	5106	5196	1764	1992	1332	1332	1366	1284	1816	1736	2064	1664	2020	1024	3680	2076	1562	1630	2338	2178
316.19367 Da 825.12 s	13.75	315.186			3682	2740	1720	3154	3538	2874	1242	1786	1440	2040	2604	2370	2216	0	1728	1318	1854	1746	6460	1696	1714	1832	2920	1438
316.21540 Da 754.48 s	12.57	315.208			1108	1654	1242	0	3692	7552	0	14254	8788	9144	60152	7030	4248	7932	5486	7978	6386	5002	9058	0	6348	6654	0	8132
316.25154 Da 831.35 s	13.86	315.244			6626	5408	4706	23276	26414	86816	59788	209930	52664	50592	58044	203066	40174	91314	57764	84610	70004	63032	69722	66344	89466	143138	86736	91344
317.80415 Da 148.59 s	2.48	316.797			2222	2136	1646	1710	2058	2492	2318	2296	1958	2224	2334	2150	2180	2246	2290	2070	2310	1770	1860	2332	1974	1974	2140	2196
318.15752 Da 687.89 s	11.46	317.15			3086	2700	3070	3686	3088	4052	5066	3546	3710	0	2770	4624	3340	3706	0	3538	3358	3014	3266	4510	4560	3796	4556	3734
318.15827 Da 674.57 s	11.24	317.151			4228	3406	3196	3280	3062	3760	4228	3830	0	3776	3170	0	4142	3862	3736	3988	4012	4846	3408	2992	4222	4638	2844	4420
318.19419 Da 677.37 s	11.29	317.187			408	1034	270	0	1262	2218	2386	5848	3296	2374	6520	2982	2120	3012	2816	3106	2608	1954	5918	2180	4316	3794	4220	3500
318.20979 Da 862.71 s	14.38	317.203	_E_-5-_1,2,4a,5-tetramethyl-7-oxo-3,4,8,8a-tetrahydro-2H-naphthalen-1-yl_-3-methylpent-2-enoic acid	C20H30O3	2720	4924	1608	3788	3532	3668	1964	4268	1322	4568	1622	6742	1700	5054	2898	1678	1706	2552	1790	2154	1662	5714	3458	3430
318.23044 Da 792.22 s	13.2	317.223			244	688	0	354	1260	420	1850	5888	3114	1772	3620	2580	1784	2660	1614	2642	1700	1192	2302	2414	2558	2480	3062	2748
318.23117 Da 845.58 s	14.09	317.224			4718	8126	8214	0	6936	688	1064	6846	1854	4078	4954	5238	7868	6296	4248	8490	3318	9984	4908	2390	0	3406	2424	2806
320.13036 Da 662.73 s	11.05	355.099			10622	16830	21498	12082	13020	13660	11574	18906	12408	17318	24840	18140	18568	16342	13792	20154	14642	20262	17198	12296	13746	25956	14384	13810
322.13006 Da 756.04 s	12.6	321.123			1820	1428	1554	636	2502	348	2474	1852	2764	1652	1390	0	0	2364	2022	1668	1572	1710	998	2792	4880	0	0	2490
322.17092 Da 852.08 s	14.2	321.164			1218	1834	1734	2112	0	3334	1904	2320	3066	0	1192	1076	0	1818	1816	2230	1918	2532	1538	2448	2298	968	1930	2368
322.18858 Da 685.31 s	11.42	321.181			0	0	0	12772	0	10794	13328	0	12708	0	0	0	0	0	0	0	0	0	0	12824	13626	0	11200	0
322.18961 Da 674.93 s	11.25	321.182			12632	11864	11666	0	11848	13648	0	13306	0	14316	11940	14100	10772	13742	11888	11444	12226	13184	12798	0	506	16320	3178	12732
322.20717 Da 890.74 s	14.85	321.2			718	5344	3134	3018	3256	1172	0	5088	2672	3790	4056	3836	7864	3386	3808	3716	4768	4542	3646	0	0	3336	0	1140
324.10455 Da 831.82 s	13.86	323.097			6314	3030	3374	0	4250	4526	4636	3618	3666	3192	2264	3514	3006	3788	2728	2944	3994	4126	1208	3112	3852	1332	2560	2812
324.11046 Da 697.98 s	11.63	323.103			1210	1542	0	1544	0	2442	1748	546	1730	0	0	0	836	0	0	0	0	0	0	2372	2772	652	2026	0
324.11150 Da 687.76 s	11.46	323.104			0	0	402	0	400	1366	0	3134	0	1524	1868	2462	1396	1916	1386	2126	2230	1022	2300	0	0	2356	0	1860
324.16594 Da 848.12 s	14.14	323.159			9028	10658	9758	910	9506	18118	18892	13128	15828	8808	6664	10628	8062	13116	10414	11590	9850	14432	6566	16784	21774	7226	14784	12292
324.18358 Da 771.27 s	12.85	323.176			1154	1072	0	1774	0	1804	1484	2498	2292	1732	3038	4268	1718	2730	1786	0	2130	1744	2502	2366	1896	3320	2612	2212
324.18661 Da 862.40 s	14.37	323.179	Quinidine	C20H24N2O2	5476	4706	0	0	5276	8284	12424	8156	9242	5214	2932	4994	4708	4308	5520	4758	5468	4252	3402	10218	8516	5750	10388	7230
324.21790 Da 971.60 s	16.19	323.211			15062	3412	1656	5106	12650	1870	1624	7092	7366	18852	2158	10410	2112	44596	16334	2224	5622	2182	1804	29222	1784	3382	12558	0
324.21851 Da 949.52 s	15.83	323.211			2768	38178	12174	2936	2866	2698	2060	39826	3098	0	13956	39610	17930	2642	1738	20276	0	20498	13988	2360	3054	28778	2682	1892
324.21998 Da 770.80 s	12.85	323.213			4282	2820	3096	3996	2996	2530	4718	4214	4608	4374	4200	3132	3352	2616	3572	3788	3916	3476	4334	4386	2996	4384	3360	4462
325.75996 Da 144.11 s	2.4	324.753			4270	5192	3154	0	5378	1330	724	5330	3960	1886	5498	5560	4258	4868	4222	4622	4030	4172	5294	2534	838	5816	1766	3448
325.91171 Da 155.87 s	2.6	324.904			2158	2024	1490	368	1686	800	972	1586	1076	1712	1598	1442	1478	2072	1756	1570	1720	1594	1648	1152	594	1470	1492	1820
326.14523 Da 775.70 s	12.93	325.138	_4E_-7-acetyloxy-6-hydroxy-2-methyl-10-oxo-2,3,6,7,8,9-hexahydrooxecin-3-yl_ _E_-but-2-enoate	C16H22O7	6176	4952	6866	0	6780	5020	5830	5470	5288	5790	5250	6698	5726	4984	5582	5766	5292	5666	6792	6526	5242	3830	6352	6384
326.18114 Da 869.76 s	14.5	325.174	_5-acetyloxy-3-_hydroxymethyl_-2-oxo-6-propan-2-ylcyclohex-3-en-1-yl_ 3-methylbutanoate	C17H26O6	0	0	0	0	0	2533436	3903390	0	2983124	0	0	39990	0	0	0	0	0	0	0	3715468	1659826	0	2512612	2124386
326.18154 Da 846.93 s	14.12	325.174			169324	154506	156224	5106	202492	279374	336170	192100	260806	146270	105872	95860	133052	250488	0	219018	0	254342	101762	286706	291148	0	0	215860
326.18156 Da 859.79 s	14.33	325.174	_5-acetyloxy-3-_hydroxymethyl_-2-oxo-6-propan-2-ylcyclohex-3-en-1-yl_ 3-methylbutanoate	C17H26O6	4068318	3362548	3322208	269872	4708886	0	290366	5173542	0	3880540	2702900	3332542	2845912	4033506	4484580	4702906	4897858	3777638	3083380	0	0	3499330	1105022	4162368
326.18371 Da 628.74 s	10.48	325.176			1552	328	1590	0	1572	1212	1412	1226	1162	1930	3752	3550	1314	1434	2536	1380	1036	3034	4846	1348	1544	1410	1034	1482
326.19931 Da 748.55 s	12.48	325.192			2618	2242	1954	4666	38326	556834	136214	154640	320816	288378	294970	1052402	306536	876610	315214	637312	354142	175828	120008	211986	4114	744136	218882	325004
326.23531 Da 821.23 s	13.69	325.228			3324	6484	3218	5616	3520	3082	2378	4280	3230	4878	3032	12718	5240	3496	3176	5126	2736	0	3810	2890	2506	16242	2386	2826
326.27074 Da 860.41 s	14.34	325.263			1766	0	1526	456	1754	0	0	1954	0	1752	1354	2474	1246	0	1652	1446	1884	1748	1176	0	0	0	0	400
326.27098 Da 880.76 s	14.68	325.264			0	2110	1114	0	1682	1750	1470	1740	1530	0	0	3336	1436	2508	1462	1866	2316	2054	1010	1970	1388	3634	1478	2166
328.11153 Da 655.68 s	10.93	327.104			1468	1422	2088	1432	1894	2114	1726	1814	2508	1794	2050	1742	1576	1352	1686	1432	2030	1896	1370	2690	2366	1958	2542	1950
328.16056 Da 788.15 s	13.14	327.153			6280	5870	5654	4358	5932	6026	7496	7338	5244	5444	6498	0	7134	6652	6504	6438	7426	7778	7156	13152	5482	5340	5968	7054
328.16101 Da 805.88 s	13.43	327.154	_3E,12E_-3,12-dimethyl-8-methylidene-6,18-dioxatricyclo_14.2.1.0_,_nonadeca-3,12,16_19_-triene-7,17-dione	C20H24O4	8606	8014	6876	4454	6996	4126	3490	8440	4404	6242	6806	5928	6840	7140	5514	8522	8186	6964	7460	6074	2952	0	6504	3748
328.17899 Da 746.92 s	12.45	327.172			4382	7360	4806	2690	4230	2446	2510	4490	2254	3482	2798	5466	2466	4124	2352	4048	3270	5104	2624	2870	0	6762	3900	4754
328.21467 Da 745.12 s	12.42	327.207			0	0	0	0	9840	0	30784	77696	51954	51118	45346	163006	43792	125332	60926	105376	62802	59408	32138	45494	6990	157590	53146	94748
328.25138 Da 830.67 s	13.84	327.244			0	7800	0	1918	5820	5074	0	0	0	9058	8620	7652	11202	7554	0	6484	6516	13362	11050	0	0	6914	5880	7734
328.25168 Da 832.39 s	13.87	163.119			0	2436	2630	0	2416	1912	1242	4096	1654	2262	2236	4560	3206	2512	3788	3974	2334	0	2122	0	1730	4314	1264	3776
330.15012 Da 779.93 s	13	329.143			7442	10534	5562	24050	6594	10684	3048	5828	3772	4088	2578	16538	3420	7104	4368	5256	5730	8646	2244	4482	6354	10592	5018	8504
330.15757 Da 659.35 s	10.99	329.15			2030	1968	1728	2152	1794	2074	1948	2254	2068	1692	2298	2382	1940	2244	1870	1914	1866	1928	1778	2234	1938	2540	1828	2264
330.17320 Da 763.40 s	12.72	329.166			0	5804	5044	2746	5556	6800	3458	6374	3174	2380	8324	8316	5262	3572	3594	0	3760	2520	5660	3204	2834	0	0	2934
330.19415 Da 684.51 s	11.41	329.187			0	508	0	0	3542	8242	8876	15154	12454	8732	77170	9234	5264	6618	6970	6230	6974	4548	9356	6386	9472	9064	7848	6338
330.23039 Da 794.51 s	13.24	329.223			3236	3820	2648	9534	80462	301544	103900	521738	183162	169262	309640	388144	75674	283516	134462	295548	221038	116270	239882	132240	238436	460852	279198	347484
330.23042 Da 771.55 s	12.86	329.223	FA 18:1_3O	C18H34O5	0	4464	4186	110386	101388	432106	235718	1039880	387120	313266	689468	524466	95676	423532	157104	475056	243360	193242	309656	162410	273200	551220	248534	351210
330.26694 Da 988.37 s	16.47	329.26			1230	30438	0	9512	272	4920	0	38732	0	15722	0	4864	6532	17180	362	5798	0	4588	0	8150	0	5252	374	716
332.12785 Da 702.33 s	11.71	331.121			0	2846	0	0	0	1282	0	4226	0	0	0	43654	0	5434	0	8960	0	3402	462	654	0	44610	0	1080
[truncated: 516 more rows]
