# Supplementary material for: Segmental Bronchial Allergen Challenge Elicits Distinct Metabolic Phenotypes in Allergic Asthma
Source: Metabolites. 2022 Apr 22;12(5):381. doi: 10.3390/metabo12050381 (PMC9145767; doi:10.3390/metabo12050381)
Supplement: Supplementary file 1 [file metabolites-12-00381-s001.zip › Supplemental Table S2.xlsx]

## Sheet: Master_sig_data_annotations
Row	Bucket	RT	m/z	Name	Formula	-1	1	-2	2	-3	3	-4	4	-5	5	-6	6	-7	7	-8	8	-9	9	-10	10	-11	11	-12	12	Score(d)	Numerator(r)	Denominator(s+s0)	Fold.Change	q-value(%)
64	1010.04570 Da 572.19 s	9.54	506.03	NA	NA	0	6256	0	13416	0	0	0	7196	0	17552	0	30490	0	9264	0	22492	1614	8358	0	5246	446	35292	0	0	3.81552	12791.8	3352.58	NaN	0
61	1010.54711 Da 571.07 s	9.52	506.281	NA	NA	0	6272	0	14366	0	438	0	7888	0	16416	0	33846	0	10766	190	23402	1322	8406	0	6298	480	38650	0	2774	3.94088	13960.8	3542.56	Inf	0
630	1012.79729 Da 988.78 s	16.48	507.406	NA	NA	0	4372	0	5220	140	552	1068	16876	0	4626	0	1720	4804	10648	0	0	0	1070	0	8750	0	1598	4592	4152	2.90779	4081.67	1403.7	NaN	0.806589
509	1014.51912 Da 865.03 s	14.42	508.267	NA	NA	0	0	172	0	1476	6360	842	9048	452	3916	1788	2282	596	4114	2368	2506	0	660	1176	706	744	1850	2264	1158	2.00351	1726.83	861.903	NaN	4.40945
618	1028.77406 Da 988.24 s	16.47	515.394	NA	NA	8040	22608	188	24096	1060	3322	7056	106110	646	28372	0	7218	27060	68452	386	500	246	4630	0	47438	360	8728	29098	25354	2.68665	22724	8458.12	Inf	0.878774
620	1044.75062 Da 988.27 s	16.47	523.383	NA	NA	3390	7366	0	6558	0	864	2722	29972	262	11052	0	2324	9466	21722	0	0	0	1626	0	15422	0	3266	11894	9114	2.72157	6796	2497.09	NaN	0.878774
629	108.09285 Da 988.68 s	16.48	109.1	NA	NA	7252	14510	322	12216	1872	4140	6038	32648	1292	18478	422	7594	16872	42190	864	824	806	4632	194	21372	784	8060	18882	16710	3.67699	10647.8	2895.8	17.5322	0
701	1088.60324 Da 542.56 s	9.04	363.875	NA	NA	0	346	0	46012	0	1022	0	9908	0	5360	0	50142	0	16046	0	26342	0	90298	0	0	0	180270	0	0	2.29544	35478.8	15456.2	NaN	2.23926
702	1088.60463 Da 542.91 s	9.05	545.31	NA	NA	0	0	0	20660	0	358	0	3934	0	1856	0	31324	0	8796	0	10428	0	39150	0	0	0	107802	0	0	2.07268	18692.3	9018.43	NaN	2.89868
634	110.10850 Da 989.10 s	16.48	111.116	NA	NA	2030	3536	0	3170	548	1262	1548	8524	304	4768	0	2366	4272	8772	262	0	0	1136	0	4832	174	2654	4512	4248	3.69588	2634.83	712.911	Inf	0
670	1112.87185 Da 1071.20 s	17.85	557.443	NA	NA	3440	5022	0	5450	0	1270	2458	22252	0	6032	0	2582	6610	15902	0	0	0	1084	0	9568	0	2936	6536	4794	2.72978	4820.67	1765.95	NaN	0.878774
626	112.12421 Da 988.41 s	16.47	113.131	NA	NA	1404	2778	0	2212	0	756	1148	6488	308	3770	0	1496	2572	7522	0	0	0	844	0	3338	0	1710	2974	3552	3.81704	2171.67	568.939	NaN	0
54	113.08296 Da 565.35 s	9.42	114.09	NA	NA	5320	2264	4872	3054	4874	2814	7716	2638	6142	6220	4960	2266	5730	2202	5628	3312	3640	1450	11562	4748	7102	2238	6690	2792	-5.39911	-3186.5	590.19	0.496288	0
816	113.08309 Da 687.98 s	11.47	114.09	NA	NA	1486	3598	532	4558	832	2640	0	2426	828	1642	478	8752	1116	4260	0	4046	1696	11628	378	0	660	5970	0	4004	4.12784	3793.17	918.923	Inf	0
638	122.10840 Da 989.38 s	16.49	123.116	NA	NA	6352	11498	338	10738	1286	3624	4828	24922	1050	16148	0	6212	13352	30772	500	876	616	2824	250	15396	502	6212	13692	12290	3.83335	8228.83	2146.64	Inf	0
631	124.12405 Da 988.89 s	16.48	125.131	NA	NA	2836	4616	286	4086	596	1224	2092	12800	522	5382	0	2526	5226	12202	214	280	0	1002	0	5514	388	2792	6080	4564	3.09311	3229	1043.93	Inf	0.610392
610	126.13976 Da 987.25 s	16.45	127.147	NA	NA	1174	1884	0	2070	358	688	1196	4498	208	2564	0	1148	2774	6898	0	374	0	878	0	2694	0	1292	2898	2364	3.37819	1562	462.378	Inf	0
1482	128.11657 Da 796.49 s	13.27	127.109	NA	NA	176	0	0	364	1400	6770	2490	5176	3162	4708	5776	25034	7488	16142	7028	10444	7668	4844	5524	4756	4206	12788	4490	5564	2.1898	3931.83	1795.52	Inf	2.89868
67	129.15054 Da 572.90 s	9.55	130.158	NA	NA	3650	1130	2800	1346	2622	1218	5238	1230	4690	2270	2300	1286	1830	880	3110	1074	2536	1186	6464	2896	3166	1204	2436	1008	-5.75783	-2009.5	349.003	0.422398	0
308	1343.47263 Da 731.31 s	12.19	672.744	NA	NA	0	6162	0	20234	0	518	0	1764	172	0	302	46644	0	4938	0	7522	0	14772	472	0	528	81992	0	0	2.11466	15256	7214.4	NaN	2.89868
312	1343.72281 Da 731.59 s	12.19	672.869	NA	NA	344	6206	0	21850	0	484	602	2634	0	0	0	45908	0	5652	0	5800	0	16070	726	0	0	84294	0	0	2.10305	15602.2	7418.82	NaN	2.89868
621	1359.05218 Da 988.28 s	16.47	680.533	NA	NA	2950	7664	0	8342	194	884	1708	47886	182	10124	0	2712	10748	28930	0	0	0	1342	0	16460	0	3576	10952	8548	2.33819	9144.5	3910.94	NaN	2.23926
633	136.12404 Da 988.99 s	16.48	137.131	NA	NA	4330	8406	214	7314	974	2694	4100	21008	740	11266	0	4622	8718	21564	388	604	374	2820	0	9554	480	4870	9832	9654	3.86143	6185.5	1601.87	Inf	0
668	136.12410 Da 1070.76 s	17.85	137.131	NA	NA	1918	2246	0	2288	592	956	1642	6254	552	4132	0	2580	2738	5840	288	294	286	1024	0	3388	464	2522	2972	2508	3.46254	1881.67	543.436	Inf	0
617	1375.02816 Da 988.20 s	16.47	688.521	NA	NA	1516	2940	0	2606	258	376	1094	15286	0	4492	0	1168	3474	9752	0	0	0	612	0	6080	0	1408	4682	3782	2.43753	3123.17	1281.28	NaN	2.23926
632	138.13969 Da 988.96 s	16.48	139.147	NA	NA	2016	3020	0	2928	432	1184	1834	6516	260	4068	0	2274	3734	7780	0	0	0	800	0	4002	0	1412	3952	3628	3.71527	2115.33	569.362	NaN	0
779	139.06249 Da 662.08 s	11.03	140.07	NA	NA	3140	978	3014	2076	2522	2144	3014	1478	2560	2814	2186	608	2952	1856	3376	1926	3142	1430	3320	2894	2366	1594	3002	1836	-4.11537	-1080	262.431	0.627453	0
52	142.09822 Da 564.89 s	9.41	143.105	NA	NA	9052	3988	8880	5360	7404	4186	12910	4282	12258	9270	7730	3474	8466	4634	9060	5214	6654	2606	17508	6968	12072	4402	10622	5174	-6.87557	-5254.83	764.276	0.492594	0
1501	145.04877 Da 706.11 s	11.77	144.041	Indole-3-carboxaldehyde	C9H7NO	2418	3038	2656	25048	2646	3668	2806	3540	2022	3586	1618	15386	1676	4442	1538	5080	2086	8076	1430	1940	2398	11492	2216	1858	2.50731	5137	2048.81	3.4525	1.46653
712	145.05389 Da 568.83 s	9.48	146.061	NA	NA	5942	4626	3606	5624	3496	4096	2602	2156	3438	3290	3768	11074	2436	3322	2316	2448	3246	4150	3708	5018	3510	8582	3164	5266	1.99445	1535	769.636	1.44968	4.40945
1503	146.05403 Da 803.97 s	13.4	145.047	NA	NA	8974	10564	7730	3308	5116	6956	10402	11366	6922	7942	0	14368	4548	10456	10280	11842	14320	16348	5808	6676	1542	16728	3222	11164	2.33397	4071.17	1744.31	Inf	2.23926
279	1468.53985 Da 722.65 s	12.04	735.277	NA	NA	556	2084	0	59112	0	1672	444	1768	0	0	1722	0	0	18330	0	16888	0	22264	0	156	0	25982	0	0	2.31441	12127.8	5240.15	NaN	2.23926
672	1471.17756 Da 1071.24 s	17.85	736.596	NA	NA	2432	3212	0	2640	446	854	0	20160	332	4026	0	1112	5336	14558	0	0	0	520	0	6608	0	1384	4786	3546	2.11048	3774	1788.22	NaN	2.89868
1508	148.01201 Da 797.12 s	13.29	147.005	NA	NA	0	0	254	0	1346	3642	1594	3220	2184	2724	2266	10610	2582	6946	3180	5650	3104	2016	2446	2484	2128	5286	2750	2594	2.14686	1778.17	828.264	NaN	2.89868
175	148.08754 Da 663.00 s	11.05	149.095	NA	NA	1208	0	1464	0	1194	1206	0	1344	1836	0	1528	1312	2442	0	2966	1298	2580	0	3790	2524	2908	1434	4006	3432	-2.87878	-1114.33	387.086	Inf	2.89868
615	150.13976 Da 988.04 s	16.47	151.147	NA	NA	2200	3900	0	4838	690	1046	2326	9208	402	6586	0	2462	5300	11328	376	682	0	1094	0	5312	372	2696	6042	5062	3.60934	3042.17	842.861	Inf	0
1523	152.04303 Da 1193.63 s	19.89	151.036	Methylparaben	C8H8O3	13812	27250	1740	31580	16232	37644	7176	7418	10316	20476	0	9028	14994	16682	10670	4318	10112	6242	15718	15794	12646	15602	17134	15386	2.00406	6405.83	3196.43	Inf	4.40945
1532	152.04313 Da 1060.30 s	17.67	151.036	Methylparaben	C8H8O3	20362	54582	1242	77488	21266	70784	8446	13786	13122	44998	16228	18026	30158	28670	14314	9346	11772	11476	20576	27196	16970	26992	28912	20882	2.22163	16738.2	7534.2	6.732	2.89868
1540	155.06644 Da 818.21 s	13.64	154.059	NA	NA	4836	4812	3910	6536	3230	4090	4244	4880	4546	4738	2724	6216	4954	5662	5446	8106	4828	9316	3278	3076	2114	8284	4000	4760	2.85907	1863.83	651.901	1.58457	0.806589
1543	157.07084 Da 634.56 s	10.58	156.064	NA	NA	2338	0	938	126	1864	0	776	6454	1150	3702	1370	22296	1336	6818	1724	7428	3372	17376	174	2488	334	20864	1714	6838	2.71677	6441.67	2371.08	10.2721	0.878774
842	157.07278 Da 702.97 s	11.72	140.069	NA	NA	47970	16140	46822	23406	42746	26434	47596	21912	45232	43622	28956	10412	37788	18048	52630	37066	49140	19782	39886	46020	37712	18968	43632	34132	-5.24174	-17014	3245.87	0.605216	0
462	157.95570 Da 832.12 s	13.87	158.963	NA	NA	15508	7844	20860	7836	17082	7834	6266	8300	13548	9458	17482	6422	11086	10958	13638	10046	13994	6006	9360	9742	12050	4172	11504	11086	-3.493	-5222.83	1495.23	0.686257	0.878774
553	157.95570 Da 901.09 s	15.02	158.963	NA	NA	26830	13490	27714	13058	25654	12630	13738	14684	23928	18324	28424	10316	21428	22742	25864	18790	29292	11756	20304	17466	20770	0	18894	21650	-3.64954	-8994.5	2464.56	0.654927	0.806589
1369	157.95575 Da 940.29 s	15.67	158.963	NA	NA	27266	13122	28418	12296	24880	13564	13332	0	22838	0	25844	10018	19972	19584	26202	20254	28078	14554	21138	19150	20052	7148	19058	22048	-4.64926	-10445	2246.59	0.544831	0
53	159.12485 Da 565.09 s	9.42	160.132	NA	NA	62084	23460	59798	40438	52060	30648	101130	30134	83398	67772	57538	24826	66790	26276	67888	35284	45852	18908	129978	51340	90600	26194	73428	37184	-6.59497	-39840	6040.97	0.475078	0
1260	160.08769 Da 844.20 s	14.07	161.095	NA	NA	33496	26874	22764	49228	28010	47428	33020	50710	22380	72684	14378	24182	35628	58452	30576	25058	36594	28118	16394	33144	24106	42304	33104	34154	2.73958	13490.5	4924.3	1.59669	0.878774
187	1602.93017 Da 675.99 s	11.27	535.317	NA	NA	2102	0	0	22700	1738	2070	1014	13790	910	8444	2596	85674	0	66686	270	8634	0	23860	0	0	0	18632	0	0	2.53521	20155	7950.03	NaN	1.46653
122	1636.86359 Da 615.54 s	10.26	546.628	NA	NA	526	2034	1374	4630	0	718	0	2072	0	12426	0	14092	166	11190	550	5704	512	1916	176	2324	1166	10238	0	1670	3.63332	5378.67	1480.37	Inf	0
424	164.04608 Da 809.00 s	13.48	165.053	NA	NA	2442	4460	2786	4654	1988	1700	1522	2260	788	1610	776	4536	1652	2430	1326	2968	1790	8584	1106	1332	1102	3504	1994	3730	3.06064	1874.67	612.507	2.37373	0.610392
611	164.15532 Da 987.38 s	16.46	165.163	NA	NA	2242	3076	0	2912	454	990	1480	6530	358	3928	0	1600	3688	9774	210	304	274	1144	0	4666	368	1874	4144	3804	3.34634	2282	681.939	Inf	0
1276	166.02528 Da 851.43 s	14.19	149.022	Phthalic acid	C8H6O4	0	9922	0	6914	12898	76028	36882	48486	46930	70782	36090	175742	56676	132808	68336	109138	81332	51420	56124	75056	48892	92980	70932	68272	2.61362	33538	12832	Inf	0.878774
65	166.05997 Da 572.30 s	9.54	167.067	NA	NA	1202	0	0	842	1882	3084	3226	1214	5312	3648	8902	1522	3452	1186	4466	888	4510	0	3742	3558	4604	0	5270	2844	-2.98755	-2315.17	774.939	Inf	2.89868
1558	166.09434 Da 679.13 s	11.32	165.087	NA	NA	0	972	712	0	1354	948	1526	0	1894	0	3418	0	3974	0	5182	0	4012	676	9566	4856	10064	0	9952	7744	-3.38927	-3038.17	896.408	Inf	0.878774
1559	166.09489 Da 744.20 s	12.4	165.088	raspberry ketone	C10H14O2	908	7414	708	1388	966	0	0	2268	0	2360	1246	46054	818	5338	988	15458	1072	42736	1428	0	1032	106948	1700	1818	1.98559	18409.7	9271.66	Inf	4.40945
203	167.03920 Da 691.15 s	11.52	168.046	NA	NA	0	0	0	0	0	3310	0	772	0	584	0	38256	0	3572	0	2698	0	16270	0	0	0	19900	0	0	2.03612	7113.5	3493.65	NaN	4.40945
1561	168.11010 Da 789.15 s	13.15	167.103	NA	NA	2230	2196	2058	9758	1932	1396	1672	1840	1288	1280	1266	13800	1702	2804	1700	4002	1848	10202	1802	1624	1968	10762	1698	2596	2.46492	3424.67	1389.36	3.07202	1.46653
802	168.11166 Da 681.18 s	11.35	169.119	Geranic acid	C10H16O2	74658	37654	85670	53008	75336	49736	62780	33608	74980	67222	59146	54472	67842	37992	71320	71896	77882	98852	64314	58840	61940	45950	73854	69140	-2.85327	-14279.3	5004.55	0.797197	2.89868
758	170.09099 Da 642.33 s	10.71	171.098	NA	NA	22618	11174	23376	8652	25900	21148	22942	11110	29030	31536	22316	11756	19078	12122	25456	23588	30154	21398	31374	41374	13514	8926	37894	24704	-2.96176	-6347	2142.99	0.723405	2.89868
307	171.08819 Da 731.29 s	12.19	172.095	NA	NA	1606	4206	1372	4446	1268	4354	866	2094	1106	1894	644	8074	1178	2546	1598	3814	3258	12972	640	1310	620	5800	1580	8744	3.99667	3709.83	928.23	4.28554	0
77	1713.84947 Da 588.10 s	9.8	572.29	NA	NA	236	194	134	3380	0	0	142	3048	0	866	382	73566	0	6550	0	3350	0	75242	0	0	208	67230	0	0	2.09707	19360.3	9232.07	NaN	2.89868
1571	172.10493 Da 663.00 s	11.05	171.098	NA	NA	41972	39660	31596	51932	39312	14302	11184	63010	11502	40098	46200	123486	31606	49442	35520	44518	38626	49234	42538	12202	52638	82594	0	47860	2.18366	19637	8992.72	Inf	2.89868
1575	172.14139 Da 837.39 s	13.96	171.134	NA	NA	102700	121292	100978	122562	89320	85654	92852	126896	83292	75606	106290	138468	68442	119730	91280	157394	125648	136516	124826	120590	47672	126014	93352	125748	3.42882	27484.8	8015.84	1.37062	0
113	173.14026 Da 609.58 s	10.16	174.148	NA	NA	3700	1720	4132	2372	2674	1896	3844	2922	3348	3132	2522	2788	3370	2560	4426	3758	3362	3128	3132	3200	4196	3672	3308	2500	-2.68434	-697.167	259.716	0.81173	4.40945
1576	173.99384 Da 568.35 s	9.47	172.987	Phenol sulfate	C6H6O4S	4152	3486	1666	0	2590	0	1682	18836	1456	7698	4912	116818	6328	25922	1150	27942	3282	41458	5042	19172	0	14180	1720	15104	2.37786	21386.3	8993.96	Inf	2.23926
1578	174.12021 Da 727.77 s	12.13	173.113	Gramine	C11H14N2	5400	5710	3764	15408	5470	20246	0	8890	6782	7382	9590	20386	5244	6564	7230	8948	6416	9930	6218	0	16224	15030	6844	7870	2.11683	3931.83	1857.42	Inf	2.89868
1579	174.12050 Da 685.51 s	11.43	173.113	Gramine	C11H14N2	6554	4294	5064	13014	6200	10962	7480	13622	6524	9118	9586	14196	6230	10918	6836	8170	6874	10204	11414	11370	12870	13188	7922	11420	3.43756	3076.83	895.062	1.4656	0
718	178.05951 Da 575.96 s	9.6	179.067	NA	NA	1620	1408	1620	954	1764	2150	2702	1558	2294	1800	2596	0	2488	1558	3012	1626	2436	0	2796	2448	2850	1388	3570	2386	-3.25245	-1039.33	319.554	0.602922	1.46653
1584	179.05306 Da 570.15 s	9.5	178.046	Hippurate	C9H9NO3	564	2476	632	716	598	1246	3796	27834	918	2100	1734	14554	978	2762	654	2338	1916	11662	296	398	780	37960	484	544	2.1844	7603.33	3480.74	7.43674	2.89868
332	180.01493 Da 748.29 s	12.47	181.022	NA	NA	22594	9866	29886	14098	23448	9146	9784	8982	15754	14124	11612	6648	15878	15884	20154	12414	18650	12968	11422	14892	13932	2970	16556	13582	-3.33633	-6174.67	1850.74	0.694545	0.878774
179	180.03885 Da 669.34 s	11.16	181.046	NA	NA	2372	918	2904	962	2390	1704	2474	1066	2134	2540	1830	0	1934	968	3838	3126	2464	992	2202	1958	2334	794	3088	1304	-4.14877	-1136	273.816	0.535137	0
145	180.09235 Da 632.04 s	10.53	181.1	NA	NA	2464	0	7894	0	3286	3490	47522	4182	18656	4172	11932	1194	3640	1996	23664	1448	14178	756	63710	8920	28636	1270	25274	3170	-3.70866	-18354.8	4949.18	0.203869	0.610392
155	181.18171 Da 639.88 s	10.66	182.189	Dicyclohexylamine	C12H23N	100220	11274	99938	12514	87980	41432	102750	17240	85092	85986	67050	9942	108076	17054	114672	33326	84038	18696	105696	97480	134656	9620	116870	38106	-6.52191	-67864	10405.5	0.335488	0
521	182.16569 Da 876.63 s	14.61	183.173	NA	NA	7268	9284	5790	13512	7344	7636	7310	24462	5332	14680	2986	4666	7126	18760	7456	7948	4142	10904	2926	9414	5862	6412	9600	7114	2.98239	5137.5	1722.61	1.9747	0.610392
884	184.10634 Da 717.54 s	11.96	185.114	NA	NA	213316	61664	182456	55782	190478	120100	155726	96892	176234	205454	107906	29800	153564	60514	243894	177880	209928	236844	192820	161972	127304	19066	237310	218008	-3.82324	-62246.7	16281.1	0.620795	0.610392
841	185.10380 Da 702.96 s	11.72	208.093	NA	NA	866568	341800	944710	513248	805130	608594	720688	440736	904724	805476	661700	253030	761016	462796	1059638	706482	1062162	363248	715806	877572	664274	229900	943138	694154	-5.04143	-317710	63019.8	0.625232	0
1598	186.15647 Da 855.83 s	14.26	185.149	NA	NA	23572	31216	27320	72912	22168	18098	13012	29678	14710	19062	17822	18860	20858	23270	18002	30244	17652	30114	15890	17010	0	21324	18182	22084	2.6643	10390.3	3899.84	Inf	0.878774
74	187.06196 Da 580.19 s	9.67	188.069	NA	NA	13004	27866	7802	38534	13476	35080	5728	16246	6628	7618	7172	132964	8210	24334	10116	19036	7800	43672	2906	5272	8830	88342	8106	36944	2.96486	31344.2	10571.9	4.91927	0.610392
439	188.07911 Da 816.70 s	13.61	189.086	NA	NA	21228	10102	22462	13084	19374	7734	12026	10458	14442	14408	12384	11418	16582	14234	16138	9870	15348	13962	10422	11856	12056	5950	12990	12438	-3.00318	-4161.5	1385.7	0.767929	2.23926
1604	188.13576 Da 771.82 s	12.86	187.128	10-Hydroxydecanoate	C10H20O3	12248	14476	12306	14660	10746	8974	6966	17086	12348	14434	15974	45000	12690	19076	14934	18174	11936	35568	13636	17536	8314	53834	17520	16522	2.4468	10476.8	4281.86	2.00428	1.46653
516	190.07690 Da 873.75 s	14.56	191.084	NA	NA	9218	9204	3604	10516	6176	10132	6034	9098	5416	11306	4472	11012	7754	11128	5624	6464	7904	7828	2606	7062	4926	12696	6378	7766	4.28089	3675	858.465	1.80786	0
1610	190.11510 Da 666.34 s	11.11	189.108	NA	NA	2060	1544	1058	3422	3790	0	0	11968	5858	6006	9480	16916	3936	9592	2424	9436	4186	8158	4034	0	2318	19466	5104	8930	2.2975	4265.83	1856.73	Inf	2.23926
1611	190.13355 Da 850.44 s	14.17	189.126	NA	NA	5032	18544	5344	6642	2772	262	1284	10078	1484	7684	1274	31380	2436	12504	3242	17744	6786	24720	1062	3634	398	21044	2050	7612	3.93934	10723.7	2722.2	9.74491	0
752	192.07503 Da 635.71 s	10.6	193.082	NA	NA	14508	9172	17772	11678	16258	9242	13840	14324	15262	10912	14576	14632	16326	13752	17832	16616	17586	11488	12706	15776	13870	7916	19086	14622	-3.29798	-3291	997.884	0.80145	1.46653
1614	192.10947 Da 809.38 s	13.49	191.102	NA	NA	2522	4392	2270	0	2758	3976	3040	5308	2292	3998	1462	10664	2208	3562	2404	4290	2610	8708	1914	2486	2812	6168	3144	4352	2.64129	2372.33	898.171	2.13152	0.878774
172	193.07081 Da 661.70 s	11.03	194.078	3-Methylhippuric acid	C10H11NO3	66548	24760	61726	42516	62656	37728	67118	38126	61798	61174	51502	12724	68784	34350	67412	45294	74766	20786	57650	60872	62880	17808	74324	39588	-5.69694	-28453.2	4994.46	0.565753	0
1615	194.08853 Da 745.93 s	12.43	193.081	NA	NA	2310	3244	1832	1844	2882	2164	1470	3834	2174	1880	2232	7016	3164	3186	2702	3662	2598	5584	2660	2846	1806	6246	2136	2162	2.13955	1308.5	611.576	1.65252	2.89868
1616	194.12492 Da 794.72 s	13.25	193.118	NA	NA	1040	2856	972	6160	900	2202	752	1900	694	1032	400	43322	0	0	378	5662	614	18418	706	846	0	50322	548	776	2.04368	10541	5157.86	NaN	4.40945
1617	194.16146 Da 778.77 s	12.98	193.154	NA	NA	1582	1858	1078	0	810	874	832	1966	950	1604	1218	2650	1690	2612	1458	2490	1602	2706	708	1498	838	2388	1434	2162	2.63123	717.333	272.622	1.65802	0.878774
131	195.04942 Da 624.59 s	10.41	196.057	NA	NA	588	4686	282	5272	0	3602	0	1562	0	318	578	32348	0	2036	0	1578	910	16492	0	0	0	12922	0	5588	2.5787	7003.83	2716.03	NaN	1.46653
739	196.11956 Da 616.00 s	10.27	197.127	NCGC00381364-01_3-propan-2-yl-2,3,6,7,8,8a-hexahydropyrrolo_1,2-a_pyrazine-1,4-dione	C10H16N2O2	28210	11974	27944	30836	26268	8172	26318	18390	30116	15250	59228	38034	31846	17492	18456	10936	24472	10920	7840	7814	32406	19468	10528	5700	-4.9115	-10720.5	2182.73	0.61777	0
141	197.11893 Da 631.60 s	10.53	198.126	Dibenzylamine	C14H15N	38922	6894	104532	3200	44356	56982	690560	56904	268130	56746	172132	0	47054	22650	314036	12020	189590	2394	1045540	118358	392206	13524	218896	47648	-3.28345	-260720	79404.1	0.223671	1.46653
1624	198.11978 Da 794.77 s	13.25	197.113	NA	NA	2678	1942	2458	3366	2128	1926	1096	3100	2176	2294	2988	3950	2490	2942	2264	3990	2154	2712	2606	2818	1534	2816	2102	2380	2.12886	630.167	296.011	1.37138	2.89868
976	198.12203 Da 747.38 s	12.46	199.129	NA	NA	45524	32564	36726	33232	43564	30010	41566	34902	42166	36196	28508	18676	47426	35852	40154	29958	44010	34028	28102	42402	33596	16374	45858	41958	-3.19212	-7587.33	2376.9	0.820723	1.46653
1625	198.15613 Da 835.14 s	13.92	197.149	NA	NA	16618	22810	13546	9742	16662	14424	14388	33450	14034	17288	25382	204652	20630	33744	15670	30272	18576	97962	22736	21626	11250	212792	14104	20422	2.04723	42965.7	20987.2	3.72768	4.40945
1295	199.19213 Da 863.30 s	14.39	200.199	NA	NA	4240	6142	3742	2852	3070	3252	6290	11100	2328	10154	2384	3712	3914	8722	2342	3364	5534	4594	0	9090	3412	3570	4196	6298	2.55583	2616.5	1023.74	Inf	1.46653
1633	200.17161 Da 858.10 s	14.3	199.164	NA	NA	340484	545048	245916	115590	341244	354782	220998	594002	100558	405008	240980	1273202	275006	395158	350794	547920	310536	1340574	109314	340750	221194	1356206	214454	476110	3.24367	397739	122620	2.82448	0.369028
560	200.17621 Da 910.10 s	15.17	201.183	NA	NA	6420	5542	3872	3214	4280	5634	4668	5408	3668	7800	2208	7894	4278	5118	5652	5856	7504	16136	2056	7228	3292	4428	5252	7878	2.65962	2415.5	908.212	1.71777	0.878774
7	202.04399 Da 128.23 s	2.14	203.051	NA	NA	1390	2870	1740	2332	838	2198	900	1576	926	1320	1528	9590	1502	1476	806	1372	1476	5578	1020	800	1268	3594	1140	2584	2.35187	1729.67	735.444	2.31917	2.23926
73	204.08831 Da 580.18 s	9.67	205.096	L-Tryptophan	C11H12N2O2	1568	2780	1432	4238	982	3274	556	1358	742	960	844	14342	776	1852	828	1460	734	4328	0	484	1250	11316	988	3150	2.53752	3236.83	1275.59	Inf	1.46653
1637	204.09122 Da 580.59 s	9.68	203.084	NA	NA	3706	9182	1754	8452	1764	9984	1896	2904	1666	2038	2824	31834	1908	4408	1454	3262	1866	8296	1878	1522	1216	20672	1880	7934	2.81216	7223	2568.49	4.8345	0.806589
1638	204.12996 Da 681.33 s	11.36	203.123	NA	NA	2046	2506	2476	2426	2366	1654	3244	6170	3692	5226	6916	10638	3882	7904	3760	5294	3272	5428	3600	2750	1736	9686	3906	4318	2.44551	1925.33	787.294	1.6926	1.46653
1639	205.06807 Da 601.52 s	10.03	204.061	Indolelactic acid	C11H11NO3	514	1934	672	210	908	1340	792	2646	784	1580	702	19052	1598	3314	544	3298	2074	10816	632	0	1348	15012	584	786	2.20126	4069.67	1848.79	5.32338	2.89868
722	206.14036 Da 582.02 s	9.7	207.148	Norlidocaine	C12H18N2O	337630	13466	128094	37618	99236	19370	147840	18064	921672	71046	293018	42464	96502	22118	142334	9314	246354	11254	55940	28508	106660	19506	56564	9240	-2.97894	-194156	65176.2	0.172426	2.89868
1650	208.14001 Da 809.66 s	13.49	207.133	NA	NA	20772	24536	14856	14610	22460	20836	16170	20606	16704	24738	19876	21058	18646	16032	18738	20052	16902	23016	18842	19614	11674	13804	17622	20800	2.29114	2203.33	961.676	1.13355	2.23926
782	210.13516 Da 662.52 s	11.04	211.142	Cyclo_proline-leucine_	C11H18N2O2	38462	12972	22388	24920	13394	5692	15292	16656	30268	9932	33438	21352	35164	18068	12120	8054	7352	2944	4612	4018	15318	4632	6368	3140	-3.22502	-8483	2630.37	0.598057	1.46653
581	210.19692 Da 925.76 s	15.43	211.204	NA	NA	4332	14908	662	18502	3474	4014	3084	76718	960	14074	464	6982	6598	92628	970	3710	1074	9538	398	34854	1110	8998	14848	9616	2.52157	21380.7	8479.1	17.5167	1.46653
1660	212.17136 Da 855.72 s	14.26	211.164	NA	NA	8500	13668	7262	3198	8316	0	7990	14278	6578	9770	5142	72132	8114	18760	8502	13948	8104	37276	5550	8662	4418	58652	8254	13332	2.16321	14745.5	6816.49	3.69605	2.89868
1661	213.00329 Da 593.53 s	9.89	211.996	Indoxyl sulfate	C8H7NO4S	1860	8104	2322	47672	938	3176	748	8186	2386	8040	2428	133922	2550	17218	876	8096	3112	42134	1022	2754	2196	46676	1000	4234	2.37381	25731.2	10839.6	12.9551	2.23926
1666	214.18690 Da 861.67 s	14.36	213.18	NA	NA	58922	118162	51762	2472	62804	67574	51478	136636	41686	95084	44280	74106	63062	88198	63734	106600	90654	89334	38244	79528	37480	72250	60872	83338	2.93483	29025.3	9889.95	1.59756	0.806589
607	215.91392 Da 962.65 s	16.04	216.921	NA	NA	13142	6044	14360	8084	13168	7636	6218	6004	12196	10192	14148	6412	10882	11122	14502	8794	14084	7262	10352	9344	9464	4748	11724	9034	-4.63929	-4130.33	890.294	0.681347	0
785	216.09744 Da 667.07 s	11.12	239.088	4-Formyl-antipyrine	C12H12N2O2	14426	9888	12412	9092	12852	8094	11632	12526	12422	8750	11954	11528	12030	11428	11128	11884	13942	10892	11932	11284	10382	6848	14514	10270	-3.35511	-2261.83	674.146	0.825447	0.878774
1239	220.10739 Da 836.24 s	13.94	221.115	NA	NA	13588	10370	5360	9148	7588	9784	5860	13486	5328	22058	3510	10174	8790	17890	6546	6144	20758	11572	4054	12792	7168	12984	9372	18228	2.34611	4725.67	2014.26	1.96186	2.23926
944	221.10176 Da 736.31 s	12.27	222.109	Metaxalone	C12H15NO3	95482	15384	67258	21682	57952	46600	74624	16468	75170	81486	34540	6278	52824	19492	100664	68416	95958	36956	31590	81762	43062	6428	70930	64506	-2.78567	-27883	10009.5	0.654564	2.89868
1677	221.14725 Da 776.54 s	12.94	220.14	NA	NA	2452	6100	3016	6598	2786	1964	1436	3694	1132	1684	1192	8544	1610	3544	1226	2462	1644	5624	1316	1452	1498	6420	2060	4062	3.54593	2565	723.364	2.63329	0
1680	222.15523 Da 777.59 s	12.96	221.148	NA	NA	20168	43634	19112	0	19102	0	8538	20312	6814	9838	7184	57094	8942	23168	8560	18354	12646	42494	7858	11380	10640	47166	10508	25334	2.22044	13225.2	5956.11	2.52676	2.89868
1220	224.13802 Da 828.15 s	13.8	225.145	NA	NA	6742	4038	5276	3126	6416	2826	4344	3516	5996	5676	5256	3590	5002	5540	7052	4642	6368	5196	3916	4704	5326	2408	4804	4228	-3.02194	-1417.33	469.014	0.765513	2.23926
813	225.09699 Da 688.32 s	11.47	226.105	NA	NA	13720	48538	7682	71670	12174	33926	4232	36084	7856	22686	7614	166592	11080	60672	11806	54442	27548	136312	3936	13468	5136	104432	9604	78264	4.55839	58724.8	12882.8	7.99063	0
463	225.94276 Da 833.38 s	13.89	226.95	NA	NA	15664	6228	19616	6968	14844	7438	7018	8098	12810	9912	13530	5734	12472	11148	15754	11238	14444	5754	10376	10660	12846	3368	11906	11440	-3.81443	-5274.5	1382.78	0.65511	0.610392
1388	225.94276 Da 980.04 s	16.33	226.95	NA	NA	18090	7428	22802	8784	18302	0	0	10834	0	0	19790	6322	12472	7672	23922	16418	23098	11776	18958	19656	15124	4024	13886	14322	-2.68787	-6600.67	2455.72	NaN	4.40945
1370	225.94277 Da 940.44 s	15.67	226.95	NA	NA	25534	12030	26702	12632	25422	12276	11400	11078	21854	0	23206	8324	19582	17160	27966	17658	26782	14750	19764	17476	17170	0	19714	19610	-4.75395	-10175.2	2140.36	0.557915	0
1691	228.12934 Da 688.61 s	11.48	227.122	NA	NA	4634	3722	3586	3640	4002	3486	3764	6716	0	0	7234	9990	4182	6302	0	5714	5638	5774	0	3476	3776	10866	0	6962	2.76396	2486	899.435	NaN	0.878774
853	228.13250 Da 705.22 s	11.75	229.14	NA	NA	25912	12132	25254	13394	27828	14140	20750	13180	22616	28678	19212	10792	27862	14992	24938	21100	24654	19496	22920	24770	23400	7944	25584	23988	-3.52489	-7193.67	2040.82	0.708702	0.806589
1693	228.20184 Da 929.23 s	15.49	227.195	NA	NA	11376	157462	0	256718	10800	211704	10998	206530	6996	93390	2632	54358	41200	128170	9634	43606	3866	0	3404	102808	86990	55660	20138	29394	3.62431	94313.8	26022.6	Inf	0
1695	228.20246 Da 900.43 s	15.01	227.195	NA	NA	0	449162	43652	36192	49244	26990	49748	368078	21994	196834	46320	1505138	96922	0	62078	224980	73746	307906	45034	22182	18512	969354	13812	36082	2.25367	301820	133924	Inf	2.89868
1385	228.20738 Da 971.73 s	16.2	229.215	NA	NA	2534	2980	1320	2632	1590	2118	1462	8572	1420	3304	858	6784	0	11338	1832	2998	1532	5546	730	6766	994	4712	4622	4100	3.32563	3579.67	1076.39	Inf	0
1006	230.08912 Da 752.38 s	12.54	231.096	NA	NA	4404	3024	4278	2326	4112	2474	2706	2050	4124	3414	1970	0	3944	3366	3868	3298	4626	2910	2150	2534	3004	0	5508	3312	-3.95817	-1332.17	336.561	0.627706	0.369028
180	231.04713 Da 670.46 s	11.17	232.054	NA	NA	428	2692	0	5866	352	2306	0	608	0	0	276	27996	326	1876	172	1704	736	12892	0	0	0	5430	398	3904	2.23096	5215.5	2337.78	NaN	2.89868
28	231.14554 Da 520.85 s	8.68	232.153	Butyryl carnitine _isomer of 920_	C11H21NO4	3410	10584	1968	9802	3362	7768	1034	3920	1608	2984	2324	25188	2940	9662	3566	4648	2554	12016	2518	3496	2766	16394	1762	6386	3.67562	6919.67	1882.59	3.92619	0
190	231.97584 Da 679.23 s	11.32	232.983	NA	NA	928	4936	1836	24694	1268	3086	920	10218	1630	6562	1242	46476	1336	8204	0	3660	2368	8874	0	0	2824	28016	1088	2024	2.76265	10942.5	3960.87	NaN	0.878774
775	232.11531 Da 662.18 s	11.04	233.123	NA	NA	20412	6908	19008	18094	9236	3796	6218	9214	19042	5328	27492	17072	19148	11492	6078	4922	4202	1312	3334	0	9236	2122	3012	1756	-3.38257	-5366.83	1586.61	0.551576	0.878774
98	233.90725 Da 595.52 s	9.93	234.915	NA	NA	5656	2200	3960	3634	4518	4444	4310	3226	3346	2852	5118	2832	5368	4452	4686	3408	3718	0	4404	3216	5730	3820	5860	4728	-3.69943	-1488.5	402.36	0.683736	0.610392
96	234.05579 Da 594.25 s	9.9	235.063	NA	NA	18286	12536	12846	13610	16234	15416	15220	9062	15560	16712	17562	8512	14682	13406	16782	10342	15540	3866	14530	13528	17456	11760	12494	13562	-2.86837	-3740	1303.88	0.776425	2.89868
1231	234.17160 Da 832.02 s	13.87	235.179	LID_235.1805_10.1	C14H22N2O	466292	206668	265602	284754	287044	0	249070	120636	0	0	525920	0	438896	0	380078	111892	317550	42586	0	0	488644	95008	376166	318718	-4.10073	-217917	53141	NaN	0
1441	234.17165 Da 1219.66 s	20.33	235.179	LID_235.1805_10.1	C14H22N2O	132716	68918	89346	112366	90446	125008	82418	37818	125362	171710	164760	28502	130664	78404	107892	40274	93438	22326	162734	0	144170	46246	176870	77200	-3.04677	-57670.3	18928.3	0.594179	2.23926
1019	236.10035 Da 759.17 s	12.65	237.108	NA	NA	15714	8192	14902	7150	13606	9246	10448	8774	14052	13548	8528	3290	11568	11376	16830	12602	17212	11348	10528	12350	10096	2264	16340	15800	-3.53959	-3657	1033.17	0.718844	0.806589
1709	237.10566 Da 777.11 s	12.95	236.098	NA	NA	33448	78226	31602	0	34318	0	13892	34764	10414	18668	12352	97518	14814	38274	14684	32882	25060	68884	15598	20726	18632	75574	19042	47694	2.26515	22446.2	9909.34	2.49916	2.23926
1711	238.11299 Da 726.52 s	12.11	237.106	4-O-methylolivetolcarboxylic acid	C13H18O4	15994	4722	11804	0	8160	7396	11656	6026	12634	15454	12500	6266	8720	6938	10264	5468	17982	7510	7938	15022	14762	6616	14156	9242	-2.70408	-4659.17	1723.02	0.68188	4.40945
1216	238.15305 Da 827.68 s	13.79	239.16	NA	NA	148800	88234	127458	95464	153244	82536	110078	88386	134080	136520	106232	90214	120410	128110	163536	108988	144826	130232	101040	120992	138918	53312	137650	119374	-2.99984	-28659.2	9553.57	0.802416	2.23926
563	238.18936 Da 913.80 s	15.23	239.197	NA	NA	129366	85688	129780	66452	110098	74892	96854	94270	131506	127774	96522	28822	116438	102912	132924	110990	125360	93698	99914	101884	96428	24184	119824	91436	-4.24309	-31834.3	7502.62	0.716503	0
1390	238.22810 Da 988.73 s	16.48	239.235	NA	NA	111992	209418	3266	189072	24244	57596	97000	508960	17072	279984	2082	108128	237648	559144	7406	10616	7290	61318	1262	301812	8350	113586	264528	235958	3.79914	154454	40655.1	33.4637	0
933	239.11367 Da 731.86 s	12.2	240.121	NA	NA	22388	49706	15124	54020	17332	56880	12602	30096	17366	24092	11436	90506	17322	37204	22576	51940	41554	166428	7016	19332	11682	34964	19734	117132	3.97599	43014	10818.4	3.40841	0
178	240.05952 Da 668.95 s	11.15	241.067	NA	NA	30114	8146	37398	12848	29728	23388	29454	13334	28672	24796	24662	5710	26242	12344	51054	29864	31218	10156	30278	26312	29760	8600	32900	17306	-7.2322	-15723	2174.03	0.50121	0
1120	240.13221 Da 791.81 s	13.2	241.139	NA	NA	29010	18392	41842	20854	32896	14550	20492	27116	23126	26996	24358	12008	34590	24766	29296	22460	26922	26580	20752	23832	29682	16666	30742	20992	-2.80482	-7374.67	2629.28	0.785079	2.89868
335	240.13240 Da 751.31 s	12.52	241.14	NA	NA	13860	8888	15248	8488	12786	9264	11344	9116	13950	13018	10652	3396	14896	11440	17786	9608	16656	11408	10422	10192	12114	0	14026	15466	-3.82839	-4454.67	1163.59	0.670982	0.610392
1096	240.16887 Da 784.02 s	13.07	241.176	N,N_-Dicyclohexylthiourea	C13H24N2S	24218	7770	21596	8568	15660	13418	15772	5026	16084	19298	10048	1752	14600	5414	24654	16804	25182	24142	14742	17870	10062	2670	18470	20818	-2.85881	-5628.17	1968.71	0.65692	2.89868
1719	240.20151 Da 903.44 s	15.06	239.194	NA	NA	6018	6606	1426	8472	3660	10210	5548	4774	0	8684	2088	2328	2234	9914	3338	0	6750	0	1790	7876	0	17252	6000	20332	2.27889	4799.67	2106.14	Inf	2.23926
1720	240.20205 Da 889.64 s	14.83	239.195	7-_2-hydroxypropan-2-yl_-1,4a-dimethyl-2,3,4,5,6,7,8,8a-octahydronaphthalen-1-ol	C15H28O2	0	15308	3610	3002	4844	2984	3650	12724	3690	7824	3180	35212	5638	12354	6526	9560	0	15764	3250	2550	1480	33552	3230	6406	2.82378	9845.17	3486.52	Inf	0.806589
1724	242.21748 Da 903.42 s	15.06	241.21	NA	NA	31364	66654	25904	7370	26316	46644	10240	49196	12142	54328	19470	78806	26112	53012	33482	49214	44386	64626	17972	0	22856	85912	34852	64108	3.544	26231.2	7401.56	2.33856	0
833	244.12790 Da 696.81 s	11.61	245.135	Etomidate	C14H16N2O2	3144	1316	1514	1986	2426	3988	5482	5058	6112	4466	5402	1396	3344	2848	4942	2866	5402	3020	6184	3998	4192	1268	4602	3676	-2.75999	-1405	509.059	0.752032	4.40945
1730	244.19619 Da 849.06 s	14.15	243.189	NA	NA	7672	8788	8270	12476	9766	6678	8586	11932	6228	9534	8240	9176	7334	9954	10462	12418	10012	15078	5858	6702	7790	20008	7812	8108	2.42601	2735.17	1127.43	1.34771	2.23926
66	245.16111 Da 572.32 s	9.54	246.168	NA	NA	3098	4154	2960	10550	2658	3394	990	4098	2318	3744	1874	18544	2504	5090	3142	3374	2570	14110	3332	6358	2470	9510	2568	3972	3.06165	4701.17	1535.5	3.14449	0.610392
1732	245.90802 Da 747.26 s	12.45	244.901	NA	NA	0	366	0	0	472	1236	686	4380	1552	4958	650	23948	510	8610	0	4252	2142	14798	746	2756	778	14456	716	3014	2.95394	6210.17	2102.33	NaN	0.806589
724	246.13517 Da 580.22 s	9.67	247.142	lenticin	C14H18N2O2	584	1176	596	1072	8054	9988	1994	6830	730	952	2308	30222	5834	19014	8708	10970	1206	6662	656	1374	1644	10748	2292	4466	2.40655	5739	2384.74	3.625	2.23926
1742	248.16969 Da 860.02 s	14.33	247.162	NA	NA	1332	1198	0	5576	1844	3426	1854	0	1702	3234	0	11256	914	4340	2152	1654	1502	2750	308	2058	2166	6396	1780	2526	2.25377	2405	1067.1	Inf	2.89868
1743	248.17015 Da 757.98 s	12.63	247.163	NA	NA	3158	3892	1244	3382	0	3004	1426	3660	1456	2164	1556	4928	1956	0	1520	2662	3094	3792	1234	2038	630	4034	2542	2944	2.72458	1390.33	510.293	Inf	0.878774
1748	250.14964 Da 812.24 s	13.54	249.142	8-hydroxy-11-_hydroxymethyl_-1,5,11-trimethyltricyclo_6.2.1.0_,_undec-2-en-9-one	C15H22O3	64620	86370	23894	49232	24670	65122	31524	86770	44430	95960	19296	52034	30986	43368	52492	60968	51330	94332	20864	48190	28306	38506	53740	46960	4.88301	26805	5489.44	1.88237	0
22	250.16665 Da 498.37 s	8.31	251.174	LID_251.1754_11.0	C14H22N2O2	5094	1202	2262	2302	2558	854	1376	710	6072	2260	0	1208	1956	652	1958	382	1648	246	1910	514	1510	492	1272	404	-2.86799	-1365.83	476.234	Inf	2.89868
1749	250.18572 Da 867.55 s	14.46	249.178	NA	NA	948	3516	678	6794	762	0	942	6328	646	2140	558	62010	938	10372	730	4564	838	12128	510	1158	574	62098	502	1404	2.06933	13657.2	6599.8	23.3269	2.89868
1384	250.18969 Da 970.95 s	16.18	273.179	NA	NA	5978	4608	3264	3202	4298	4952	2864	5160	3772	5172	2326	13736	3978	9234	4384	8986	5252	11258	2504	5110	3908	8192	4680	7800	3.22	3350.17	1040.42	2.02503	0.369028
1750	251.14474 Da 878.92 s	14.65	250.137	2,6-Di-tert-butyl-4-nitrophenol	C14H21NO3	5872	29966	3836	28386	5586	17174	6194	16206	6428	9812	4478	58446	4922	21318	5180	12878	8594	31942	4312	6322	0	63100	6404	31064	3.97692	22067.3	5548.85	Inf	0
969	256.06885 Da 746.67 s	12.44	257.076	NA	NA	2802	906	2960	2640	2260	1198	1674	1476	2148	1710	1324	536	1966	1534	2300	1402	2202	976	1794	1880	1800	428	1760	1810	-2.90915	-707.833	243.313	0.664596	2.89868
1761	256.08730 Da 601.19 s	10.02	255.08	NA	NA	712	920	750	978	660	0	0	6822	686	0	760	3474	1050	2678	2764	11914	1026	6032	840	740	580	6874	0	0	2.42316	2550.33	1052.48	NaN	2.23926
730	256.15346 Da 590.88 s	9.85	257.161	NA	NA	548956	381356	449424	499684	437554	419434	411130	281626	510750	621580	501432	245704	455098	446942	496710	286720	478320	69500	507264	468940	515936	312550	511758	423728	-2.71404	-113881	41959.9	0.76833	4.40945
1765	256.23226 Da 980.20 s	16.34	255.225	Palmitic acid	C16H32O2	470600	0	0	498550	185270	68854	603742	1569512	231130	719878	0	170106	0	1037266	0	366164	192494	0	0	1236492	0	181488	578808	560052	2.26812	345526	152341	Inf	2.23926
1766	256.23229 Da 990.00 s	16.5	255.225	Palmitic acid	C16H32O2	224458	1401476	48126	374970	82776	805778	596794	1291534	386982	804604	45280	367504	580998	539434	63536	363726	49744	381362	38980	879600	596196	437842	387304	81080	3.11691	385645	123727	6.16317	0.610392
1767	256.23244 Da 947.72 s	15.8	255.225	Palmitic acid	C16H32O2	55184	2505912	494098	69002	29448	59352	60138	2370352	66672	25864	536612	2560500	798436	57322	43120	856512	186212	887068	548494	62442	80980	1973406	65156	69386	2.10362	711047	338011	11.8656	2.89868
1415	256.23865 Da 1051.50 s	17.52	257.246	NA	NA	27626	46936	20444	44698	21506	21568	26920	104686	23048	46652	11318	57344	39834	146584	22784	19764	22588	29076	16568	99028	22802	38656	62052	48218	2.90387	32143.3	11069.1	2.51264	0.806589
1391	256.23870 Da 988.74 s	16.48	257.246	NA	NA	24826	52654	5054	44192	7214	15008	22532	111622	6988	59302	2246	23518	51236	127160	3282	6178	4310	15232	2062	63768	6440	26066	54682	54212	3.93465	34003.3	8642.03	6.72659	0
1775	258.17530 Da 812.70 s	13.55	257.168	NA	NA	12694	19240	9162	8918	13372	8178	10068	21628	8448	11474	10822	35514	13860	18398	9702	9722	8882	17522	12332	9534	9064	17940	10332	9140	2.02615	4872.5	2404.8	1.48566	4.40945
139	259.17679 Da 630.28 s	10.5	260.184	Hexanoyl-L-Carnitine	C13H25NO4	3068	13000	4158	18336	0	6254	1058	5726	2612	5012	5444	95578	2746	14536	3096	3374	5062	22628	4286	12480	2836	28440	2170	6846	2.30279	16306.2	7081.05	Inf	2.23926
832	260.07740 Da 698.33 s	11.64	261.085	NA	NA	0	0	0	0	1444	3166	2274	1546	4724	2276	8370	2262	5526	2482	8056	2210	7796	810	7418	5882	8192	1340	8666	4524	-3.2285	-2997.33	928.399	NaN	1.46653
1118	262.08085 Da 790.25 s	13.17	263.088	NA	NA	1904	1408	794	1590	948	1460	1700	4196	1584	3570	504	3056	2580	6190	2878	6416	7450	37082	2194	6452	1362	11274	1750	3456	2.07579	5041.83	2428.88	3.15556	2.89868
1785	264.10330 Da 595.22 s	9.92	263.096	Phenylacetylglutamine	C13H16N2O4	1172	8578	1178	302	1852	264	752	4342	1136	2446	1144	31544	1218	4136	742	3296	784	12080	460	958	186	20284	838	3392	2.35149	6680	2840.75	15.1374	2.23926
1787	264.16439 Da 823.32 s	13.72	263.157	NA	NA	2682	8408	1760	22224	3276	4322	3450	4772	2320	4456	1988	15014	2056	5472	3230	0	4668	12228	3078	3536	3508	7664	2180	3838	2.51238	4811.5	1915.12	3.19273	1.46653
599	264.20521 Da 949.83 s	15.83	265.212	NA	NA	3630	3384	1804	2498	2232	3450	1656	2670	2252	5210	1322	1512	1960	4904	2822	3026	3704	3774	1728	2868	1460	1286	3140	4624	2.50275	958	382.779	1.46155	1.46653
1790	266.10770 Da 806.21 s	13.44	265.1	NA	NA	18666	19356	13986	0	7594	1456	0	22008	0	14312	6198	30810	8992	23088	24230	27602	26298	32684	11248	0	546	32636	0	21900	2.06175	9007.83	4369.02	Inf	2.89868
1339	266.22079 Da 896.35 s	14.94	267.228	NA	NA	9494	7178	5272	7500	8144	20164	5522	9388	7790	32072	3786	9712	6370	15808	6326	7376	15406	6590	2642	9536	4886	8356	11580	12634	2.03245	4924.67	2423.02	1.96025	4.40945
1422	266.25941 Da 1071.07 s	17.85	267.267	NA	NA	43498	43680	692	42004	9830	20438	34678	128410	8420	66756	354	46346	58516	144154	3028	2824	2716	16710	414	81018	3164	40018	63872	52232	3.61487	37950.7	10498.5	35.4204	0
1798	268.12326 Da 775.20 s	12.92	267.116	NA	NA	1212	33956	1316	386	1218	0	0	42734	1290	12602	1504	270868	1864	24288	1180	72800	4768	234008	2562	0	0	251564	0	9952	2.53877	78020.3	30731.6	Inf	1.46653
1156	268.12721 Da 805.19 s	13.42	269.134	NA	NA	5816	3328	6094	3312	5804	2824	4504	4004	4718	5898	4156	3114	6180	4300	5742	5294	5656	3866	4548	4508	4754	1838	5986	5566	-2.96385	-1342.17	452.846	0.758299	2.89868
1799	268.15709 Da 858.83 s	14.31	267.15	NA	NA	3540	4828	2744	3254	3428	5834	3672	5494	2858	2776	2926	7856	2318	6234	4428	4916	4226	10024	1260	5022	0	0	4638	5566	3.31932	2147.17	646.87	NaN	0.369028
1383	269.27037 Da 969.88 s	16.16	292.26	NA	NA	7792	4486	9852	5160	9414	5456	6514	5108	8766	9004	7212	4506	8658	5902	9700	8160	10286	8328	8308	5848	8566	3494	7352	8704	-3.85962	-2355.33	610.25	0.728615	0.369028
165	270.10637 Da 649.06 s	10.82	271.114	Tolbutamide	C12H18N2O3S	7826	3862	7192	6194	7068	4902	6034	6206	10374	7370	11424	7318	6926	8330	8094	7072	8902	7200	7744	8814	9762	5268	9318	7238	-2.73849	-1740.83	635.691	0.813969	4.40945
1807	270.17510 Da 765.33 s	12.76	269.168	NA	NA	3262	3708	3076	3562	2892	2520	2500	3534	3174	3840	4136	9176	0	3984	3482	4652	3212	6206	3482	2912	2672	10120	3176	4118	2.51419	1939	771.222	Inf	1.46653
1810	272.07524 Da 580.50 s	9.68	271.068	NA	NA	0	0	320	0	0	0	176	3136	482	2874	562	21660	548	9134	0	8804	282	16156	0	0	142	31408	0	660	2.52442	7610	3014.55	NaN	1.46653
772	272.08197 Da 661.08 s	11.02	255.079	NA	NA	802	710	728	856	1006	3162	0	6924	1070	6954	1172	41976	820	22596	1174	27090	0	39900	762	832	886	54312	774	1312	2.91769	16452.5	5638.88	Inf	0.806589
364	272.08818 Da 773.23 s	12.89	273.095	NA	NA	45002	29508	36848	21958	35314	24820	41770	36030	35492	43954	21960	9560	44456	37262	43760	36212	43886	36272	33016	38860	31690	10398	41498	39594	-2.95695	-7522	2543.83	0.786852	2.89868
1813	272.19102 Da 781.56 s	13.03	271.184	NA	NA	3106	5892	4600	5102	2766	2366	3664	5618	2072	2888	5368	16442	4882	5674	3506	7716	4646	8630	4942	3234	2220	13398	2896	4374	2.42498	3055.5	1260.01	1.93933	2.23926
1814	272.22679 Da 837.90 s	13.97	271.22	NA	NA	50776	58146	47142	75164	63480	74024	61534	95180	50302	46594	34956	168594	41512	76592	57190	85022	58864	122136	35194	82286	65406	125022	59404	71084	3.56404	37840.3	10617.3	1.83788	0
523	273.13255 Da 880.86 s	14.68	274.14	NA	NA	1114	2732	866	2328	844	1628	780	1946	1038	2186	608	3834	1108	3230	926	1540	1808	3734	510	782	862	2790	1140	2968	5.08346	1507.83	296.616	2.66611	0
1315	274.21275 Da 876.60 s	14.61	297.202	NA	NA	644714	623932	578488	1024444	649118	597900	450942	1519546	506322	1186600	305324	541804	505820	1635630	751448	615434	467976	691082	243864	767412	496768	469936	839452	571880	2.37698	317114	133410	1.78759	2.23926
1416	274.24926 Da 1052.36 s	17.54	275.257	NA	NA	1876	3430	1226	2472	1792	1862	2528	5006	1254	3040	1014	3416	2130	10290	1732	1270	1386	1668	1262	6090	1484	1978	3708	2832	2.29716	1830.17	796.707	2.19559	2.23926
1392	274.24926 Da 987.61 s	16.46	275.257	NA	NA	1678	2912	640	2858	596	1094	1628	6250	0	4312	276	1366	3416	8152	0	544	0	1024	0	3508	546	1724	3962	3152	3.35499	2012.83	599.952	Inf	0
515	276.11104 Da 873.15 s	14.55	277.118	NA	NA	13496	8654	5268	11912	8108	10128	5854	9000	7528	15744	0	14374	8226	16684	7786	7990	10588	8912	2916	8204	6274	11870	7342	9052	2.63672	4094.83	1553	Inf	0.878774
1824	276.20004 Da 883.97 s	14.73	275.193	NA	NA	1460	4548	892	0	1236	0	0	7214	164	3756	1006	34030	926	6042	1628	4516	1862	6674	892	0	1072	30420	1204	414	2.07862	7106	3418.61	Inf	2.89868
827	278.07517 Da 694.95 s	11.58	279.082	Sulfamethazine	C12H14N4O2S	774	918	0	1400	608	878	2802	15716	998	1286	0	7782	1820	8838	6770	26368	2266	16278	1532	4044	1034	10964	758	920	3.2004	6335.83	1979.7	Inf	0.369028
1828	278.12758 Da 594.16 s	9.9	277.12	NA	NA	2172	2590	2182	2474	1906	2316	1620	3310	1694	2142	2014	4666	2196	2346	1884	2592	1956	4002	2056	2244	1728	3770	1730	2416	3.04604	977.5	320.909	1.52714	0.610392
1829	278.14321 Da 797.04 s	13.28	277.136	Di-n-butyl phthalate	C16H22O4	9002	11114	10888	58300	278342	1848300	613444	1582288	955748	1209604	1395484	5997014	1450928	3898282	1772340	2542468	2053912	1042752	1433916	1311226	1125782	3027496	1160166	1713012	2.33051	998492	428443	2.59009	2.23926
1837	282.17231 Da 862.52 s	14.38	281.165	NA	NA	2038	2586	1670	3610	2338	3440	1886	1534	1950	2264	0	3892	1654	3456	2602	2318	3124	3240	810	2238	2016	3722	2344	2626	2.50067	1041.17	416.354	Inf	1.46653
1838	282.21054 Da 843.90 s	14.06	281.203	NA	NA	1342	1474	1440	2152	1532	1342	1608	2078	1158	1458	1356	2100	1384	1568	1408	1918	1792	2080	1232	2184	1326	2138	1540	1530	2.40794	408.667	169.716	1.30027	2.23926
1845	284.11722 Da 684.72 s	11.41	283.11	NA	NA	5218	8638	3562	7114	3802	7580	0	6964	4294	4330	3602	16722	3652	7882	3848	5370	5564	13386	3972	4104	3430	12638	4846	7512	3.94384	4704.17	1192.79	Inf	0
1857	284.26272 Da 1061.84 s	17.7	283.255	Stearic acid	C18H36O2	400364	684716	56342	122880	51258	133802	478256	794926	49372	434616	43518	0	379688	793824	301106	268162	71010	224176	44704	674272	51174	277414	294078	414434	3.76713	216863	57567.1	3.75151	0
436	285.13476 Da 816.16 s	13.6	286.142	piperine	C17H19NO3	7288	3530	1120	8150	782	1808	0	1254	10972	43038	7420	79026	5950	45070	2772	814	1970	2632	8434	8728	1370	23432	2168	3040	2.11386	14189.7	6712.68	Inf	2.89868
788	285.19232 Da 667.22 s	11.12	286.2	NA	NA	8184	15028	2628	17592	3316	11662	476	3304	2662	4252	2830	32640	1306	8514	2910	8536	7162	40512	5388	7496	2494	33984	2908	9634	3.56497	12574.2	3527.15	5.46323	0
128	286.09131 Da 620.94 s	10.35	287.099	_2R,3R_-3,7-dihydroxy-6-methoxy-2-phenyl-2,3-dihydrochromen-4-one	C16H14O5	1062	6574	1994	4816	1770	4456	676	3966	1330	2494	874	33348	1296	4610	640	2440	838	12284	504	1186	1700	14014	558	3312	2.52315	6688.17	2650.72	7.96509	1.46653
1864	286.24197 Da 853.59 s	14.23	285.235	NA	NA	3578	5492	4166	5448	4354	6324	5958	7756	4978	5238	0	8962	4088	5324	4500	6940	4566	6722	0	5242	4488	5858	5686	6082	3.15902	2418.83	765.691	Inf	0.369028
205	287.20798 Da 696.16 s	11.6	288.215	Octanoyl-L-Carnitine	C15H29NO4	3898	16296	5008	51052	2850	6824	1984	17366	5622	13326	7554	109044	4860	32456	7370	8468	15864	49472	10798	34106	3316	60748	3286	13154	3.38568	28325.2	8366.16	6.56289	0
344	287.28081 Da 760.35 s	12.67	288.288	C17-Sphinganine	C17H37NO2	3842	4172	3744	9664	4458	2820	2658	7470	2362	7464	2908	9954	3860	13510	4716	2958	3354	4302	2438	3866	4584	3216	4168	3632	2.11351	2494.67	1180.34	1.85514	2.89868
1371	287.91320 Da 941.93 s	15.7	288.92	NA	NA	4998	3318	4924	3022	4162	2686	3844	3664	4468	0	2402	1802	5280	3126	4608	3846	4878	4034	3218	3388	5006	0	4234	4178	-2.89772	-1579.83	545.199	0.659967	2.89868
1227	290.11141 Da 831.78 s	13.86	291.119	dehydrocurvularin	C16H18O5	1196	10294	766	31476	1028	6272	432	16172	1398	16388	652	53376	746	20952	1192	37474	5566	105162	996	14904	1074	41876	662	8168	3.71686	28900.5	7775.51	27.6277	0
746	292.17594 Da 627.87 s	10.46	293.183	NA	NA	3658	774	2868	1260	2440	1652	3476	0	3936	3684	4142	252	2930	0	2884	0	2272	0	5344	3440	4968	4112	3272	0	-5.53969	-2251.33	406.401	0.31635	0
1881	294.17419 Da 778.21 s	12.97	293.167	Cinchonidine	C19H22N2O	303024	630198	252392	5196	261938	2686	124164	327710	97360	185922	135808	801114	162938	337606	169544	324876	213096	608874	115910	182728	158514	661124	173870	385674	2.43588	190429	78176.7	2.28077	2.23926
1182	294.17986 Da 813.11 s	13.55	295.187	_6_-Gingerol	C17H26O4	11510	11266	8436	11242	9066	9272	9568	12904	9248	15374	7130	11186	13282	15284	12850	11928	12624	26008	7654	11852	8290	10322	13852	16672	2.88175	3316.67	1150.92	1.33754	0.806589
657	294.18184 Da 1052.83 s	17.55	295.189	NA	NA	2140	2852	1906	2806	1664	1634	2956	4010	1784	2930	994	2102	2876	3562	1958	1944	2184	3184	1288	2784	2780	1838	2168	2532	2.36644	623.333	263.405	1.38169	2.23926
1888	296.18774 Da 902.89 s	15.05	295.18	NA	NA	2320	7612	1258	1764	1650	1464	1920	8682	1034	5100	980	17804	2222	9728	2004	5326	2330	5910	1162	0	0	11246	0	0	3.03708	4813	1584.75	NaN	0.610392
1889	296.22607 Da 840.86 s	14.01	295.219	12,13-EODE	C18H32O3	14968	21886	11806	27406	24236	7254	14468	46336	13166	27466	10228	81580	8008	27670	12908	17462	9876	31598	5336	14304	10000	76950	10378	10602	2.71741	20428	7517.45	3.06272	0.878774
72	297.08781 Da 580.01 s	9.67	298.095	NA	NA	3960	3910	2902	6770	2852	3404	1408	3428	2008	2668	1434	6494	1742	4292	4374	4530	2842	2452	1442	3818	2152	3386	2054	5564	3.16614	1795.5	567.095	2.00817	0.369028
1892	298.20513 Da 801.61 s	13.36	297.198	NA	NA	1660	3624	1488	2568	1768	2898	2450	2896	3556	4062	9962	13074	3230	4148	2568	7684	3962	9560	2056	2256	2070	14170	1876	2654	2.57627	2745.67	1065.75	2.10263	1.46653
1893	298.24174 Da 854.18 s	14.24	297.234	Lichesterylic acid	C18H34O3	23618	44754	20082	23646	22226	24170	14548	46206	16584	29506	0	152140	17158	54124	21114	29612	18730	61466	7516	48576	16758	106862	22204	33394	2.99683	37826.5	12622.2	Inf	0.610392
1898	300.22085 Da 808.37 s	13.47	299.214	NA	NA	4676	4850	4048	4384	3392	5580	4200	5206	5522	5466	4882	6600	4590	5808	3208	4178	2998	7766	4838	5356	3776	5852	3860	3772	2.68376	1235.67	460.424	1.34489	0.878774
1899	300.25719 Da 868.49 s	14.47	299.25	12-Hydroxyoctadecanoic acid	C18H36O3	12068	33924	8658	3874	13378	21382	13982	27224	10448	21292	5544	74362	11134	23552	13478	21580	13434	37004	5842	23578	11606	41348	13788	21488	3.37865	18104	5358.35	3.1569	0
35	301.18731 Da 531.21 s	8.85	302.195	NA	NA	13450	12542	11898	31904	13050	12296	9208	25476	10622	15564	8922	38478	13688	20066	17742	16598	14014	22330	10340	13564	10858	16288	12052	16538	2.87197	7983.33	2779.74	1.77332	0.806589
1904	302.21561 Da 903.10 s	15.05	301.208	NA	NA	2216	3484	392	0	992	0	0	26926	526	4614	516	99724	576	16150	1558	4716	1468	9136	304	1984	434	89534	0	0	2.00615	20607.2	10272	NaN	4.40945
1361	302.24389 Da 925.76 s	15.43	325.233	GLYCEROL-MYRISTATE	C17H34O4	276124	827614	65454	1035626	212790	286678	143092	2641700	75846	819978	40864	527086	440108	3133810	78858	258280	57858	489372	20920	1429046	97560	454546	910090	597322	3.13135	840124	268295	12.9014	0.369028
345	302.97161 Da 761.59 s	12.69	303.979	NA	NA	16138	8924	16948	7476	14838	7052	8914	9674	9898	13302	8304	2398	11508	9892	13318	9792	15038	9454	6888	10818	9856	954	13640	10280	-2.71319	-3772.67	1390.49	0.735985	4.40945
760	303.20294 Da 646.25 s	10.77	304.21	NA	NA	1672	3334	1682	4450	1800	1606	1294	3996	1912	2422	2452	7044	1754	5054	3380	1834	2848	3376	2566	5702	1998	8860	1804	3000	2.93752	2126.33	723.853	2.1407	0.806589
1353	304.25927 Da 919.35 s	15.32	327.249	NA	NA	164226	115838	173142	91934	146966	103972	133360	157218	148894	120702	131880	73276	159600	116830	154634	134164	168302	102612	111444	135892	162836	79066	151460	142366	-3.45173	-36072.8	10450.7	0.778599	0.878774
1400	305.26752 Da 1003.05 s	16.72	306.275	NA	NA	1582	1246	2682	898	1778	1074	1702	0	2294	1212	1320	478	2550	0	1606	1602	1850	1112	1196	0	2808	1686	568	1378	-2.92469	-937.5	320.547	0.603501	2.89868
787	306.10596 Da 668.57 s	11.14	307.113	NA	NA	10066	12104	8734	18308	9914	11464	7290	11602	7706	10982	6064	38044	7732	17126	8546	14318	13200	24116	7222	9212	7028	16348	8766	19854	3.43756	8434.17	2453.54	2.11077	0
1013	310.13765 Da 757.19 s	12.62	311.145	NA	NA	6500	4046	6956	4476	6798	3506	4428	4232	5466	6674	4130	1498	5952	5204	6686	5502	8016	4152	4038	5726	5092	0	7062	4864	-2.73379	-1770.33	647.574	0.72026	4.40945
1924	310.16874 Da 779.22 s	12.99	309.161	NA	NA	16044	37944	12332	3146	11252	0	7586	26288	7110	15934	8804	51794	9854	29026	11466	29196	14638	34130	7660	12440	2410	52366	8730	33930	3.29676	17359	5265.47	4.10602	0.369028
1926	310.20256 Da 910.89 s	15.18	309.195	NA	NA	1926	1722	1300	1254	1216	3056	1408	2282	2052	2908	1022	2822	0	3894	1786	2526	1910	3402	982	3194	1750	5178	1856	2756	3.45487	1482.17	429.008	Inf	0
591	310.24677 Da 939.72 s	15.66	311.254	NA	NA	5812	5116	4428	7768	5550	8214	3158	8252	3700	15462	3638	6834	4974	9788	4514	4838	5760	5546	3060	6030	3770	5630	6186	6302	2.81507	2935.83	1042.9	1.77251	0.806589
224	311.20888 Da 704.92 s	11.75	312.216	NA	NA	672	2278	738	6934	1074	1430	562	4414	654	1630	750	6970	1048	5690	0	2570	1246	5512	1920	4108	532	8462	498	1558	4.54159	3488.5	768.124	Inf	0
1930	312.14166 Da 706.82 s	11.78	311.134	NA	NA	0	0	1064	736	0	0	0	2024	0	0	0	33176	0	3546	0	5420	0	44132	0	0	1104	62436	0	876	2.01569	12514.8	6208.71	NaN	4.40945
1333	312.22619 Da 892.51 s	14.88	313.233	_9Z,12E_-15,16-dihydroxyoctadeca-9,12-dienoic acid	C18H32O4	37360	30118	24226	32868	35594	35788	27382	45238	28084	67196	16218	39244	31710	50418	21794	32540	40632	35246	15152	34742	26434	30034	37466	43234	2.8895	11217.8	3882.28	1.51387	0.806589
1934	312.25643 Da 857.10 s	14.28	311.249	NA	NA	0	3380	2064	3736	2650	2822	2602	3322	3722	2810	0	4656	0	4238	2652	3656	0	3748	2060	3220	2946	3464	2592	0	2.12168	1480.33	697.718	Inf	2.89868
896	313.22381 Da 723.68 s	12.06	314.231	NA	NA	2926	17300	2576	58270	2876	7712	1236	13866	3724	11608	2946	74016	3456	22460	4310	11470	10716	65406	6254	25816	2786	54096	2114	7784	3.86456	26990.3	6984.06	9.43041	0
443	314.02323 Da 817.03 s	13.62	315.031	NA	NA	6420	3180	7458	3226	6386	2652	2508	2272	4874	3486	4536	2534	4500	3984	5254	3192	4656	3782	3194	3460	4242	1302	3572	3486	-3.45829	-1753.67	507.091	0.682852	0.878774
83	314.11203 Da 591.32 s	9.86	315.119	NA	NA	8176	4876	7592	7608	7048	5472	4520	3030	7906	8738	9688	3262	6374	6390	8192	2936	6786	410	8146	6288	8150	2812	8002	5624	-3.42369	-2761.17	806.488	0.644022	0.878774
1935	314.11752 Da 784.74 s	13.08	313.11	NA	NA	0	3452	0	6356	0	1420	260	8298	0	1742	0	23974	698	9068	842	15020	738	2780	456	330	0	26028	356	2380	3.09799	8124.83	2622.62	Inf	0.610392
1319	314.18358 Da 879.08 s	14.65	315.191	1,4a-dimethyl-9-oxo-7-propan-2-yl-3,4,10,10a-tetrahydro-2H-phenanthrene-1-carboxylic acid	C20H26O3	25078	27454	16488	36030	17022	28368	12246	28644	12588	52616	12512	51200	18438	42566	15694	14350	17556	20010	10590	15812	17268	32014	20866	20224	3.45159	14411.8	4175.42	2.01971	0
1938	314.18979 Da 949.17 s	15.82	313.183	NA	NA	570	20688	6120	750	566	1396	1552	18790	1302	14220	7848	16592	8934	0	1004	9140	2640	9854	6782	878	1454	14214	1224	982	2.00363	5625.67	2807.73	7.29752	4.40945
1941	314.27220 Da 863.79 s	14.4	313.265	NA	NA	2734	3992	1980	2266	2596	1574	2350	2616	1794	2328	1572	2748	2462	2504	2510	2736	2458	2768	1396	2634	1572	3208	2540	3100	1.98116	542.5	273.83	1.31259	4.40945
320	315.23917 Da 739.82 s	12.33	316.246	Decanoyl-L-Carnitine	C17H33NO4	7124	62268	12804	203844	8092	18182	3982	51684	13566	49964	20558	303372	14326	85644	18752	29896	58178	125904	21224	154132	12406	149388	6556	31040	3.72124	88979.2	23911.1	7.67518	0
1165	315.27584 Da 807.63 s	13.46	338.265	NA	NA	14784	10064	18152	12110	12910	8450	10680	10928	13322	12076	8098	6008	11286	8038	11438	8868	12330	10294	6906	10660	15018	8356	10908	10254	-2.75424	-2477.17	899.402	0.83637	4.40945
1178	316.16336 Da 810.62 s	13.51	317.171	NA	NA	47726	66518	55304	73830	37712	28800	23070	37470	21550	39618	21250	72916	30098	50196	29668	43946	42266	112542	20340	30690	24686	42620	35896	61404	3.82913	22582	5897.42	1.762	0
1952	316.25154 Da 831.35 s	13.86	315.244	NA	NA	6626	5408	4706	23276	26414	86816	59788	209930	52664	50592	58044	203066	40174	91314	57764	84610	70004	63032	69722	66344	89466	143138	86736	91344	2.59497	41396.8	15952.8	2.10517	1.46653
1957	318.20979 Da 862.71 s	14.38	317.203	_E_-5-_1,2,4a,5-tetramethyl-7-oxo-3,4,8,8a-tetrahydro-2H-naphthalen-1-yl_-3-methylpent-2-enoic acid	C20H30O3	2720	4924	1608	3788	3532	3668	1964	4268	1322	4568	1622	6742	1700	5054	2898	1678	1706	2552	1790	2154	1662	5714	3458	3430	3.06339	1879.83	613.644	2.13923	0.610392
1285	320.13706 Da 853.47 s	14.22	321.144	NA	NA	5624	5940	3468	7704	5860	9152	2492	7052	3100	11884	2116	6970	3564	8534	3864	4970	5384	3996	1534	5370	3438	4956	3948	5448	3.70381	3132	845.615	2.12849	0
1332	320.23115 Da 890.60 s	14.84	321.238	NCGC00180747-02_5-_1S,2R,4aR_-1,2,4a,5-tetramethyl-7-oxo-3,4,8,8a-tetrahydro-2H-naphthalen-1-yl_-3-methylpentanoic acid	C20H32O3	11070	11788	7864	13444	9670	7030	6300	13806	7630	18072	5058	21206	9072	15490	6384	8780	7652	13728	5034	20674	7590	15830	9734	13652	4.02269	6703.5	1666.42	2.06048	0
801	322.10101 Da 680.34 s	11.34	323.108	NA	NA	2792	6770	2528	9894	2990	3756	1726	7652	2658	3132	1642	24706	2366	4448	2964	4094	3356	6854	2766	2858	2786	5800	3838	6182	2.39136	4477.83	1872.5	3.19017	2.23926
1376	322.18882 Da 952.11 s	15.87	323.196	NA	NA	8648	34562	3762	4852	5060	8020	4146	5018	2282	8026	2102	2220	2856	12230	7134	3858	4572	9396	2674	8648	5264	2128	3240	15170	2.19188	5199	2371.94	2.32112	2.89868
1345	322.24660 Da 911.39 s	15.19	323.254	_1R,4aS,5R,8aS_-5-_5-hydroxy-3-methylpentyl_-1,4a-dimethyl-6-methylidene-3,4,5,7,8,8a-hexahydro-2H-naphthalene-1-carboxylic acid	C20H34O3	5404	8568	3298	5378	4900	5684	2984	10274	3004	9226	2380	5840	3238	10546	5196	5654	4492	7444	2176	7092	3284	2556	6184	9008	4.1163	3394.17	824.568	2.07006	0
441	324.05197 Da 816.90 s	13.61	325.059	NA	NA	7104	2970	8220	3972	7972	2880	2564	2294	5610	4410	4648	2772	5618	3718	4772	3842	5226	3572	3852	3696	4130	1482	4094	3664	-3.73416	-2044.83	547.602	0.658621	0.610392
86	324.14095 Da 591.52 s	9.86	325.148	NA	NA	4586	3538	3650	4420	3802	2970	2720	1730	4438	4556	3818	1070	3682	3466	4038	1970	3908	0	4310	4294	4112	1726	4422	2902	-2.69529	-1237	458.948	0.683998	4.40945
608	324.20403 Da 967.38 s	16.12	325.211	NA	NA	2340	6680	730	3706	934	2698	868	5858	856	2104	2080	8216	642	6994	1086	1684	1066	2372	2418	804	884	6656	0	1718	3.70801	2965.5	799.755	Inf	0
1982	326.19931 Da 748.55 s	12.48	325.192	NA	NA	2618	2242	1954	4666	38326	556834	136214	154640	320816	288378	294970	1052402	306536	876610	315214	637312	354142	175828	120008	211986	4114	744136	218882	325004	2.58703	243020	93938.1	17.7403	1.46653
471	328.03890 Da 839.11 s	13.99	329.046	NA	NA	6610	4420	9774	5930	8486	4744	4800	4954	8062	7530	8358	4432	8322	7610	7806	6100	8184	4300	7038	5260	6764	2294	6640	6938	-3.84999	-2194.33	569.958	0.723626	0.369028
1989	328.17899 Da 746.92 s	12.45	327.172	NA	NA	4382	7360	4806	2690	4230	2446	2510	4490	2254	3482	2798	5466	2466	4124	2352	4048	3270	5104	2624	2870	0	6762	3900	4754	2.05957	1500.33	728.471	Inf	2.89868
901	328.18430 Da 726.59 s	12.11	329.192	NA	NA	17856	11442	15258	10330	16446	12700	14872	13714	14224	14310	14318	5676	17038	14246	16232	13602	18122	12464	9958	14338	15688	3192	16190	15818	-2.75882	-3697.5	1340.25	0.783073	4.40945
1340	328.19944 Da 897.03 s	14.95	329.207	NA	NA	3994	7958	2188	14864	3438	16242	2520	9798	2330	16884	2036	12994	3022	14084	2114	3514	3428	3904	2102	3428	2792	11874	4394	4808	4.42351	7166.17	1620.02	3.78885	0
1990	328.21467 Da 745.12 s	12.42	327.207	NA	NA	0	0	0	0	9840	0	30784	77696	51954	51118	45346	163006	43792	125332	60926	105376	62802	59408	32138	45494	6990	157590	53146	94748	2.6525	40170.8	15144.5	NaN	0.878774
1993	330.15012 Da 779.93 s	13	329.143	NA	NA	7442	10534	5562	24050	6594	10684	3048	5828	3772	4088	2578	16538	3420	7104	4368	5256	5730	8646	2244	4482	6354	10592	5018	8504	3.05384	5014.67	1642.08	2.24325	0.610392
1255	330.17884 Da 839.41 s	13.99	331.186	NA	NA	16370	22344	10686	19658	12820	42768	9048	18402	11774	33022	10132	13158	14586	31708	15030	17952	29086	23440	4328	17270	8058	31126	17496	32288	4.06801	11976.8	2944.15	2.21253	0
952	330.20012 Da 740.37 s	12.34	331.207	NA	NA	111104	61762	109124	58092	103570	70012	93676	93824	100906	104014	87346	43886	112260	94580	115552	92518	120616	88314	76670	107872	100594	20200	115918	104962	-2.97332	-25608.3	8612.71	0.765639	2.89868
1997	330.23039 Da 794.51 s	13.24	329.223	NA	NA	3236	3820	2648	9534	80462	301544	103900	521738	183162	169262	309640	388144	75674	283516	134462	295548	221038	116270	239882	132240	238436	460852	279198	347484	2.15524	96517.8	44783	2.16058	2.89868
1999	330.26694 Da 988.37 s	16.47	329.26	NA	NA	1230	30438	0	9512	272	4920	0	38732	0	15722	0	4864	6532	17180	362	5798	0	4588	0	8150	0	5252	374	716	3.40333	11425.2	3357.05	Inf	0
1389	330.27502 Da 988.51 s	16.48	353.264	NCGC00186665-03_2,3-dihydroxypropyl hexadecanoate	C19H38O4	1709776	2266858	177414	2649990	687016	830138	1015252	6709588	511616	3088564	112254	1749538	2803528	7990830	279446	377066	339414	909882	49200	6312946	330996	1379410	3668210	2800350	3.06521	2.11509e+06	690029	15.4854	0.610392
860	331.23402 Da 706.87 s	11.78	332.241	NA	NA	680	2488	784	7604	704	1334	584	3038	776	1752	1718	7000	1336	6076	1692	1454	2092	2968	2326	5862	1654	8246	1210	1850	3.62469	2843	784.343	3.55397	0
2000	332.12785 Da 702.33 s	11.71	331.121	NA	NA	0	2846	0	0	0	1282	0	4226	0	0	0	43654	0	5434	0	8960	0	3402	462	654	0	44610	0	1080	2.01686	9640.5	4779.97	NaN	4.40945
300	332.13489 Da 728.67 s	12.14	333.142	NA	NA	0	2062	0	7228	0	1040	0	4060	0	882	0	27930	0	5662	0	7518	0	3668	0	0	0	14660	0	1060	2.67327	6314.17	2361.97	NaN	0.878774
1288	334.15324 Da 855.09 s	14.25	335.161	NA	NA	2136	1882	1458	2936	1802	1974	1094	1672	1168	3766	580	1432	1112	2544	1268	1074	1442	1498	538	1846	1180	1312	1360	1654	2.23668	704.333	314.901	1.76206	2.89868
1330	334.27022 Da 892.49 s	14.87	357.259	NA	NA	21096	18148	14944	19448	21556	20252	18636	24228	21138	40448	11220	22520	19762	31400	15814	20416	22704	17814	10034	22074	17030	15626	24458	26886	2.32985	5072.33	2177.11	1.35026	2.23926
447	336.09577 Da 820.37 s	13.67	337.103	NA	NA	9488	6024	9760	7254	10060	6030	8842	8124	9850	8300	7274	8240	8860	7452	10334	8418	10102	9512	7354	9062	10084	5492	9314	7192	-2.76139	-1685.17	610.261	0.834842	4.40945
1311	336.16829 Da 870.16 s	14.5	337.176	NA	NA	15582	5004	7654	5202	18926	17680	2564	0	4024	4150	4362	3148	4064	3796	5636	0	8776	1702	12146	9580	7846	1684	8124	6856	-3.38777	-3408.5	1006.12	0.555269	0.878774
2008	337.32443 Da 1151.43 s	19.19	336.317	NA	NA	3812	55872	1604	2846	1410	3376	978	88642	966	40622	1438	4584	20462	57060	1118	7564	1028	9014	0	8956	600	8504	1724	1944	2.66077	21153.7	7950.2	Inf	0.878774
469	338.06774 Da 838.98 s	13.98	339.075	NA	NA	12602	6310	11670	6868	12930	5978	7154	7530	10542	10578	11466	5700	10086	12094	13178	9056	14122	6832	9740	8286	9552	2748	11172	9906	-3.46317	-3527.33	1018.53	0.708319	0.878774
2010	338.19671 Da 837.22 s	13.95	337.189	NA	NA	1300	1706	912	1884	1374	1938	1428	1744	1208	1306	992	2044	1168	1524	1872	1798	1298	1810	0	1668	1700	1412	1336	1236	1.99675	456.833	228.789	Inf	4.40945
2012	338.23360 Da 948.46 s	15.81	337.226	NA	NA	1170	10942	3390	1762	0	1296	1030	10066	0	8194	3690	12954	4926	0	0	5498	0	5450	4010	0	1076	8726	1164	0	2.24487	3702.67	1649.39	Inf	2.89868
603	338.24152 Da 955.66 s	15.93	339.249	NA	NA	9858	34744	1194	27504	3538	7406	6852	167596	2138	30698	1110	15496	23726	187266	2052	2990	1544	9730	890	91410	1800	11568	56422	25350	2.29301	41719.5	18194.2	17.2222	2.23926
328	339.23928 Da 746.48 s	12.44	340.247	NA	NA	0	1924	384	8398	432	828	0	1788	564	1540	0	6472	658	3518	410	1638	1144	5150	722	2626	0	6108	0	688	3.77929	3030.33	801.826	Inf	0
1059	340.11164 Da 773.23 s	12.89	341.119	NA	NA	425656	237648	435516	165220	373242	237042	310798	288652	348990	399794	270656	68232	381896	332902	451514	324784	456618	252600	301634	364966	297212	54932	385388	394256	-3.26165	-109841	33676.5	0.705101	1.46653
609	340.15846 Da 971.73 s	16.2	341.166	_2R,3S,4S,5R,6S_-2-_hydroxymethyl_-6-_4-hydroxy-2-_3-methylbut-2-enyl_phenoxy_oxane-3,4,5-triol	C17H24O7	1620	1040	844	1056	866	1194	698	1356	762	1052	744	2930	954	2252	886	1684	1160	2550	604	928	674	1546	1088	1776	2.60775	705.333	270.476	1.87129	1.46653
1194	340.18576 Da 815.24 s	13.59	341.193	NA	NA	3122	3392	1906	3232	1716	2102	2374	3006	2070	4028	1488	3836	2746	3312	3232	3086	3042	4710	2186	3306	2362	3010	2832	3302	3.28926	937.167	284.917	1.45493	0.369028
2020	340.25075 Da 843.77 s	14.06	339.243	NA	NA	1486	5782	0	2922	1522	2064	0	2760	1490	2080	958	22316	1608	6040	1594	5426	1566	18218	0	2864	0	18720	1534	1914	2.91923	6612.33	2265.09	Inf	0.806589
2021	340.28732 Da 887.71 s	14.8	339.28	NA	NA	2372	6126	2552	0	2692	3056	2560	3596	2520	3904	2800	7258	3384	4586	0	4712	3262	4378	3164	3406	1722	5390	3434	4972	2.60053	1743.5	670.441	Inf	1.46653
1014	341.25493 Da 757.33 s	12.62	342.262	NA	NA	2464	25260	5326	70546	2612	7662	1438	18440	3482	14772	5928	44156	5542	31538	5758	7166	12288	19482	4508	57920	6210	42344	2554	12438	4.15218	24467.8	5892.76	7.00023	0
2028	342.22941 Da 805.38 s	13.42	341.222	NA	NA	3252	3556	3014	3708	3686	3968	2990	4290	2440	3988	2790	3108	3188	2986	2512	3626	3680	3308	3072	3112	3880	4036	0	2702	2.05012	657	320.468	Inf	4.40945
360	343.27031 Da 770.76 s	12.85	344.278	LAUROYLCARNITINE	C19H37NO4	4070	45910	11540	101634	4220	15298	2598	41748	8160	41958	15190	102020	12390	89698	12982	15660	30930	47442	13930	121444	14174	91770	5388	23366	4.82065	50198	10413.1	6.7624	0
1409	344.29093 Da 1026.56 s	17.11	367.28	NA	NA	16006	28752	444	33758	3712	5984	8244	98640	2356	29378	576	12978	28116	162566	1238	1470	1434	4926	320	73234	940	8826	55314	28400	2.32	30851	13297.8	31.2974	2.23926
1271	346.27015 Da 849.57 s	14.16	369.26	NA	NA	22776	26166	20032	36170	29692	26992	15728	35932	16576	55808	13590	24154	10870	49854	28118	19866	22546	24632	11840	36332	21366	17794	27254	31166	2.56758	12039.8	4689.18	1.89355	1.46653
640	347.30181 Da 989.43 s	16.49	348.309	NA	NA	3976	6282	378	5250	1382	1890	3052	13412	1188	7438	0	2516	6538	15058	486	684	446	2404	0	10526	668	3456	7584	6910	3.49089	4177.33	1196.64	Inf	0
2051	350.27248 Da 988.69 s	16.48	349.265	NA	NA	2176	28232	534	4640	528	5092	0	32258	0	12084	256	5548	10020	13722	530	6948	0	6682	0	8202	0	6088	1062	710	3.35007	9591.67	2863.12	Inf	0
2055	353.85855 Da 134.07 s	2.23	352.851	NA	NA	1720	2134	2224	3502	2054	2302	2014	2744	1374	2404	1874	2160	2216	1752	1676	2292	2000	2020	1940	2004	2184	2492	1764	2174	2.03706	411.667	202.088	1.23128	4.40945
1299	354.19539 Da 864.12 s	14.4	355.203	NA	NA	2206	2036	1130	1444	1702	1868	1244	2884	1378	4218	0	1594	1274	3714	1676	1900	1490	1686	866	2688	1500	1546	1816	2112	2.56717	950.667	370.317	Inf	1.46653
2061	354.26589 Da 850.67 s	14.18	353.259	NA	NA	1390	3916	1600	1852	2356	1618	1352	2866	1552	1800	0	8602	1682	2294	1794	3308	1498	5702	1010	1966	1136	12884	1816	1880	2.24614	2625.17	1168.75	Inf	2.89868
2068	356.16448 Da 838.98 s	13.98	355.157	NA	NA	5202	9826	5096	5078	4862	1400	4584	10150	876	4800	2498	11926	4068	9084	4530	6838	3730	9804	2828	3426	700	6828	5884	6894	3.19701	3433	1073.81	2.8458	0.369028
2070	356.24527 Da 811.06 s	13.52	355.238	NA	NA	2050	2386	1204	2064	1682	0	1790	2384	1948	1978	1668	3474	0	2530	1630	2628	1798	2856	0	1688	1670	4670	1750	1654	2.15157	926.833	430.771	Inf	2.89868
1405	356.29090 Da 1011.76 s	16.86	379.28	MAG	C21H40O4	32628	79418	1384	100474	5760	14284	17098	377984	5530	87870	994	106618	63192	623186	2346	7302	2762	21762	738	257048	2648	86702	118396	72430	2.59099	131800	50868.6	52.1067	1.46653
1317	358.16510 Da 875.73 s	14.6	359.172	NA	NA	1582	2072	1802	2732	1728	2114	2160	4816	1480	3516	764	1046	1830	2874	2068	1798	1356	2502	872	1818	1578	1374	2318	1976	2.28731	758.333	331.539	1.50973	2.23926
2077	358.29754 Da 1060.54 s	17.68	357.29	NA	NA	956	12496	0	2942	0	1408	0	14412	0	5154	0	2712	4102	6668	402	2716	0	2130	0	3794	0	2660	274	320	3.30874	4306.5	1301.55	Inf	0.369028
1420	358.30630 Da 1070.87 s	17.85	381.296	1-Monostearin	C21H42O4	773418	761518	42576	810246	409598	397478	461944	1818926	342226	996918	34258	896506	1108694	3006602	212280	159602	216550	396768	17408	1924160	185420	604804	1256728	837280	2.83909	629142	221600	14.4802	0.806589
977	359.26537 Da 749.06 s	12.48	360.273	NA	NA	702	4664	1336	11752	822	1204	444	3980	1412	3942	1936	7638	1384	8458	1338	2148	3362	4666	1858	9650	1918	7246	1138	2150	4.21315	4154	985.961	4.38095	0
1318	364.18264 Da 876.28 s	14.6	365.19	NA	NA	4304	4872	3750	9526	4596	4340	2474	14818	3750	9866	3126	3162	3854	17618	6362	4690	2774	5884	1428	6146	3616	2748	5738	5268	2.30739	3597.17	1558.98	2.30501	2.23926
1262	366.23635 Da 844.14 s	14.07	367.244	NA	NA	6324	5280	5174	12004	6996	6800	6806	19044	6162	13094	5726	8904	7452	23858	8718	7920	7564	9300	4930	11526	9390	7876	10868	13886	2.63698	4448.5	1686.97	1.69991	0.878774
2092	366.24238 Da 988.39 s	16.47	365.235	NA	NA	32374	98396	2144	106178	7898	71966	1844	124660	3340	87128	0	51882	45806	89724	11934	33876	1296	31312	1008	60466	3616	50254	23364	13706	5.48561	57077	10404.9	Inf	0
2093	366.26574 Da 846.87 s	14.11	365.258	NA	NA	772	8232	618	1926	1066	0	1010	7100	942	3496	936	93298	852	10160	1252	6318	1750	54788	0	0	708	16376	994	4374	1.99341	16264	8158.89	NaN	4.40945
1052	367.26941 Da 770.47 s	12.84	368.277	NA	NA	0	16696	3874	43242	0	8102	0	12886	0	10920	2974	40896	0	24532	4640	6954	5482	16352	3490	18984	0	43626	0	6544	4.65719	19106.2	4102.51	Inf	0
2094	368.15453 Da 755.89 s	12.6	367.147	_2S_-8-_E_-3-hydroxy-3-methylbut-1-enyl_-5,7-dimethoxy-2-phenyl-2,3-dihydrochromen-4-one	C22H24O5	20104	340760	9636	0	15754	0	14202	264962	31238	314550	24568	3071404	26706	561540	19760	663664	23380	580634	11472	133682	14114	828196	6650	30098	2.27878	547659	240329	27.0832	2.23926
2097	368.28106 Da 858.80 s	14.31	367.274	NA	NA	1864	6028	2508	2588	2752	1584	1710	4206	1618	3688	1630	5460	2540	3426	2076	4336	1748	4468	1606	2012	1688	5810	1710	2540	3.3699	1891.33	561.243	2.09198	0
1100	369.28603 Da 783.11 s	13.05	370.293	NA	NA	5136	90306	10500	298636	5844	38376	2290	62764	8684	75084	15812	294888	8104	166814	18300	24448	25912	35782	8774	160114	14064	192236	4918	39342	3.95312	112538	28468	14.2094	0
2100	370.17022 Da 780.78 s	13.01	369.163	NA	NA	5670	90490	3766	297100	2090	4936	2806	53254	23408	273714	8416	1118420	14268	327594	5812	120390	9634	75518	5362	116930	3230	524052	1876	13688	2.70367	244146	90301.5	41.9697	0.878774
512	370.23122 Da 867.60 s	14.46	371.238	NA	NA	5606	4202	4642	9218	4600	4502	2622	7512	3752	7482	3196	8036	3840	11794	6386	5654	3934	5598	2960	5210	3432	3542	4844	5972	2.73122	2409	882.023	1.70769	0.878774
1357	370.26775 Da 919.18 s	15.32	371.275	NA	NA	20470	12716	21832	9034	15834	11174	15868	15332	17444	17860	14752	7642	20612	12906	20944	15582	19578	14098	14908	17556	17688	8422	17608	19580	-3.18821	-4636.33	1454.21	0.758731	1.46653
1324	372.28573 Da 885.39 s	14.76	395.275	NA	NA	0	39482	7586	78494	18116	16794	8706	146942	6468	44710	6036	42896	20160	229974	6442	16508	9952	36560	4880	76406	9086	32022	36916	34892	3.05798	55111	18022	Inf	0.610392
1359	374.24131 Da 921.32 s	15.36	375.249	NA	NA	3234	2538	2494	10998	4034	3216	2188	9312	2126	17498	1944	6450	1862	20868	3078	4120	2720	2420	1578	3178	2416	2406	3740	3284	2.28105	4572.83	2004.71	3.25996	2.23926
1323	374.30124 Da 884.61 s	14.74	397.29	NA	NA	23132	42922	10494	111166	38790	28070	5908	115688	6330	67852	7002	71312	7982	173506	22846	48076	11396	71518	6072	61022	10696	51972	38816	41348	4.0496	57915.7	14301.6	8.31241	0
2112	375.24106 Da 818.02 s	13.63	374.234	NA	NA	72874	63480	20080	0	22834	0	2682	55438	0	59242	21870	70530	38304	84272	0	52484	0	107216	21470	0	0	75366	0	54538	2.82471	35204.3	12463	Inf	0.806589
673	375.33305 Da 1071.56 s	17.86	376.34	NA	NA	5476	5992	0	5476	1782	2528	4700	20910	1518	9178	0	4738	8164	22302	698	604	720	3300	0	13308	672	0	8794	7642	2.84051	5287.83	1861.58	Inf	0.806589
1303	376.17617 Da 863.91 s	14.4	377.183	NA	NA	3846	2558	0	3316	2598	3706	1530	4652	2086	7518	1488	3672	1924	6072	0	2346	2906	3746	1166	3678	2158	2204	3308	4620	3.49978	2089.83	597.132	Inf	0
2114	376.27094 Da 988.68 s	16.48	375.264	NA	NA	42042	213394	2300	229952	8522	138410	1890	271848	4146	149000	2416	74142	94718	220966	14190	67586	992	59244	216	173820	4320	83438	22054	17086	5.49894	125090	22748	101.949	0
2117	378.30304 Da 1063.12 s	17.72	377.296	NA	NA	3116	20244	0	3394	860	4322	0	23286	330	10276	330	10828	12312	12258	1526	7688	0	7212	0	10162	148	8814	1744	1436	4.07637	8296.17	2035.18	Inf	0
362	381.28786 Da 772.51 s	12.88	382.295	NA	NA	0	2416	0	21056	0	3224	562	12430	824	7084	0	5566	1232	22988	972	3114	936	1612	0	2108	0	1508	1340	7630	3.22767	7072.5	2191.21	Inf	0.369028
968	382.16510 Da 746.49 s	12.44	383.172	Neosolaniol	C19H26O8	0	0	0	0	0	2616	3086	8198	0	4060	0	3666	0	3732	0	4030	0	3172	2190	4460	0	2098	0	4190	5.46874	2912.17	532.512	NaN	0
579	382.18508 Da 925.05 s	15.42	383.192	NA	NA	1546	3070	280	3724	1006	746	770	7286	0	3666	0	1776	1990	10294	0	1354	506	2268	0	5956	510	1064	4036	2150	2.9406	2725.83	926.966	Inf	0.806589
866	382.23268 Da 710.16 s	11.84	383.24	NA	NA	0	0	0	0	2380	4108	7488	4832	7922	4626	8622	0	8364	3734	8294	2442	10156	0	8476	9762	9466	0	12468	11612	-2.75798	-3543.33	1284.76	NaN	4.40945
2129	384.14977 Da 717.11 s	11.95	383.142	NA	NA	736	14512	680	7482	1008	0	0	7236	870	9694	970	68996	0	8198	644	16780	3306	84664	0	3472	0	63942	0	2128	2.70854	23240.8	8580.57	Inf	0.878774
1045	385.28105 Da 766.61 s	12.78	386.288	NA	NA	1230	10674	1768	37718	1044	3028	646	11004	2172	10920	3168	22402	2190	28074	3398	3698	6628	8842	3226	26824	2746	18696	1556	5748	4.00367	13154.7	3285.65	8.00868	0
2135	386.16508 Da 697.74 s	11.63	385.158	NA	NA	690	5234	718	0	824	0	0	5816	1704	7056	1534	68690	578	5746	408	13538	1870	38366	0	3144	568	23126	0	668	2.30657	13540.8	5870.54	Inf	2.23926
1438	386.33788 Da 1181.87 s	19.7	409.327	NA	NA	32366	37176	422	47852	5576	10160	14316	111126	5620	53656	332	21464	45300	170918	2432	1718	2674	9792	268	105914	1544	13660	79730	45672	2.55757	36544	14288.6	50.9239	1.46653
1080	387.29624 Da 779.41 s	12.99	388.304	NA	NA	742	9000	1572	32848	622	2468	0	6274	1210	10594	2052	16560	1474	20122	2554	3008	4506	6678	1284	15568	1782	13266	1302	3994	3.86151	10106.7	2617.28	Inf	0
1050	388.24183 Da 769.36 s	12.82	389.249	NA	NA	96030	47720	86822	29488	83240	46470	66416	68664	85806	95016	51768	17234	92708	67912	90912	55794	113206	61078	52852	85134	78806	15518	101306	86746	-3.16825	-26924.8	8498.34	0.701558	1.46653
497	390.15501 Da 857.33 s	14.29	391.162	NA	NA	3620	3356	2204	5410	3754	2300	1360	4192	2074	9574	1194	2836	1860	8384	3998	3806	1968	3672	1070	4020	2122	2320	3702	5460	2.61924	2200.33	840.066	2.30989	0.878774
2146	390.28601 Da 987.28 s	16.45	389.279	FAHFA 24:4	C24H38O4	23330	143236	1162	113844	5212	69368	1180	180212	2438	109962	1354	14848	62478	117532	8922	46536	450	39242	692	90758	2182	52486	15036	10412	4.80309	72000	14990.3	48.0345	0
2147	391.23519 Da 843.93 s	14.07	390.228	NA	NA	6410	15510	2232	0	2118	0	0	16672	2762	7222	3730	9550	6032	21284	8828	11040	30658	30398	0	13784	4142	10320	4084	22202	3.32867	7248.83	2177.7	Inf	0
1056	391.26976 Da 770.70 s	12.84	392.277	NA	NA	0	3754	642	15248	438	2510	0	6406	0	3032	0	9070	922	14208	0	2766	1018	3586	0	6202	514	10716	0	1662	4.6007	6302.17	1369.83	Inf	0
215	392.19039 Da 703.04 s	11.72	393.198	Paramethasone	C22H29FO5	150338	43568	132150	72176	125280	78796	103500	58346	129162	146810	81660	17996	115958	49196	167658	104158	156190	31642	78736	143108	101352	20354	107586	111898	-3.09083	-47626.8	15409.1	0.64102	2.23926
580	392.21309 Da 925.57 s	15.43	393.22	NA	NA	3438	9644	808	12108	2762	3080	2520	33758	1134	12112	666	4232	5838	44096	1410	3174	1354	6460	270	19136	1520	4132	12722	8732	2.78232	10518.5	3780.48	11.5159	0.878774
1286	392.25192 Da 851.93 s	14.2	393.259	NA	NA	9446	10624	6918	16578	8936	7864	4590	12008	6582	20138	4834	11880	4268	18704	8778	7394	9622	10230	4050	11150	5816	10054	10986	10242	3.07661	5170	1680.42	2.01969	0.610392
2151	392.25747 Da 1009.62 s	16.83	391.25	NA	NA	928	11614	0	4034	0	3494	0	17624	0	7446	0	8488	2250	15222	0	2002	0	1440	0	6924	0	7994	330	0	4.40518	6897.83	1565.84	Inf	0
2152	392.28259 Da 857.19 s	14.29	391.275	NA	NA	4184	10626	3148	31428	5308	4022	4304	8556	4762	9228	2676	85358	2804	13776	4330	36958	4198	176318	3040	4782	3346	125182	4120	8194	2.38199	39017.3	16380.1	12.1273	2.23926
2160	394.27275 Da 1061.82 s	17.7	393.265	NA	NA	49424	129308	1926	218390	14812	98412	1024	170200	8346	130788	0	108924	79952	210050	26268	58824	1202	46728	0	125020	3578	85510	42742	25286	5.4359	98180.5	18061.5	Inf	0
1132	395.30145 Da 796.07 s	13.27	396.309	NA	NA	0	9328	440	58224	292	4276	0	9386	222	12986	880	92852	388	35778	1144	5818	1202	6582	578	11852	706	35370	500	5074	2.94448	23431.2	7957.65	Inf	0.806589
542	395.32289 Da 892.17 s	14.87	396.33	NA	NA	0	2356	1768	2458	2920	2026	3316	4028	2854	5374	756	1946	3500	4302	2192	3562	2364	2476	1202	3034	1708	1434	3000	3058	2.36766	872.833	368.649	Inf	2.23926
2162	396.23880 Da 833.76 s	13.9	395.232	NA	NA	20326	27258	18790	0	20786	0	1052	48134	0	21012	13754	91456	15226	34962	26410	46536	26912	70706	16424	0	0	62902	2036	0	2.12713	20104.2	9451.3	Inf	2.89868
411	397.31711 Da 801.59 s	13.36	398.324	NA	NA	544	16104	854	81360	568	5942	0	11564	598	23632	1262	181782	328	47296	2040	8412	1566	14550	866	22628	1192	115338	580	5682	2.74616	43657.7	15897.7	Inf	0.878774
2166	398.20052 Da 778.01 s	12.97	397.193	NA	NA	2678	40232	1676	15140	2694	19694	1430	29778	2342	34762	2264	272362	3262	113736	5156	113544	3948	86936	1484	20134	0	92354	1250	9240	3.1814	68310.7	21471.9	Inf	0.369028
625	398.24989 Da 988.40 s	16.47	399.257	NA	NA	1690	2158	502	2658	950	1050	1596	4324	1016	1996	0	1222	2668	2372	0	706	0	1380	0	0	802	1428	2792	1894	2.1078	764.333	362.621	NaN	2.89868
562	398.26263 Da 912.80 s	15.21	399.27	NA	NA	1944	3114	820	6990	1910	1238	640	9020	692	4024	458	2022	1744	15174	1020	2184	1142	3010	682	5382	576	2236	3092	2180	2.76088	3487.83	1263.3	5.08784	0.878774
593	398.29896 Da 940.91 s	15.68	399.306	NA	NA	10838	9140	7762	9778	10954	10968	4318	12606	6616	23728	4122	9636	4866	14590	11334	8800	10412	7332	3180	9744	5362	6342	9184	11744	2.126	3788.33	1781.91	1.82938	2.89868
2178	402.28587 Da 1008.80 s	16.81	401.279	NA	NA	1058	15536	0	15718	404	4792	0	21190	0	11502	0	6988	2024	16302	284	2314	0	1670	0	8860	0	6412	774	670	4.55477	8950.83	1965.16	Inf	0
47	403.13949 Da 555.83 s	9.26	404.147	NA	NA	0	0	0	0	0	278	1770	0	1140	748	3150	362	1684	838	5552	1728	4196	0	1596	1662	3114	0	4222	2704	-2.82006	-1508.67	534.978	NaN	2.89868
62	404.21872 Da 571.54 s	9.53	405.226	NA	NA	210	2250	206	3742	0	0	0	2144	0	5996	0	7574	0	2972	0	6140	404	2004	0	1368	0	15092	0	906	3.2366	4114	1271.09	NaN	0.369028
2183	404.26462 Da 801.70 s	13.36	403.257	NA	NA	460	526	554	0	3992	5164	10436	5204	0	4690	17790	1248	19696	2652	27716	3438	18302	640	66038	19060	27824	1224	43476	44708	-2.72481	-12310.8	4518.05	Inf	4.40945
1090	404.27539 Da 782.63 s	13.04	427.265	NA	NA	1038	906	1180	918	38948	27426	51806	21186	89166	43798	79056	1206	144582	17288	253228	12410	194110	1148	274216	198536	350356	0	457782	313732	-3.4406	-108076	31412	0.404517	0.878774
2184	404.30119 Da 1063.29 s	17.72	403.294	NA	NA	80328	354682	1556	322250	17458	229440	1514	287704	10064	172362	3444	180618	194618	410768	30068	131010	1496	107652	2170	296846	4384	163794	48656	31088	6.74203	191038	28335.4	61.4569	0
1382	404.31184 Da 971.36 s	16.19	427.301	NA	NA	25834	52946	1782	86506	6864	7706	7296	344566	2532	55634	768	59806	57910	474356	3128	4934	3272	12852	0	220594	2466	36938	87382	27548	2.32279	98762.7	42518.9	Inf	2.23926
2190	408.25136 Da 882.93 s	14.72	407.244	NA	NA	2398	0	2116	13626	0	4362	1364	6034	1078	8426	0	6338	3518	10022	2414	2694	1958	3902	1518	4358	0	4940	2674	3894	3.6567	4129.83	1129.39	Inf	0
2191	408.25224 Da 898.65 s	14.98	407.245	NA	NA	1376	12762	0	11760	2110	0	0	24390	0	6268	1280	7710	3952	18028	768	4748	0	5424	0	4612	1192	7570	366	1904	3.83113	7844.33	2047.53	Inf	0
2192	408.27513 Da 825.28 s	13.75	407.268	NA	NA	1090	8414	594	0	398	1446	404	1946	880	9280	576	7388	1208	3120	1260	39858	1746	40332	682	1404	310	21992	632	1322	2.49476	10560.2	4232.94	14.3291	1.46653
2193	410.26619 Da 885.75 s	14.76	409.259	NA	NA	0	0	0	26446	0	8750	2250	24654	0	12402	0	0	0	14298	7152	0	2858	0	0	8952	3748	7258	5964	4934	2.33931	7143.5	3053.68	NaN	2.23926
2194	410.26720 Da 896.63 s	14.94	409.26	NA	NA	3190	17844	3540	27106	8498	6508	900	32520	1872	12620	1940	22798	6798	32326	0	16260	2430	17992	1672	5852	3062	23940	5434	5876	4.99581	15192.2	3040.98	Inf	0
2195	411.21657 Da 818.02 s	13.63	410.209	NA	NA	47884	27876	11740	0	17318	0	0	29316	0	37478	21342	32996	21326	61668	0	21784	0	29216	14058	0	554	36834	0	31302	2.10514	14520.7	6897.71	Inf	2.89868
372	411.29666 Da 777.63 s	12.96	412.304	NA	NA	0	7806	856	35908	486	2276	318	7820	796	6360	1060	10694	838	18012	962	3510	1970	8820	718	6624	836	11902	648	2126	3.44243	9364.17	2720.22	Inf	0
1250	412.27879 Da 841.98 s	14.03	413.286	NA	NA	5060	5886	5278	10344	8788	8372	3090	10240	5628	10044	4400	16054	4918	11920	8800	7800	8800	5782	5188	11630	6256	8006	9200	13854	2.9043	3710.5	1277.59	1.81812	0.806589
1117	413.31211 Da 789.31 s	13.16	414.319	NA	NA	842	15044	1150	58224	666	4808	540	11366	1052	17888	1786	58468	956	37836	2682	6304	3394	10432	1248	17866	1510	37214	1050	6234	3.84437	22067.3	5740.17	19.7003	0
2204	414.19536 Da 758.84 s	12.65	413.188	Naltrindole	C26H26N2O3	818	16296	690	0	868	3670	0	10112	1712	21256	1088	85114	824	22934	1288	46722	1584	78852	1524	7472	798	38118	0	4024	3.22871	26948	8346.36	Inf	0.369028
547	414.27274 Da 893.43 s	14.89	415.28	NA	NA	0	1918	0	10430	0	0	0	1138	0	3122	0	15242	0	4142	0	9906	0	47154	0	0	0	18166	0	1080	2.37755	9358.17	3936.05	NaN	2.23926
569	414.29392 Da 918.85 s	15.31	415.301	NA	NA	10748	6676	10874	5616	9528	6360	8398	8272	9106	9480	7660	3904	9120	7134	9696	8762	11272	6922	7602	9382	9668	4824	9266	9666	-2.8486	-2161.67	758.853	0.78476	2.89868
2208	416.26466 Da 863.93 s	14.4	415.257	NA	NA	2100	3584	1722	5254	1490	1846	1458	2588	1790	3076	1468	2858	2238	3272	1400	1814	1508	2716	0	2366	0	3554	2338	2872	3.98927	1524	382.024	Inf	0
2212	418.20648 Da 706.66 s	11.78	417.199	NA	NA	3186	2676	0	1630	3048	3296	2976	3652	2472	2938	0	3786	1210	3090	2952	2774	2822	2750	0	3760	0	3432	3524	3016	2.23652	1217.5	544.372	Inf	2.89868
1193	418.23132 Da 815.73 s	13.6	419.239	NA	NA	42462	38006	46534	44704	31274	25112	25300	30376	30698	43958	24046	46416	35238	41326	50436	44412	43452	57448	26182	34984	33944	36890	35170	45300	2.02118	5349.67	2646.8	1.19233	4.40945
2213	418.24335 Da 750.83 s	12.51	417.236	NA	NA	1102	1370	1032	1348	13220	36496	30854	19734	50032	21822	80060	3504	37062	16614	44034	10092	47682	2034	68760	42118	73416	3050	94266	70138	-3.12728	-26100	8345.91	0.712319	2.23926
578	418.26796 Da 922.03 s	15.37	419.275	NA	NA	8676	6618	6860	35182	13936	11378	3610	23490	5068	47196	4474	18646	3984	53438	7854	8116	5550	5306	2820	5514	4124	4964	10718	7714	2.30652	12490.7	5415.38	3.83135	2.23926
2214	418.27987 Da 887.43 s	14.79	417.273	NA	NA	1738	6922	1840	14614	2520	4704	0	6074	0	8454	1574	4476	3300	14984	1744	3742	0	3508	1244	6532	0	4802	2566	2224	4.48438	5375.83	1198.79	Inf	0
2215	418.31644 Da 1062.60 s	17.71	417.309	NA	NA	32148	164062	862	118820	7722	60034	746	218024	4220	121038	1784	90136	95366	104336	11868	58514	256	48132	360	88004	2096	75602	19368	10166	4.65111	81672.7	17559.8	83.1062	0
619	420.24456 Da 988.25 s	16.47	421.252	NA	NA	42554	27738	6082	35916	28260	20330	24354	56356	21236	49884	3730	25910	39514	55164	12376	15322	14586	27796	1954	88156	12664	20540	47302	44488	2.30964	17749	7684.74	5.92532	2.23926
2222	420.29590 Da 896.27 s	14.94	419.289	NA	NA	4154	22078	3152	0	7230	7678	3244	30746	2456	13650	1586	19882	7340	31342	7570	15536	3160	19596	1786	12216	0	22658	7012	7674	4.36439	12863.8	2947.45	Inf	0
2224	421.24505 Da 818.37 s	13.64	420.238	NA	NA	30930	21084	6840	0	9456	0	1860	19166	0	26344	9020	22864	12614	33040	0	16048	0	34604	7822	0	410	24362	0	23902	2.5377	11871.8	4678.19	Inf	1.46653
1136	421.31709 Da 799.46 s	13.32	422.324	NA	NA	0	2262	0	15406	0	1218	0	2168	0	3068	0	24842	0	7714	0	2076	0	3530	0	1572	0	20616	0	876	2.85919	7112.33	2487.53	Inf	0.806589
2226	422.14995 Da 842.99 s	14.05	421.143	NA	NA	0	171232	101734	3214	138844	0	1430	205042	147430	209020	110240	232456	92142	320906	0	120902	1850	122562	93126	3212	1920	152150	0	6924	1.99515	71575.3	35874.7	Inf	4.40945
2227	422.22164 Da 852.72 s	14.21	421.214	NA	NA	22710	20974	18824	0	17228	23112	24088	27646	0	19592	15564	79072	22648	68258	31342	44712	25606	149260	16550	22098	0	22006	19172	19616	2.11094	23551.2	11156.7	Inf	2.89868
2228	422.27403 Da 768.41 s	12.81	421.267	NA	NA	506	748	914	0	1110	1534	0	1080	2474	1382	4892	0	2934	696	3950	684	3290	984	7670	3926	7202	0	8388	5256	-2.96645	-2253.33	759.607	Inf	2.89868
2229	422.30323 Da 1160.78 s	19.35	421.296	NA	NA	2600	21238	0	20424	436	4676	0	25710	364	13880	0	6264	6990	19536	646	3790	0	3192	0	10938	0	0	1222	756	3.89272	9845.5	2529.21	NaN	0
140	424.26684 Da 631.53 s	10.53	425.274	NA	NA	2266	0	0	5024	1496	806	1032	2188	858	3342	842	27386	0	10286	0	2250	330	32554	0	0	0	18474	0	0	2.3339	7957.17	3409.38	NaN	2.23926
659	426.14855 Da 1053.48 s	17.56	427.156	NA	NA	5860	2736	6342	3464	6426	3326	3278	2210	5354	4144	5602	4150	3404	5058	6730	5300	7972	4678	5416	3894	4978	2412	3960	4886	-3.03032	-1588.67	524.256	0.751438	2.23926
1158	426.25737 Da 805.78 s	13.43	427.265	NA	NA	876	0	0	0	29712	22716	38462	19040	73784	37668	80464	2610	103456	20940	147554	23804	115750	1028	210808	132714	216954	1962	321814	232588	-3.84416	-70380.3	18308.4	NaN	0.610392
1423	426.28319 Da 1071.00 s	17.85	427.29	NA	NA	1760	2102	0	2478	1190	1176	1312	3538	966	1994	0	822	3068	9248	428	626	0	1224	0	2220	700	1430	2064	2096	2.5719	1455.5	565.924	Inf	1.46653
2237	428.17465 Da 686.31 s	11.44	213.08	NA	NA	1040	2542	778	0	660	1096	712	4976	1096	3148	792	21218	0	2604	648	3334	1804	16272	0	1428	0	5746	0	1422	2.47722	4688	1892.44	Inf	1.46653
117	429.23427 Da 612.13 s	10.2	430.242	NA	NA	2038	892	2132	1424	1532	986	2748	1156	2086	1588	1284	414	1746	1354	2426	906	1220	0	2000	2052	2278	1628	1686	670	-4.06643	-842.167	207.102	0.545047	0
1395	430.20138 Da 989.54 s	16.49	431.209	NA	NA	4142	3316	642	3138	1684	2538	4034	6116	1760	5104	260	1944	4488	3142	1308	1490	1112	3772	0	4682	1538	2394	4628	4318	2.32742	1363.17	585.7	Inf	2.23926
2241	430.29438 Da 860.76 s	14.35	429.287	NA	NA	0	3578	0	5086	0	0	0	5856	0	2008	0	62628	0	11912	0	13698	0	28812	0	1864	0	70824	382	2092	2.43187	17331.3	7126.74	NaN	2.23926
1280	431.30001 Da 852.31 s	14.21	432.307	NA	NA	0	1240	0	7326	0	750	0	2216	0	2700	0	13386	0	4104	216	4684	0	6700	0	1414	0	4274	0	0	3.54227	4048.17	1142.82	NaN	0
410	432.16489 Da 803.41 s	13.39	431.158	Benzyl alcohol _ Hex-Hex	C19H28O11	45354	33472	23184	40354	15024	49956	57554	39890	39586	37508	11974	55520	12960	61880	55544	43922	65362	53924	15646	38240	13516	53488	15328	51596	2.14206	15726.5	7341.76	2.35325	2.89868
2244	432.17833 Da 842.84 s	14.05	431.171	NA	NA	152158	182802	94468	0	128554	0	0	225754	0	161858	58182	188254	68582	312008	0	129232	0	145840	61710	0	0	100578	0	0	2.06591	73556	35604.6	NaN	2.89868
2247	432.31036 Da 865.25 s	14.42	431.303	NA	NA	0	15514	0	4054	0	2106	0	17718	0	4888	268	114042	384	17684	690	28156	3758	128980	394	3118	554	119018	538	4832	2.62052	37793.7	14422.2	Inf	0.878774
2248	432.33173 Da 1159.90 s	19.33	431.324	NA	NA	2158	22834	0	25328	456	5520	0	34210	224	17510	0	3818	5550	19162	870	3224	0	2690	0	17110	0	4016	1302	870	3.76549	12144.3	3225.17	Inf	0
1412	432.34326 Da 1048.39 s	17.47	455.332	NA	NA	30692	53904	568	69060	5134	4922	10922	126382	3146	59528	428	33504	62340	239944	2492	1738	2820	9382	326	126378	1836	22830	81208	30398	2.57116	48004.8	18670.5	53.4515	1.46653
2251	434.31174 Da 897.08 s	14.95	433.304	NA	NA	1434	8226	1102	9400	2868	2516	0	11212	956	5874	576	0	3070	10476	0	6082	1148	6558	654	3804	1142	8338	2126	2378	4.38869	4982.33	1135.27	Inf	0
921	436.22124 Da 730.00 s	12.17	437.229	NA	NA	0	0	0	0	1674	1602	3342	3142	3676	3000	4684	0	2800	0	5070	1518	4158	0	5914	4762	6742	0	7082	4252	-3.14186	-2238.83	712.581	NaN	2.23926
647	436.23106 Da 1013.26 s	16.89	437.238	NA	NA	1108	1834	448	2112	604	508	626	3780	402	2700	0	1966	1606	6214	586	488	482	700	0	4440	0	1410	1854	2022	3.10476	1704.83	549.103	Inf	0.610392
2256	436.25338 Da 702.92 s	11.72	435.246	NA	NA	410	0	0	1036	22322	57036	53518	35594	70808	29794	122950	3392	36416	12558	52246	8286	55800	0	81914	52422	99360	1574	114500	90572	-2.84514	-34831.7	12242.5	Inf	2.89868
812	436.26530 Da 687.97 s	11.47	459.254	NA	NA	0	0	0	0	29400	40892	43870	38562	76512	29388	153866	4104	30932	16218	63718	8778	78010	0	85482	63896	98674	2212	109122	98348	-2.76975	-38932.3	14056.2	NaN	4.40945
690	436.35106 Da 1331.67 s	22.19	437.358	NA	NA	2188	2764	350	3056	388	596	1030	12470	566	3110	218	2078	2920	23862	414	0	530	802	0	11570	316	1294	5952	3120	2.01783	4154.17	2058.73	Inf	4.40945
981	438.22057 Da 747.79 s	12.46	439.228	NA	NA	1206	0	1196	0	0	1448	2148	2368	3044	2414	3928	0	2454	0	3578	1546	2776	0	3580	3186	3854	0	4988	4208	-2.7473	-1465.17	533.312	Inf	4.40945
1131	439.32761 Da 796.17 s	13.27	440.335	NA	NA	0	2444	0	12280	0	824	0	1880	0	3324	0	14278	0	8254	302	1412	0	2436	0	1964	0	12016	0	788	3.34512	5133.17	1534.53	Inf	0
2266	440.24009 Da 800.12 s	13.34	439.233	NA	NA	694	0	0	0	8776	0	4144	7610	21654	11762	30246	632	30000	5520	52468	5128	36320	0	111304	54598	89408	2228	120768	84404	-3.52764	-27825	7887.71	NaN	0.806589
1212	440.27282 Da 825.13 s	13.75	441.28	NA	NA	754	0	0	0	792	722	914	0	1248	0	1296	0	2082	0	2394	0	1866	0	2110	2422	2604	0	3998	3272	-3.29932	-1136.83	344.566	NaN	1.46653
2267	440.27666 Da 971.67 s	16.19	439.269	NA	NA	1012	9516	0	11132	332	2544	194	12030	180	4802	0	3014	2524	6150	810	2066	0	1760	0	3306	0	4310	728	460	3.89553	4609.17	1183.19	Inf	0
1166	441.34332 Da 807.10 s	13.45	424.34	NA	NA	0	0	0	27516	0	620	0	2254	0	2374	214	59670	0	11580	0	1704	0	7860	286	1822	0	67992	0	326	2.18335	15268.2	6993.01	NaN	2.89868
1424	442.25834 Da 1072.36 s	17.87	443.266	NA	NA	6990	8118	618	7524	4078	4830	5216	10792	3780	8388	438	2266	9694	9592	2238	1786	2212	6158	0	9838	2432	3662	9000	7798	2.73514	2838	1037.61	Inf	0.878774
592	442.32516 Da 940.54 s	15.68	443.332	NA	NA	13560	12176	10432	12694	14830	14138	4656	17048	7364	29474	6598	12916	5576	21596	14388	11332	10560	8414	4606	12242	8342	9334	13068	15030	2.19535	5201.17	2369.18	1.92283	2.89868
2276	443.67052 Da 901.19 s	15.02	442.663	NA	NA	2680	2516	3992	0	4118	2044	1724	1914	2844	2578	4330	0	3886	2686	3294	2350	3658	2002	3472	2274	2506	0	2000	2740	-2.77648	-1450	522.244	0.619059	2.89868
1005	444.26746 Da 752.36 s	12.54	445.275	NA	NA	302	0	0	0	1654	1156	2714	1640	4826	1798	5730	0	4074	896	6834	596	6172	0	7482	6044	8716	0	12384	8724	-3.76216	-3336.17	886.768	NaN	0.610392
2281	446.18003 Da 803.30 s	13.39	445.173	NA	NA	71974	50990	39542	40406	21824	66140	76864	61008	55458	49426	22538	95756	17846	93658	87166	70366	99340	87526	27030	53582	14774	91018	20880	77364	2.04037	23500.3	11517.7	2.4566	4.40945
646	446.26007 Da 1012.81 s	16.88	447.267	NA	NA	1224	2734	0	3066	240	860	856	6858	286	3890	0	1502	2302	13110	0	414	0	998	370	7976	304	1138	3024	3134	2.96354	3089.5	1042.5	Inf	0.610392
2285	446.28878 Da 814.17 s	13.57	445.281	NA	NA	532	4244	0	11760	0	1090	0	6696	0	3262	0	19504	0	3910	1146	5612	2422	16032	710	0	0	10480	770	2214	3.65423	6602	1806.67	Inf	0
2286	446.34745 Da 1157.53 s	19.29	445.34	NA	NA	340	9180	0	0	474	0	342	11524	220	5610	0	1786	3162	6854	512	2284	418	1884	0	5286	0	1928	732	604	3.01318	3395	1126.71	NaN	0.610392
2287	448.12755 Da 796.06 s	13.27	447.12	NA	NA	311688	457890	253660	219368	342490	197732	152978	364018	146436	230684	169192	589984	221184	388088	326538	237492	269548	287494	162668	186176	183732	524972	190356	247116	2.06679	100045	48406.1	1.60013	2.89868
664	448.27587 Da 1069.91 s	17.83	449.283	NA	NA	21278	30616	1548	22236	15574	10588	12412	13846	12412	23548	1062	7886	26712	26698	7718	6512	8286	12524	682	24932	5862	15894	23682	19190	2.34748	6436.83	2742.02	5.86291	2.23926
2291	449.30029 Da 820.39 s	13.67	448.293	NA	NA	958	30384	1034	170702	1508	8906	1082	41736	2520	46886	2022	352206	2716	54448	2416	82778	3892	130538	1810	15300	472	227246	462	5950	3.11838	95515.7	30629.9	85.3926	0.610392
1284	449.31229 Da 853.56 s	14.23	472.301	Glycochenodeoxycholate	C26H43NO5	504	3558	314	26202	412	1460	296	4732	598	6630	438	33458	0	11514	496	10498	1026	17876	0	3858	378	15278	0	1262	3.66554	10988.7	2997.83	Inf	0
2294	450.12535 Da 677.72 s	11.3	224.055	NA	NA	85680	206328	44874	0	17560	1782	926	302464	0	338450	70646	1789034	25364	128868	115128	589530	31306	282106	47698	0	712	600058	0	24050	2.26091	318565	140901	Inf	2.23926
2296	450.24785 Da 847.01 s	14.12	449.241	NA	NA	708	14182	790	868	814	3888	580	10064	3510	39670	744	67990	608	27508	1210	28544	1300	30714	0	7430	0	16954	882	2084	3.55242	19895.8	5600.65	Inf	0
2297	450.26853 Da 795.13 s	13.25	449.261	NA	NA	0	0	0	0	7160	8774	14082	5922	15054	8050	22212	1140	24622	3916	39192	3982	31744	0	88908	36316	74184	0	80666	79320	-2.99472	-20867	6967.94	NaN	2.23926
2298	450.30544 Da 971.68 s	16.19	449.298	NA	NA	1150	15428	334	15712	738	3590	404	17712	378	7484	156	3844	3006	7950	940	3088	144	2344	246	6354	512	3876	814	896	3.80742	6621.33	1739.06	17.526	0
729	452.37053 Da 591.13 s	9.85	491.333	NA	NA	644416	394992	450334	514190	467756	413942	442746	235604	588620	765068	523018	158986	505936	444070	551566	258558	464316	24486	577842	525262	561978	288482	532690	456062	-2.90759	-152626	52492.4	0.704441	2.89868
996	454.25211 Da 748.78 s	12.48	455.259	NA	NA	0	0	0	0	3606	5702	7540	3474	12356	5706	21602	0	10476	3774	16036	2118	16676	628	15976	16836	20008	0	23222	21582	-2.90382	-7306.5	2516.17	NaN	2.89868
552	454.30369 Da 900.62 s	15.01	455.311	NA	NA	382	2838	0	10286	0	852	0	4404	244	1752	0	15578	0	5696	542	7624	1338	20564	238	1084	412	13788	0	1628	3.65671	6911.5	1890.08	Inf	0
2306	454.31505 Da 820.83 s	13.68	453.308	NA	NA	2498	16672	1038	0	1528	2268	644	10188	2882	16234	1892	43064	0	9718	2848	9550	4866	30314	2614	4970	914	37288	1404	3764	3.28176	13408.5	4085.77	Inf	0.369028
1125	462.23363 Da 794.66 s	13.24	463.241	NA	NA	0	0	0	0	1996	968	1980	2772	3720	2010	4142	0	2168	766	4382	1048	2656	0	7674	3422	9542	0	14642	5340	-2.9157	-3048	1045.37	NaN	2.89868
577	462.29393 Da 921.49 s	15.36	463.301	NA	NA	8028	6106	6096	31924	13250	7830	2174	17670	3446	32540	3388	15732	3112	32218	5644	7366	3776	5470	2070	4804	3368	3780	13482	5564	2.18399	8597.5	3936.61	3.81374	2.89868
2315	464.15688 Da 797.25 s	13.29	463.15	NA	NA	9644	11020	6720	9562	9872	8820	3228	12094	4372	9398	4512	6604	6134	14828	8802	10918	9946	7848	2622	6044	4044	10722	6198	10910	3.34689	3556.17	1062.53	1.83186	0
2317	464.28380 Da 795.29 s	13.25	463.277	NA	NA	0	0	0	430	4696	5744	7892	4258	9416	4636	15808	764	17150	2334	24172	2534	18934	0	55702	21832	34696	0	45360	47796	-3.05646	-11958.2	3912.43	NaN	2.23926
2318	465.29322 Da 801.29 s	13.35	464.286	NA	NA	0	6022	922	18600	0	3706	704	14170	1420	7438	5198	21176	5490	13006	738	23212	4042	37394	0	4892	0	55864	0	954	3.40371	15660	4600.86	Inf	0
2319	467.13354 Da 853.39 s	14.22	466.126	NA	NA	2236	3458	1594	7272	2632	4236	2394	5100	1210	3084	1524	3118	1474	6222	2486	1850	1298	2640	1348	2302	688	3066	3106	3934	3.58719	2024.33	564.322	2.40608	0
1325	467.29918 Da 887.17 s	14.79	468.306	LPC 14:0	C22H46NO7P	0	0	234	39776	206	0	0	8978	310	2486	388	136412	446	43102	0	2914	0	27236	316	1446	486	125452	0	1026	2.28809	32203.5	14074.4	NaN	2.23926
2321	468.30716 Da 1037.47 s	17.29	467.3	NA	NA	918	9794	0	9842	292	0	0	10540	0	3764	0	1886	2446	5606	878	2560	0	1528	0	4028	200	4808	510	636	3.64485	4145.67	1137.4	Inf	0
31	470.18955 Da 522.25 s	8.7	471.197	NA	NA	0	0	0	4294	0	0	0	1216	0	0	0	17062	0	0	0	0	0	28078	0	0	0	16102	0	0	1.98451	5562.67	2803.04	NaN	4.40945
1374	472.33554 Da 947.15 s	15.79	473.343	NA	NA	2662	1708	1698	2892	3714	4274	0	3360	1864	4470	1106	2282	1422	2254	2024	1762	1872	2614	1338	2062	1364	1690	1538	2058	2.25372	902	400.228	Inf	2.89868
2330	474.27560 Da 894.78 s	14.91	473.268	NA	NA	0	45804	2776	0	3302	750	680	94880	184	0	2062	425740	3710	87012	0	24318	2790	36592	0	372	170	277334	0	0	2.10718	81427.3	38642.8	NaN	2.89868
2337	477.27156 Da 924.81 s	15.41	476.264	NA	NA	200	3840	0	0	322	442	0	5672	0	2022	0	24972	392	5262	490	3182	174	4964	0	996	246	17300	190	224	2.44287	5571.83	2280.86	NaN	1.46653
2339	478.15552 Da 688.76 s	11.48	238.07	NA	NA	24178	147530	12452	266	9290	462	14716	132234	38788	121726	12780	434702	9798	92334	40050	285420	27240	250056	12130	69752	0	485528	5896	20164	3.25318	152738	46950.4	Inf	0.369028
2341	478.31397 Da 866.78 s	14.45	477.307	NA	NA	408	0	408	12624	480	1006	210	3268	406	1236	222	20718	496	3358	616	4252	936	18902	316	1328	418	19524	536	1176	2.82015	6828.33	2421.27	19.3283	0.806589
2342	478.33589 Da 1038.43 s	17.31	477.329	NA	NA	0	13632	0	12744	358	2808	0	15624	0	5660	0	2958	2822	7056	716	2274	0	2106	0	7056	0	2236	812	490	3.63432	5828	1603.6	Inf	0
2343	479.28651 Da 953.64 s	15.89	478.279	NA	NA	0	7120	246	16532	296	780	290	15422	0	4298	296	39810	826	10260	476	3200	0	2992	232	0	0	30320	228	148	2.84811	10666	3744.94	Inf	0.806589
2351	482.34503 Da 831.80 s	13.86	481.338	NA	NA	558	5562	714	0	504	1300	528	5106	698	3194	1164	32326	356	6044	1174	5376	1080	17756	1050	2388	338	18262	968	3108	2.71625	7607.5	2800.73	12.6731	0.878774
543	483.37532 Da 892.18 s	14.87	484.383	NA	NA	4224	3822	2370	3174	4522	2850	3842	5152	3794	7422	1474	2380	3860	5886	2930	5042	3626	4558	1430	4636	0	0	4872	5052	2.16129	1085.83	502.4	NaN	2.89868
1098	484.21537 Da 782.57 s	13.04	485.223	NA	NA	0	0	0	0	936	754	1684	618	4850	1338	1468	0	3524	422	5868	644	3690	0	3508	3866	6278	0	8246	5576	-3.19064	-2236.17	700.853	NaN	1.46653
30	484.34842 Da 521.59 s	8.69	243.181	NA	NA	8190	6912	5538	15438	7784	5088	4994	11614	5986	7988	5304	13104	6268	8148	7260	7496	5694	6250	7920	8428	6210	7646	6398	7402	2.00772	2330.67	1160.85	1.44152	4.40945
590	486.35131 Da 939.19 s	15.65	487.359	NA	NA	5200	6344	4946	6926	7520	6394	2206	8640	3250	13956	2824	4892	2532	10666	7154	5694	4812	5060	2328	5178	4214	4096	6382	7148	2.25098	2635.5	1170.82	1.98248	2.89868
1278	493.27593 Da 853.82 s	14.23	494.283	NA	NA	0	1060	0	6364	0	398	282	1442	0	1832	0	5210	0	2390	0	2892	544	5066	0	1214	0	3262	0	532	4.09496	2569.67	627.52	Inf	0
1341	493.31481 Da 900.71 s	15.01	494.322	PC 16:1e	C24H48NO7P	3098	5924	0	55736	0	1114	0	14536	0	4870	0	149786	0	30964	1028	5670	0	29884	0	1384	624	133722	0	1426	2.3696	35855.5	15131.5	Inf	2.23926
2363	494.15019 Da 667.02 s	11.12	246.068	NA	NA	4094	15234	1504	0	926	0	0	13586	8738	24110	1994	62874	1092	6212	5954	50714	4922	58000	2956	286	270	62294	1396	4658	2.96261	22010.2	7429.32	Inf	0.610392
1368	495.33010 Da 937.48 s	15.62	496.337	LPC 16:0	C24H50NO7P	1298	14672	0	84578	432	1470	710	106724	412	6644	674	185812	1602	260082	0	1160	334	10314	0	15076	434	195428	1442	0	2.7199	72885.2	26797	Inf	0.878774
903	498.19535 Da 727.47 s	12.12	499.203	NA	NA	1240	0	1416	716	2760	3526	3438	2150	6102	3710	6750	298	5416	2608	7662	1594	8272	0	5748	6300	8100	0	9358	9834	-2.8357	-2960.5	1044.01	0.491431	2.89868
2371	498.26687 Da 784.91 s	13.08	497.26	NA	NA	1050	1432	0	5518	0	962	884	2178	716	1252	784	12148	742	2348	780	2138	1202	4480	776	1348	764	12272	1142	1450	2.56898	3223.83	1254.91	Inf	1.46653
2373	498.33966 Da 830.68 s	13.84	497.332	NA	NA	0	1114	438	1380	1002	2486	1350	5044	1356	1672	798	7958	1434	2870	2706	3076	2556	2876	2006	2942	2910	3902	3538	4422	2.58692	1637.33	632.928	Inf	1.46653
2374	499.28062 Da 818.44 s	13.64	498.273	NA	NA	0	2352	0	11588	466	1418	308	3736	0	3794	0	43460	0	10064	0	3894	340	12300	0	568	0	73002	0	792	2.14739	13821.2	6436.25	Inf	2.89868
2378	500.28294 Da 785.80 s	13.1	499.276	NA	NA	734	1786	726	5310	736	1522	894	3170	728	2566	768	20834	1108	2194	820	4178	1404	3904	1066	2286	1042	8650	1024	1398	2.36198	3895.67	1649.32	5.64003	2.23926
2379	501.26988 Da 920.53 s	15.34	500.263	NA	NA	290	6512	546	11162	558	664	290	8404	0	2936	0	46298	1034	9738	946	2662	0	4918	414	2514	442	31934	452	654	2.4786	10285.3	4149.65	Inf	1.46653
2381	501.62728 Da 895.73 s	14.93	500.62	NA	NA	4952	2414	3142	0	5682	2454	2256	2362	3196	3470	6192	922	4194	2646	5072	3050	4610	1694	4224	2266	2838	0	2976	2566	-4.05027	-2124.17	524.451	0.516615	0.369028
2384	503.25733 Da 900.80 s	15.01	502.25	NA	NA	276	4218	3758	0	270	780	184	4700	0	1768	2980	44666	3332	12540	328	4180	0	15880	3106	500	0	49946	198	0	2.03673	10395.5	5104.02	Inf	4.40945
576	506.32004 Da 921.30 s	15.35	507.327	NA	NA	6384	4034	3780	20938	7778	4800	1638	10550	2220	18240	1754	8120	1762	16860	3696	5850	2682	3546	1588	3406	2838	2746	10030	3574	1.98974	4709.5	2366.89	3.50141	4.40945
2390	507.25653 Da 821.33 s	13.69	506.249	NA	NA	0	2758	326	9864	0	1088	0	3864	726	4368	378	15110	580	5472	0	7080	760	7712	0	1554	0	8766	0	568	4.29922	5452.83	1268.33	Inf	0
2396	511.24536 Da 743.55 s	12.39	254.615	NA	NA	7030	78794	0	0	2842	532	536	67102	6704	35860	0	307208	0	44020	11880	119548	18208	189252	1944	17294	0	419272	0	34710	2.76084	105371	38166.2	NaN	0.878774
2401	512.46506 Da 949.29 s	15.82	511.458	NA	NA	614	21936	1738	0	1486	0	0	24644	0	0	1574	40742	4282	0	0	5090	0	7140	2486	0	0	18408	0	308	2.17735	8840.67	4060.29	NaN	2.89868
2403	513.26051 Da 765.04 s	12.75	255.623	NA	NA	16324	161992	1228	0	13788	1978	0	128568	562	55038	2418	360660	2646	64952	5592	85082	15958	159166	1874	0	0	830598	0	28490	2.2137	151344	68367.2	Inf	2.89868
868	516.20580 Da 711.20 s	11.85	517.213	NA	NA	0	0	0	0	3150	3716	4834	6244	10390	4770	9356	1048	5554	4826	9040	3150	9548	502	7918	7996	10808	450	14692	10994	-2.68902	-3466.17	1289.01	NaN	4.40945
667	516.26319 Da 1070.74 s	17.85	517.27	NA	NA	2376	3910	232	1842	1650	1226	1654	1892	1456	2750	0	820	3070	2994	866	1020	944	1788	0	2888	878	1674	2636	2080	2.16128	760.167	351.721	Inf	2.89868
1351	516.38787 Da 917.52 s	15.29	517.395	NA	NA	2594	1538	2014	1748	1656	1362	1428	1212	2416	2440	2416	1000	2348	1576	2550	1214	2036	510	3354	2676	2166	1104	2202	1812	-3.40631	-749	219.886	0.673674	0.878774
2409	520.01954 Da 627.56 s	10.46	259.002	NA	NA	1114	1436	0	0	5546	25516	0	20190	344	278	1790	18614	664	806	5232	28828	0	8554	902	0	274	0	1260	1816	2.55098	7409.33	2904.5	NaN	1.46653
2416	529.25575 Da 747.84 s	12.46	263.621	NA	NA	5168	47930	1282	4942	4610	0	456	53442	0	21282	4118	143760	2644	17228	8496	68130	10626	60688	3754	0	1428	368786	680	0	2.04982	61910.5	30202.9	Inf	4.40945
589	530.37735 Da 938.82 s	15.65	531.385	NA	NA	4530	3864	3726	5452	5478	4216	1538	5326	2986	9514	2734	4980	1732	7876	4386	3600	3148	3714	1396	4276	2892	3130	4552	4224	2.10916	1756.17	832.637	1.93147	2.89868
2419	531.29291 Da 942.97 s	15.72	530.286	NA	NA	328	15988	230	0	224	1268	160	15868	180	8244	296	85922	564	37192	532	4172	0	7476	244	3858	180	98632	220	272	2.32909	22977.8	9865.58	Inf	2.23926
502	532.19699 Da 861.12 s	14.35	533.204	NA	NA	1466	0	730	4470	1068	1574	708	3844	838	4310	618	13894	812	15788	1302	4874	1264	27210	528	2106	748	4768	1112	6754	2.82902	6533.17	2309.34	8.48352	0.806589
541	539.29669 Da 891.94 s	14.87	540.304	NA	NA	460	1118	204	10174	426	444	0	0	146	1492	0	35110	0	8214	210	2694	0	8762	0	476	0	19818	0	408	2.31802	7272	3137.15	NaN	2.23926
1214	540.38528 Da 827.44 s	13.79	563.375	NA	NA	26544	13768	20764	15104	22750	13680	18796	17398	22890	22048	15204	11104	22472	22594	26822	20392	24524	18728	14188	21196	23504	8014	25028	21626	-2.68433	-4819.5	1795.42	0.80791	4.40945
2428	541.32068 Da 939.24 s	15.65	540.313	NA	NA	432	0	252	99854	0	1384	176	15206	226	10794	0	0	624	35130	414	0	0	10002	260	5098	0	108270	0	426	2.09693	23648.3	11277.6	NaN	2.89868
82	548.28514 Da 591.28 s	9.85	549.292	NA	NA	13448	7018	11028	12806	9870	8086	6730	3948	12600	14652	15028	3858	10658	9906	11190	4438	10404	0	12582	11278	13280	0	10802	8570	-2.86523	-4421.67	1543.21	0.627027	2.89868
2435	553.32099 Da 910.98 s	15.18	552.314	NA	NA	482	3324	278	0	546	490	0	3932	0	1790	336	36592	292	6114	572	3198	466	10404	0	556	0	30324	264	430	2.16177	7826.5	3620.41	Inf	2.89868
2439	555.33647 Da 941.93 s	15.7	554.329	NA	NA	432	7736	0	28164	0	756	0	8070	0	4686	0	36134	368	14314	244	2692	0	3976	0	1896	0	52262	0	0	2.72135	13303.5	4888.56	NaN	0.878774
527	557.26857 Da 887.72 s	14.8	558.276	NA	NA	0	612	0	6286	0	0	0	1298	0	586	0	17824	204	7232	0	908	0	4454	0	352	0	11010	0	0	2.50949	4196.5	1672.25	NaN	1.46653
2442	558.31671 Da 838.24 s	13.97	557.309	NA	NA	2390	1852	2088	4822	2232	2210	1694	4098	1688	1266	798	7366	748	5284	1956	3480	2408	5926	844	2344	566	3056	2534	3480	3.12221	2103.17	673.614	3.11069	0.610392
1372	560.38887 Da 944.53 s	15.74	561.396	NA	NA	2164	1178	1272	2632	2962	2486	600	2302	1762	3418	0	1962	1016	2092	1626	1312	1402	2284	954	1676	1080	1810	1304	1546	2.11239	713	337.533	Inf	2.89868
1327	563.29679 Da 889.92 s	14.83	564.304	NA	NA	0	644	0	7050	0	136	0	1476	0	634	324	40808	0	6544	0	1138	0	8494	0	0	0	27658	0	0	2.07031	7854.83	3794.04	NaN	2.89868
2447	565.32109 Da 925.04 s	15.42	564.314	NA	NA	512	6542	0	23988	616	1400	396	8832	216	3664	292	151718	598	18472	762	7856	306	30926	334	1172	260	114374	366	476	2.12047	30396.8	14335	Inf	2.89868
2449	567.33594 Da 955.34 s	15.92	566.329	NA	NA	198	5220	0	29538	208	632	0	8404	0	2120	0	57132	380	9622	330	2490	0	4156	0	1004	0	77280	0	0	2.21192	16373.5	7402.39	NaN	2.89868
2450	568.30822 Da 782.55 s	13.04	283.147	NA	NA	0	6260	3248	4978	1446	1630	1652	6424	1816	3230	2216	53444	0	2358	1958	17042	1968	17290	1636	1818	1734	21940	0	4572	2.41135	10276	4261.52	Inf	2.23926
519	570.40870 Da 876.38 s	14.61	571.416	NA	NA	20974	27960	20622	55890	23016	22344	13382	83678	15482	52730	9090	27950	15216	94482	30814	25024	13544	31328	5980	33404	15708	25780	31596	22578	2.93777	23977	8161.62	2.91867	0.806589
2455	572.15558 Da 824.34 s	13.74	571.148	NA	NA	4908	12088	2470	0	2502	7100	3564	6410	2834	10290	998	39886	3264	14482	5464	8184	5788	33320	1328	6998	2236	39694	4030	11280	3.05278	12528.8	4104.07	7.35069	0.610392
1067	574.28459 Da 774.29 s	12.9	575.292	NA	NA	6976	4390	3630	2476	5860	3180	3374	1906	4104	5296	5142	0	3484	4198	4314	2516	3364	702	5322	4138	4486	0	4222	3682	-2.99392	-1816.17	606.618	0.612989	2.89868
587	574.40380 Da 937.99 s	15.63	575.411	NA	NA	3612	4630	3034	4496	4964	4052	1506	6196	2322	8590	2160	4658	1672	6840	4836	4198	3028	4100	1648	4806	2944	3610	4788	4090	2.59525	1979.33	762.676	2.07165	1.46653
2458	579.33619 Da 925.76 s	15.43	578.329	NA	NA	0	2602	0	7668	276	522	0	4410	164	1666	256	69256	216	9960	492	3838	0	14084	176	394	0	49746	434	340	2.08923	13539.3	6480.54	Inf	2.89868
554	583.28418 Da 902.08 s	15.03	584.291	NA	NA	912	1686	244	15720	452	410	0	3502	0	1228	420	34198	182	11772	526	2608	574	8038	256	566	572	21312	0	516	2.60261	8118.17	3119.24	Inf	1.46653
319	584.26106 Da 738.54 s	12.31	585.268	Bilirubin	C33H36N4O6	0	518	0	0	0	0	0	1348	0	0	0	26256	0	1718	0	3286	0	13470	0	0	0	20202	0	0	2.0523	5566.5	2712.32	NaN	4.40945
588	585.29968 Da 938.25 s	15.64	586.307	NA	NA	542	2994	0	17680	354	424	268	13426	0	2660	266	45558	384	41670	0	570	0	4168	224	3280	0	30864	504	1368	2.77362	13510	4870.89	Inf	0.878774
2460	586.49832 Da 986.51 s	16.44	585.491	FAHFA 38:4	C38H66O4	7686	17614	436	11394	1322	122834	2374	18518	4570	37592	420	0	6818	150374	2746	5430	0	5108	0	230916	502	8442	22980	10382	2.15315	47395.8	22012.3	Inf	2.89868
566	599.27063 Da 916.46 s	15.27	600.278	NA	NA	0	592	0	4800	182	0	0	958	0	590	0	13520	0	3672	0	896	0	3448	0	0	0	8670	0	0	2.40014	3080.33	1283.4	NaN	2.23926
594	604.41435 Da 943.15 s	15.72	605.422	NA	NA	1812	922	1262	2558	2728	2768	0	2108	1696	3368	840	2328	964	1682	1386	1370	0	2280	944	0	916	1906	0	1278	2.20186	835	379.224	Inf	2.89868
567	609.29962 Da 916.90 s	15.28	610.307	NA	NA	558	1080	0	14308	0	388	0	2040	0	1394	404	59618	0	11626	226	3454	0	9966	492	0	0	34690	0	274	2.16093	11429.8	5289.3	Inf	2.89868
2471	609.33386 Da 761.65 s	12.69	303.66	NA	NA	552	6896	604	0	2176	238	702	7686	776	2282	572	23986	626	7904	516	3840	3704	27912	604	1400	0	64592	0	2852	2.10896	11563	5482.8	Inf	2.89868
2475	614.52882 Da 1060.83 s	17.68	613.522	NA	NA	4046	8824	0	22904	912	6470	0	10884	702	6922	284	7446	6504	10242	1450	5364	0	5244	276	8444	404	6724	1922	1414	4.10527	7031.83	1712.88	Inf	0
586	618.42978 Da 937.53 s	15.63	619.437	NA	NA	2794	2672	2328	3596	3972	2938	866	4248	1940	5854	1682	3834	1062	5792	3340	2752	0	2316	1202	3562	2590	2624	2884	3254	2.57446	1565.17	607.959	Inf	1.46653
582	626.47103 Da 926.01 s	15.43	627.478	NA	NA	13784	82612	1086	118180	6748	11914	4330	468756	1906	77124	554	46336	32758	635924	1698	11494	1146	37150	0	179216	2102	43622	96448	49698	2.33265	133289	57140.5	Inf	2.23926
1363	636.29594 Da 930.64 s	15.51	659.285	NA	NA	1338	6992	422	32236	988	3206	1670	56186	776	14928	0	38988	3014	164964	370	4510	590	5280	174	57704	678	26240	4734	14448	2.63897	34244	12976.3	Inf	0.878774
2485	639.30268 Da 634.08 s	10.57	638.295	NA	NA	0	0	0	0	0	326	0	2470	0	1198	0	32132	0	2812	0	2104	0	24154	0	0	0	12440	0	0	2.02671	6469.67	3192.2	NaN	4.40945
2486	640.54356 Da 1061.20 s	17.69	639.536	NA	NA	1088	3464	0	6200	162	2856	0	5850	240	3650	0	19052	2734	6172	604	2088	0	1792	0	4082	180	7480	688	562	3.19337	4796	1501.86	Inf	0.369028
651	658.51061 Da 1050.53 s	17.51	659.518	NA	NA	2864	1962	0	1986	770	656	1304	5614	478	3376	0	1404	2560	10230	0	0	0	980	0	5590	274	778	4880	2716	2.07952	1846.83	888.105	NaN	2.89868
2496	660.53272 Da 987.80 s	16.46	659.525	NA	NA	13922	410616	0	76678	1264	55376	0	520056	248	114994	220	44186	88106	217962	2348	53214	204	47302	0	93472	226	67216	5404	2944	2.90025	132673	45745.3	Inf	0.806589
661	667.60962 Da 1065.58 s	17.76	668.617	NA	NA	2492	2854	0	496	328	0	2756	9250	0	10234	0	984	5888	31282	0	0	256	782	0	3754	0	1188	1914	5764	2.02192	4412.83	2182.5	NaN	4.40945
2498	672.25381 Da 935.73 s	15.6	671.247	NA	NA	318	24814	0	0	886	19754	0	53196	0	20720	0	36642	1478	64362	442	4370	0	5990	0	11978	0	31764	548	502	3.76495	22535	5985.47	NaN	0
2500	673.92132 Da 868.28 s	14.47	672.914	NA	NA	2304	666	1006	144	1428	1328	1714	684	1968	782	1780	0	580	862	1704	604	1778	302	712	838	994	0	1166	1504	-2.74556	-785	285.916	0.552997	4.40945
1393	682.53338 Da 988.52 s	16.48	683.541	NA	NA	495666	769602	12500	901000	111612	161634	248314	3106848	73608	1193356	4492	562204	1110230	4405012	32398	48210	34936	218988	1166	2492968	37352	456264	1584020	1044866	2.70239	967888	358160	199.301	0.878774
2502	696.29745 Da 936.00 s	15.6	695.29	NA	NA	0	5456	0	0	382	4320	0	13608	0	4708	0	8878	298	13712	0	1564	0	2422	0	2938	0	8844	0	126	3.84116	5491.33	1429.6	NaN	0
624	698.49816 Da 988.40 s	16.47	350.256	NA	NA	4836	12048	162	12582	1374	3588	5976	25036	1068	10504	0	4120	9444	11468	378	734	372	0	0	15870	564	5822	9418	8220	3.22571	6366.67	1973.73	Inf	0.369028
692	705.52889 Da 1549.75 s	25.83	706.536	PC 30:0	C38H76NO8P	762	8316	0	19172	502	434	684	54874	178	4544	0	10708	11782	79178	608	496	538	1236	0	20384	508	4736	3666	2932	2.39185	15648.5	6542.42	Inf	2.23926
652	710.56520 Da 1050.83 s	17.51	711.572	NA	NA	3136	7672	0	6722	1104	0	1598	27324	376	7042	0	3416	7420	40594	220	0	0	1028	0	23230	0	3064	11190	5948	2.36164	8416.33	3563.77	Inf	2.23926
2504	716.59353 Da 1062.45 s	17.71	715.586	NA	NA	12880	219802	0	50328	774	21092	0	240336	0	79378	0	42900	58734	118482	2118	35478	0	30910	0	54356	0	38806	3170	1766	3.31551	71329.8	21514	Inf	0.369028
693	731.54417 Da 1604.29 s	26.74	732.551	PC 32:1	C40H78NO8P	0	8012	0	22126	0	460	0	35280	0	2682	0	24936	2600	39362	138	2732	0	2844	0	0	186	17190	3196	0	2.98133	12458.7	4178.89	NaN	0.610392
402	738.39300 Da 797.67 s	13.29	739.4	NA	NA	0	0	0	0	594	1668	1170	4280	1666	2154	670	1376	478	8178	1394	2470	2136	1774	0	1600	810	1564	906	2436	2.12508	1473	693.151	NaN	2.89868
669	738.59613 Da 1070.90 s	17.85	739.603	NA	NA	169124	150146	910	168966	49556	51510	81334	714606	38752	259984	384	217034	280402	1142534	14972	11560	14972	58108	0	627450	13192	162288	358358	184228	2.48994	227205	91249.1	Inf	1.46653
636	740.49219 Da 989.14 s	16.49	741.499	NA	NA	1894	2224	0	2870	882	578	1112	4244	422	3220	0	1646	3036	4834	242	420	0	1078	0	3786	360	1414	3120	3140	3.31606	1532.17	462.044	Inf	0.369028
622	750.52085 Da 988.31 s	16.47	751.528	NA	NA	4786	4802	0	5974	1316	1522	2750	12360	950	8880	0	3574	7380	12114	406	774	508	2372	0	20366	390	2246	10262	7328	2.41733	4463.67	1846.53	Inf	2.23926
666	754.56048 Da 1070.69 s	17.84	378.288	NA	NA	3916	4118	0	5292	866	0	3622	11368	944	6366	0	1990	6132	9164	292	0	200	2244	0	7144	348	2572	5606	4600	2.8945	2744.33	948.121	Inf	0.806589
1101	784.45579 Da 783.00 s	13.05	785.463	NA	NA	0	0	0	0	792	0	1220	0	1382	988	644	0	3662	1124	6796	1042	3998	0	10106	8798	11190	0	16580	10962	-2.69349	-2788	1035.09	NaN	4.40945
2513	798.42647 Da 803.02 s	13.38	797.419	NA	NA	0	0	0	0	1008	202	3314	0	2108	1578	1624	1116	5788	1218	9638	2122	5044	0	29376	11728	15782	1432	21160	16676	-2.83069	-4897.5	1730.14	NaN	2.89868
613	80.06207 Da 987.91 s	16.47	81.0694	NA	NA	1806	3434	0	2800	484	924	1624	6976	404	4062	0	2468	3216	9768	178	174	336	958	0	3920	198	1808	4852	3896	3.27411	2340.83	714.952	Inf	0.369028
665	806.58371 Da 1070.39 s	17.84	807.591	NA	NA	1626	2008	0	1918	744	592	740	2188	482	2654	0	586	3238	4702	222	0	0	660	0	3496	0	488	2696	2188	2.42084	977.667	403.854	Inf	2.23926
194	810.41675 Da 682.50 s	11.38	406.216	NA	NA	6340	2748	5588	0	4950	0	4312	3208	5230	5350	6432	6448	4828	6348	10958	5296	6670	4318	7680	6080	3826	1976	5480	5060	-2.81836	-2121.83	752.861	0.656653	2.89868
639	82.07768 Da 989.40 s	16.49	83.085	NA	NA	1930	3670	0	3240	658	1328	1706	9014	534	5330	0	2472	4096	10434	180	228	222	1038	0	5350	206	1616	4558	5466	3.76964	2924.67	775.848	Inf	0
354	824.44760 Da 766.87 s	12.78	413.231	NA	NA	0	0	0	0	956	0	1304	0	2114	966	602	0	3370	0	7604	0	4116	0	10052	7144	14098	0	22004	10834	-2.80284	-3939.67	1405.6	NaN	2.89868
612	84.09333 Da 987.72 s	16.46	85.1006	NA	NA	2066	4058	0	3812	416	948	2134	9192	382	5290	0	1984	4878	11080	0	0	0	1406	0	5176	264	2542	5066	4900	3.78406	2931.83	774.784	NaN	0
85	85.08842 Da 591.44 s	9.86	86.0957	NA	NA	1426688	993352	1043016	1203132	1181220	1056836	1064072	665728	1343480	0	1320504	600568	1091878	1102016	1300018	289466	1127260	264908	1259946	1262516	1221974	891940	1269034	1111440	-3.25054	-433932	133496	0.658304	1.46653
1461	86.03505 Da 805.76 s	13.43	85.0278	NA	NA	1972	2006	1722	454	836	1204	1984	2896	1230	2072	1306	3662	1322	2380	2138	3734	3064	5102	1986	1612	572	3862	1022	2130	2.33857	996.667	426.187	1.96073	2.23926
39	876.45184 Da 542.41 s	9.04	439.233	NA	NA	0	0	316	9518	0	0	0	1948	0	1000	0	10846	0	3886	0	4818	0	18510	0	0	0	38774	0	0	2.20606	7415.33	3361.35	NaN	2.89868
674	884.35816 Da 1072.09 s	17.87	885.365	NA	NA	638	766	172	3738	270	432	706	4118	0	1954	0	7402	498	12204	0	510	0	1802	0	12136	0	8216	546	2406	3.3207	4404.5	1326.38	Inf	0.369028
605	89.96855 Da 958.32 s	15.97	90.9758	NA	NA	10466	5510	10922	4590	9764	5910	5218	5714	9072	8814	9986	4746	8874	6938	10900	7804	10568	6344	8930	7540	7962	3224	9124	9356	-3.99067	-2941.33	737.052	0.705557	0.369028
142	90.04618 Da 631.73 s	10.53	91.0534	NA	NA	3246	408	7926	206	3454	3594	46140	4392	17448	3726	12394	812	3254	1776	24336	1606	13500	0	69924	9884	28528	1838	17946	3472	-3.47628	-18031.8	5187.11	0.214792	0.878774
148	903.45697 Da 634.70 s	10.58	452.736	NA	NA	0	5694	0	80476	0	4750	0	4798	0	1858	432	267162	0	12562	0	12592	134	268076	0	0	0	432784	0	4448	2.14806	91219.5	42466.1	NaN	2.89868
136	919.45170 Da 627.53 s	10.46	460.733	NA	NA	0	820	146	6730	0	1138	0	1494	0	1088	0	70040	0	3046	0	9256	0	55336	0	0	0	31830	0	390	2.14648	15085.2	7027.88	NaN	2.89868
149	925.43894 Da 635.41 s	10.59	463.727	NA	NA	0	1242	0	12376	0	890	0	572	0	416	0	41144	0	0	0	1974	0	24800	0	0	0	33488	0	582	2.24194	9790.33	4366.91	NaN	2.89868
635	94.07742 Da 989.13 s	16.49	95.0847	NA	NA	8194	14572	428	12836	2092	3958	5956	34516	1680	20294	0	9246	19904	45946	678	1350	766	4284	0	21456	1078	8672	20894	17820	3.6261	11106.7	3062.98	Inf	0
522	94.07749 Da 876.68 s	14.61	95.0848	NA	NA	1680	2294	1108	2042	1264	1680	1370	3708	1012	2862	722	1150	1614	3596	1424	1370	902	1708	612	1782	1036	1534	1488	1536	3.15925	919.167	290.944	1.84778	0.369028
846	95.07264 Da 702.94 s	11.72	96.0799	NA	NA	17950	6748	19554	9196	17310	11828	17558	8094	17508	16504	13948	4532	14782	8704	22402	15924	20530	7828	15540	20814	14378	7562	19784	14378	-4.44885	-6594.33	1482.25	0.627593	0
623	96.09309 Da 988.34 s	16.47	97.1004	NA	NA	3616	6454	196	6454	838	2444	2400	13182	690	8270	0	3258	6974	18574	340	564	252	1742	0	8694	482	4258	8268	7976	3.87473	4817.83	1243.4	Inf	0
663	96.09313 Da 1069.73 s	17.83	97.1004	NA	NA	2466	2482	0	2414	890	1338	1984	5902	686	3850	0	3816	3868	9204	0	336	398	1062	0	3888	376	2490	3426	3476	3.62645	2180.33	601.23	Inf	0
584	960.52306 Da 928.66 s	15.48	961.53	NA	NA	0	2684	0	14470	0	626	0	41382	0	3436	0	15126	684	93908	0	766	0	1438	0	22484	0	10840	1508	2722	2.21863	17307.5	7801	Inf	2.89868
