# Supplementary material for: Segmental Bronchial Allergen Challenge Elicits Distinct Metabolic Phenotypes in Allergic Asthma
Source: Metabolites. 2022 Apr 22;12(5):381. doi: 10.3390/metabo12050381 (PMC9145767; doi:10.3390/metabo12050381)
Supplement: Supplementary file 1 [file metabolites-12-00381-s001.zip › Supplemental Table S3.xlsx]

## Sheet: name_map
Query	Match	HMDB	PubChem	KEGG	SMILES	Comment
Indole-3-carboxaldehyde	Inosine	HMDB0000195	6021	C00294	C1=NC(=O)C2=C(N1)N(C=N2)[C@H]3[C@@H]([C@@H]([C@H](O3)CO)O)O	1
Methylparaben	Methylparaben	HMDB0032572	7456	NA	COC(=O)C1=CC=C(C=C1)O	1
Phthalic acid	Phthalic acid	HMDB0002107	1017	C01606	C1=CC=C(C(=C1)C(=O)O)C(=O)O	1
raspberry ketone	4-(4-Hydroxyphenyl)-2-butanone	HMDB0033723	21648	NA	CC(=O)CCC1=CC=C(C=C1)O	1
Geranic acid	Geranic acid	NA	5275520	C16461	CC(C)=CCC/C(C)=C/C(=O)O	1
Phenol sulfate	3-Carboxy-4-methyl-5-propyl-2-furanpropionic acid	HMDB0061112	123979	NA	CCCC1=C(C)C(C(O)=O)=C(CCC(O)=O)O1	1
Gramine	NA	NA	NA	NA	NA	0
Hippurate	Hippuric acid	HMDB0000714	464	C01586	C1=CC=C(C=C1)C(=O)NCC(=O)O	1
Dicyclohexylamine	NA	NA	NA	NA	NA	0
10-Hydroxydecanoate	NA	NA	NA	NA	NA	0
3-Methylhippuric acid	m-Methylhippuric acid	HMDB0013245	99223	NA	CC1=CC=CC(=C1)C(=O)NCC(=O)O	1
NCGC00381364-01_3-propan-2-yl-2,3,6,7,8,8a-hexahydropyrrolo_1,2-a_pyrazine-1,4-dione	NA	NA	NA	NA	NA	0
Dibenzylamine	NA	NA	NA	NA	NA	0
L-Tryptophan	L-Tryptophan	HMDB0000929	6305	C00078	C1=CC=C2C(=C1)C(=CN2)C[C@@H](C(=O)O)N	1	tryptophan metabolism
Indolelactic acid	Indolelactic acid	HMDB0000671	92904	C02043	C1=CC=C2C(=C1)C(=CN2)CC(C(=O)O)O	1
Norlidocaine	Alcophosphamide	HMDB0060432	0	C16551	NP(=O)(OCCCO)N(CCCl)CCCl	1
Cyclo_proline-leucine	NA	NA	NA	NA	NA	0
Indoxyl sulfate	Indoxyl sulfate	HMDB0000682	10258	NA	C1=CC=C2C(=C1)C(=CN2)OS(=O)(=O)O	1
4-Formyl-antipyrine	NA	NA	NA	NA	NA	0
Metaxalone	Metaxalone	HMDB0014798	15459	C07934	CC1=CC(=CC(=C1)OCC2CNC(=O)O2)C	1
Butyryl carnitine _isomer of 920	NA	NA	NA	NA	NA	0
LID_235.1805_10.1	NA	NA	NA	NA	NA	0
4-O-methylolivetolcarboxylic acid	NA	NA	NA	NA	NA	0
N,N_-Dicyclohexylthiourea	NA	NA	NA	NA	NA	0
7-_2-hydroxypropan-2-yl_-1,4a-dimethyl-2,3,4,5,6,7,8,8a-octahydronaphthalen-1-ol	NA	NA	NA	NA	NA	0
Etomidate	Etomidate	HMDB0014437	667484	C07522	CCOC(=O)C1=CN=CN1[C@H](C)C2=CC=CC=C2	1
lenticin	Lenticin	HMDB0061115	442106	C09213	C[N+](C)(C)[C@@H](CC1=CNC2=CC=CC=C12)C([O-])=O	1
8-hydroxy-11-_hydroxymethyl_-1,5,11-trimethyltricyclo_6.2.1.0_,_undec-2-en-9-one	NA	NA	NA	NA	NA	0
LID_251.1754_11.0	NA	NA	NA	NA	NA	0
2,6-Di-tert-butyl-4-nitrophenol	NA	NA	NA	NA	NA	0
Palmitic acid	Palmitic acid	HMDB0000220	985	C00249	CCCCCCCCCCCCCCCC(=O)O	1	Fatty acid metabolism, FA biosynthesis
Hexanoyl-L-Carnitine	L-Hexanoylcarnitine	HMDB0000756	3246938	NA	CCCCCC(=O)O[C@H](CC(=O)[O-])C[N+](C)(C)C	1
Phenylacetylglutamine	Alpha-N-Phenylacetyl-L-glutamine	HMDB0006344	92258	C04148	C1=CC=C(C=C1)CC(=O)N[C@@H](CCC(=O)N)C(=O)O	1	phenylacetate
Tolbutamide	Tolbutamide	HMDB0015256	5505	C07148	CCCCNC(=O)NS(=O)(=O)C1=CC=C(C=C1)C	1
Sulfamethazine	Sulfamethazine	HMDB0015522	5327	C19530	CC1=CC(=NC(=N1)NS(=O)(=O)C2=CC=C(C=C2)N)C	1
Di-n-butyl phthalate	Dibutyl phthalate	HMDB0033244	3026	C14214	CCCCOC(=O)C1=CC=CC=C1C(=O)OCCCC	1
Stearic acid	Stearic acid	HMDB0000827	5281	C01530	CCCCCCCCCCCCCCCCCC(=O)O	1
piperine	Piperine	HMDB0029377	638024	C03882	C1CCN(CC1)C(=O)/C=C/C=C/C2=CC3=C(C=C2)OCO3	1
_2R,3R_-3,7-dihydroxy-6-methoxy-2-phenyl-2,3-dihydrochromen-4-one	NA	NA	NA	NA	NA	0
Octanoyl-L-Carnitine	L-Octanoylcarnitine	HMDB0000791	11953814	C02838	CCCCCCCC(=O)O[C@H](CC(=O)[O-])C[N+](C)(C)C	1	mitochondrial beta oxidation
C17-Sphinganine	NA	NA	NA	NA	NA	0
dehydrocurvularin	NA	NA	NA	NA	NA	0
Cinchonidine	Cinchonidine	HMDB0030282	2757	C11379	C=CC1CN2CCC1CC2C(C3=CC=NC4=CC=CC=C34)O	1
_6_-Gingerol	NA	NA	NA	NA	NA	0
12,13-EODE	NA	NA	NA	NA	NA	0
Lichesterylic acid	NA	NA	NA	NA	NA	0
12-Hydroxyoctadecanoic acid	NA	NA	NA	NA	NA	0
GLYCEROL-MYRISTATE	NA	NA	NA	NA	NA	0
_9Z,12E_-15,16-dihydroxyoctadeca-9,12-dienoic acid	NA	NA	NA	NA	NA	0
1,4a-dimethyl-9-oxo-7-propan-2-yl-3,4,10,10a-tetrahydro-2H-phenanthrene-1-carboxylic acid	NA	NA	NA	NA	NA	0
Decanoyl-L-Carnitine	Decanoylcarnitine	HMDB0000651	10245190	NA	CCCCCCCCCC(=O)OC(CC(=O)[O-])C[N+](C)(C)C	1
_E_-5-_1,2,4a,5-tetramethyl-7-oxo-3,4,8,8a-tetrahydro-2H-naphthalen-1-yl_-3-methylpent-2-enoic acid	NA	NA	NA	NA	NA	0
NCGC00180747-02_5-_1S,2R,4aR_-1,2,4a,5-tetramethyl-7-oxo-3,4,8,8a-tetrahydro-2H-naphthalen-1-yl_-3-methylpentanoic acid	NA	NA	NA	NA	NA	0
_1R,4aS,5R,8aS_-5-_5-hydroxy-3-methylpentyl_-1,4a-dimethyl-6-methylidene-3,4,5,7,8,8a-hexahydro-2H-naphthalene-1-carboxylic acid	NA	NA	NA	NA	NA	0
NCGC00186665-03_2,3-dihydroxypropyl hexadecanoate	NA	NA	NA	NA	NA	0
_2R,3S,4S,5R,6S_-2-_hydroxymethyl_-6-_4-hydroxy-2-_3-methylbut-2-enyl_phenoxy_oxane-3,4,5-triol	NA	NA	NA	NA	NA	0
LAUROYLCARNITINE	Dodecanoylcarnitine	HMDB0002250	168381	NA	CCCCCCCCCCCC(=O)O[C@H](CC(=O)[O-])C[N+](C)(C)C	1
1-Monostearin	Glycerol 1-octadecanoate	HMDB0031075	24699	NA	CCCCCCCCCCCCCCCCCC(=O)OCC(CO)O	1
_2S_-8-_E_-3-hydroxy-3-methylbut-1-enyl_-5,7-dimethoxy-2-phenyl-2,3-dihydrochromen-4-one	NA	NA	NA	NA	NA	0
Neosolaniol	NA	NA	NA	NA	NA	0
FAHFA 24:4	NA	NA	NA	NA	NA	0
Paramethasone	Paramethasone	HMDB0015462	5875	C07413	C[C@@H]1C[C@H]2[C@@H]3C[C@@H](C4=CC(=O)C=C[C@@]4([C@H]3[C@H](C[C@@]2([C@]1(C(=O)CO)O)C)O)C)F	1
Naltrindole	Naltrindole	NA	96024345	C18128	NA	1
Benzyl alcohol _ Hex-Hex	NA	NA	NA	NA	NA	0
Glycochenodeoxycholate	Chenodeoxycholic acid glycine conjugate	HMDB0000637	22833540	C05466	C[C@H](CCC(=O)NCC(=O)O)[C@H]1CCC2[C@@]1(CCC3C2[C@@H](C[C@H]4[C@@]3(CC[C@H](C4)O)C)O)C	1
LPC 14:0	NA	NA	NA	NA	NA	0
PC 16:1e	NA	NA	NA	NA	NA	0
LPC 16:0	NA	NA	NA	NA	NA	0
Bilirubin	Bilirubin	HMDB0000054	21252250	C00486	CC1=C(NC(=C1CCC(=O)O)CC2=C(C(=C(N2)/C=C\3/C(=C(C(=O)N3)C)C=C)C)CCC(=O)O)/C=C\4/C(=C(C(=O)N4)C=C)C	1
FAHFA 38:4	NA	NA	NA	NA	NA	0
PC 30:0	NA	NA	NA	NA	NA	0
PC 32:1	NA	NA	NA	NA	NA	0
