# Supplementary material for: Segmental Bronchial Allergen Challenge Elicits Distinct Metabolic Phenotypes in Allergic Asthma
Source: Metabolites. 2022 Apr 22;12(5):381. doi: 10.3390/metabo12050381 (PMC9145767; doi:10.3390/metabo12050381)
Supplement: Supplementary file 1 [file metabolites-12-00381-s001.zip › Supplemental Table S4.xlsx]

## Sheet: Sheet1
Analyses of the 2000 most	List of proteins part of fatty acid pathways
abundant proteins in blood	Fatty Acid Metabolism; p value (Benjamini corrected): 1.2E-5
eosinophils (Esnault et al.	GENE SYMBOL	PROTEIN NAME
J Proteome Research 2018(Ref# )	ACAA1	acetyl-CoA acyltransferase 1(ACAA1)
using DAVID Bioinformatic	ACAA2	acetyl-CoA acyltransferase 2(ACAA2)
Resources.	ACADM	acyl-CoA dehydrogenase, C-4 to C-12 straight chain(ACADM)
	ACADVL	acyl-CoA dehydrogenase, very long chain(ACADVL)
	ACSF2	acyl-CoA synthetase family member 2(ACSF2)
	ACSL1	acyl-CoA synthetase long-chain family member 1(ACSL1)
	ACSL3	acyl-CoA synthetase long-chain family member 3(ACSL3)
	ACSL4	acyl-CoA synthetase long-chain family member 4(ACSL4)
	ALOX15	arachidonate 15-lipoxygenase(ALOX15)
	C3	complement C3(C3)
	CPT1A	carnitine palmitoyltransferase 1A(CPT1A)
	CPT2	carnitine palmitoyltransferase 2(CPT2)
	DECR1	2,4-dienoyl-CoA reductase 1, mitochondrial(DECR1)
	ECH1	enoyl-CoA hydratase 1(ECH1)
	ECHS1	enoyl-CoA hydratase, short chain 1(ECHS1)
	ECI1	enoyl-CoA delta isomerase 1(ECI1)
	FASN	fatty acid synthase(FASN)
	HADH	hydroxyacyl-CoA dehydrogenase(HADH)
	HADHA	hydroxyacyl-CoA dehydrogenase/3-ketoacyl-CoA thiolase/enoyl-CoA hydratase (trifunctional protein), alpha subunit(HADHA)
	HADHB	hydroxyacyl-CoA dehydrogenase/3-ketoacyl-CoA thiolase/enoyl-CoA hydratase (trifunctional protein), beta subunit(HADHB)
	HSD17B4	hydroxysteroid 17-beta dehydrogenase 4(HSD17B4)
	LYPLA1	lysophospholipase I(LYPLA1)
	LYPLA2	lysophospholipase II(LYPLA2)
	MGLL	monoglyceride lipase(MGLL)
	NDUFAB1	NADH:ubiquinone oxidoreductase subunit AB1(NDUFAB1)
	PRKAA1	protein kinase AMP-activated catalytic subunit alpha 1(PRKAA1)
	PRKAB1	protein kinase AMP-activated non-catalytic subunit beta 1(PRKAB1)
	PRKAG1	protein kinase AMP-activated non-catalytic subunit gamma 1(PRKAG1)
	PTGES3	prostaglandin E synthase 3(PTGES3)
	TBXAS1	thromboxane A synthase 1(TBXAS1)
	TECR	trans-2,3-enoyl-CoA reductase(TECR)
	Fatty Acid degradation; p value (Benjamini corrected): 1.4E-4
	ACAA1	acetyl-CoA acyltransferase 1(ACAA1)
	ACAA2	acetyl-CoA acyltransferase 2(ACAA2)
	ACADM	acyl-CoA dehydrogenase, C-4 to C-12 straight chain(ACADM)
	ACADVL	acyl-CoA dehydrogenase, very long chain(ACADVL)
	ACAT1	acetyl-CoA acetyltransferase 1(ACAT1)
	ACAT2	acetyl-CoA acetyltransferase 2(ACAT2)
	ACSL1	acyl-CoA synthetase long-chain family member 1(ACSL1)
	ACSL3	acyl-CoA synthetase long-chain family member 3(ACSL3)
	ACSL4	acyl-CoA synthetase long-chain family member 4(ACSL4)
	ADH5	alcohol dehydrogenase 5 (class III), chi polypeptide(ADH5)
	ALDH2	aldehyde dehydrogenase 2 family (mitochondrial)(ALDH2)
	ALDH3A2	aldehyde dehydrogenase 3 family member A2(ALDH3A2)
	ALDH9A1	aldehyde dehydrogenase 9 family member A1(ALDH9A1)
	CPT1A	carnitine palmitoyltransferase 1A(CPT1A)
	CPT2	carnitine palmitoyltransferase 2(CPT2)
	ECHS1	enoyl-CoA hydratase, short chain 1(ECHS1)
	ECI1	enoyl-CoA delta isomerase 1(ECI1)
	HADH	hydroxyacyl-CoA dehydrogenase(HADH)
	HADHA	hydroxyacyl-CoA dehydrogenase/3-ketoacyl-CoA thiolase/enoyl-CoA hydratase (trifunctional protein), alpha subunit(HADHA)
	HADHB	hydroxyacyl-CoA dehydrogenase/3-ketoacyl-CoA thiolase/enoyl-CoA hydratase (trifunctional protein), beta subunit(HADHB)
	Fatty Acid beta-oxidation; p value (Benjamini corrected): 7.2E-4
	ACAA1	acetyl-CoA acyltransferase 1(ACAA1)
	ACAA2	acetyl-CoA acyltransferase 2(ACAA2)
	ACADM	acyl-CoA dehydrogenase, C-4 to C-12 straight chain(ACADM)
	ACADVL	acyl-CoA dehydrogenase, very long chain(ACADVL)
	ACAT1	acetyl-CoA acetyltransferase 1(ACAT1)
	ACAT2	acetyl-CoA acetyltransferase 2(ACAT2)
	CPT1A	carnitine palmitoyltransferase 1A(CPT1A)
	CPT2	carnitine palmitoyltransferase 2(CPT2)
	DECR1	2,4-dienoyl-CoA reductase 1, mitochondrial(DECR1)
	ECH1	enoyl-CoA hydratase 1(ECH1)
	ECHS1	enoyl-CoA hydratase, short chain 1(ECHS1)
	ECI1	enoyl-CoA delta isomerase 1(ECI1)
	HADH	hydroxyacyl-CoA dehydrogenase(HADH)
	HADHA	hydroxyacyl-CoA dehydrogenase/3-ketoacyl-CoA thiolase/enoyl-CoA hydratase (trifunctional protein), alpha subunit(HADHA)
	HADHB	hydroxyacyl-CoA dehydrogenase/3-ketoacyl-CoA thiolase/enoyl-CoA hydratase (trifunctional protein), beta subunit(HADHB)
	HIBCH	3-hydroxyisobutyryl-CoA hydrolase(HIBCH)
	HSD17B4	hydroxysteroid 17-beta dehydrogenase 4(HSD17B4)
	Fatty Acid metabolism; p value (Benjamini corrected): 2.9E-3
	ACAA1	acetyl-CoA acyltransferase 1(ACAA1)
	ACAA2	acetyl-CoA acyltransferase 2(ACAA2)
	ACADM	acyl-CoA dehydrogenase, C-4 to C-12 straight chain(ACADM)
	ACADVL	acyl-CoA dehydrogenase, very long chain(ACADVL)
	ACAT1	acetyl-CoA acetyltransferase 1(ACAT1)
	ACAT2	acetyl-CoA acetyltransferase 2(ACAT2)
	ACSL1	acyl-CoA synthetase long-chain family member 1(ACSL1)
	ACSL3	acyl-CoA synthetase long-chain family member 3(ACSL3)
	ACSL4	acyl-CoA synthetase long-chain family member 4(ACSL4)
	CPT1A	carnitine palmitoyltransferase 1A(CPT1A)
	CPT2	carnitine palmitoyltransferase 2(CPT2)
	ECHS1	enoyl-CoA hydratase, short chain 1(ECHS1)
	FASN	fatty acid synthase(FASN)
	HADH	hydroxyacyl-CoA dehydrogenase(HADH)
	HADHA	hydroxyacyl-CoA dehydrogenase/3-ketoacyl-CoA thiolase/enoyl-CoA hydratase (trifunctional protein), alpha subunit(HADHA)
	HADHB	hydroxyacyl-CoA dehydrogenase/3-ketoacyl-CoA thiolase/enoyl-CoA hydratase (trifunctional protein), beta subunit(HADHB)
	HSD17B12	hydroxysteroid 17-beta dehydrogenase 12(HSD17B12)
	PPT1	palmitoyl-protein thioesterase 1(PPT1)
	TECR	trans-2,3-enoyl-CoA reductase(TECR)
